# Supplementary material for: Exploring the chemical space and the bioactivity profile of lactams: a chemoinformatic study
Source: Royal Society of Chemistry journal article supplement (doi:10.1039/c9ra04841c), 2019-01-01
Supplement: c9ra04841c1.xlsx [file c9ra04841c1.xlsx]

## Sheet: SMARTS codes
SMARTS	Rule
[#1,#6]-[#7;R1]-1-[#6;R1]~[#6;R1]-[#6]-1=O	beta_isolated
O=[#6]-1-[#6]~[#6;R2]-[#7;R2]-1	beta_fused1
O=[#6]-1-[#6;R2]-[#6]-[#7;R2]-1	beta_bridged
O=[#6]-1-[#6;R2]~[#6;R2]-[#7]-1	beta_fused2
[#7]-1-[#6]-[C;D4;R2]-[#6]-1=O	beta_spiro1
[#7]-1-[CD4R2]-[#6]-[#6]-1=O	beta_spiro2
[#7;R1]-1-[#6;R1]~[#6;R1]~[#6;R1]-[#6;R1]-1=O	gamma_isolated
[#7R2]-1-[#6;R2]~[#6]~[#6]-[#6]-1=O	gamma_fused1
[#7]-1-[#6;R2]~[#6;R2]~[#6]-[#6]-1=O	gamma_fused2
[#7]-1-[#6]~[#6R2]~[#6;R2]-[#6]-1=O	gamma_fused3
[#7]-1-[#6;R2]-[#6]-[#6;R2]-[#6]-1=O	gamma_bridged1
O=[#6]-1-[#6;R2]-[#6]-[#6]-[#7;R2]-1	gamma_bridged2
O=[#6]-1-[#6]-[#6;R2]-[#6]-[#7;R2]-1	gamma_bridged3
[#7]-1-[C;D4;R2]-[#6]~[#6]-[#6]-1=O	gamma_spiro1
[#7]-1-[#6]-[C;D4;R2]-[#6]-[#6]-1=O	gamma_spiro2
[#7]-1-[#6]~[#6]-[C;D4;R2]-[#6]-1=O	gamma_spiro3
[#7;R1]-1-[#6;R1]~[#6;R1]~[*;R1]~[#6;R1]-[#6;R1]-1=O	delta_isolated
[#7R2]-1-[#6R2]~[#6]~[*]~[#6]-[#6]-1=O	delta_fused1
[#7]-1-[#6R2]~[#6R2]~[*]~[#6]-[#6]-1=O	delta_fused2
[#7]-1-[#6]~[#6R2]~[*R2]~[#6]-[#6]-1=O	delta_fused3
[#7]-1-[#6]~[#6]~[*R2]~[#6R2]-[#6]-1=O	delta_fused4
[#7R2]-1-[#6]~[#6]~[*]~[#6R2]-[#6]-1=O	delta_bridged1
[#7R2]-1-[#6]~[#6]~[*R2]~[#6]-[#6]-1=O	delta_bridged2
[#7R2]-1-[#6]~[#6R2]~[*]~[#6]-[#6]-1=O	delta_bridged3
[#7]-1-[#6R2]~[#6]~[*]~[#6;R2]-[#6]-1=O	delta_bridged4
[#7]-1-[#6]~[#6;R2]~*~[#6;R2]-[#6]-1=O	delta_bridged5
[#7]-1-[#6R2]~[#6]~[*;R2]~[#6]-[#6]-1=O	delta_bridged6
[#7]-1-[C;D4;R2]-[#6]~[*]~[#6]-[#6]-1=O	delta_spiro1
[#7]-1-[#6]-[C;D4;R2]-[*]~[#6]-[#6]-1=O	delta_spiro2
[#7]-1-[#6]~[#6]-[C;D4;R2]-[#6]-[#6]-1=O	delta_spiro3
[#7]-1-[#6]~[#6]~[*]-[C;D4;R2]-[#6]-1=O	delta_spiro4
[#7;R1]-1-[#6;R1]~[#6;R1]~[*;R1]~[*;R1]~[#6;R1]-[#6;R1]-1=O	epsilon_isolated
[#7R2]-1-[#6;R2]~[#6]~[*]~[*]~[#6]-[#6]-1=O	epsilon_fused1
[#7]-1-[#6;R2]~[#6;R2]~[*]~[*]~[#6]-[#6]-1=O	epsilon_fused2
[#7]-1-[#6]~[#6;R2]~[*;R2]~[*]~[#6]-[#6]-1=O	epsilon_fused3
[#7]-1-[#6]~[#6]~[*;R2]~[*;R2]~[#6]-[#6]-1=O	epsilon_fused4
[#7]-1-[#6]~[#6]~[*]~[*;R2]~[#6;R2]-[#6]-1=O	epsilon_fused5
[#7R2]-1-[#6]~[#6;R2]~[*]~[*]~[#6]-[#6]-1=O	epsilon_bridged1
[#7R2]-1-[#6]~[#6]~[*R2]~[*]~[#6]-[#6]-1=O	epsilon_bridged2
[#7R2]-1-[#6]~[#6]~[*]~[*;R2]~[#6]-[#6]-1=O	epsilon_bridged3
[#7R2]-1-[#6]~[#6]~[*]~[*]~[#6R2]-[#6]-1=O	epsilon_bridged4
[#7]-1-[#6;R2]~[#6]~[*R2]~[*]~[#6]-[#6]-1=O	epsilon_bridged5
[#7]-1-[#6;R2]~[#6]~[*]~[*R2]~[#6]-[#6]-1=O	epsilon_bridged6
[#7]-1-[#6;R2]~[#6]~[*]~[*]~[#6R2]-[#6]-1=O	epsilon_bridged7
[#7]-1-[#6]~[#6;R2]~[*]~[*R2]~[#6]-[#6]-1=O	epsilon_bridged8
[#7]-1-[#6;R2]~[#6]~[*]~[*]~[#6R2]-[#6]-1=O	epsilon_bridged9
[#7]-1-[#6]~[#6]~[*;R2]~[*]~[#6R2]-[#6]-1=O	epsilon_bridged10
[#7]-1-[C;D4;R2]-[#6]~[*]~[*]~[#6]-[#6]-1=O	epsilon_spiro1
[#7]-1-[#6]-[C;D4;R2]-[*]~[*]~[#6]-[#6]-1=O	epsilon_spiro2
[#7]-1-[#6]~[#6]-[C;D4;R2]-[*]~[#6]-[#6]-1=O	epsilon_spiro3
[#7]-1-[#6]~[#6]~[*]-[C;D4;R2]-[#6]-[#6]-1=O	epsilon_spiro4
[#7]-1-[#6]~[#6]~[*]~[*]-[C;D4;R2]-[#6]-1=O	epsilon_spiro5

## Sheet: active scaffolds_frequency >20
Murcko (InChI Code)	ScaffID	Frequency	Murcko	Class	Target 1	Target 2	Target 3	Target 4	Target 5	Target 6	Target 7	Target 8	Target 9	Target 10	Target 11	Target 12	Target 13	Target 14	Target 15	Target 16	Target 17	Target 18	Target 19	Target 20	Target 21	Target 22	Target 23	Target 24	Target 25	EF Target 1	EF Target 2	EF Target 3	EF Target 4	EF Target 5	EF Target 6	EF Target 7	EF Target 8	EF Target 9	EF Target 10	EF Target 11	EF Target 12	EF Target 13	EF Target 14	EF Target 15	EF Target 16	EF Target 17	EF Target 18	EF Target 19	EF Target 20
InChI=1S/C10H11NO/c12-10-7-4-8-11(10)9-5-2-1-3-6-9/h1-3,5-6H,4,7-8H2	64	42	O=C1CCCN1c1ccccc1	gamma_single	HepG2,Homo sapiens	Integrin alpha-IIb/beta-3,Homo sapiens	Neuraminidase,Influenza A virus	Onchocerca ochengi,Onchocerca ochengi																						7.32143	1.70213	1.2	1.22222
InChI=1S/C10H12N2O/c13-10-8-11-6-7-12(10)9-4-2-1-3-5-9/h1-5,11H,6-8H2/p+1	45	57	O=C1C[NH2+]CCN1c1ccccc1	delta_single	Renin,Homo sapiens	Renin,Macaca fascicularis																								1.09804	1.0009
InChI=1S/C11H12N2O2/c14-10-6-7-13(10)11(15)12-8-9-4-2-1-3-5-9/h1-5H,6-8H2,(H,12,15)	118	28	O=C1CCN1C(=O)NCc1ccccc1	beta_single	Beta-chymotrypsin,Homo sapiens	Tryptase,Homo sapiens																								4.25	1.07059
InChI=1S/C11H13NO/c1-7-10-9-5-3-2-4-8(9)6-12(10)11(7)13/h6,9-10H,1-5H2	190	21	C=C1C(=O)N2C=C3CCCCC3C12	beta_fused	Beta-lactamase,Enterobacter cloacae	Beta-lactamase SHV-1,Escherichia coli	Beta-lactamase TEM,Escherichia coli																							1.68239	1.1	1.69605
InChI=1S/C12H10N2O3S/c15-11-10(8-9-4-1-2-5-13-9)12-14(11)6-3-7-18(12,16)17/h1-6,8,12H,7H2/b10-8-	19	76	O=C1/C(=C/c2ccccn2)C2N1C=CCS2(=O)=O	beta_fused	Beta-lactamase,Enterobacter cloacae	Beta-lactamase AmpC,Escherichia coli K-12	Beta-lactamase TEM,Escherichia coli	Beta-lactamase class C,Enterobacter cloacae																						1.64033	1.46667	1.97872	1.26645
InChI=1S/C12H12N2O/c15-12-10-5-1-2-6-11(10)13-8-9-4-3-7-14(9)12/h1-2,5-6,8-9H,3-4,7H2	137	26	O=C1c2ccccc2N=CC2CCCN12	epsilon_fused	CH1,Homo sapiens	MCF7,Homo sapiens																								1.66667	4.16514
InChI=1S/C14H13N3O2/c18-13-6-15-14(19)12-5-9-8-3-1-2-4-10(8)16-11(9)7-17(12)13/h1-4,12,16H,5-7H2,(H,15,19)	99	32	O=C1NCC(=O)N2Cc3[nH]c4ccccc4c3CC12	delta_fused	ATP-binding cassette sub-family G member 2,Homo sapiens	Solute carrier organic anion transporter family member 1B1,Homo sapiens	Solute carrier organic anion transporter family member 2B1,Homo sapiens																							1.2	1.44444	4
InChI=1S/C14H13NO2/c16-13-9-15(11-6-7-11)14(17)12(13)8-10-4-2-1-3-5-10/h1-5,8,11H,6-7,9H2	139	26	O=C1CN(C2CC2)C(=O)C1=Cc1ccccc1	gamma_single	Brassica rapa subsp. campestris,Brassica rapa subsp. campestris	Echinochloa crus-galli,Echinochloa crus-galli		HCT-116,Homo sapiens																						1.1	1.7
InChI=1S/C15H11NO2/c17-14-12-8-4-5-9-13(12)16(15(14)18)10-11-6-2-1-3-7-11/h1-9H,10H2	1	251	O=C1C(=O)N(Cc2ccccc2)c2ccccc21	gamma_fused	A-375,Homo sapiens	Aldehyde dehydrogenase 1A1,Homo sapiens	Caspase-3,Homo sapiens	HCT-116,Homo sapiens	HT-29,Homo sapiens	HepG2,Homo sapiens	Jurkat,Homo sapiens	K562,Homo sapiens	MDA-MB-231,Homo sapiens	Muscarinic acetylcholine receptor M5,Homo sapiens	NCI-H1299,Homo sapiens															1.0625	2.375	1.3046	1.15323	1.44878	5.35027	1.4359	1.37524	3.08791	10.5	40
InChI=1S/C15H13NO/c17-15-10-13-8-4-5-9-14(13)16(15)11-12-6-2-1-3-7-12/h1-9H,10-11H2	48	54	O=C1Cc2ccccc2N1Cc1ccccc1	gamma_fused	Aldehyde reductase,Rattus norvegicus	Aldose reductase,Rattus norvegicus	HepG2,Homo sapiens	K562,Homo sapiens	MDA-MB-231,Homo sapiens	Norepinephrine transporter,Homo sapiens	PC-3,Homo sapiens																			1.66667	1.07438	3.66071	1.16597	3.08791	1.11111	5.2973
InChI=1S/C15H13NO/c17-15-11-14(12-7-3-1-4-8-12)16(15)13-9-5-2-6-10-13/h1-10,14H,11H2	2	149	O=C1CC(c2ccccc2)N1c1ccccc1	beta_single	11-beta-hydroxysteroid dehydrogenase 1,Mus musculus	ACHN,Homo sapiens	CFPAC-1,Homo sapiens	CHO-K1,Cricetulus griseus	DLD-1,Homo sapiens	DU-145,Homo sapiens	HCT-116,Homo sapiens	HeLa,Homo sapiens	IMR-32,Homo sapiens	MCF7,Homo sapiens	MDA-MB-231,Homo sapiens	MOLT-4,Homo sapiens	NCI-H460,Homo sapiens	SW-620,Homo sapiens	SW480,Homo sapiens	T98G,Homo sapiens										1.07895	1.1	1.6	2.36111	1.28	7.04	3.69032	27.4667	1.33058	2.1597	1.0293	1.2	3.41818	1.16667	4	1.73333
InChI=1S/C15H13NO/c17-15-14-9-5-4-8-13(14)11-16(15)10-12-6-2-1-3-7-12/h1-9H,10-11H2	27	71	O=C1c2ccccc2CN1Cc1ccccc1	gamma_fused	Histone deacetylase 1,Homo sapiens	Histone deacetylase 4,Homo sapiens	Histone deacetylase 6,Homo sapiens																							3.33333	1.2	1.21739
InChI=1S/C15H20N2O3S/c18-15-5-4-12-17(15)13-6-8-14(9-7-13)21(19,20)16-10-2-1-3-11-16/h6-9H,1-5,10-12H2	174	23	O=C1CCCN1c1ccc(S(=O)(=O)N2CCCCC2)cc1	gamma_single	Aldo-keto-reductase family 1 member C3,Homo sapiens																									2
InChI=1S/C15H24N2O/c18-14-7-1-6-13-12-5-3-9-16-8-2-4-11(15(12)16)10-17(13)14/h11-13,15H,1-10H2/p+1	150	25	O=C1CCCC2C3CCC[NH+]4CCCC(CN12)C34	delta_fused	Hepatitis B virus,Hepatitis B virus																									1.5
InChI=1S/C16H12N4O2/c21-13-7-6-11(8-17-13)20-15(10-4-2-1-3-5-10)12-9-18-19-14(12)16(20)22/h1-9,15H,(H,17,21)(H,18,19)	4	124	O=C1c2n[nH]cc2C(c2ccccc2)N1c1ccc(=O)[nH]c1	gamma_fused	Bromodomain-containing protein 2,Homo sapiens	Bromodomain-containing protein 3,Homo sapiens	Bromodomain-containing protein 4,Homo sapiens	CREB-binding protein,Homo sapiens																						1.06723	1.05469	1.05263	2.23776
InChI=1S/C16H13NO2/c18-15-13-8-4-5-9-14(13)17(16(15)19)11-10-12-6-2-1-3-7-12/h1-9H,10-11H2	79	37	O=C1C(=O)N(CCc2ccccc2)c2ccccc21	gamma_fused	Aldehyde dehydrogenase,Homo sapiens	Aldehyde dehydrogenase 1A1,Homo sapiens	Aldehyde dehydrogenase dimeric NADP-preferring,Homo sapiens	U-937,Homo sapiens																						2.88889	1.58333	1.26667	1.8
InChI=1S/C16H13NOS/c18-15-13-8-4-5-9-14(13)16(17(15)10-11-19-16)12-6-2-1-3-7-12/h1-9H,10-11H2	75	39	O=C1c2ccccc2C2(c3ccccc3)SCCN12	gamma_fused	Human immunodeficiency virus type 1 reverse transcriptase,Human immunodeficiency virus 1	MT2,Homo sapiens																								1.51351	1.5
InChI=1S/C16H14N2O/c19-16-15(17-13-7-3-1-4-8-13)11-12-18(16)14-9-5-2-6-10-14/h1-11,17H,12H2	160	24	O=C1C(Nc2ccccc2)=CCN1c1ccccc1	gamma_single	Pseudomonas aeruginosa,Pseudomonas aeruginosa																									1.53846
InChI=1S/C16H14N4O/c21-16-10-18-15(19-8-6-17-11-19)9-14-13-4-2-1-3-12(13)5-7-20(14)16/h1-4,6,8-9,11H,5,7,10H2	57	48	O=C1CN=C(n2ccnc2)C=C2c3ccccc3CCN12	epsilon_fused	Metabotropic glutamate receptor 5,Homo sapiens																									1.06075
InChI=1S/C16H15NO/c18-16-15-9-5-4-8-14(15)12-17(16)11-10-13-6-2-1-3-7-13/h1-9H,10-12H2	151	25	O=C1c2ccccc2CN1CCc1ccccc1	gamma_fused	Voltage-gated potassium channel subunit Kv1.5,Homo sapiens																									4.71429
InChI=1S/C16H16N2O/c19-16-15(17-13-7-3-1-4-8-13)11-12-18(16)14-9-5-2-6-10-14/h1-10,15,17H,11-12H2	67	41	O=C1C(Nc2ccccc2)CCN1c1ccccc1	gamma_single	Histone deacetylase 6,Homo sapiens	Histone deacetylase 8,Homo sapiens																								1.01449	1.22222
InChI=1S/C17H12N6O/c24-17-15-13(8-18-21-15)16(11-4-2-1-3-5-11)23(17)12-6-7-14-20-19-10-22(14)9-12/h1-10,16H,(H,18,21)	22	73	O=C1c2[nH]ncc2C(c2ccccc2)N1c1ccc2nncn2c1	gamma_fused	Bromodomain-containing protein 2,Homo sapiens	Bromodomain-containing protein 3,Homo sapiens	Bromodomain-containing protein 4,Homo sapiens																							1.06723	1.05469	1.05263
InChI=1S/C17H13N3O/c21-17-15-14(11-18-19-15)16(12-7-3-1-4-8-12)20(17)13-9-5-2-6-10-13/h1-11,16H,(H,18,19)	37	61	O=C1c2n[nH]cc2C(c2ccccc2)N1c1ccccc1	gamma_fused	p53-binding protein Mdm-2,Homo sapiens																									1.24174
InChI=1S/C17H14N2OS/c20-17-11-18-14(16-6-3-9-21-16)10-15-13-5-2-1-4-12(13)7-8-19(15)17/h1-6,9-10H,7-8,11H2	192	21	O=C1CN=C(c2cccs2)C=C2c3ccccc3CCN12	epsilon_fused	Metabotropic glutamate receptor 1,Homo sapiens	Metabotropic glutamate receptor 5,Homo sapiens																								4.46482	1.03911
InChI=1S/C17H15N5O/c23-17-16-20-19-15(14-8-4-5-9-18-14)22(16)11-10-21(17)12-13-6-2-1-3-7-13/h1-9H,10-12H2	180	22	O=C1c2nnc(-c3ccccn3)n2CCN1Cc1ccccc1	delta_fused	P2X purinoceptor 7,Homo sapiens	P2X purinoceptor 7,Rattus norvegicus																								1.08088	2.26753
InChI=1S/C17H15N5O2S/c23-14(20-17-12(7-8-25-17)16-18-10-19-21-16)9-22-13-4-2-1-3-11(13)5-6-15(22)24/h1-4,7-8,10H,5-6,9H2,(H,20,23)(H,18,19,21)	152	25	O=C(CN1C(=O)CCc2ccccc21)Nc1sccc1-c1ncn[nH]1	delta_fused	c-Jun N-terminal kinase 1,Homo sapiens	c-Jun N-terminal kinase 2,Homo sapiens	c-Jun N-terminal kinase 3,Homo sapiens																							1.16667	1.07692	1.53846
InChI=1S/C17H16N2O2/c20-16-13-18(17(21)14-7-3-1-4-8-14)11-12-19(16)15-9-5-2-6-10-15/h1-10H,11-13H2	92	34	O=C(c1ccccc1)N1CCN(c2ccccc2)C(=O)C1	delta_single	P2X purinoceptor 7,Homo sapiens																									1.08088
InChI=1S/C17H16N2O2/c20-16-17(21)19(15-9-5-2-6-10-15)12-11-18(16)13-14-7-3-1-4-8-14/h1-10H,11-13H2	28	71	O=C1C(=O)N(c2ccccc2)CCN1Cc1ccccc1	delta_single	P2X purinoceptor 7,Homo sapiens																									1.01999
InChI=1S/C17H16N2O3/c20-15-11-16(22-14-9-5-2-6-10-14)19(15)17(21)18-12-13-7-3-1-4-8-13/h1-10,16H,11-12H2,(H,18,21)	15	82	O=C1CC(Oc2ccccc2)N1C(=O)NCc1ccccc1	beta_single	Leukocyte elastase,Homo sapiens																									1.25158
InChI=1S/C17H16N4O2/c22-16-11-5-3-6-12(15(11)13-7-4-10-21(13)16)19-17(23)20-14-8-1-2-9-18-14/h1-3,5-6,8-9,13H,4,7,10H2,(H2,18,19,20,23)	161	24	O=C(Nc1ccccn1)Nc1cccc2c1C1CCCN1C2=O	gamma_fused	Cyclin-dependent kinase 1,Homo sapiens	Cyclin-dependent kinase 1/cyclin B,Homo sapiens	Cyclin-dependent kinase 2,Homo sapiens	Cyclin-dependent kinase 2/cyclin A,Homo sapiens	Cyclin-dependent kinase 4,Homo sapiens																					6.25	5.66667	1.57143	2.09091	1.04167
InChI=1S/C17H17N3O2/c21-16-11-15(10-13-4-2-1-3-5-13)20(16)17(22)19-12-14-6-8-18-9-7-14/h1-9,15H,10-12H2,(H,19,22)	119	28	O=C1CC(Cc2ccccc2)N1C(=O)NCc1ccncc1	beta_single	Leukocyte elastase,Homo sapiens																									1.33104
InChI=1S/C17H17N5O2/c23-16-11-4-3-5-12(15(11)13-6-1-2-9-22(13)16)20-17(24)21-14-10-18-7-8-19-14/h3-5,7-8,10,13H,1-2,6,9H2,(H2,19,20,21,24)	141	26	O=C(Nc1cnccn1)Nc1cccc2c1C1CCCCN1C2=O	gamma_fused	Cyclin-dependent kinase 5/CDK5 activator 1,Homo sapiens	HCT-116,Homo sapiens	Huh-7,Homo sapiens	MDA-MB-231,Homo sapiens	PC-3,Homo sapiens																					1.83721	4.6129	4	1.54396	5.2973
InChI=1S/C17H17NO/c19-17-12-11-16(15-9-5-2-6-10-15)18(17)13-14-7-3-1-4-8-14/h1-10,16H,11-13H2	59	47	O=C1CCC(c2ccccc2)N1Cc1ccccc1	gamma_single	Orexin receptor 1,Homo sapiens																									1.04959
InChI=1S/C17H18N4O5S2/c22-14(17-18-6-9-27-17)10-19-15(23)11-20-7-8-21(12-16(20)24)28(25,26)13-4-2-1-3-5-13/h1-6,9H,7-8,10-12H2,(H,19,23)	96	33	O=C(CN1CCN(S(=O)(=O)c2ccccc2)CC1=O)NCC(=O)c1nccs1	delta_single	Coagulation factor X,Homo sapiens																									1.67391
InChI=1S/C17H22N2O2/c20-16(13-7-3-1-4-8-13)18-15-11-12-19(17(15)21)14-9-5-2-6-10-14/h1,3-4,7-8,14-15H,2,5-6,9-12H2,(H,18,20)	142	26	O=C(NC1CCN(C2CCCCC2)C1=O)c1ccccc1	gamma_single	C-C chemokine receptor type 2,Homo sapiens	C-C chemokine receptor type 5,Homo sapiens																								1.11765	1.375
InChI=1S/C17H22N2O2/c20-16-11-13(12-19(16)15-9-5-2-6-10-15)17(21)18-14-7-3-1-4-8-14/h1,3-4,7-8,13,15H,2,5-6,9-12H2,(H,18,21)	80	37	O=C(Nc1ccccc1)C1CC(=O)N(C2CCCCC2)C1	gamma_single	Mycobacterium tuberculosis H37Rv,Mycobacterium tuberculosis H37Rv																									2.25926
InChI=1S/C18H14N2O/c21-18-16-10-17-14(7-4-8-19-17)9-15(16)12-20(18)11-13-5-2-1-3-6-13/h1-10H,11-12H2	181	22	O=C1c2cc3ncccc3cc2CN1Cc1ccccc1	gamma_fused	Human immunodeficiency virus type 1 integrase,Human immunodeficiency virus 1	Integrase,Human immunodeficiency virus 1																								2.32143	2.96078
InChI=1S/C18H14N2O/c21-18-16-8-4-5-9-17(16)19-11-15-10-14(12-20(15)18)13-6-2-1-3-7-13/h1-9,11-12,15H,10H2	62	43	O=C1c2ccccc2N=CC2CC(c3ccccc3)=CN12	epsilon_fused	K562,Homo sapiens																									1.44616
InChI=1S/C18H14N2O3S/c21-18-15(10-11-20(18)12-13-6-2-1-3-7-13)17-14-8-4-5-9-16(14)24(22,23)19-17/h1-10H,11-12H2	128	27	O=C1C(C2=NS(=O)(=O)c3ccccc32)=CCN1Cc1ccccc1	gamma_single	Genome polyprotein,Hepatitis C virus genotype 1b (isolate Con1) (HCV)																									1.07407
InChI=1S/C18H16N4O2/c23-18-16-12-14(13-24-17-8-4-5-9-19-17)20-22(16)11-10-21(18)15-6-2-1-3-7-15/h1-9,12H,10-11,13H2	12	90	O=C1c2cc(COc3ccccn3)nn2CCN1c1ccccc1	delta_fused	Metabotropic glutamate receptor 3,Rattus norvegicus																									1.04143
InChI=1S/C18H18N2O2/c21-17-12-19-18(22)16(11-14-7-3-1-4-8-14)20(17)13-15-9-5-2-6-10-15/h1-10,16H,11-13H2,(H,19,22)	162	24	O=C1NCC(=O)N(Cc2ccccc2)C1Cc1ccccc1	delta_single	Histone deacetylase 6,Homo sapiens	Matrix metalloproteinase-1,Homo sapiens																								1.21739	1.04
InChI=1S/C18H18N4O2/c23-17-12-6-5-7-13(16(12)14-8-2-4-11-22(14)17)20-18(24)21-15-9-1-3-10-19-15/h1,3,5-7,9-10,14H,2,4,8,11H2,(H2,19,20,21,24)	6	122	O=C(Nc1ccccn1)Nc1cccc2c1C1CCCCN1C2=O	gamma_fused	Caco-2,Homo sapiens	Cyclin-dependent kinase 1,Homo sapiens	Cyclin-dependent kinase 5/CDK5 activator 1,Homo sapiens	HCT-116,Homo sapiens	Huh-7,Homo sapiens	MDA-MB-231,Homo sapiens	NCI-H727,Homo sapiens	PC-3,Homo sapiens																		4.11111	12.5	1.28605	3.07527	2.4	1.62522	1.02924	4.41441
InChI=1S/C18H19NO/c20-18-13-7-12-17(16-10-5-2-6-11-16)19(18)14-15-8-3-1-4-9-15/h1-6,8-11,17H,7,12-14H2	52	50	O=C1CCCC(c2ccccc2)N1Cc1ccccc1	delta_single	Orexin receptor 2,Homo sapiens																									1.02577
InChI=1S/C18H20N4O5S2/c23-15(18-19-6-9-28-18)10-20-16(24)11-21-7-8-22(12-17(21)25)29(26,27)13-14-4-2-1-3-5-14/h1-6,9H,7-8,10-13H2,(H,20,24)	153	25	O=C(CN1CCN(S(=O)(=O)Cc2ccccc2)CC1=O)NCC(=O)c1nccs1	delta_single	Coagulation factor X,Homo sapiens	Plasminogen,Homo sapiens	Trypsin I,Homo sapiens																							1.67391	3.33333	2.61364
InChI=1S/C19H14N4O3/c24-16-15-6-2-1-5-14(15)11-23(16)12-19(17(25)21-18(26)22-19)8-7-13-4-3-9-20-10-13/h1-6,9-10H,11-12H2,(H2,21,22,25,26)	122	28	O=C1NC(=O)C(C#Cc2cccnc2)(CN2Cc3ccccc3C2=O)N1	gamma_fused	ADAM10,Homo sapiens	Matrix metalloproteinase-2,Homo sapiens																								22	7.66667
InChI=1S/C19H15N3O2/c23-19-17-12-20-13-21-18(17)24-11-10-22(19)16-8-6-15(7-9-16)14-4-2-1-3-5-14/h1-9,12-13H,10-11H2	123	28	O=C1c2cncnc2OCCN1c1ccc(-c2ccccc2)cc1	epsilon_fused	Diacylglycerol O-acyltransferase 1,Homo sapiens	Rattus norvegicus,Rattus norvegicus																								1.17808	2.39726
InChI=1S/C19H16N4O2/c24-16-9-8-14(10-20-16)23-18(12-4-2-1-3-5-12)15-11-22(13-6-7-13)21-17(15)19(23)25/h1-5,8-11,13,18H,6-7H2,(H,20,24)	163	24	O=C1c2nn(C3CC3)cc2C(c2ccccc2)N1c1ccc(=O)[nH]c1	gamma_fused	Bromodomain-containing protein 2,Homo sapiens	Bromodomain-containing protein 3,Homo sapiens	Bromodomain-containing protein 4,Homo sapiens	CREB-binding protein,Homo sapiens																						1.06723	1.05469	1.05263	5.81818
InChI=1S/C19H18N2O4S/c22-18-16-12-15(26(24,25)20-10-4-5-11-20)8-9-17(16)21(19(18)23)13-14-6-2-1-3-7-14/h1-3,6-9,12H,4-5,10-11,13H2	9	98	O=C1C(=O)N(Cc2ccccc2)c2ccc(S(=O)(=O)N3CCCC3)cc21	gamma_fused	Caspase-1,Homo sapiens	Caspase-3,Homo sapiens	Caspase-7,Homo sapiens																							2.76316	1.3046	1.11579
InChI=1S/C19H18N4O/c24-19-11-21-18(22-9-7-20-12-22)10-17-16-3-1-2-14(13-4-5-13)15(16)6-8-23(17)19/h1-3,7,9-10,12-13H,4-6,8,11H2	83	36	O=C1CN=C(n2ccnc2)C=C2c3cccc(C4CC4)c3CCN12	epsilon_fused	Metabotropic glutamate receptor 1,Homo sapiens	Metabotropic glutamate receptor 5,Homo sapiens																								3.03856	1.21229
InChI=1S/C19H18N4O2/c24-19-13-25-16-9-5-4-8-15(16)23(19)12-18-20-17(21-22-18)11-10-14-6-2-1-3-7-14/h1-9H,10-13H2,(H,20,21,22)	76	39	O=C1COc2ccccc2N1Cc1nnc(CCc2ccccc2)[nH]1	delta_fused	Sodium/glucose cotransporter 2,Homo sapiens																									1.05995
InChI=1S/C19H19N3O4/c23-16-9-15-19(25)22-7-4-8-26-17(22)12-21(15)11-14(16)18(24)20-10-13-5-2-1-3-6-13/h1-3,5-6,9,11,17H,4,7-8,10,12H2,(H,20,24)	77	39	O=C(NCc1ccccc1)c1cn2c(cc1=O)C(=O)N1CCCOC1C2	delta_fused	Human immunodeficiency virus,Human immunodeficiency virus	Human immunodeficiency virus 1,Human immunodeficiency virus 1	Integrase,Human immunodeficiency virus 1																							1.03448	1.54167	2.96078
InChI=1S/C19H20N2O2/c22-18-10-5-13-21(18)17-9-4-8-16(14-17)19(23)20-12-11-15-6-2-1-3-7-15/h1-4,6-9,14H,5,10-13H2,(H,20,23)	155	25	O=C(NCCc1ccccc1)c1cccc(N2CCCC2=O)c1	gamma_single	Beta-secretase 1,Homo sapiens	Cathepsin D,Homo sapiens	Plasmodium falciparum,Plasmodium falciparum																							1.15254	1.1	2.32984
InChI=1S/C19H26N2O/c22-19-18-9-5-4-6-15(18)14-21(19)17-10-12-20(13-11-17)16-7-2-1-3-8-16/h4-6,9,16-17H,1-3,7-8,10-14H2/p+1	26	72	O=C1c2ccccc2CN1C1CC[NH+](C2CCCCC2)CC1	gamma_fused	Poly [ADP-ribose] polymerase-1,Homo sapiens	Poly [ADP-ribose] polymerase-1,Mus musculus																								1.81333	1.17391
InChI=1S/C20H14N6O2/c27-17-7-6-14(10-23-17)26-19(13-4-2-1-3-5-13)16-11-25(24-18(16)20(26)28)15-8-21-12-22-9-15/h1-12,19H,(H,23,27)	124	28	O=C1c2nn(-c3cncnc3)cc2C(c2ccccc2)N1c1ccc(=O)[nH]c1	gamma_fused	Bromodomain-containing protein 2,Homo sapiens	Bromodomain-containing protein 3,Homo sapiens	Bromodomain-containing protein 4,Homo sapiens	CREB-binding protein,Homo sapiens	p53-binding protein Mdm-2,Homo sapiens																					1.06723	1.05469	1.05263	5.81818	1.24174
InChI=1S/C20H14N6O2/c27-19-16(7-4-8-23-19)26-18(13-5-2-1-3-6-13)15-11-25(24-17(15)20(26)28)14-9-21-12-22-10-14/h1-12,18H,(H,23,27)	182	22	O=C1c2nn(-c3cncnc3)cc2C(c2ccccc2)N1c1ccc[nH]c1=O	gamma_fused	p53-binding protein Mdm-2,Homo sapiens																									1.24174
InChI=1S/C20H16N2O3S2/c23-18-12-25-16-7-6-14(11-17-19(24)21-20(26)27-17)10-15(16)22(18)9-8-13-4-2-1-3-5-13/h1-7,10-11H,8-9,12H2,(H,21,24,26)/p-1/b17-11-	109	30	O=C1[N-]C(=S)S/C1=C\c1ccc2c(c1)N(CCc1ccccc1)C(=O)CO2	delta_fused	PI3-kinase p110-gamma subunit,Homo sapiens																									1.02128
InChI=1S/C20H17N3O2/c24-17-11-21-20(25)16-10-14-13-8-4-5-9-15(13)22-18(14)19(23(16)17)12-6-2-1-3-7-12/h1-9,16,19,22H,10-11H2,(H,21,25)	51	52	O=C1NCC(=O)N2C1Cc1c([nH]c3ccccc13)C2c1ccccc1	delta_fused	Methionyl-tRNA synthetase, putative,Trypanosoma brucei brucei (strain 927/4 GUTat10.1)	Phosphodiesterase 5A,Bos taurus																								5	1.25
InChI=1S/C20H17N3O3/c24-19-16(13-7-5-10-21-18(13)22-19)17-12-6-1-2-8-14(12)23(20(17)25)15-9-3-4-11-26-15/h1-2,5-8,10,15H,3-4,9,11H2,(H,21,22,24)/b17-16+	105	31	O=C1Nc2ncccc2/C1=C1\C(=O)N(C2CCCCO2)c2ccccc21	gamma_fused	HL-60,Homo sapiens	KB,Homo sapiens	Leishmania donovani,Leishmania donovani	Trypanosoma brucei rhodesiense,Trypanosoma brucei rhodesiense																						1.55556	9.375	9.66667	1.13333
InChI=1S/C20H18N2O2/c23-20-6-3-13-22(20)16-7-9-17(10-8-16)24-14-15-11-12-21-19-5-2-1-4-18(15)19/h1-2,4-5,7-12H,3,6,13-14H2	130	27	O=C1CCCN1c1ccc(OCc2ccnc3ccccc23)cc1	gamma_single	ADAM17,Homo sapiens	ADAM17,Sus scrofa																								2.5641	1.05556
InChI=1S/C20H21N3O/c24-19-14-22-20(15-6-2-1-3-7-15)17-8-4-5-9-18(17)23(19)16-10-12-21-13-11-16/h1-9,16,21H,10-14H2/p+1	183	22	O=C1CN=C(c2ccccc2)c2ccccc2N1C1CC[NH2+]CC1	epsilon_fused	Rattus norvegicus,Rattus norvegicus																									1.75799
InChI=1S/C20H21NO2/c22-19-12-11-17-20(16-9-5-2-6-10-16)18(13-21(17)19)23-14-15-7-3-1-4-8-15/h1-10,17-18,20H,11-14H2	165	24	O=C1CCC2C(c3ccccc3)C(OCc3ccccc3)CN12	gamma_fused	Gerbillinae,Gerbillinae	Meriones unguiculatus,Meriones unguiculatus	Neurokinin 1 receptor,Homo sapiens																							1.21739	1.18182	1.14667
InChI=1S/C20H28N2O/c23-20-9-5-4-8-18-14-17-11-13-21(15-19(17)22(18)20)12-10-16-6-2-1-3-7-16/h1-3,6-7,17-19H,4-5,8-15H2/p+1	102	32	O=C1CCCCC2CC3CC[NH+](CCc4ccccc4)CC3N12	epsilon_fused	Baculoviral IAP repeat-containing protein 2,Homo sapiens																									1.13636
InChI=1S/C21H15N5O/c27-21-18-17(24-20(25-18)15-11-22-13-23-12-15)19(14-7-3-1-4-8-14)26(21)16-9-5-2-6-10-16/h1-13,19H,(H,24,25)	39	60	O=C1c2nc(-c3cncnc3)[nH]c2C(c2ccccc2)N1c1ccccc1	gamma_fused	Protein Mdm4,Homo sapiens	p53-binding protein Mdm-2,Homo sapiens																								9.2381	1.24174
InChI=1S/C21H15N7OS2/c29-17-10-15(12-6-2-1-3-7-12)28(17)21-27-24-16(30-21)11-22-20-26-25-18-13-8-4-5-9-14(13)23-19(18)31-20/h1-9,15H,10-11H2,(H,22,26)	166	24	O=C1CC(c2ccccc2)N1c1nnc(CNc2nnc3c4ccccc4nc-3s2)s1	beta_single	Cyclooxygenase-1,Homo sapiens	Cyclooxygenase-2,Homo sapiens																								1.625	1.59091
InChI=1S/C21H16N7O/c29-19-10-9-16-11-22-13-23-21(16)28(19)12-14-5-7-15(8-6-14)17-3-1-2-4-18(17)20-24-26-27-25-20/h1-8,11,13H,9-10,12H2/q-1	116	29	O=C1CCc2cncnc2N1Cc1ccc(-c2ccccc2-c2nn[n-]n2)cc1	delta_fused	Angiotensin II receptor (AT-1) type-1,Rattus norvegicus	Type-1 angiotensin II receptor,Homo sapiens																								1.68182	1.6
InChI=1S/C21H17NO/c23-21-19(16-10-4-1-5-11-16)20(17-12-6-2-7-13-17)22(21)18-14-8-3-9-15-18/h1-15,19-20H	13	86	O=C1C(c2ccccc2)C(c2ccccc2)N1c1ccccc1	beta_single	Acyl coenzyme A:cholesterol acyltransferase 1,Homo sapiens	MCF7,Homo sapiens	MDA-MB-231,Homo sapiens																							4	2.72888	1.88706
InChI=1S/C21H17NO2/c23-21-20(24-18-14-8-3-9-15-18)19(16-10-4-1-5-11-16)22(21)17-12-6-2-7-13-17/h1-15,19-20H	53	50	O=C1C(Oc2ccccc2)C(c2ccccc2)N1c1ccccc1	beta_single	Estrogen receptor alpha,Homo sapiens																									3.66667
InChI=1S/C21H18N2O3/c24-20-18(13-7-1-3-9-15(13)22-20)19-14-8-2-4-10-16(14)23(21(19)25)17-11-5-6-12-26-17/h1-4,7-10,17H,5-6,11-12H2,(H,22,24)/b19-18+	17	81	O=C1Nc2ccccc2/C1=C1\C(=O)N(C2CCCCO2)c2ccccc21	gamma_fused	Trypanosoma brucei rhodesiense,Trypanosoma brucei rhodesiense																									1.36
InChI=1S/C21H20N6O2S/c28-19(24-16-11-23-6-5-18(16)26-9-7-22-8-10-26)17-13-30-21(25-17)27-12-14-3-1-2-4-15(14)20(27)29/h1-6,11,13,22H,7-10,12H2,(H,24,28)/p+2	58	48	O=C(Nc1c[nH+]ccc1N1CC[NH2+]CC1)c1csc(N2Cc3ccccc3C2=O)n1	gamma_fused	Serine/threonine-protein kinase Chk1,Homo sapiens																									2
InChI=1S/C21H22N2O2/c24-20-11-10-16-6-4-5-9-19(16)23(20)18-12-14-22(15-13-18)21(25)17-7-2-1-3-8-17/h1-9,18H,10-15H2	7	114	O=C(c1ccccc1)N1CCC(N2C(=O)CCc3ccccc32)CC1	delta_fused	Vasopressin V1a receptor,Rattus norvegicus																									1.1129
InChI=1S/C21H22N4O/c26-21-16-23(11-12-25(21)19-9-5-2-6-10-19)15-20-13-22-17-24(20)14-18-7-3-1-4-8-18/h1-10,13,17H,11-12,14-16H2/p+1	185	22	O=C1C[NH+](Cc2cncn2Cc2ccccc2)CCN1c1ccccc1	delta_single	MCF7,Homo sapiens	Protein farnesyltransferase,Bos taurus	Protein farnesyltransferase,Homo sapiens	Rat1,Rattus norvegicus																						4.16514	1.45	1.06373	1.66667
InChI=1S/C21H23NO/c23-20-14-13-19(17-7-3-1-4-8-17)21(18-9-5-2-6-10-18)22(20)15-16-11-12-16/h1-10,16,19,21H,11-15H2	54	50	O=C1CCC(c2ccccc2)C(c2ccccc2)N1CC1CC1	delta_single	Cytochrome P450 3A4,Homo sapiens	SJSA-1,Homo sapiens	p53-binding protein Mdm-2,Homo sapiens																							3.59245	1.0315	1.16413
InChI=1S/C21H23NO/c23-20-15-17-11-7-8-14-19(17)21(16-9-3-1-4-10-16)22(20)18-12-5-2-6-13-18/h1,3-4,7-11,14,18,21H,2,5-6,12-13,15H2	143	26	O=C1Cc2ccccc2C(c2ccccc2)N1C1CCCCC1	delta_fused	p53-binding protein Mdm-2,Homo sapiens																									1.09565
InChI=1S/C22H16N2O/c25-22-17-11-5-4-10-16(17)21-14-19(15-8-2-1-3-9-15)23-18-12-6-7-13-20(18)24(21)22/h1-13,21H,14H2	23	73	O=C1c2ccccc2C2CC(c3ccccc3)=Nc3ccccc3N12	gamma_fused	A498,Homo sapiens	ACHN,Homo sapiens	CCRF-CEM,Homo sapiens	COLO 205,Homo sapiens	DU-145,Homo sapiens	HCT-116,Homo sapiens	HCT-15,Homo sapiens	HL-60,Homo sapiens	HOP-62,Homo sapiens	Human immunodeficiency virus 1,Human immunodeficiency virus 1	IGROV-1,Homo sapiens	M14,Homo sapiens	MCF7,Homo sapiens	MDA-MB-435,Homo sapiens	MOLT-4,Homo sapiens	NCI-H460,Homo sapiens	OVCAR-3,Homo sapiens	OVCAR-5,Homo sapiens	PC-3,Homo sapiens	RPMI-8226,Homo sapiens	SF-268,Homo sapiens	SK-OV-3,Homo sapiens	SR,Homo sapiens	SW-620,Homo sapiens		1.25	1.375	2	5.57143	8.8	4.6129	1.8	9.33333	1.71429	1.54167	1.33333	3.4	4.16514	2.5	1.5	4.27273	1.75	1.75	5.2973	1.33333
InChI=1S/C22H17NO/c24-22-21(18-12-6-2-7-13-18)20(17-10-4-1-5-11-17)16-23(22)19-14-8-3-9-15-19/h1-15H,16H2	94	34	O=C1C(c2ccccc2)=C(c2ccccc2)CN1c1ccccc1	gamma_single	Cyclooxygenase-2,Homo sapiens																									1.02941
InChI=1S/C22H18N2O/c25-21-15-23-22(18-11-5-2-6-12-18)19-13-7-8-14-20(19)24(21)16-17-9-3-1-4-10-17/h1-14H,15-16H2	156	25	O=C1CN=C(c2ccccc2)c2ccccc2N1Cc1ccccc1	epsilon_fused	G protein-coupled receptor 44,Homo sapiens																									1.08333
InChI=1S/C22H19NOS/c24-22-15-21(18-11-5-2-6-12-18)25-20-14-8-7-13-19(20)23(22)16-17-9-3-1-4-10-17/h1-14,21H,15-16H2	168	24	O=C1CC(c2ccccc2)Sc2ccccc2N1Cc1ccccc1	epsilon_fused	Tyrosine-protein kinase ABL,Homo sapiens	Tyrosine-protein kinase receptor RET,Homo sapiens																								6	2
InChI=1S/C22H24N4O/c27-22-21(11-12-25(22)15-18-7-3-1-4-8-18)24-14-20-13-23-17-26(20)16-19-9-5-2-6-10-19/h1-10,13,17,21,24H,11-12,14-16H2/p+1	178	23	O=C1C([NH2+]Cc2cncn2Cc2ccccc2)CCN1Cc1ccccc1	gamma_single	HERG,Homo sapiens	Protein farnesyltransferase,Homo sapiens																								7.80952	1.36765
InChI=1S/C22H26N2O2/c25-22-21-10-5-4-7-18(21)17-24(22)19-11-14-23(15-12-19)13-6-16-26-20-8-2-1-3-9-20/h1-5,7-10,19H,6,11-17H2/p+1	194	21	O=C1c2ccccc2CN1C1CC[NH+](CCCOc2ccccc2)CC1	gamma_fused	Sodium channel protein type 9 subunit alpha,Mus musculus																									1.1
InChI=1S/C23H17N3O/c27-23-20-19(24-22(25-20)17-12-6-2-7-13-17)21(16-10-4-1-5-11-16)26(23)18-14-8-3-9-15-18/h1-15,21H,(H,24,25)	35	62	O=C1c2nc(-c3ccccc3)[nH]c2C(c2ccccc2)N1c1ccccc1	gamma_fused	Protein Mdm4,Homo sapiens	p53-binding protein Mdm-2,Homo sapiens																								9.2381	1.24174
InChI=1S/C23H17N3O/c27-23-21-20(16-25(24-21)18-12-6-2-7-13-18)22(17-10-4-1-5-11-17)26(23)19-14-8-3-9-15-19/h1-16,22H	31	69	O=C1c2nn(-c3ccccc3)cc2C(c2ccccc2)N1c1ccccc1	gamma_fused	Protein Mdm4,Homo sapiens	p53-binding protein Mdm-2,Homo sapiens																								1.44345	1.24174
InChI=1S/C23H18N2O2/c26-21(17-9-3-1-4-10-17)24-15-16-25-22(27)19-13-7-8-14-20(19)23(24,25)18-11-5-2-6-12-18/h1-14H,15-16H2	5	124	O=C(c1ccccc1)N1CCN2C(=O)c3ccccc3C12c1ccccc1	gamma_fused	Cannabinoid CB1 receptor,Homo sapiens	Muscarinic acetylcholine receptor M5,Homo sapiens																								1.3	1.24194
InChI=1S/C23H19N3O3/c27-19-13-7-12-18-21(19)20(23(29)25(18)15-8-3-1-4-9-15)17-14-24-26(22(17)28)16-10-5-2-6-11-16/h1-6,8-11,14,20,24H,7,12-13H2	95	34	O=C1CCCC2=C1C(c1c[nH]n(-c3ccccc3)c1=O)C(=O)N2c1ccccc1	gamma_fused	Elongation of very long chain fatty acids protein 6,Homo sapiens																									1.05091
InChI=1S/C23H19N5O/c29-23-19-10-4-5-11-20(19)24-21-12-6-7-13-22(21)28(23)16-18-15-27(26-25-18)14-17-8-2-1-3-9-17/h1-13,15,24H,14,16H2	110	30	O=C1c2ccccc2Nc2ccccc2N1Cc1cn(Cc2ccccc2)nn1	epsilon_fused	A549,Homo sapiens																									1.84737
InChI=1S/C23H19NO2/c25-23-13-11-20(17-6-2-1-3-7-17)24(23)15-16-10-12-22-19(14-16)18-8-4-5-9-21(18)26-22/h1-10,12,14,20H,11,13,15H2	89	35	O=C1CCC(c2ccccc2)N1Cc1ccc2oc3ccccc3c2c1	gamma_single	Orexin receptor 1,Homo sapiens	Orexin receptor 2,Homo sapiens																								1.28283	1.22115
InChI=1S/C23H21N3O2/c27-22(25-16-17-8-2-1-3-9-17)21-19-11-4-5-12-20(19)23(28)26(21)15-13-18-10-6-7-14-24-18/h1-12,14,21H,13,15-16H2,(H,25,27)	29	71	O=C(NCc1ccccc1)C1c2ccccc2C(=O)N1CCc1ccccn1	gamma_fused	Sodium channel protein type IX alpha subunit,Homo sapiens	Sodium channel protein type IX alpha subunit,Rattus norvegicus	Sodium channel protein type V alpha subunit,Homo sapiens																							1.10823	1.5	1.91667
InChI=1S/C23H22N2O/c26-22-15-14-21(18-9-3-1-4-10-18)23(19-11-5-2-6-12-19)25(22)17-20-13-7-8-16-24-20/h1-13,16,21,23H,14-15,17H2	187	22	O=C1CCC(c2ccccc2)C(c2ccccc2)N1Cc1ccccn1	delta_single	SJSA-1,Homo sapiens	Tumour suppressor p53/oncoprotein Mdm2,Homo sapiens																								1.0315	2.48718
InChI=1S/C23H23N3O2/c27-21(25-12-6-1-7-13-25)15-26-22(17-9-2-3-10-18(17)23(26)28)19-14-24-20-11-5-4-8-16(19)20/h2-5,8-11,14,22,24H,1,6-7,12-13,15H2	20	75	O=C(CN1C(=O)c2ccccc2C1c1c[nH]c2ccccc12)N1CCCCC1	gamma_fused	A498,Homo sapiens	ACHN,Homo sapiens	CCRF-CEM,Homo sapiens	COLO 205,Homo sapiens	DU-145,Homo sapiens	HCT-116,Homo sapiens	HCT-15,Homo sapiens	HL-60,Homo sapiens	HOP-62,Homo sapiens	Human immunodeficiency virus 1,Human immunodeficiency virus 1	IGROV-1,Homo sapiens	M14,Homo sapiens	MCF7,Homo sapiens	MDA-MB-435,Homo sapiens	MOLT-4,Homo sapiens	NCI-H460,Homo sapiens	OVCAR-3,Homo sapiens	OVCAR-5,Homo sapiens	PC-3,Homo sapiens	Plasmodium falciparum,Plasmodium falciparum	RPMI-8226,Homo sapiens	SF-268,Homo sapiens	SK-OV-3,Homo sapiens	SR,Homo sapiens	SW-620,Homo sapiens	1.25	1.375	2	5.57143	8.8	4.6129	1.8	9.33333	1.71429	1.54167	1.33333	3.4	4.16514	2.5	1.5	4.27273	1.75	1.75	5.2973	1.16492
InChI=1S/C23H25N5O3/c29-22-15-31-21-14-19-18(23(25-16-24-19)26-17-5-2-1-3-6-17)13-20(21)28(22)8-4-7-27-9-11-30-12-10-27/h1-3,5-6,13-14,16H,4,7-12,15H2,(H,24,25,26)/p+1	196	21	O=C1COc2cc3ncnc(Nc4ccccc4)c3cc2N1CCC[NH+]1CCOCC1	delta_fused	Epidermal growth factor receptor erbB1,Homo sapiens																									1.25806
InChI=1S/C23H26N2O2/c26-21-14-8-7-13-19-15-16-20(25(19)21)23(27)24-22(17-9-3-1-4-10-17)18-11-5-2-6-12-18/h1-6,9-12,19-20,22H,7-8,13-16H2,(H,24,27)	41	60	O=C(NC(c1ccccc1)c1ccccc1)C1CCC2CCCCC(=O)N21	epsilon_fused	Inhibitor of apoptosis protein 3,Homo sapiens	MDA-MB-231,Homo sapiens																								2.20661	1.10283
InChI=1S/C23H27N3O/c27-23-20-14-24-26(19-5-2-1-3-6-19)21(20)7-4-8-25(23)22-17-10-15-9-16(12-17)13-18(22)11-15/h1-3,5-6,14-18,22H,4,7-13H2	103	32	O=C1c2cnn(-c3ccccc3)c2CCCN1C1C2CC3CC(C2)CC1C3	epsilon_fused	11-beta-hydroxysteroid dehydrogenase 1,Homo sapiens	11-beta-hydroxysteroid dehydrogenase 1,Mus musculus																								1.21212	1.07895
InChI=1S/C23H27N3O2/c27-22-12-7-13-26(22)21(18-19-8-3-1-4-9-19)23(28)25-16-14-24(15-17-25)20-10-5-2-6-11-20/h1-6,8-11,21H,7,12-18H2	43	59	O=C(C(Cc1ccccc1)N1CCCC1=O)N1CCN(c2ccccc2)CC1	gamma_single	Cytochrome P450 3A4,Homo sapiens	Melanocortin receptor 4,Homo sapiens																								1.53336	1.33333
InChI=1S/C24H20N2O3S/c27-22(25-30(29)21-12-5-2-6-13-21)15-14-19-10-7-11-20-16-23(28)26(24(19)20)17-18-8-3-1-4-9-18/h1-15,30H,16-17H2/b15-14+	84	36	O=C(/C=C/c1cccc2c1N(Cc1ccccc1)C(=O)C2)N=[SH](=O)c1ccccc1	gamma_fused	Prostanoid EP3 receptor,Homo sapiens	Rattus norvegicus,Rattus norvegicus																								1.05	2.39726
InChI=1S/C24H23NO/c26-24-22(18-10-13-19-11-4-1-5-12-19)23(20-14-6-2-7-15-20)25(24)21-16-8-3-9-17-21/h1-9,11-12,14-17,22-23H,10,13,18H2	111	30	O=C1C(CCCc2ccccc2)C(c2ccccc2)N1c1ccccc1	beta_single	Cannabinoid CB1 receptor,Homo sapiens	Mus musculus,Mus musculus	Rattus norvegicus,Rattus norvegicus	Solute carrier organic anion transporter family member 1B1,Homo sapiens																						1.3	1.96154	2.39726	1.44444
InChI=1S/C24H24N2O3S/c27-22(25-30(29)21-12-5-2-6-13-21)15-14-19-10-7-11-20-16-23(28)26(24(19)20)17-18-8-3-1-4-9-18/h1-6,8-9,12-15,20,30H,7,10-11,16-17H2/b15-14+	98	33	O=C(/C=C/C1=C2C(CCC1)CC(=O)N2Cc1ccccc1)N=[SH](=O)c1ccccc1	gamma_fused	Prostanoid EP3 receptor,Homo sapiens																									1.05
InChI=1S/C24H25N5O4/c30-19-11-29-23(32)22(33-24(29)18-5-2-6-28(18)19)27-21(31)13-7-15-14-3-1-4-16-20(14)12(9-25-16)8-17(15)26-10-13/h1,3-4,7,9,13,17-18,22,24-26H,2,5-6,8,10-11H2,(H,27,31)/p+1	144	26	O=C(NC1OC2C3CCCN3C(=O)CN2C1=O)C1C=C2c3cccc4[nH]cc(c34)CC2[NH2+]C1	delta_fused	Alpha-1d adrenergic receptor,Homo sapiens	Alpha-2a adrenergic receptor,Homo sapiens	Alpha-2b adrenergic receptor,Homo sapiens	Alpha-2c adrenergic receptor,Homo sapiens	Dopamine D2 receptor,Homo sapiens	Dopamine D3 receptor,Homo sapiens	Rattus norvegicus,Rattus norvegicus	Serotonin 1a (5-HT1a) receptor,Rattus norvegicus	Serotonin 1b (5-HT1b) receptor,Rattus norvegicus	Serotonin 2a (5-HT2a) receptor,Homo sapiens	Serotonin 2b (5-HT2b) receptor,Homo sapiens	Serotonin 2c (5-HT2c) receptor,Homo sapiens	Serotonin 6 (5-HT6) receptor,Homo sapiens													1.33333	2	2	2	1.6	1.16667	2.39726	1.1	1.5	1.5	2.2	1.5	2.33333
InChI=1S/C25H20N2O2/c28-24-22(18-12-4-6-14-20(18)26-24)23-19-13-5-7-15-21(19)27(25(23)29)16-8-11-17-9-2-1-3-10-17/h1-7,9-10,12-15H,8,11,16H2,(H,26,28)/b23-22+	10	94	O=C1Nc2ccccc2/C1=C1\C(=O)N(CCCc2ccccc2)c2ccccc21	gamma_fused	Rho-associated protein kinase 2,Homo sapiens																									1.66667
InChI=1S/C25H21N3O/c29-25-23-21(22(26-27-23)19-12-6-2-7-13-19)24(20-14-8-3-9-15-20)28(25)17-16-18-10-4-1-5-11-18/h1-15,24H,16-17H2,(H,26,27)	18	78	O=C1c2[nH]nc(-c3ccccc3)c2C(c2ccccc2)N1CCc1ccccc1	gamma_fused	A498,Homo sapiens	ACHN,Homo sapiens	CCRF-CEM,Homo sapiens	COLO 205,Homo sapiens	DU-145,Homo sapiens	HCT-116,Homo sapiens	HL-60,Homo sapiens	HOP-62,Homo sapiens	Human immunodeficiency virus 1,Human immunodeficiency virus 1	IGROV-1,Homo sapiens	M14,Homo sapiens	MCF7,Homo sapiens	MDA-MB-435,Homo sapiens	MOLT-4,Homo sapiens	NCI-H460,Homo sapiens	OVCAR-3,Homo sapiens	OVCAR-5,Homo sapiens	PC-3,Homo sapiens	RPMI-8226,Homo sapiens	SF-268,Homo sapiens	SK-OV-3,Homo sapiens	SR,Homo sapiens	SW-620,Homo sapiens			1.25	1.375	2	5.57143	8.8	4.6129	9.33333	1.71429	1.54167	1.33333	3.4	4.16514	2.5	1.5	4.27273	1.75	1.75	5.2973	1.33333	5.8
InChI=1S/C25H22N2O5S/c28-24-22-15-21(11-12-23(22)26(25(24)29)16-18-7-3-1-4-8-18)33(30,31)27-14-13-19(27)17-32-20-9-5-2-6-10-20/h1-12,15,19H,13-14,16-17H2	55	50	O=C1C(=O)N(Cc2ccccc2)c2ccc(S(=O)(=O)N3CCC3COc3ccccc3)cc21	gamma_fused	Caspase-3,Homo sapiens	Caspase-7,Homo sapiens																								1.3046	1.11579
InChI=1S/C25H23N3O5S/c29-24-22-14-21(10-11-23(22)27(25(24)30)16-18-6-2-1-3-7-18)34(31,32)28-13-5-8-19(28)17-33-20-9-4-12-26-15-20/h1-4,6-7,9-12,14-15,19H,5,8,13,16-17H2	69	41	O=C1C(=O)N(Cc2ccccc2)c2ccc(S(=O)(=O)N3CCCC3COc3cccnc3)cc21	gamma_fused	Caspase-3,Homo sapiens	Caspase-7,Homo sapiens																								1.3046	1.11579
InChI=1S/C25H23NO2/c27-24-22-13-7-8-14-23(22)25(28-18-20-15-16-20,21-11-5-2-6-12-21)26(24)17-19-9-3-1-4-10-19/h1-14,20H,15-18H2	44	58	O=C1c2ccccc2C(OCC2CC2)(c2ccccc2)N1Cc1ccccc1	gamma_fused	Tumour suppressor p53/oncoprotein Mdm2,Homo sapiens																									1.3265
InChI=1S/C25H24N4O4/c30-22-12-28(15-7-8-26-11-15)25(31)19-10-17-16-3-1-2-4-18(16)27-23(17)24(29(19)22)14-5-6-20-21(9-14)33-13-32-20/h1-6,9,15,19,24,26-27H,7-8,10-13H2/p+1	117	29	O=C1C2Cc3c([nH]c4ccccc34)C(c3ccc4c(c3)OCO4)N2C(=O)CN1C1CC[NH2+]C1	delta_fused	Phosphodiesterase 11A,Homo sapiens	Phosphodiesterase 5A,Bos taurus	Phosphodiesterase 5A,Homo sapiens																							1.09091	1.25	1.25
InChI=1S/C25H25N5O3S/c31-22-15-20-18(30(22)25-27-17-9-4-5-11-21(17)34-25)12-14-28(20)23(32)19-10-6-13-29(19)24(33)26-16-7-2-1-3-8-16/h1-5,7-9,11,18-20H,6,10,12-15H2,(H,26,33)	126	28	O=C(Nc1ccccc1)N1CCCC1C(=O)N1CCC2C1CC(=O)N2c1nc2ccccc2s1	gamma_fused	Human herpes virus 5 capsid protein P40,Human cytomegalovirus (strain AD169) (HHV-5) (Human herpesvirus 5)																									1.96731
InChI=1S/C25H26N2OS/c28-25-21(16-23-26-13-14-29-23)15-22(19-7-3-1-4-8-19)24(20-9-5-2-6-10-20)27(25)17-18-11-12-18/h1-10,13-14,18,21-22,24H,11-12,15-17H2	90	35	O=C1C(Cc2nccs2)CC(c2ccccc2)C(c2ccccc2)N1CC1CC1	delta_single	Cytochrome P450 3A4,Homo sapiens	HCT-116,Homo sapiens	SJSA-1,Homo sapiens	p53-binding protein Mdm-2,Homo sapiens																						4.08233	4.6129	1.0315	1.24174
InChI=1S/C26H20N6O4S4/c33-17-15-29-21(35)25(39-37-15)9-23(11-5-1-3-7-13(11)27-19(23)31(17)25)24-10-26-22(36)30-16(38-40-26)18(34)32(26)20(24)28-14-8-4-2-6-12(14)24/h1-8,15-16,19-20,27-28H,9-10H2,(H,29,35)(H,30,36)	145	26	O=C1C2NC(=O)C3(CC4(C56CC78SSC(NC7=O)C(=O)N8C5Nc5ccccc56)c5ccccc5NC4N13)SS2	delta_fused	A2780,Homo sapiens	A549,Homo sapiens	BGC-823,Homo sapiens	Bel-7402,Homo sapiens	HCT-8,Homo sapiens	Histone-lysine N-methyltransferase SUV39H1,Homo sapiens	Histone-lysine N-methyltransferase, H3 lysine-9 specific 3,Homo sapiens	Jurkat,Homo sapiens	Trypanosoma brucei brucei,Trypanosoma brucei brucei																	2.5	18.4737	8.5	9	17	1.5	3.16667	2	3
InChI=1S/C26H24N2O5S/c29-25-23-16-22(13-14-24(23)27(26(25)30)17-19-8-3-1-4-9-19)34(31,32)28-15-7-10-20(28)18-33-21-11-5-2-6-12-21/h1-6,8-9,11-14,16,20H,7,10,15,17-18H2	21	75	O=C1C(=O)N(Cc2ccccc2)c2ccc(S(=O)(=O)N3CCCC3COc3ccccc3)cc21	gamma_fused	Caspase-3,Homo sapiens	Caspase-7,Homo sapiens																								1.3046	1.11579
InChI=1S/C26H25N3O4S/c1-19-24-15-23(11-12-25(24)28(26(19)30)17-20-7-3-2-4-8-20)34(31,32)29-14-6-9-21(29)18-33-22-10-5-13-27-16-22/h2-5,7-8,10-13,15-16,21H,1,6,9,14,17-18H2	157	25	C=C1C(=O)N(Cc2ccccc2)c2ccc(S(=O)(=O)N3CCCC3COc3cccnc3)cc21	gamma_fused	Caspase-3,Homo sapiens	Caspase-6,Homo sapiens	Caspase-7,Homo sapiens																							1.3046	3.77778	1.11579
InChI=1S/C26H25NO2/c28-26-25-14-13-24(16-22(25)17-27(26)23-11-4-5-12-23)29-18-19-7-6-10-21(15-19)20-8-2-1-3-9-20/h1-3,6-10,13-16,23H,4-5,11-12,17-18H2	56	49	O=C1c2ccc(OCc3cccc(-c4ccccc4)c3)cc2CN1C1CCCC1	gamma_fused	Alpha-1a adrenergic receptor,Homo sapiens	Cytochrome P450 2C9,Homo sapiens	Histamine H1 receptor,Homo sapiens																							1.16667	5	3.5
InChI=1S/C27H21N3O4/c31-24-14-29(17-6-2-1-3-7-17)27(32)21-13-19-18-8-4-5-9-20(18)28-25(19)26(30(21)24)16-10-11-22-23(12-16)34-15-33-22/h1-12,21,26,28H,13-15H2	188	22	O=C1C2Cc3c([nH]c4ccccc34)C(c3ccc4c(c3)OCO4)N2C(=O)CN1c1ccccc1	delta_fused	Phosphodiesterase 5A,Bos taurus																									1.25
InChI=1S/C27H24N2O3/c30-27-22(18-29(27)24-11-5-2-6-12-24)16-20-8-7-13-25(17-20)31-15-14-23-19-32-26(28-23)21-9-3-1-4-10-21/h1-13,17,19,22H,14-16,18H2	91	35	O=C1C(Cc2cccc(OCCc3coc(-c4ccccc4)n3)c2)CN1c1ccccc1	beta_single	Cytochrome P450 2C9,Homo sapiens	Peroxisome proliferator-activated receptor alpha,Homo sapiens	Peroxisome proliferator-activated receptor gamma,Homo sapiens																							10	1.14583	1.4
InChI=1S/C27H24N4O2/c32-25-18-30-27(22-12-5-2-6-13-22,20-33-26-28-16-9-17-29-26)23-14-7-8-15-24(23)31(25)19-21-10-3-1-4-11-21/h1-17,30H,18-20H2/p+1	11	94	O=C1C[NH2+]C(COc2ncccn2)(c2ccccc2)c2ccccc2N1Cc1ccccc1	epsilon_fused	Endothelin receptor ET-A,Homo sapiens	Endothelin receptor ET-B,Homo sapiens																								1.06557	1.16071
InChI=1S/C27H26N2O4S/c1-20-25-17-24(14-15-26(25)28(27(20)30)18-21-9-4-2-5-10-21)34(31,32)29-16-8-11-22(29)19-33-23-12-6-3-7-13-23/h2-7,9-10,12-15,17,22H,1,8,11,16,18-19H2	158	25	C=C1C(=O)N(Cc2ccccc2)c2ccc(S(=O)(=O)N3CCCC3COc3ccccc3)cc21	gamma_fused	Caspase-3,Homo sapiens	Caspase-6,Homo sapiens	Caspase-7,Homo sapiens																							1.3046	3.02222	1.11579
InChI=1S/C27H28N2O/c30-27-23(17-24-13-7-8-16-28-24)18-25(21-9-3-1-4-10-21)26(22-11-5-2-6-12-22)29(27)19-20-14-15-20/h1-13,16,20,23,25-26H,14-15,17-19H2	127	28	O=C1C(Cc2ccccn2)CC(c2ccccc2)C(c2ccccc2)N1CC1CC1	delta_single	Cytochrome P450 3A4,Homo sapiens	SJSA-1,Homo sapiens	p53-binding protein Mdm-2,Homo sapiens																							3.59245	1.0315	1.24174
InChI=1S/C27H35N3O2/c31-26-14-8-18-30(26)25(16-15-21-9-3-1-4-10-21)27(32)29-24(20-23-13-7-17-28-23)19-22-11-5-2-6-12-22/h1-6,9-12,23-25,28H,7-8,13-20H2,(H,29,32)/p+1	171	24	O=C(NC(Cc1ccccc1)CC1CCC[NH2+]1)C(CCc1ccccc1)N1CCCC1=O	gamma_single	Beta-secretase 1,Homo sapiens																									1.15254
InChI=1S/C28H22N2O3S/c31-26(29-34(33)25-11-2-1-3-12-25)16-15-22-9-6-10-24-18-27(32)30(28(22)24)19-20-13-14-21-7-4-5-8-23(21)17-20/h1-17,34H,18-19H2/b16-15+	85	36	O=C(/C=C/c1cccc2c1N(Cc1ccc3ccccc3c1)C(=O)C2)N=[SH](=O)c1ccccc1	gamma_fused	Prostanoid EP3 receptor,Homo sapiens	Rattus norvegicus,Rattus norvegicus																								1.05	2.39726
InChI=1S/C28H28N2O2/c31-27(29-21-14-6-2-7-15-21)25-23-18-10-11-19-24(23)28(32)30(22-16-8-3-9-17-22)26(25)20-12-4-1-5-13-20/h1-2,4-7,10-15,18-19,22,25-26H,3,8-9,16-17H2,(H,29,31)	24	73	O=C(Nc1ccccc1)C1c2ccccc2C(=O)N(C2CCCCC2)C1c1ccccc1	delta_fused	A498,Homo sapiens	ACHN,Homo sapiens	CCRF-CEM,Homo sapiens	COLO 205,Homo sapiens	DU-145,Homo sapiens	HL-60,Homo sapiens	HOP-62,Homo sapiens	M14,Homo sapiens	MCF7,Homo sapiens	MDA-MB-435,Homo sapiens	NCI-H460,Homo sapiens	OVCAR-3,Homo sapiens	OVCAR-5,Homo sapiens	PC-3,Homo sapiens	SF-268,Homo sapiens	SK-OV-3,Homo sapiens	SW-620,Homo sapiens									1.25	1.375	2	5.57143	8.8	9.33333	1.71429	3.4	4.16514	2.5	4.27273	1.75	1.75	5.2973	5.8	1.46154	1.16667
InChI=1S/C28H31N3O2/c32-27-15-8-18-31(27)26-14-7-13-24(20-26)28(33)30-25(19-22-9-3-1-4-10-22)16-17-29-21-23-11-5-2-6-12-23/h1-7,9-14,20,25,29H,8,15-19,21H2,(H,30,33)/p+1	25	73	O=C(NC(CC[NH2+]Cc1ccccc1)Cc1ccccc1)c1cccc(N2CCCC2=O)c1	gamma_single	Plasmodium falciparum,Plasmodium falciparum																									1.94154
InChI=1S/C28H32N2O4/c31-28-19-29-18-26(22-33-21-24-10-5-2-6-11-24)30(28)25-12-14-27(15-13-25)34-17-7-16-32-20-23-8-3-1-4-9-23/h1-6,8-15,26,29H,7,16-22H2/p+1	146	26	O=C1C[NH2+]CC(COCc2ccccc2)N1c1ccc(OCCCOCc2ccccc2)cc1	delta_single	Cytochrome P450 3A4,Homo sapiens																									8.98113
InChI=1S/C28H33N5O2/c34-27-20-35-26-10-5-4-9-25(26)33(27)22-12-17-31(18-13-22)15-6-16-32-24-11-14-29-19-23(24)28(30-32)21-7-2-1-3-8-21/h1-5,7-10,22,29H,6,11-20H2/p+1	133	27	O=C1COc2ccccc2N1C1CC[NH+](CCCn2nc(-c3ccccc3)c3c2CCNC3)CC1	delta_fused	Alpha-1a adrenergic receptor,Homo sapiens	Cathepsin S,Homo sapiens																								2.33333	1.27119
InChI=1S/C29H30N2O2/c32-27(30-25-14-8-3-9-15-25)19-24-18-26(22-10-4-1-5-11-22)28(23-12-6-2-7-13-23)31(29(24)33)20-21-16-17-21/h1-15,21,24,26,28H,16-20H2,(H,30,32)	147	26	O=C(CC1CC(c2ccccc2)C(c2ccccc2)N(CC2CC2)C1=O)Nc1ccccc1	delta_single	SJSA-1,Homo sapiens	p53-binding protein Mdm-2,Homo sapiens																								1.0315	1.24174
InChI=1S/C29H38N4O3/c34-27(31-24-12-5-2-6-13-24)21-30-17-16-25(19-22-9-3-1-4-10-22)32-29(36)23-11-7-14-26(20-23)33-18-8-15-28(33)35/h1,3-4,7,9-11,14,20,24-25,30H,2,5-6,8,12-13,15-19,21H2,(H,31,34)(H,32,36)/p+1	112	30	O=C(C[NH2+]CCC(Cc1ccccc1)NC(=O)c1cccc(N2CCCC2=O)c1)NC1CCCCC1	gamma_single	Beta secretase 2,Homo sapiens																									1.71818
InChI=1S/C30H25N5O4/c36-26(31-21-12-4-1-5-13-21)20-34-24-18-10-11-19-25(24)35(23-16-8-3-9-17-23)29(38)27(28(34)37)33-30(39)32-22-14-6-2-7-15-22/h1-19,27H,20H2,(H,31,36)(H2,32,33,39)	134	27	O=C(CN1C(=O)C(NC(=O)Nc2ccccc2)C(=O)N(c2ccccc2)c2ccccc21)Nc1ccccc1	epsilon_fused	Cholecystokinin A receptor,Rattus norvegicus	Cholecystokinin B receptor,Homo sapiens																								1.57895	1.53333
InChI=1S/C30H32N4O2/c35-28-12-7-17-34(28)27-20-25(19-24-13-16-32-29(24)27)30(36)33-26(18-22-8-3-1-4-9-22)14-15-31-21-23-10-5-2-6-11-23/h1-6,8-11,13,16,19-20,26,31-32H,7,12,14-15,17-18,21H2,(H,33,36)/p+1	70	41	O=C(NC(CC[NH2+]Cc1ccccc1)Cc1ccccc1)c1cc(N2CCCC2=O)c2[nH]ccc2c1	gamma_single	Beta-secretase 1,Homo sapiens	Plasmodium falciparum,Plasmodium falciparum																								1.15254	2.32984
InChI=1S/C30H35N3O4/c34-30-20-31-19-26(22-37-28-12-9-24-8-4-15-32-29(24)18-28)33(30)25-10-13-27(14-11-25)36-17-5-16-35-21-23-6-2-1-3-7-23/h1-3,6-7,9-14,18,26,31-32H,4-5,8,15-17,19-22H2/p+1	159	25	O=C1C[NH2+]CC(COc2ccc3c(c2)NCCC3)N1c1ccc(OCCCOCc2ccccc2)cc1	delta_single	Cytochrome P450 3A4,Homo sapiens	Renin,Homo sapiens																								8.29028	1.09804
InChI=1S/C31H25N5O3/c37-29(32-21-11-3-1-4-12-21)20-35-27-17-9-10-18-28(27)36(22-13-5-2-6-14-22)31(39)24(30(35)38)19-26-23-15-7-8-16-25(23)33-34-26/h1-18,24H,19-20H2,(H,32,37)(H,33,34)	82	37	O=C(CN1C(=O)C(Cc2n[nH]c3ccccc23)C(=O)N(c2ccccc2)c2ccccc21)Nc1ccccc1	epsilon_fused	Cholecystokinin A receptor,Homo sapiens																									1.00733
InChI=1S/C31H30N4O2/c36-28-20-34(23-15-16-33(19-23)18-21-9-3-1-4-10-21)31(37)27-17-25-24-13-7-8-14-26(24)32-29(25)30(35(27)28)22-11-5-2-6-12-22/h1-14,23,27,30,32H,15-20H2/p+1	148	26	O=C1C2Cc3c([nH]c4ccccc34)C(c3ccccc3)N2C(=O)CN1C1CC[NH+](Cc2ccccc2)C1	delta_fused	Plasmodium falciparum,Plasmodium falciparum																									1.74738
InChI=1S/C31H31N5O4/c37-27(19-13-21-20-8-4-9-22-26(20)18(15-32-22)14-23(21)33-16-19)34-28-30(39)36-25(12-17-6-2-1-3-7-17)29(38)35-11-5-10-24(35)31(36)40-28/h1-4,6-9,13,15,19,23-25,28,31-33H,5,10-12,14,16H2,(H,34,37)/p+1	149	26	O=C(NC1OC2C3CCCN3C(=O)C(Cc3ccccc3)N2C1=O)C1C=C2c3cccc4[nH]cc(c34)CC2[NH2+]C1	delta_fused	Alpha-1d adrenergic receptor,Homo sapiens	Alpha-2a adrenergic receptor,Homo sapiens	Alpha-2b adrenergic receptor,Homo sapiens	Alpha-2c adrenergic receptor,Homo sapiens	Dopamine D2 receptor,Homo sapiens	Dopamine D3 receptor,Homo sapiens	Serotonin 1a (5-HT1a) receptor,Rattus norvegicus	Serotonin 1b (5-HT1b) receptor,Rattus norvegicus	Serotonin 2a (5-HT2a) receptor,Homo sapiens	Serotonin 2b (5-HT2b) receptor,Homo sapiens	Serotonin 2c (5-HT2c) receptor,Homo sapiens	Serotonin 6 (5-HT6) receptor,Homo sapiens														1.33333	2	2	2	1.6	1.16667	1.1	1.5	1.5	2.2	1.5	2.33333
InChI=1S/C32H37N3O2/c36-30-22-24(20-21-33-23-25-10-4-1-5-11-25)16-17-28-18-19-29(35(28)30)32(37)34-31(26-12-6-2-7-13-26)27-14-8-3-9-15-27/h1-15,24,28-29,31,33H,16-23H2,(H,34,37)/p+1	42	60	O=C(NC(c1ccccc1)c1ccccc1)C1CCC2CCC(CC[NH2+]Cc3ccccc3)CC(=O)N21	epsilon_fused	Baculoviral IAP repeat-containing protein 2,Homo sapiens	Inhibitor of apoptosis protein 3,Homo sapiens																								1.21212	2.31169
InChI=1S/C33H39N5O4S/c39-29(36-27(19-26-13-7-15-34-21-26)31(41)32-35-16-18-43-32)22-38-28(20-25-11-5-2-6-12-25)33(42)37(23-30(38)40)17-8-14-24-9-3-1-4-10-24/h1-6,9-12,16,18,26-28,34H,7-8,13-15,17,19-23H2,(H,36,39)	135	27	O=C(CN1C(=O)CN(CCCc2ccccc2)C(=O)C1Cc1ccccc1)NC(CC1CCCNC1)C(=O)c1nccs1	delta_single	Thrombin,Homo sapiens																									2.47826
InChI=1S/C34H30N4O2/c39-34-33-28(21-32(40-33)24-7-2-1-3-8-24)19-27-20-29(37-17-15-35-16-18-37)12-13-31(27)38(34)23-26-9-4-5-11-30(26)25-10-6-14-36-22-25/h1-14,20-22,35H,15-19,23H2/p+1	136	27	O=C1c2oc(-c3ccccc3)cc2Cc2cc(N3CC[NH2+]CC3)ccc2N1Cc1ccccc1-c1cccnc1	epsilon_fused	MAP kinase-activated protein kinase 2,Homo sapiens																									1.3125
InChI=1S/C5H7NO3S/c7-4-3-5-6(4)1-2-10(5,8)9/h5H,1-3H2	3	128	O=C1CC2N1CCS2(=O)=O	beta_fused	Bacillus licheniformis,Bacillus licheniformis	Beta-lactamase,Bacillus licheniformis	Beta-lactamase,Citrobacter freundii	Beta-lactamase,Staphylococcus aureus	Beta-lactamase L1,Stenotrophomonas maltophilia	Beta-lactamase OXA-1,Escherichia coli	Leukocyte elastase,Homo sapiens																			1.11111	1.5	2	2.4	2	1.5	1.03526
InChI=1S/C6H7NO3S/c8-5-4-6-7(5)2-1-3-11(6,9)10/h1-2,6H,3-4H2	49	54	O=C1CC2N1C=CCS2(=O)=O	beta_fused	Cricetinae gen. sp.,Cricetinae gen. sp.	Leukocyte elastase,Homo sapiens	Pancreatic elastase,Sus scrofa																							1.31579	1.2571	1.66667
InChI=1S/C8H10N4O3S/c13-7-3-8-12(7)5-6(16(8,14)15)4-11-2-1-9-10-11/h1-2,6,8H,3-5H2	71	41	O=C1CC2N1CC(Cn1ccnn1)S2(=O)=O	beta_fused	Bacterial beta-lactamase TEM,Bacteria	Beta-lactamase,Bacillus licheniformis	Beta-lactamase,Citrobacter freundii	Beta-lactamase,Staphylococcus aureus	Beta-lactamase AmpC,Escherichia coli K-12	Beta-lactamase SCO-1,Escherichia coli	Beta-lactamase SHV-1,Escherichia coli	Beta-lactamase TEM,Enterobacter cloacae	Beta-lactamase TEM,Escherichia coli	Class D beta-lactamase,Brachyspira pilosicoli																2	3	2	4.8	1.57143	2	1.1	2	1.97872	2
InChI=1S/C8H13N3O2/c12-7-1-4-11(7)8(13)10-5-2-9-3-6-10/h9H,1-6H2	198	21	O=C1CCN1C(=O)N1CCNCC1	beta_single	Coagulation factor XI,Homo sapiens	Plasminogen,Rattus norvegicus	Trypsin I,Bos taurus	Trypsin I,Homo sapiens	Urokinase-type plasminogen activator,Homo sapiens																					5	1.5	1.7931	2.61364	2.66667
[truncated: 30 more columns]

## Sheet: active scaffolds_frequency <20
Murcko (InChI Code)	ScaffID	Frequency	Murcko	Class	Target 1	Target 2	Target 3	Target 4	Target 5	Target 6	Target 7	Target 8	Target 9	Target 10	EF Target 1	EF Target 2	EF Target 3	EF Target 4	EF Target 5	EF Target 6	EF Target 7	EF Target 8	EF Target 9	EF Target 10	n, Target 1	n, Target 2	n, Target 3	n, Target 4	n, Target 5	n, Target 6	n, Target 7	n, Target 8	n, Target 9	n, Target 10
InChI=1S/C10H10N2O/c13-10-5-3-7-12(10)8-9-4-1-2-6-11-9/h1-6H,7-8H2	3380	1	O=C1C=CCN1Cc1ccccn1	gamma_single	Aldose reductase,Homo sapiens										2.71429										1
InChI=1S/C10H11N5O5S2/c1-5-8(17)15-2-6(22(18,19)9(5)15)3-20-7(16)4-21-10-11-13-14-12-10/h6,9H,1-4H2,(H,11,12,13,14)	3383	1	C=C1C(=O)N2CC(COC(=O)CSc3nnn[nH]3)S(=O)(=O)C12	beta_fused	Beta-lactamase,Staphylococcus aureus										4.8										1
InChI=1S/C10H12N2O2S/c13-8-5-9-12(8)7(6-15-9)10(14)11-3-1-2-4-11/h6,9H,1-5H2	3384	1	O=C(C1=CSC2CC(=O)N12)N1CCCC1	beta_fused	Signal peptidase I,Escherichia coli K-12										2.3125										1
InChI=1S/C10H14N2O4S/c13-8-5-9-12(8)7(6-17(9,15)16)10(14)11-3-1-2-4-11/h7,9H,1-6H2	3387	1	O=C(C1CS(=O)(=O)C2CC(=O)N12)N1CCCC1	beta_fused	Leukocyte elastase,Homo sapiens										3.10577										1
InChI=1S/C10H16N2O2/c13-9-6-7-12(9)10(14)11-8-4-2-1-3-5-8/h8H,1-7H2,(H,11,14)	3389	1	O=C1CCN1C(=O)NC1CCCCC1	beta_single	Tryptase,Homo sapiens										1.07059										1
InChI=1S/C10H9NO2/c12-9-6-7-11(9)10(13)8-4-2-1-3-5-8/h1-5H,6-7H2	3390	1	O=C1CCN1C(=O)c1ccccc1	beta_single	Tryptase,Homo sapiens										1.07059										1
InChI=1S/C11H10N2O3S/c14-10-9(7-8-3-1-2-4-12-8)11-13(10)5-6-17(11,15)16/h1-4,7,11H,5-6H2/b9-7-	3393	1	O=C1/C(=C/c2ccccn2)C2N1CCS2(=O)=O	beta_fused	Beta-lactamase,Staphylococcus aureus										4.8										1
InChI=1S/C11H11NO3/c13-10-6-7-12(10)11(14)15-8-9-4-2-1-3-5-9/h1-5H,6-8H2	3397	1	O=C1CCN1C(=O)OCc1ccccc1	beta_single	Leukocyte elastase,Homo sapiens										3.10577										1
InChI=1S/C11H12N2OS/c14-10-7-4-8-13(10)11(15)12-9-5-2-1-3-6-9/h1-3,5-6H,4,7-8H2,(H,12,15)	3403	1	O=C1CCCN1C(=S)Nc1ccccc1	gamma_single	Human immunodeficiency virus 1,Human immunodeficiency virus 1										1.54167										1
InChI=1S/C11H14N2O/c14-11-10-2-1-5-12(10)6-7-13(11)8-9-3-4-9/h1-2,5,9H,3-4,6-8H2	3404	1	O=C1c2cccn2CCN1CC1CC1	delta_fused	Metabotropic glutamate receptor 1,Rattus norvegicus										1.33333										1
InChI=1S/C11H14N2O4S/c14-9-7-10-13(9)8(3-6-18(10,16)17)11(15)12-4-1-2-5-12/h3,10H,1-2,4-7H2	3406	1	O=C(C1=CCS(=O)(=O)C2CC(=O)N12)N1CCCC1	beta_fused	Cricetinae gen. sp.,Cricetinae gen. sp.										1.84211										1
InChI=1S/C11H17NO/c13-11-7-4-8-12(11)9-10-5-2-1-3-6-10/h4,7,10H,1-3,5-6,8-9H2	3411	1	O=C1C=CCN1CC1CCCCC1	gamma_single	Aldose reductase,Homo sapiens										2.71429										1
InChI=1S/C12H11N3O3/c16-10-9(13-12(18)14-10)6-15-5-7-3-1-2-4-8(7)11(15)17/h1-4,9H,5-6H2,(H2,13,14,16,18)	3419	1	O=C1NC(=O)C(CN2Cc3ccccc3C2=O)N1	gamma_fused	TNF-alpha,Homo sapiens										1.40099										1
InChI=1S/C12H11NO2S/c14-11-5-6-16-12(15)10-7-8-3-1-2-4-9(8)13(10)11/h1-4,10H,5-7H2	3421	1	O=C1SCCC(=O)N2c3ccccc3CC12	epsilon_fused	Angiotensin-converting enzyme,Rattus norvegicus										1.16667										1
InChI=1S/C12H12N2O3S2/c15-11-5-12-14(11)6-9(8-19(12,16)17)7-18-10-3-1-2-4-13-10/h1-4,6,12H,5,7-8H2	3426	1	O=C1CC2N1C=C(CSc1ccccn1)CS2(=O)=O	beta_fused	Cricetinae gen. sp.,Cricetinae gen. sp.										1.84211										1
InChI=1S/C12H13N5O2/c18-10(6-17-2-1-11(17)19)15-5-9-12-8(4-14-9)3-13-7-16-12/h3-4,7,9H,1-2,5-6H2,(H,15,18)	3430	1	O=C(CN1CCC1=O)NCC1N=Cc2cncnc21	beta_single	Human immunodeficiency virus type 1 protease,Human immunodeficiency virus 1										1.04878										1
InChI=1S/C12H16N2O/c15-12-3-1-2-9-14(12)10-6-11-4-7-13-8-5-11/h4-5,7-8H,1-3,6,9-10H2	3439	1	O=C1CCCCN1CCc1ccncc1	delta_single	Integrin alpha-IIb/beta-3,Homo sapiens										1.70213										1
InChI=1S/C12H17NO2S/c14-11-5-6-16-12(15)10-7-8-3-1-2-4-9(8)13(10)11/h8-10H,1-7H2	3441	1	O=C1SCCC(=O)N2C1CC1CCCCC12	epsilon_fused	Angiotensin-converting enzyme,Rattus norvegicus										1.16667										1
InChI=1S/C12H20N4O2/c17-11-10(5-9-6-14-7-9)8-16(11)12(18)15-3-1-13-2-4-15/h9-10,13-14H,1-8H2	3445	1	O=C1C(CC2CNC2)CN1C(=O)N1CCNCC1	beta_single	Tryptase,Homo sapiens										1.07059										1
InChI=1S/C13H13N3O3/c17-13-11(19-10-4-2-1-3-5-10)6-7-16(13)8-12-15-14-9-18-12/h1-5,9,11H,6-8H2	3460	1	O=C1C(Oc2ccccc2)CCN1Cc1nnco1	gamma_single	Androgen Receptor,Homo sapiens										1.03448										1
InChI=1S/C13H13NO2S/c15-12-5-6-17-13(16)11-7-9-3-1-2-4-10(9)8-14(11)12/h1-4,11H,5-8H2	3463	1	O=C1SCCC(=O)N2Cc3ccccc3CC12	epsilon_fused	Angiotensin-converting enzyme,Oryctolagus cuniculus										2.2381										1
InChI=1S/C13H13NO3S2/c15-12-6-13-14(12)7-10(9-19(13,16)17)8-18-11-4-2-1-3-5-11/h1-5,7,13H,6,8-9H2	3466	1	O=C1CC2N1C=C(CSc1ccccc1)CS2(=O)=O	beta_fused	Leukocyte elastase,Homo sapiens										3.10577										1
InChI=1S/C13H13NO4S2/c15-12-6-13-14(12)7-10(9-20(13,17)18)8-19(16)11-4-2-1-3-5-11/h1-5,7,13H,6,8-9H2	3468	1	O=C1CC2N1C=C(CS(=O)c1ccccc1)CS2(=O)=O	beta_fused	Leukocyte elastase,Homo sapiens										3.10577										1
InChI=1S/C13H13NO5S2/c15-12-6-13-14(12)7-10(9-21(13,18)19)8-20(16,17)11-4-2-1-3-5-11/h1-5,7,13H,6,8-9H2	3469	1	O=C1CC2N1C=C(CS(=O)(=O)c1ccccc1)CS2(=O)=O	beta_fused	Leukocyte elastase,Homo sapiens										3.10577										1
InChI=1S/C13H14N2O2S/c16-10(8-9-4-2-1-3-5-9)14-11-12(17)15-6-7-18-13(11)15/h1-5,11,13H,6-8H2,(H,14,16)	3473	1	O=C(Cc1ccccc1)NC1C(=O)N2CCSC12	beta_fused	Solute carrier family 22 member 8,Homo sapiens										2										1
InChI=1S/C13H14N2O3S/c16-11-6-12-15(11)10(8-19(12)18)13(17)14-7-9-4-2-1-3-5-9/h1-5,10,12H,6-8H2,(H,14,17)	3476	1	O=C(NCc1ccccc1)C1CS(=O)C2CC(=O)N12	beta_fused	Leukocyte elastase,Homo sapiens										3.10577										1
InChI=1S/C13H14N2O4S/c16-11-6-12-15(11)10(8-20(12,18)19)13(17)14-7-9-4-2-1-3-5-9/h1-5,10,12H,6-8H2,(H,14,17)	3478	1	O=C(NCc1ccccc1)C1CS(=O)(=O)C2CC(=O)N12	beta_fused	Leukocyte elastase,Homo sapiens										3.10577										1
InChI=1S/C13H15NO/c15-13-7-3-6-12-11-5-2-1-4-10(11)8-9-14(12)13/h1-2,4-5,12H,3,6-9H2	3482	1	O=C1CCCC2c3ccccc3CCN12	delta_fused	Poly [ADP-ribose] polymerase-1,Homo sapiens										2.26667										1
InChI=1S/C13H16N2O/c16-13-12-4-2-1-3-10(12)9-15(13)11-5-7-14-8-6-11/h1-4,11,14H,5-9H2/p+1	3487	1	O=C1c2ccccc2CN1C1CC[NH2+]CC1	gamma_fused	Poly [ADP-ribose] polymerase-1,Mus musculus										1.56522										1
InChI=1S/C13H16N2O2/c16-13-3-1-2-7-15(13)11-5-8-17-12-4-6-14-9-10(11)12/h4,6,9,11H,1-3,5,7-8H2	3489	1	O=C1CCCCN1C1CCOc2ccncc21	delta_single	Cavia porcellus,Cavia porcellus										2.81818										1
InChI=1S/C13H22N4O2/c18-12-11(7-10-1-2-15-8-10)9-17(12)13(19)16-5-3-14-4-6-16/h10-11,14-15H,1-9H2	3494	1	O=C1C(CC2CCNC2)CN1C(=O)N1CCNCC1	beta_single	Tryptase,Homo sapiens										1.07059										1
InChI=1S/C14H10N2O2S/c1-9-13(17)15-10-5-2-3-6-11(10)16(14(9)18)12-7-4-8-19-12/h2-8H,1H2,(H,15,17)	3498	1	C=C1C(=O)Nc2ccccc2N(c2cccs2)C1=O	epsilon_fused	Human immunodeficiency virus 1,Human immunodeficiency virus 1										1.54167										1
InChI=1S/C14H13N7O6S/c22-7(10(23)18-9-1-3-16-19-9)5-15-14(26)27-8-2-4-21(12(8)24)13(25)11-20-17-6-28-11/h1,3,6,8H,2,4-5H2,(H,15,26)(H2,16,18,19,23)	3515	1	O=C(NCC(=O)C(=O)Nc1cc[nH]n1)OC1CCN(C(=O)c2nncs2)C1=O	gamma_single	Cathepsin K,Homo sapiens										1.20588										1
InChI=1S/C14H14N2O2S/c17-14-12(18-11-4-2-1-3-5-11)6-8-16(14)10-13-15-7-9-19-13/h1-5,7,9,12H,6,8,10H2	3520	1	O=C1C(Oc2ccccc2)CCN1Cc1nccs1	gamma_single	Androgen Receptor,Homo sapiens										1.03448										1
InChI=1S/C14H14N2O2S/c17-14-13(18-12-4-2-1-3-5-12)6-7-16(14)8-11-9-19-10-15-11/h1-5,9-10,13H,6-8H2	3521	1	O=C1C(Oc2ccccc2)CCN1Cc1cscn1	gamma_single	Androgen Receptor,Homo sapiens										1.03448										1
InChI=1S/C14H14N4O2/c19-13-8-12(17-7-6-15-10-17)18(13)14(20)16-9-11-4-2-1-3-5-11/h1-7,10,12H,8-9H2,(H,16,20)	3522	1	O=C1CC(n2ccnc2)N1C(=O)NCc1ccccc1	beta_single	Leukocyte elastase,Homo sapiens										3.10577										1
InChI=1S/C14H15N5O2/c20-13-8-12(18-10-15-6-7-17-18)19(13)14(21)16-9-11-4-2-1-3-5-11/h1-7,10,12,17H,8-9H2,(H,16,21)	3524	1	O=C1CC(N2C=NC=CN2)N1C(=O)NCc1ccccc1	beta_single	Leukocyte elastase,Homo sapiens										3.10577										1
InChI=1S/C14H17N3O4S/c18-13-6-7-17(13)14(19)15-8-10-16(11-9-15)22(20,21)12-4-2-1-3-5-12/h1-5H,6-11H2	3531	1	O=C1CCN1C(=O)N1CCN(S(=O)(=O)c2ccccc2)CC1	beta_single	Tryptase,Homo sapiens										1.07059										1
InChI=1S/C14H17NO/c16-14-9-8-11-5-1-2-6-12(11)13-7-3-4-10-15(13)14/h1-2,5-6,13H,3-4,7-10H2	3532	1	O=C1CCc2ccccc2C2CCCCN12	epsilon_fused	Neprilysin,Rattus norvegicus										1.125										1
InChI=1S/C14H18N4O2/c19-13-12(9-11-1-3-15-4-2-11)10-18(13)14(20)17-7-5-16-6-8-17/h1-4,12,16H,5-10H2	3538	1	O=C1C(Cc2ccncc2)CN1C(=O)N1CCNCC1	beta_single	Tryptase,Homo sapiens										1.07059										1
InChI=1S/C14H22N4O3/c19-12-10-11(13(20)16-6-2-1-3-7-16)18(12)14(21)17-8-4-15-5-9-17/h11,15H,1-10H2	3541	1	O=C(C1CC(=O)N1C(=O)N1CCNCC1)N1CCCCC1	beta_single	Tryptase,Homo sapiens										1.07059										1
InChI=1S/C14H24N4O2/c19-13-12(8-11-2-1-3-16-9-11)10-18(13)14(20)17-6-4-15-5-7-17/h11-12,15-16H,1-10H2	3543	1	O=C1C(CC2CCCNC2)CN1C(=O)N1CCNCC1	beta_single	Tryptase,Homo sapiens										1.07059										1
InChI=1S/C15H13N5O3S2/c21-11-6-12-20(11)13(10(25-12)8-24-15-16-18-19-17-15)14(22)23-7-9-4-2-1-3-5-9/h1-5,12H,6-8H2,(H,16,17,18,19)	3561	1	O=C(OCc1ccccc1)C1=C(CSc2nnn[nH]2)SC2CC(=O)N12	beta_fused	Leukocyte elastase,Homo sapiens										3.10577										1
InChI=1S/C15H14N2O/c18-15-14-4-2-1-3-13(14)11-17(15)10-7-12-5-8-16-9-6-12/h1-6,8-9H,7,10-11H2	3566	1	O=C1c2ccccc2CN1CCc1ccncc1	gamma_fused	Integrin alpha-IIb/beta-3,Homo sapiens										1.70213										1
InChI=1S/C15H14N2O3S/c18-13-8-14(20-12-4-2-1-3-5-12)17(13)15(19)16-9-11-6-7-21-10-11/h1-7,10,14H,8-9H2,(H,16,19)	3567	1	O=C1CC(Oc2ccccc2)N1C(=O)NCc1ccsc1	beta_single	Leukocyte elastase,Homo sapiens										3.10577										1
InChI=1S/C15H14N2O3S/c18-13-9-14(20-11-5-2-1-3-6-11)17(13)15(19)16-10-12-7-4-8-21-12/h1-8,14H,9-10H2,(H,16,19)	3568	1	O=C1CC(Oc2ccccc2)N1C(=O)NCc1cccs1	beta_single	Leukocyte elastase,Homo sapiens										3.10577										1
InChI=1S/C15H14N2O4/c18-13-9-14(21-11-5-2-1-3-6-11)17(13)15(19)16-10-12-7-4-8-20-12/h1-8,14H,9-10H2,(H,16,19)	3569	1	O=C1CC(Oc2ccccc2)N1C(=O)NCc1ccco1	beta_single	Leukocyte elastase,Homo sapiens										3.10577										1
InChI=1S/C15H15NO3/c17-15-14(19-12-5-2-1-3-6-12)8-9-16(15)11-13-7-4-10-18-13/h1-7,10,14H,8-9,11H2	3575	1	O=C1C(Oc2ccccc2)CCN1Cc1ccco1	gamma_single	Androgen Receptor,Homo sapiens										1.03448										1
InChI=1S/C15H16N2O2/c18-14-9-8-13(17(14)12-6-7-12)15(19)16-10-11-4-2-1-3-5-11/h1-5,8-9,12-13H,6-7,10H2,(H,16,19)	3579	1	O=C(NCc1ccccc1)C1C=CC(=O)N1C1CC1	gamma_single	P2X purinoceptor 7,Homo sapiens										1.08088										1
InChI=1S/C15H16N2O5S/c18-13-6-14-17(13)8-12(10-23(14,20)21)9-22-15(19)16-7-11-4-2-1-3-5-11/h1-5,8,14H,6-7,9-10H2,(H,16,19)	3581	1	O=C(NCc1ccccc1)OCC1=CN2C(=O)CC2S(=O)(=O)C1	beta_fused	Cricetinae gen. sp.,Cricetinae gen. sp.										1.84211										1
InChI=1S/C15H16N6O2/c22-15-14(18-20-9-16-17-10-20)12-3-1-2-4-13(12)21(15)11-19-5-7-23-8-6-19/h1-4,9-10H,5-8,11H2/p+1/b18-14-	3582	1	O=C1/C(=N\n2cnnc2)c2ccccc2N1C[NH+]1CCOCC1	gamma_fused	Reverse transcriptase,Human immunodeficiency virus 1										3.5										1
InChI=1S/C15H17N3O3/c19-13-6-7-18(13)15(21)17-10-8-16(9-11-17)14(20)12-4-2-1-3-5-12/h1-5H,6-11H2	3583	1	O=C(c1ccccc1)N1CCN(C(=O)N2CCC2=O)CC1	beta_single	Tryptase,Homo sapiens										1.07059										1
InChI=1S/C15H17N3OS/c19-15-14-11(5-7-17(15)13-6-8-20-10-13)9-16-18(14)12-3-1-2-4-12/h6,8-10,12H,1-5,7H2	3584	1	O=C1c2c(cnn2C2CCCC2)CCN1c1ccsc1	delta_fused	Phosphodiesterase 4,Homo sapiens										1.77273										1
InChI=1S/C15H17N3OS/c19-15-14-11(7-8-17(15)13-6-3-9-20-13)10-16-18(14)12-4-1-2-5-12/h3,6,9-10,12H,1-2,4-5,7-8H2	3585	1	O=C1c2c(cnn2C2CCCC2)CCN1c1cccs1	delta_fused	Phosphodiesterase 4,Homo sapiens										1.77273										1
InChI=1S/C15H17N5O6S2/c21-9-5-10-20(9)11(14(24)19-3-1-2-4-19)8(7-28(10,25)26)6-27-15-16-12(22)13(23)17-18-15/h10H,1-7H2,(H,17,23)(H,16,18,22)	3586	1	O=C(C1=C(CSc2nc(=O)c(=O)[nH][nH]2)CS(=O)(=O)C2CC(=O)N12)N1CCCC1	beta_fused	Cricetinae gen. sp.,Cricetinae gen. sp.										1.84211										1
InChI=1S/C15H17N7O/c23-15-14(19-21-9-17-18-10-21)12-3-1-2-4-13(12)22(15)11-20-7-5-16-6-8-20/h1-4,9-10,16H,5-8,11H2/p+2/b19-14-	3587	1	O=C1/C(=N\n2cnnc2)c2ccccc2N1C[NH+]1CC[NH2+]CC1	gamma_fused	Reverse transcriptase,Human immunodeficiency virus 1										3.5										1
InChI=1S/C15H18N2O2/c18-14-11-17(9-8-16(14)10-12-6-7-12)15(19)13-4-2-1-3-5-13/h1-5,12H,6-11H2	3591	1	O=C1CN(C(=O)c2ccccc2)CCN1CC1CC1	delta_single	P2X purinoceptor 7,Homo sapiens										1.08088										1
InChI=1S/C16H10N2O3S2/c19-13-9-10(15(20)12-4-2-7-22-12)14(11-3-1-6-21-11)18(13)16-17-5-8-23-16/h1-9,14H	3608	1	O=C(C1=CC(=O)N(c2nccs2)C1c1ccco1)c1cccs1	gamma_single	Peroxisome proliferator-activated receptor gamma,Homo sapiens										1.6										1
InChI=1S/C16H11N3O2/c20-15-16(3-4-16)12-6-10-8-18-21-14(10)7-13(12)19(15)11-2-1-5-17-9-11/h1-2,5-9H,3-4H2	3609	1	O=C1N(c2cccnc2)c2cc3oncc3cc2C12CC2	gamma_fused	Sodium channel protein type IX alpha subunit,Homo sapiens										1.66234										1
InChI=1S/C16H12N2OS/c19-16-13-4-1-2-5-14(13)17-9-12-8-11(10-18(12)16)15-6-3-7-20-15/h1-7,9-10,12H,8H2	3610	1	O=C1c2ccccc2N=CC2CC(c3cccs3)=CN12	epsilon_fused	K562,Homo sapiens										1.55462										1
InChI=1S/C16H12N2OS2/c19-16-10-20-14-8-4-2-6-12(14)18(16)9-15-17-11-5-1-3-7-13(11)21-15/h1-8H,9-10H2	3611	1	O=C1CSc2ccccc2N1Cc1nc2ccccc2s1	delta_fused	Aldose reductase,Sus scrofa										2										1
InChI=1S/C16H13NO2/c18-15-10-11-17(15)16(19)14-8-6-13(7-9-14)12-4-2-1-3-5-12/h1-9H,10-11H2	3616	1	O=C1CCN1C(=O)c1ccc(-c2ccccc2)cc1	beta_single	Tryptase,Homo sapiens										1.07059										1
InChI=1S/C16H14N2O2/c19-15-5-2-10-18(15)14-4-1-3-13(11-14)16(20)12-6-8-17-9-7-12/h1,3-4,6-9,11H,2,5,10H2	3623	1	O=C(c1ccncc1)c1cccc(N2CCCC2=O)c1	gamma_single	Human immunodeficiency virus 1,Human immunodeficiency virus 1										1.54167										1
InChI=1S/C16H14N4O2/c21-13-7-6-11(8-17-13)20-15(10-4-2-1-3-5-10)12-9-18-19-14(12)16(20)22/h1-9,12,14-15,19H,(H,17,21)	3627	1	O=C1C2NN=CC2C(c2ccccc2)N1c1ccc(=O)[nH]c1	gamma_fused	Bromodomain-containing protein 4,Homo sapiens										1.05263										1
InChI=1S/C16H15N3O2/c20-15-16(21)19(14-6-8-17-9-7-14)11-10-18(15)12-13-4-2-1-3-5-13/h1-9H,10-12H2/p+1	3629	1	O=C1C(=O)N(c2cc[nH+]cc2)CCN1Cc1ccccc1	epsilon_fused	P2X purinoceptor 7,Homo sapiens										1.08088										1
InChI=1S/C16H15N3O2/c20-15-16(21)19(14-7-4-8-17-11-14)10-9-18(15)12-13-5-2-1-3-6-13/h1-8,11H,9-10,12H2	3630	1	O=C1C(=O)N(c2cccnc2)CCN1Cc1ccccc1	epsilon_fused	P2X purinoceptor 7,Homo sapiens										1.08088										1
InChI=1S/C16H16N2O2/c19-16-15(20-14-4-2-1-3-5-14)8-11-18(16)12-13-6-9-17-10-7-13/h1-7,9-10,15H,8,11-12H2	3638	1	O=C1C(Oc2ccccc2)CCN1Cc1ccncc1	gamma_single	Androgen Receptor,Homo sapiens										1.03448										1
InChI=1S/C16H16N2O2/c19-16-15(20-14-6-2-1-3-7-14)8-10-18(16)12-13-5-4-9-17-11-13/h1-7,9,11,15H,8,10,12H2	3639	1	O=C1C(Oc2ccccc2)CCN1Cc1cccnc1	gamma_single	Androgen Receptor,Homo sapiens										1.03448										1
InChI=1S/C16H16N2O2/c19-16-15(20-14-7-2-1-3-8-14)9-11-18(16)12-13-6-4-5-10-17-13/h1-8,10,15H,9,11-12H2	3640	1	O=C1C(Oc2ccccc2)CCN1Cc1ccccn1	gamma_single	Androgen Receptor,Homo sapiens										1.03448										1
InChI=1S/C16H17N3O/c20-16-15-12(11-17-19(15)14-7-4-8-14)9-10-18(16)13-5-2-1-3-6-13/h1-3,5-6,11,14H,4,7-10H2	3644	1	O=C1c2c(cnn2C2CCC2)CCN1c1ccccc1	delta_fused	Phosphodiesterase 4,Homo sapiens										1.77273										1
InChI=1S/C16H17N3O3S/c20-16-12(8-10-19(16)9-7-11-5-6-11)15-17-13-3-1-2-4-14(13)23(21,22)18-15/h1-4,8,11H,5-7,9-10H2,(H,17,18)	3645	1	O=C1C(C2=NS(=O)(=O)c3ccccc3N2)=CCN1CCC1CC1	gamma_single	Hepatitis C virus NS5B RNA-dependent RNA polymerase,Hepatitis C virus										1.75										1
InChI=1S/C16H17N3O3S/c20-16-15-12(6-8-18(16)13-4-2-1-3-5-13)10-17-19(15)14-7-9-23(21,22)11-14/h1-5,10,14H,6-9,11H2	3646	1	O=C1c2c(cnn2C2CCS(=O)(=O)C2)CCN1c1ccccc1	delta_fused	Phosphodiesterase 4,Homo sapiens										1.77273										1
InChI=1S/C16H17N3OS/c20-15-14-13(10-19(15)12-8-2-1-3-9-12)18-16(21-14)17-11-6-4-5-7-11/h1-3,8-9,11H,4-7,10H2,(H,17,18)	3648	1	O=C1c2sc(NC3CCCC3)nc2CN1c1ccccc1	gamma_fused	MAP kinase p38 alpha,Homo sapiens										1.71429										1
InChI=1S/C16H18N2O2/c19-15-10-13(14-8-4-5-9-18(14)15)16(20)17-11-12-6-2-1-3-7-12/h1-3,6-7,10,14H,4-5,8-9,11H2,(H,17,20)	3652	1	O=C(NCc1ccccc1)C1=CC(=O)N2CCCCC12	gamma_fused	Integrase,Human immunodeficiency virus 1										2.96078										1
InChI=1S/C16H18N2O5S/c19-14-8-15-18(14)9-13(11-24(15,21)22)10-23-16(20)17-7-6-12-4-2-1-3-5-12/h1-5,9,15H,6-8,10-11H2,(H,17,20)	3654	1	O=C(NCCc1ccccc1)OCC1=CN2C(=O)CC2S(=O)(=O)C1	beta_fused	Leukocyte elastase,Homo sapiens										3.10577										1
InChI=1S/C16H18N4O/c21-16-15-12(10-18-20(15)13-4-1-2-5-13)7-9-19(16)14-6-3-8-17-11-14/h3,6,8,10-11,13H,1-2,4-5,7,9H2	3655	1	O=C1c2c(cnn2C2CCCC2)CCN1c1cccnc1	delta_fused	Phosphodiesterase 4,Homo sapiens										1.77273										1
InChI=1S/C16H18N6O/c23-16-15(19-21-10-17-18-11-21)13-6-2-3-7-14(13)22(16)12-20-8-4-1-5-9-20/h2-3,6-7,10-11H,1,4-5,8-9,12H2/p+1/b19-15-	3659	1	O=C1/C(=N\n2cnnc2)c2ccccc2N1C[NH+]1CCCCC1	gamma_fused	Reverse transcriptase,Human immunodeficiency virus 1										3.5										1
InChI=1S/C16H20N2O2/c19-15-12-17(16(20)13-6-2-1-3-7-13)10-11-18(15)14-8-4-5-9-14/h1-3,6-7,14H,4-5,8-12H2	3664	1	O=C(c1ccccc1)N1CCN(C2CCCC2)C(=O)C1	delta_single	P2X purinoceptor 7,Homo sapiens										1.08088										1
InChI=1S/C16H20N2O2/c19-15-12-18(16(20)14-7-2-1-3-8-14)10-9-17(15)11-13-5-4-6-13/h1-3,7-8,13H,4-6,9-12H2	3665	1	O=C1CN(C(=O)c2ccccc2)CCN1CC1CCC1	delta_single	P2X purinoceptor 7,Homo sapiens										1.08088										1
InChI=1S/C16H20N2O2/c19-15-8-4-7-13-9-10-14(18(13)15)16(20)17-11-12-5-2-1-3-6-12/h1-3,5-6,13-14H,4,7-11H2,(H,17,20)	3667	1	O=C(NCc1ccccc1)C1CCC2CCCC(=O)N21	delta_fused	Thrombin,Homo sapiens										2.47826										1
InChI=1S/C16H20N2O2/c19-15-8-4-7-14(18(15)13-9-10-13)16(20)17-11-12-5-2-1-3-6-12/h1-3,5-6,13-14H,4,7-11H2,(H,17,20)	3668	1	O=C(NCc1ccccc1)C1CCCC(=O)N1C1CC1	delta_single	P2X purinoceptor 7,Homo sapiens										1.08088										1
InChI=1S/C16H20N2O3/c19-15-12-18(16(20)13-5-2-1-3-6-13)9-8-17(15)11-14-7-4-10-21-14/h1-3,5-6,14H,4,7-12H2	3670	1	O=C1CN(C(=O)c2ccccc2)CCN1CC1CCCO1	delta_single	P2X purinoceptor 7,Homo sapiens										1.08088										1
InChI=1S/C16H20N2O3/c19-15-14(9-8-13-7-4-10-18(13)15)17-16(20)21-11-12-5-2-1-3-6-12/h1-3,5-6,13-14H,4,7-11H2,(H,17,20)	3671	1	O=C(NC1CCC2CCCN2C1=O)OCc1ccccc1	delta_fused	Caspase-1,Homo sapiens										26.25										1
InChI=1S/C16H21N3O2/c20-15-13(10-12-6-8-17-9-7-12)11-19(15)16(21)18-14-4-2-1-3-5-14/h1-5,12-13,17H,6-11H2,(H,18,21)	3673	1	O=C(Nc1ccccc1)N1CC(CC2CCNCC2)C1=O	beta_single	Tryptase,Homo sapiens										1.07059										1
InChI=1S/C16H21N3O2/c20-15-13(10-12-6-8-17-9-7-12)11-19(15)16(21)18-14-4-2-1-3-5-14/h1-5,12-13,17H,6-11H2,(H,18,21)/p+1	3674	1	O=C(Nc1ccccc1)N1CC(CC2CC[NH2+]CC2)C1=O	beta_single	Tryptase,Homo sapiens										1.07059										1
InChI=1S/C16H22N2O/c19-16-15-8-3-2-7-14(15)13-18(16)12-6-11-17-9-4-1-5-10-17/h2-3,7-8H,1,4-6,9-13H2/p+1	3678	1	O=C1c2ccccc2CN1CCC[NH+]1CCCCC1	gamma_fused	Poly [ADP-ribose] polymerase-1,Homo sapiens										2.26667										1
InChI=1S/C16H23N5O/c22-16-3-1-2-7-21(16)13-6-8-20(10-13)15-9-14(17-11-18-15)19-12-4-5-12/h9,11-13H,1-8,10H2,(H,17,18,19)	3680	1	O=C1CCCCN1C1CCN(c2cc(NC3CC3)ncn2)C1	delta_single	Dipeptidyl peptidase IV,Homo sapiens										1.16667										1
InChI=1S/C17H13N3O/c21-17-14-5-1-2-7-16(14)19-10-13-9-12(11-20(13)17)15-6-3-4-8-18-15/h1-8,10-11,13H,9H2	3689	1	O=C1c2ccccc2N=CC2CC(c3ccccn3)=CN12	epsilon_fused	K562,Homo sapiens										1.55462										1
InChI=1S/C17H13N3O/c21-17-15-3-1-2-4-16(15)19-10-14-9-13(11-20(14)17)12-5-7-18-8-6-12/h1-8,10-11,14H,9H2	3691	1	O=C1c2ccccc2N=CC2CC(c3ccncc3)=CN12	epsilon_fused	K562,Homo sapiens										1.55462										1
InChI=1S/C17H13N3O/c21-17-15-5-1-2-6-16(15)19-10-14-8-13(11-20(14)17)12-4-3-7-18-9-12/h1-7,9-11,14H,8H2	3692	1	O=C1c2ccccc2N=CC2CC(c3cccnc3)=CN12	epsilon_fused	K562,Homo sapiens										1.55462										1
InChI=1S/C17H13N3O2/c21-14-7-6-12(10-19-14)20-16(11-4-2-1-3-5-11)15-13(17(20)22)8-9-18-15/h1-10,16,18H,(H,19,21)	3694	1	O=C1c2cc[nH]c2C(c2ccccc2)N1c1ccc(=O)[nH]c1	gamma_fused	Bromodomain-containing protein 4,Homo sapiens										1.05263										1
InChI=1S/C17H13NO/c19-16-10-5-11-18(16)17-14-8-3-1-6-12(14)13-7-2-4-9-15(13)17/h1-10,17H,11H2	3700	1	O=C1C=CCN1C1c2ccccc2-c2ccccc21	gamma_single	Aldose reductase,Homo sapiens										2.71429										1
InChI=1S/C17H13NOS2/c19-17-15(13-8-4-10-20-13)16(14-9-5-11-21-14)18(17)12-6-2-1-3-7-12/h1-11,15-16H	3702	1	O=C1C(c2cccs2)C(c2cccs2)N1c1ccccc1	beta_single	MCF7,Homo sapiens										4.16514										1
InChI=1S/C17H15N5O2S2/c18-13(12-9-25-10-19-12)15(23)20-14-16(24)22-7-11(8-26-17(14)22)6-21-4-2-1-3-5-21/h1-5,7,9-10,14,17-18H,6,8H2/p+1	3710	1	N=C(C(=O)NC1C(=O)N2C=C(C[n+]3ccccc3)CSC12)c1cscn1	beta_fused	Escherichia coli,Escherichia coli										2										1
InChI=1S/C17H15NO2/c19-17-13-6-2-1-5-12(13)11-18(17)15-9-10-20-16-8-4-3-7-14(15)16/h1-8,15H,9-11H2	3715	1	O=C1c2ccccc2CN1C1CCOc2ccccc21	gamma_fused	Rattus norvegicus,Rattus norvegicus										2.39726										1
InChI=1S/C17H16N4O/c22-17-10-14(13-4-2-1-3-5-13)7-9-20(17)15-11-18-16-6-8-19-21(16)12-15/h1-6,8,11-12,14H,7,9-10H2	3722	1	O=C1CC(c2ccccc2)CCN1c1cnc2ccnn2c1	delta_single	Dipeptidyl peptidase IV,Homo sapiens										1.16667										1
InChI=1S/C17H17N3O2/c21-16-13-10-15-17(22)19(11-12-4-2-1-3-5-12)8-9-20(15)14(13)6-7-18-16/h1-5,10H,6-9,11H2,(H,18,21)	3726	1	O=C1NCCc2c1cc1n2CCN(Cc2ccccc2)C1=O	delta_fused	Integrase,Human immunodeficiency virus 1										2.96078										1
InChI=1S/C17H17N3O2/c21-16-13-20(17(22)14-6-2-1-3-7-14)11-10-19(16)12-15-8-4-5-9-18-15/h1-9H,10-13H2	3728	1	O=C1CN(C(=O)c2ccccc2)CCN1Cc1ccccn1	delta_single	P2X purinoceptor 7,Homo sapiens										1.08088										1
InChI=1S/C17H17N3O2/c21-16-13-20(17(22)15-4-2-1-3-5-15)11-10-19(16)12-14-6-8-18-9-7-14/h1-9H,10-13H2	3729	1	O=C1CN(C(=O)c2ccccc2)CCN1Cc1ccncc1	delta_single	P2X purinoceptor 7,Homo sapiens										1.08088										1
InChI=1S/C17H17N3O2/c21-16-13-20(17(22)15-6-2-1-3-7-15)10-9-19(16)12-14-5-4-8-18-11-14/h1-8,11H,9-10,12-13H2	3730	1	O=C1CN(C(=O)c2ccccc2)CCN1Cc1cccnc1	delta_single	P2X purinoceptor 7,Homo sapiens										1.08088										1
InChI=1S/C17H17N3O2/c21-16-15-10-13-14(20(15)9-7-18-16)6-8-19(17(13)22)11-12-4-2-1-3-5-12/h1-5,10H,6-9,11H2,(H,18,21)	3731	1	O=C1NCCn2c1cc1c2CCN(Cc2ccccc2)C1=O	delta_fused	Integrase,Human immunodeficiency virus 1										2.96078										1
InChI=1S/C17H17NO/c19-17-10-3-4-12-18(17)13-11-15-8-5-7-14-6-1-2-9-16(14)15/h1-3,5-10H,4,11-13H2	3734	1	O=C1C=CCCN1CCc1cccc2ccccc12	delta_single	Histone deacetylase,Homo sapiens										1.6										1
InChI=1S/C17H17NO/c19-17-13-16(15-9-5-2-6-10-15)18(17)12-11-14-7-3-1-4-8-14/h1-10,16H,11-13H2	3736	1	O=C1CC(c2ccccc2)N1CCc1ccccc1	beta_single	Human immunodeficiency virus type 1 protease,Human immunodeficiency virus 1										1.04878										1
InChI=1S/C17H18N2O/c20-17-11-13-10-12(15-6-3-9-18-15)7-8-16(13)19(17)14-4-1-2-5-14/h3,6-10,14,18H,1-2,4-5,11H2	3738	1	O=C1Cc2cc(-c3ccc[nH]3)ccc2N1C1CCCC1	gamma_fused	Progesterone receptor,Homo sapiens										1.6										1
InChI=1S/C17H18N2O/c20-17-7-4-12-19(17)13-14-8-10-16(11-9-14)18-15-5-2-1-3-6-15/h1-3,5-6,8-11,18H,4,7,12-13H2	3739	1	O=C1CCCN1Cc1ccc(Nc2ccccc2)cc1	gamma_single	HT-29,Homo sapiens										1.97561										1
InChI=1S/C17H19N3OS/c21-17-16-4-2-1-3-13(16)10-20(17)14-5-7-19(8-6-14)11-15-9-18-12-22-15/h1-4,9,12,14H,5-8,10-11H2/p+1	3745	1	O=C1c2ccccc2CN1C1CC[NH+](Cc2cncs2)CC1	gamma_fused	Poly [ADP-ribose] polymerase-1,Mus musculus										1.56522										1
InChI=1S/C17H20N2O3/c20-17-14-10-13(22-16-5-1-2-9-21-16)6-7-15(14)18-11-12-4-3-8-19(12)17/h3,6-8,10,12,16,18H,1-2,4-5,9,11H2	3748	1	O=C1c2cc(OC3CCCCO3)ccc2NCC2CC=CN12	epsilon_fused	K562,Homo sapiens										1.55462										1
InChI=1S/C17H21N3O4/c21-15-6-8-20(15)16(22)18-9-11-19(12-10-18)17(23)24-13-7-14-4-2-1-3-5-14/h1-5H,6-13H2	3751	1	O=C(OCCc1ccccc1)N1CCN(C(=O)N2CCC2=O)CC1	beta_single	Tryptase,Homo sapiens										1.07059										1
InChI=1S/C17H22N2O2/c20-16-11-5-10-15(19(16)14-8-4-9-14)17(21)18-12-13-6-2-1-3-7-13/h1-3,6-7,14-15H,4-5,8-12H2,(H,18,21)	3755	1	O=C(NCc1ccccc1)C1CCCC(=O)N1C1CCC1	delta_single	P2X purinoceptor 7,Homo sapiens										1.08088										1
InChI=1S/C17H23NO/c19-16-13-17(9-5-2-6-10-17)11-12-18(16)14-15-7-3-1-4-8-15/h1,3-4,7-8H,2,5-6,9-14H2	3761	1	O=C1CC2(CCCCC2)CCN1Cc1ccccc1	delta_spiro	11-beta-hydroxysteroid dehydrogenase 1,Homo sapiens										1.21212										1
InChI=1S/C17H24N2OS/c20-17-15(9-4-10-16-19(17)12-13-21-16)18-11-5-8-14-6-2-1-3-7-14/h1-3,6-7,15-16,18H,4-5,8-13H2/p+1	3762	1	O=C1C([NH2+]CCCc2ccccc2)CCCC2SCCN12	epsilon_fused	Angiotensin-converting enzyme,Homo sapiens										1.5										1
InChI=1S/C18H13N5O3/c24-17-12-10-22(9-11-4-1-2-6-19-11)18(25)16(12)20-15-8-13(21-23(15)17)14-5-3-7-26-14/h1-8,20H,9-10H2	3772	1	O=C1c2[nH]c3cc(-c4ccco4)nn3c(=O)c2CN1Cc1ccccn1	gamma_fused	Serine/threonine-protein kinase Aurora-A,Homo sapiens										2.35714										1
InChI=1S/C18H13N7O2S/c26-17-13(20-14-4-6-19-23-14)8-12(22-24-17)11-2-1-3-15(21-11)25-9-10-5-7-28-16(10)18(25)27/h1-8H,9H2,(H,24,26)(H2,19,20,22,23)	3774	1	O=C1c2sccc2CN1c1cccc(-c2cc(Nc3cc[nH]n3)c(=O)[nH]n2)n1	gamma_fused	Tyrosine-protein kinase BTK,Homo sapiens										1.07317										1
InChI=1S/C18H14N2O3/c21-16-7-11-6-15-17-12(5-10-3-1-2-4-14(10)19-17)8-20(15)18(22)13(11)9-23-16/h1-6,13,15H,7-9H2	3780	1	O=C1CC2=CC3c4nc5ccccc5cc4CN3C(=O)C2CO1	delta_fused	L1210,Mus musculus										7										1
InChI=1S/C18H14N4O2/c23-18-15-11-19-12-21-17(15)24-10-9-22(18)14-6-4-13(5-7-14)16-3-1-2-8-20-16/h1-8,11-12H,9-10H2	3783	1	O=C1c2cncnc2OCCN1c1ccc(-c2ccccn2)cc1	epsilon_fused	Diacylglycerol O-acyltransferase 1,Homo sapiens										1.17808										1
InChI=1S/C18H15N3O3S/c22-18-14(8-10-21(18)11-13-5-3-4-9-19-13)16-12-25(23,24)17-7-2-1-6-15(17)20-16/h1-9,12,20H,10-11H2	3787	1	O=C1C(C2=CS(=O)(=O)c3ccccc3N2)=CCN1Cc1ccccn1	gamma_single	Genome polyprotein,Hepatitis C virus genotype 1b (isolate Con1) (HCV)										1.07407										1
InChI=1S/C18H15N5OS2/c24-15-2-1-6-23(15)9-14-21-16(17(22-14)18-19-5-7-25-18)11-3-4-12-13(8-11)26-10-20-12/h3-5,7-8,10H,1-2,6,9H2,(H,21,22)	3792	1	O=C1CCCN1Cc1nc(-c2nccs2)c(-c2ccc3ncsc3c2)[nH]1	gamma_single	TGF-beta receptor type I,Homo sapiens										1.5										1
InChI=1S/C18H16N2O/c21-18-16-8-4-5-9-17(16)19-11-15-10-14(12-20(15)18)13-6-2-1-3-7-13/h1-9,12,15,19H,10-11H2	3795	1	O=C1c2ccccc2NCC2CC(c3ccccc3)=CN12	epsilon_fused	K562,Homo sapiens										1.55462										1
InChI=1S/C18H16N2O2S/c21-18-15(22-13-6-2-1-3-7-13)10-11-20(18)12-17-19-14-8-4-5-9-16(14)23-17/h1-9,15H,10-12H2	3799	1	O=C1C(Oc2ccccc2)CCN1Cc1nc2ccccc2s1	gamma_single	Androgen Receptor,Homo sapiens										1.03448										1
InChI=1S/C18H16N4O/c23-18-17-10-15(16-6-7-19-13-20-16)12-21(17)8-9-22(18)11-14-4-2-1-3-5-14/h1-7,10,12-13H,8-9,11H2	3803	1	O=C1c2cc(-c3ccncn3)cn2CCN1Cc1ccccc1	delta_fused	MAP kinase ERK2,Homo sapiens										1.71429										1
InChI=1S/C18H17N3O2/c22-17-10-15(12-21(17)13-16-8-4-5-9-19-16)18(23)20-11-14-6-2-1-3-7-14/h1-10H,11-13H2,(H,20,23)	3806	1	O=C(NCc1ccccc1)C1=CC(=O)N(Cc2ccccn2)C1	gamma_single	Integrase,Human immunodeficiency virus 1										2.96078										1
InChI=1S/C18H17N3O3/c22-17-12-3-1-2-4-13(12)21-10-19-15(16(21)14-7-8-20(14)17)18(23)24-9-11-5-6-11/h1-4,10-11,14H,5-9H2	3807	1	O=C(OCC1CC1)c1ncn2c1C1CCN1C(=O)c1ccccc1-2	epsilon_fused	GABA-A receptor; anion channel,Rattus norvegicus										2.27273										1
InChI=1S/C18H17N3O3S2/c22-18-15(7-9-21(18)12-13-4-2-1-3-5-13)20-26(23,24)17-10-14-6-8-19-11-16(14)25-17/h1-6,8,10-11,15,20H,7,9,12H2	3809	1	O=C1C(NS(=O)(=O)c2cc3ccncc3s2)CCN1Cc1ccccc1	gamma_single	Plasminogen,Rattus norvegicus										1.5										1
InChI=1S/C18H17N3O4S/c22-16-7-8-20(16)12-3-5-13(6-4-12)21-11-14(25-18(21)24)10-19-17(23)15-2-1-9-26-15/h1-6,9,14H,7-8,10-11H2,(H,19,23)	3810	1	O=C(NCC1CN(c2ccc(N3CCC3=O)cc2)C(=O)O1)c1cccs1	beta_single	Coagulation factor X,Homo sapiens										1.67391										1
InChI=1S/C18H17N5O2/c24-15-6-7-23(15)17(12-4-2-1-3-5-12)18(25)21-10-14-16-13(9-20-14)8-19-11-22-16/h1-5,8-9,11,14,17H,6-7,10H2,(H,21,25)	3811	1	O=C(NCC1N=Cc2cncnc21)C(c1ccccc1)N1CCC1=O	beta_single	Human immunodeficiency virus type 1 protease,Human immunodeficiency virus 1										1.04878										1
InChI=1S/C18H17NO/c20-18-16(13-11-12-13)17(14-7-3-1-4-8-14)19(18)15-9-5-2-6-10-15/h1-10,13,16-17H,11-12H2	3816	1	O=C1C(C2CC2)C(c2ccccc2)N1c1ccccc1	beta_single	11-beta-hydroxysteroid dehydrogenase 1,Homo sapiens										1.21212										1
InChI=1S/C18H18N2O2/c21-17-12-11-16(20(17)15-9-5-2-6-10-15)18(22)19-13-14-7-3-1-4-8-14/h1-10,16H,11-13H2,(H,19,22)	3825	1	O=C(NCc1ccccc1)C1CCC(=O)N1c1ccccc1	gamma_single	P2X purinoceptor 7,Homo sapiens										1.08088										1
InChI=1S/C18H18N2O2/c21-17-14-20(18(22)16-9-5-2-6-10-16)12-11-19(17)13-15-7-3-1-4-8-15/h1-10H,11-14H2	3827	1	O=C1CN(C(=O)c2ccccc2)CCN1Cc1ccccc1	delta_single	P2X purinoceptor 7,Homo sapiens										1.08088										1
InChI=1S/C18H18N2O2/c21-17-6-3-7-20(17)8-9-22-15-11-14-10-13-4-1-2-5-16(13)18(14)19-12-15/h1-2,4-5,11-12H,3,6-10H2	3828	1	O=C1CCCN1CCOc1cnc2c(c1)Cc1ccccc1-2	gamma_single	Pyruvate dehydrogenase kinase isoform 2,Homo sapiens										1.07143										1
InChI=1S/C18H18N2O3/c21-17(19-14-7-3-1-4-8-14)13-16-18(22)20(11-12-23-16)15-9-5-2-6-10-15/h1-10,16H,11-13H2,(H,19,21)	3834	1	O=C(CC1OCCN(c2ccccc2)C1=O)Nc1ccccc1	delta_single	Coagulation factor IX,Homo sapiens										1.5										1
InChI=1S/C18H18N2O3S/c21-18-8-4-5-13-20(18)14-15-9-11-16(12-10-15)19-24(22,23)17-6-2-1-3-7-17/h1-4,6-12,19H,5,13-14H2	3835	1	O=C1C=CCCN1Cc1ccc(NS(=O)(=O)c2ccccc2)cc1	delta_single	Histone deacetylase,Homo sapiens										1.6										1
InChI=1S/C18H18N4O3/c23-15-8-14-18(25)22-7-6-19-16(22)11-21(14)10-13(15)17(24)20-9-12-4-2-1-3-5-12/h1-5,8,10,16,19H,6-7,9,11H2,(H,20,24)/p+1	3838	1	O=C(NCc1ccccc1)c1cn2c(cc1=O)C(=O)N1CC[NH2+]C1C2	delta_fused	Human immunodeficiency virus 1,Human immunodeficiency virus 1										1.54167										1
InChI=1S/C18H18N4O3/c23-16(21-8-3-4-9-21)12-7-10-22(17(12)24)18(25)15-11-19-13-5-1-2-6-14(13)20-15/h1-2,5-6,11-12H,3-4,7-10H2	3839	1	O=C(C1CCN(C(=O)c2cnc3ccccc3n2)C1=O)N1CCCC1	gamma_single	Dipeptidyl peptidase IV,Homo sapiens										1.16667										1
InChI=1S/C18H18N4O3S/c23-18-16(21-26(24,25)15-4-2-1-3-5-15)7-9-22(18)12-14-10-13-6-8-19-11-17(13)20-14/h1-6,8,10-11,16,19,21H,7,9,12H2	3841	1	O=C1C(NS(=O)(=O)c2ccccc2)CCN1Cc1cc2cc[nH]cc-2n1	gamma_single	Coagulation factor X,Oryctolagus cuniculus										2.47826										1
InChI=1S/C18H18N4O5S/c23-16-10-26-6-5-21(16)12-1-3-13(4-2-12)22-9-14(27-18(22)25)7-20-17(24)15-8-19-11-28-15/h1-4,8,11,14H,5-7,9-10H2,(H,20,24)	3843	1	O=C(NCC1CN(c2ccc(N3CCOCC3=O)cc2)C(=O)O1)c1cncs1	delta_single	Coagulation factor X,Homo sapiens										1.67391										1
InChI=1S/C18H18N6O6/c25-12(15(26)22-14-6-8-20-23-14)10-19-18(29)30-13-7-9-24(16(13)27)17(28)21-11-4-2-1-3-5-11/h1-6,8,13H,7,9-10H2,(H,19,29)(H,21,28)(H2,20,22,23,26)	3845	1	O=C(NCC(=O)C(=O)Nc1cc[nH]n1)OC1CCN(C(=O)Nc2ccccc2)C1=O	gamma_single	Cathepsin K,Homo sapiens										1.20588										1
InChI=1S/C18H19N3O2/c22-17-10-9-16(21(17)13-15-8-4-5-11-19-15)18(23)20-12-14-6-2-1-3-7-14/h1-8,11,16H,9-10,12-13H2,(H,20,23)	3848	1	O=C(NCc1ccccc1)C1CCC(=O)N1Cc1ccccn1	gamma_single	P2X purinoceptor 7,Homo sapiens										1.08088										1
InChI=1S/C18H19N3O3S/c22-18-17-13-20(25(23,24)16-7-4-9-19-11-16)12-14(17)8-10-21(18)15-5-2-1-3-6-15/h1-7,9,11,14,17H,8,10,12-13H2	3850	1	O=C1C2CN(S(=O)(=O)c3cccnc3)CC2CCN1c1ccccc1	delta_fused	Hormone sensitive lipase,Homo sapiens										1.12766										1
InChI=1S/C18H19N3O6S2/c22-16-12-26-8-7-20(16)13-3-5-14(6-4-13)21-11-15(27-18(21)23)10-19-29(24,25)17-2-1-9-28-17/h1-6,9,15,19H,7-8,10-12H2	3851	1	O=C1COCCN1c1ccc(N2CC(CNS(=O)(=O)c3cccs3)OC2=O)cc1	delta_single	Coagulation factor X,Homo sapiens										1.67391										1
InChI=1S/C18H19N5O4/c24-16-12-27-11-10-23(16)15-8-6-14(7-9-15)20-18(26)22-21-17(25)19-13-4-2-1-3-5-13/h1-9H,10-12H2,(H4,19,20,21,22,25,26)/p-1	3854	1	O=C([N-]NC(=O)Nc1ccc(N2CCOCC2=O)cc1)Nc1ccccc1	delta_single	Coagulation factor X,Homo sapiens										1.67391										1
InChI=1S/C18H19NO/c20-18-13-17(16-9-5-2-6-10-16)11-12-19(18)14-15-7-3-1-4-8-15/h1-10,17H,11-14H2	3858	1	O=C1CC(c2ccccc2)CCN1Cc1ccccc1	delta_single	Dipeptidyl peptidase IV,Homo sapiens										1.16667										1
InChI=1S/C18H20N2O/c21-18-12-14-11-13(16-7-4-10-19-16)8-9-17(14)20(18)15-5-2-1-3-6-15/h4,7-11,15,19H,1-3,5-6,12H2	3860	1	O=C1Cc2cc(-c3ccc[nH]3)ccc2N1C1CCCCC1	gamma_fused	Progesterone receptor,Homo sapiens										1.6										1
InChI=1S/C18H20N4O/c23-18-7-4-9-22(18)15-8-10-21(12-15)17-11-16(19-13-20-17)14-5-2-1-3-6-14/h1-3,5-6,11,13,15H,4,7-10,12H2	3870	1	O=C1CCCN1C1CCN(c2cc(-c3ccccc3)ncn2)C1	gamma_single	Dipeptidyl peptidase IV,Homo sapiens										1.16667										1
InChI=1S/C18H21N3O/c22-18-17-14(11-12-20(18)15-7-3-1-4-8-15)13-19-21(17)16-9-5-2-6-10-16/h1,3-4,7-8,13,16H,2,5-6,9-12H2	3875	1	O=C1c2c(cnn2C2CCCCC2)CCN1c1ccccc1	delta_fused	Phosphodiesterase 4,Homo sapiens										1.77273										1
InChI=1S/C18H21N3O/c22-18-17-15(12-19-21(17)16-8-4-5-9-16)10-11-20(18)13-14-6-2-1-3-7-14/h1-3,6-7,12,16H,4-5,8-11,13H2	3876	1	O=C1c2c(cnn2C2CCCC2)CCN1Cc1ccccc1	delta_fused	Phosphodiesterase 4,Homo sapiens										1.77273										1
InChI=1S/C18H22N4O4S2/c23-15(21-8-1-2-9-21)12-22-10-4-6-14(18(22)24)20-28(25,26)16-11-13-5-3-7-19-17(13)27-16/h3,5,7,11,14,20H,1-2,4,6,8-10,12H2	3878	1	O=C(CN1CCCC(NS(=O)(=O)c2cc3cccnc3s2)C1=O)N1CCCC1	delta_single	Coagulation factor X,Homo sapiens										1.67391										1
InChI=1S/C18H22N6O2/c25-18-2-1-5-24(18)14-3-6-23(10-14)17-8-16(19-12-20-17)22-7-4-15-13(9-22)11-26-21-15/h8,11-12,14H,1-7,9-10H2	3879	1	O=C1CCCN1C1CCN(c2cc(N3CCc4nocc4C3)ncn2)C1	gamma_single	Dipeptidyl peptidase IV,Homo sapiens										1.16667										1
InChI=1S/C18H23N5O4S/c24-16(22-9-3-4-10-22)12-23-11-5-8-15(17(23)25)21-28(26,27)18-19-13-6-1-2-7-14(13)20-18/h1-2,6-7,15,21H,3-5,8-12H2,(H,19,20)	3880	1	O=C(CN1CCCC(NS(=O)(=O)c2nc3ccccc3[nH]2)C1=O)N1CCCC1	delta_single	Coagulation factor X,Homo sapiens										1.67391										1
InChI=1S/C18H24N2O2/c21-16-11-12-20(16)17(15-9-5-2-6-10-15)18(22)19-13-14-7-3-1-4-8-14/h2,5-6,9-10,14,17H,1,3-4,7-8,11-13H2,(H,19,22)	3881	1	O=C(NCC1CCCCC1)C(c1ccccc1)N1CCC1=O	beta_single	Human immunodeficiency virus type 1 protease,Human immunodeficiency virus 1										1.04878										1
InChI=1S/C18H24N2O2/c21-17-14-20(18(22)16-9-5-2-6-10-16)12-11-19(17)13-15-7-3-1-4-8-15/h2,5-6,9-10,15H,1,3-4,7-8,11-14H2	3883	1	O=C1CN(C(=O)c2ccccc2)CCN1CC1CCCCC1	delta_single	P2X purinoceptor 7,Homo sapiens										1.08088										1
InChI=1S/C18H24N2O2/c21-18-17-4-2-1-3-14(17)13-20(18)16-5-9-19(10-6-16)15-7-11-22-12-8-15/h1-4,15-16H,5-13H2/p+1	3884	1	O=C1c2ccccc2CN1C1CC[NH+](C2CCOCC2)CC1	gamma_fused	Poly [ADP-ribose] polymerase-1,Homo sapiens										2.26667										1
InChI=1S/C18H29N5O4/c24-15-6-4-10-23(15)17(26)13-20-18(27)22-9-3-5-14(22)11-19-12-16(25)21-7-1-2-8-21/h14,19H,1-13H2,(H,20,27)/p+1	3891	1	O=C(C[NH2+]CC1CCCN1C(=O)NCC(=O)N1CCCC1=O)N1CCCC1	gamma_single	Angiotensin-converting enzyme,Homo sapiens										1.5										1
InChI=1S/C19H13N5O3S/c25-18-15(20-16-4-6-27-23-16)9-14(21-22-18)11-2-1-3-13(8-11)24-10-12-5-7-28-17(12)19(24)26/h1-9H,10H2,(H,22,25)(H,20,21,23)	3899	1	O=C1c2sccc2CN1c1cccc(-c2cc(Nc3ccon3)c(=O)[nH]n2)c1	gamma_fused	Tyrosine-protein kinase BTK,Homo sapiens										1.07317										1
InChI=1S/C19H13N7O/c27-19-16-15(24-18(25-16)13-8-21-10-22-9-13)17(12-4-2-1-3-5-12)26(19)14-6-7-20-11-23-14/h1-11,17H,(H,24,25)	3905	1	O=C1c2nc(-c3cncnc3)[nH]c2C(c2ccccc2)N1c1ccncn1	gamma_fused	p53-binding protein Mdm-2,Homo sapiens										1.24174										1
InChI=1S/C19H14N2O/c22-19-12-16-11-14(15-5-4-10-20-13-15)8-9-18(16)21(19)17-6-2-1-3-7-17/h1-11,13H,12H2	3907	1	O=C1Cc2cc(-c3cccnc3)ccc2N1c1ccccc1	gamma_fused	Androgen Receptor,Homo sapiens										1.03448										1
InChI=1S/C19H14N2O3/c22-19-15-3-1-2-4-16(15)20-9-14-7-13(10-21(14)19)12-5-6-17-18(8-12)24-11-23-17/h1-6,8-10,14H,7,11H2	3914	1	O=C1c2ccccc2N=CC2CC(c3ccc4c(c3)OCO4)=CN12	epsilon_fused	K562,Homo sapiens										1.55462										1
InChI=1S/C19H14N4O2S/c24-18-13-11-22(10-12-5-2-1-3-6-12)19(25)17(13)20-16-9-14(21-23(16)18)15-7-4-8-26-15/h1-9,20H,10-11H2	3917	1	O=C1c2[nH]c3cc(-c4cccs4)nn3c(=O)c2CN1Cc1ccccc1	gamma_fused	Serine/threonine-protein kinase Aurora-A,Homo sapiens										2.35714										1
InChI=1S/C19H14N4O3/c24-16-15-7-2-1-5-13(15)11-23(16)12-19(17(25)21-18(26)22-19)9-8-14-6-3-4-10-20-14/h1-7,10H,11-12H2,(H2,21,22,25,26)	3918	1	O=C1NC(=O)C(C#Cc2ccccn2)(CN2Cc3ccccc3C2=O)N1	gamma_fused	TNF-alpha,Homo sapiens										1.40099										1
InChI=1S/C19H15N3O/c23-19-13-6-3-5-12(18(13)17-9-4-10-22(17)19)16-11-20-14-7-1-2-8-15(14)21-16/h1-3,5-8,11,17H,4,9-10H2	3919	1	O=C1c2cccc(-c3cnc4ccccc4n3)c2C2CCCN12	gamma_fused	Cyclin-dependent kinase 4,Homo sapiens										1.04167										1
InChI=1S/C19H15N3O2/c23-18-19(24)22(11-10-21-18)14-6-7-17-16(12-14)15(8-9-20-17)13-4-2-1-3-5-13/h1-9,12H,10-11H2,(H,21,23)	3923	1	O=C1NCCN(c2ccc3nccc(-c4ccccc4)c3c2)C1=O	delta_single	Dipeptidyl peptidase IV,Homo sapiens										1.16667										1
InChI=1S/C19H15N5O2/c25-18-10-21-17(23-11-15(22-12-23)19-20-6-8-26-19)9-16-14-4-2-1-3-13(14)5-7-24(16)18/h1-4,6,8-9,11-12H,5,7,10H2	3925	1	O=C1CN=C(n2cnc(-c3ncco3)c2)C=C2c3ccccc3CCN12	epsilon_fused	Metabotropic glutamate receptor 5,Homo sapiens										1.21229										1
InChI=1S/C19H15NO/c21-19-13-18(20(19)15-9-2-1-3-10-15)17-12-6-8-14-7-4-5-11-16(14)17/h1-12,18H,13H2	3928	1	O=C1CC(c2cccc3ccccc23)N1c1ccccc1	beta_single	11-beta-hydroxysteroid dehydrogenase 1,Homo sapiens										1.21212										1
InChI=1S/C19H15NO2/c21-19-17(15-11-12-22-13-15)18(14-7-3-1-4-8-14)20(19)16-9-5-2-6-10-16/h1-13,17-18H	3929	1	O=C1C(c2ccoc2)C(c2ccccc2)N1c1ccccc1	beta_single	MCF7,Homo sapiens										4.16514										1
InChI=1S/C19H16N2O/c22-19-12-16-11-15(17-7-4-10-20-17)8-9-18(16)21(19)13-14-5-2-1-3-6-14/h1-11,20H,12-13H2	3932	1	O=C1Cc2cc(-c3ccc[nH]3)ccc2N1Cc1ccccc1	gamma_fused	Progesterone receptor,Homo sapiens										1.6										1
InChI=1S/C19H16N4O5/c24-15-7-4-10-19(16(25)21-18(27)22-17(19)26)23(15)12-8-9-14(20-11-12)28-13-5-2-1-3-6-13/h1-3,5-6,8-9,11H,4,7,10H2,(H2,21,22,25,26,27)	3939	1	O=C1NC(=O)C2(CCCC(=O)N2c2ccc(Oc3ccccc3)nc2)C(=O)N1	delta_spiro	Matrix metalloproteinase 13,Homo sapiens										2										1
InChI=1S/C19H16N6O2/c26-18-16-4-3-15(24-7-6-20-12-24)19(27)25(16)9-8-23(18)11-13-10-22-14-2-1-5-21-17(13)14/h1-7,10,12,22H,8-9,11H2	3940	1	O=C1c2ccc(-n3ccnc3)c(=O)n2CCN1Cc1c[nH]c2cccnc12	delta_fused	Gamma-secretase,Homo sapiens										1.34146										1
InChI=1S/C19H16N6O2/c26-18-16-4-3-15(24-7-6-20-12-24)19(27)25(16)9-8-23(18)11-13-10-22-17-14(13)2-1-5-21-17/h1-7,10,12H,8-9,11H2,(H,21,22)	3941	1	O=C1c2ccc(-n3ccnc3)c(=O)n2CCN1Cc1c[nH]c2ncccc12	delta_fused	Gamma-secretase,Homo sapiens										1.34146										1
InChI=1S/C19H16N6O2/c26-18-17-2-1-16(24-6-5-21-12-24)19(27)25(17)8-7-23(18)11-13-9-22-15-10-20-4-3-14(13)15/h1-6,9-10,12,22H,7-8,11H2	3942	1	O=C1c2ccc(-n3ccnc3)c(=O)n2CCN1Cc1c[nH]c2cnccc12	delta_fused	Gamma-secretase,Homo sapiens										1.34146										1
InChI=1S/C19H16N6O2/c26-18-17-5-4-16(23-8-6-20-13-23)19(27)24(17)10-9-22(18)12-14-11-21-25-7-2-1-3-15(14)25/h1-8,11,13H,9-10,12H2	3943	1	O=C1c2ccc(-n3ccnc3)c(=O)n2CCN1Cc1cnn2ccccc12	delta_fused	Gamma-secretase,Homo sapiens										1.34146										1
InChI=1S/C19H16N6O2/c26-18-17-6-5-16(24-8-7-20-12-24)19(27)25(17)10-9-23(18)11-15-13-3-1-2-4-14(13)21-22-15/h1-8,12H,9-11H2,(H,21,22)	3944	1	O=C1c2ccc(-n3ccnc3)c(=O)n2CCN1Cc1n[nH]c2ccccc12	delta_fused	Gamma-secretase,Homo sapiens										1.34146										1
InChI=1S/C19H16N6O6S/c26-11(15(27)23-14-5-7-21-24-14)9-20-19(30)31-12-6-8-25(17(12)28)18(29)16-22-10-3-1-2-4-13(10)32-16/h1-5,7,12H,6,8-9H2,(H,20,30)(H2,21,23,24,27)	3945	1	O=C(NCC(=O)C(=O)Nc1cc[nH]n1)OC1CCN(C(=O)c2nc3ccccc3s2)C1=O	gamma_single	Cathepsin K,Homo sapiens										1.20588										1
InChI=1S/C19H17N3O/c23-19-17-8-4-5-9-18(17)22-14-20-12-16(22)13-21(19)11-10-15-6-2-1-3-7-15/h1-9,12,14H,10-11,13H2	3946	1	O=C1c2ccccc2-n2cncc2CN1CCc1ccccc1	epsilon_fused	GABA-A receptor; anion channel,Rattus norvegicus										2.27273										1
InChI=1S/C19H17N3O/c23-19-18-7-6-17(22-11-9-20-14-22)12-16(18)8-10-21(19)13-15-4-2-1-3-5-15/h1-7,9,11-12,14H,8,10,13H2	3947	1	O=C1c2ccc(-n3ccnc3)cc2CCN1Cc1ccccc1	delta_fused	Gamma-secretase,Homo sapiens										1.34146										1
InChI=1S/C19H17N3O2/c23-18-19(24)22(17-8-4-7-16-15(17)9-10-20-16)12-11-21(18)13-14-5-2-1-3-6-14/h1-10,20H,11-13H2	3949	1	O=C1C(=O)N(c2cccc3[nH]ccc23)CCN1Cc1ccccc1	delta_single	P2X purinoceptor 7,Homo sapiens										1.08088										1
InChI=1S/C19H17N3O2/c23-18-9-4-10-22(18)14-6-3-5-13(11-14)12-17-15-7-1-2-8-16(15)19(24)21-20-17/h1-3,5-8,11H,4,9-10,12H2,(H,21,24)	3950	1	O=C1CCCN1c1cccc(Cc2n[nH]c(=O)c3ccccc23)c1	gamma_single	Poly [ADP-ribose] polymerase-1,Homo sapiens										2.26667										1
InChI=1S/C19H17N3O3/c23-19-16(24-15-9-5-2-6-10-15)11-12-22(19)13-17-20-18(21-25-17)14-7-3-1-4-8-14/h1-10,16H,11-13H2	3952	1	O=C1C(Oc2ccccc2)CCN1Cc1nc(-c2ccccc2)no1	gamma_single	Androgen Receptor,Homo sapiens										1.03448										1
InChI=1S/C19H17N3O3/c23-19-16(24-15-9-5-2-6-10-15)11-12-22(19)13-17-20-18(25-21-17)14-7-3-1-4-8-14/h1-10,16H,11-13H2	3953	1	O=C1C(Oc2ccccc2)CCN1Cc1noc(-c2ccccc2)n1	gamma_single	Androgen Receptor,Homo sapiens										1.03448										1
InChI=1S/C19H17N5O3S2/c25-19-15(23-29(26,27)18-8-12-10-20-6-3-17(12)28-18)4-7-24(19)11-13-9-16-14(22-13)2-1-5-21-16/h1-3,5-6,8-10,15,21,23H,4,7,11H2	3956	1	O=C1C(NS(=O)(=O)c2cc3cnccc3s2)CCN1Cc1cc2[nH]cccc-2n1	gamma_single	Coagulation factor X,Oryctolagus cuniculus										2.47826										1
InChI=1S/C19H17N5O3S2/c25-19-15(23-29(26,27)18-8-13-9-20-5-2-17(13)28-18)3-6-24(19)11-14-7-12-1-4-21-10-16(12)22-14/h1-2,4-5,7-10,15,21,23H,3,6,11H2	3959	1	O=C1C(NS(=O)(=O)c2cc3cnccc3s2)CCN1Cc1cc2cc[nH]cc-2n1	gamma_single	Coagulation factor X,Oryctolagus cuniculus										2.47826										1
InChI=1S/C19H17NO3/c21-19-18(13-7-8-16-17(9-13)23-11-22-16)14-3-1-2-4-15(14)20(19)10-12-5-6-12/h1-4,7-9,12,18H,5-6,10-11H2	3969	1	O=C1C(c2ccc3c(c2)OCO3)c2ccccc2N1CC1CC1	gamma_fused	Sodium channel protein type IX alpha subunit,Homo sapiens										1.66234										1
InChI=1S/C19H17NOS/c21-18-15-7-1-2-9-17(15)19(20(18)11-12-22-19)16-10-4-6-13-5-3-8-14(13)16/h1-2,4,6-7,9-10H,3,5,8,11-12H2	3971	1	O=C1c2ccccc2C2(c3cccc4c3CCC4)SCCN12	gamma_fused	Human immunodeficiency virus type 1 reverse transcriptase,Human immunodeficiency virus 1										4										1
InChI=1S/C19H18N2O2/c22-18-8-4-5-13-21(18)14-15-9-11-17(12-10-15)20-19(23)16-6-2-1-3-7-16/h1-4,6-12H,5,13-14H2,(H,20,23)	3974	1	O=C(Nc1ccc(CN2CCC=CC2=O)cc1)c1ccccc1	delta_single	Histone deacetylase,Homo sapiens										1.6										1
InChI=1S/C19H18N2O3S2/c22-18-14-21(11-10-20(18)13-15-6-2-1-3-7-15)26(23,24)19-12-16-8-4-5-9-17(16)25-19/h1-9,12H,10-11,13-14H2	3976	1	O=C1CN(S(=O)(=O)c2cc3ccccc3s2)CCN1Cc1ccccc1	delta_single	Coagulation factor X,Homo sapiens										1.67391										1
InChI=1S/C19H18N2O4/c22-18-19(23)21(10-9-20(18)13-14-5-2-1-3-6-14)15-7-4-8-16-17(15)25-12-11-24-16/h1-8H,9-13H2	3980	1	O=C1C(=O)N(c2cccc3c2OCCO3)CCN1Cc1ccccc1	delta_single	P2X purinoceptor 7,Homo sapiens										1.08088										1
InChI=1S/C19H18N2O4/c22-18-19(23)21(9-8-20(18)13-14-4-2-1-3-5-14)15-6-7-16-17(12-15)25-11-10-24-16/h1-7,12H,8-11,13H2	3981	1	O=C1C(=O)N(c2ccc3c(c2)OCCO3)CCN1Cc1ccccc1	delta_single	P2X purinoceptor 7,Homo sapiens										1.08088										1
InChI=1S/C19H18N4O2/c24-17(11-13-5-2-1-3-6-13)20-19-15-12-14(8-9-16(15)21-22-19)23-10-4-7-18(23)25/h1-3,5-6,8-9,12H,4,7,10-11H2,(H2,20,21,22,24)	3984	1	O=C(Cc1ccccc1)Nc1n[nH]c2ccc(N3CCCC3=O)cc12	gamma_single	Cyclin-dependent kinase 2,Homo sapiens										1.57143										1
InChI=1S/C19H18N4O7/c24-13(16(25)20-10-12-4-2-1-3-5-12)11-21-19(28)29-14-7-9-23(17(14)26)18(27)15-6-8-22-30-15/h1-6,8,14H,7,9-11H2,(H,20,25)(H,21,28)	3986	1	O=C(NCC(=O)C(=O)NCc1ccccc1)OC1CCN(C(=O)c2ccno2)C1=O	gamma_single	Cathepsin K,Homo sapiens										1.20588										1
InChI=1S/C19H19N3O3S/c23-19-14-22(11-10-21(19)13-15-6-2-1-3-7-15)26(24,25)18-12-16-8-4-5-9-17(16)20-18/h1-9,12,20H,10-11,13-14H2	3995	1	O=C1CN(S(=O)(=O)c2cc3ccccc3[nH]2)CCN1Cc1ccccc1	delta_single	Coagulation factor X,Homo sapiens										1.67391										1
InChI=1S/C19H19N3O6/c23-17-12-26-9-7-21(17)13-3-5-14(6-4-13)22-11-15(28-19(22)25)10-20-18(24)16-2-1-8-27-16/h1-6,8,15H,7,9-12H2,(H,20,24)	3997	1	O=C(NCC1CN(c2ccc(N3CCOCC3=O)cc2)C(=O)O1)c1ccco1	delta_single	Coagulation factor X,Homo sapiens										1.67391										1
InChI=1S/C19H19N5O2/c25-17-6-7-24(17)16(8-13-4-2-1-3-5-13)19(26)22-10-14-9-21-15-11-20-12-23-18(14)15/h1-5,9,11-12,14,16H,6-8,10H2,(H,22,26)	3998	1	O=C(NCC1C=Nc2cncnc21)C(Cc1ccccc1)N1CCC1=O	beta_single	Human immunodeficiency virus type 1 protease,Human immunodeficiency virus 1										1.04878										1
InChI=1S/C19H19N5O2/c25-17-6-7-24(17)16(8-13-4-2-1-3-5-13)19(26)22-11-15-18-14(10-21-15)9-20-12-23-18/h1-5,9-10,12,15-16H,6-8,11H2,(H,22,26)	3999	1	O=C(NCC1N=Cc2cncnc21)C(Cc1ccccc1)N1CCC1=O	beta_single	Human immunodeficiency virus type 1 protease,Human immunodeficiency virus 1										1.04878										1
InChI=1S/C19H19N5O7/c25-14(16(26)20-8-12-4-2-1-3-5-12)10-21-19(29)31-15-6-7-24(17(15)27)18(28)23-13-9-22-30-11-13/h1-5,9,11,15H,6-8,10H2,(H,20,26)(H,21,29)(H,23,28)	4000	1	O=C(NCC(=O)C(=O)NCc1ccccc1)OC1CCN(C(=O)Nc2cnoc2)C1=O	gamma_single	Cathepsin K,Homo sapiens										1.20588										1
InChI=1S/C19H19NO/c21-18-19(13-7-8-14-19)17(15-9-3-1-4-10-15)20(18)16-11-5-2-6-12-16/h1-6,9-12,17H,7-8,13-14H2	4001	1	O=C1N(c2ccccc2)C(c2ccccc2)C12CCCC2	beta_spiro	11-beta-hydroxysteroid dehydrogenase 1,Homo sapiens										1.21212										1
InChI=1S/C19H19NO/c21-19-8-4-5-14-20(19)15-13-16-9-11-18(12-10-16)17-6-2-1-3-7-17/h1-4,6-12H,5,13-15H2	4004	1	O=C1C=CCCN1CCc1ccc(-c2ccccc2)cc1	delta_single	Histone deacetylase,Homo sapiens										1.6										1
InChI=1S/C19H19NO3/c21-18-13-17(19(22)23-14-16-9-5-2-6-10-16)20(18)12-11-15-7-3-1-4-8-15/h1-10,17H,11-14H2	4005	1	O=C(OCc1ccccc1)C1CC(=O)N1CCc1ccccc1	beta_single	Human immunodeficiency virus type 1 protease,Human immunodeficiency virus 1										1.04878										1
InChI=1S/C19H20N2O/c22-19-18-14-20(16-7-3-1-4-8-16)13-15(18)11-12-21(19)17-9-5-2-6-10-17/h1-10,15,18H,11-14H2	4008	1	O=C1C2CN(c3ccccc3)CC2CCN1c1ccccc1	delta_fused	Hormone sensitive lipase,Homo sapiens										1.12766										1
InChI=1S/C19H20N2O3S/c22-19-18-12-15(20-25(23,24)17-9-5-2-6-10-17)11-14(18)13-21(19)16-7-3-1-4-8-16/h1-10,14-15,18,20H,11-13H2	4012	1	O=C1C2CC(NS(=O)(=O)c3ccccc3)CC2CN1c1ccccc1	gamma_fused	Hormone sensitive lipase,Homo sapiens										1.12766										1
InChI=1S/C19H20N4O3S3/c24-19-15(7-11-23(19)12-10-21-14-5-8-20-9-6-14)22-29(25,26)18-4-3-17(28-18)16-2-1-13-27-16/h1-6,8-9,13,15,22H,7,10-12H2,(H,20,21)/p+1	4017	1	O=C1C(NS(=O)(=O)c2ccc(-c3cccs3)s2)CCN1CCNc1cc[nH+]cc1	gamma_single	Coagulation factor X,Oryctolagus cuniculus										2.47826										1
InChI=1S/C19H21N3O/c23-19-18-7-2-1-5-15(18)13-22(19)17-8-11-21(12-9-17)14-16-6-3-4-10-20-16/h1-7,10,17H,8-9,11-14H2/p+1	4021	1	O=C1c2ccccc2CN1C1CC[NH+](Cc2ccccn2)CC1	gamma_fused	Poly [ADP-ribose] polymerase-1,Homo sapiens										2.26667										1
InChI=1S/C19H21N3O/c23-19-7-4-11-22(19)18-9-8-15(13-20-18)16-10-12-21(14-16)17-5-2-1-3-6-17/h1-3,5-6,8-9,13,16H,4,7,10-12,14H2	4022	1	O=C1CCCN1c1ccc(C2CCN(c3ccccc3)C2)cn1	gamma_single	Androgen Receptor,Homo sapiens										1.03448										1
InChI=1S/C19H21N3O2/c23-18(11-6-9-16-7-2-1-3-8-16)21-13-14-22(19(24)15-21)17-10-4-5-12-20-17/h1-5,7-8,10,12H,6,9,11,13-15H2	4023	1	O=C(CCCc1ccccc1)N1CCN(c2ccccn2)C(=O)C1	delta_single	Dipeptidyl peptidase IV,Homo sapiens										1.16667										1
InChI=1S/C19H21N3O3S/c23-19-14(10-13-4-3-6-16(13)22(19)11-12-8-9-12)18-20-15-5-1-2-7-17(15)26(24,25)21-18/h1-2,5,7,10,12-13,16H,3-4,6,8-9,11H2,(H,20,21)	4027	1	O=C1C(C2=NS(=O)(=O)c3ccccc3N2)=CC2CCCC2N1CC1CC1	delta_fused	Hepatitis C virus,Hepatitis C virus										1.17526										1
InChI=1S/C19H21NO/c21-19-13-4-6-15-20(19)14-5-3-9-17-11-7-10-16-8-1-2-12-18(16)17/h1-2,4,7-8,10-13H,3,5-6,9,14-15H2	4028	1	O=C1C=CCCN1CCCCc1cccc2ccccc12	delta_single	Histone deacetylase,Homo sapiens										1.6										1
InChI=1S/C19H21NO/c21-19-15-18(17-9-5-2-6-10-17)12-14-20(19)13-11-16-7-3-1-4-8-16/h1-10,18H,11-15H2	4029	1	O=C1CC(c2ccccc2)CCN1CCc1ccccc1	delta_single	Dipeptidyl peptidase IV,Homo sapiens										1.16667										1
InChI=1S/C19H22N2O3/c22-15-7-5-14(6-8-15)19(24)20-11-17-16-4-2-1-3-13(16)9-10-21(17)18(23)12-20/h1-4,14,17H,5-12H2	4031	1	O=C1CCC(C(=O)N2CC(=O)N3CCc4ccccc4C3C2)CC1	delta_fused	Schistosoma japonicum,Schistosoma japonicum										3										1
InChI=1S/C19H22N4O/c24-19-8-4-5-10-23(19)16-9-11-22(13-16)18-12-17(20-14-21-18)15-6-2-1-3-7-15/h1-3,6-7,12,14,16H,4-5,8-11,13H2	4033	1	O=C1CCCCN1C1CCN(c2cc(-c3ccccc3)ncn2)C1	delta_single	Dipeptidyl peptidase IV,Homo sapiens										1.16667										1
InChI=1S/C19H22N4O2/c24-17-13-21-18-19(23(17)9-6-14-7-10-25-11-8-14)22-16(12-20-18)15-4-2-1-3-5-15/h1-5,12,14H,6-11,13H2,(H,20,21)	4034	1	O=C1CNc2ncc(-c3ccccc3)nc2N1CCC1CCOCC1	delta_fused	Serine/threonine-protein kinase mTOR,Homo sapiens										1.04545										1
InChI=1S/C19H23N3O4S3/c23-17(21-9-1-2-10-21)13-22-11-3-5-14(19(22)24)20-29(25,26)18-8-7-16(28-18)15-6-4-12-27-15/h4,6-8,12,14,20H,1-3,5,9-11,13H2	4037	1	O=C(CN1CCCC(NS(=O)(=O)c2ccc(-c3cccs3)s2)C1=O)N1CCCC1	delta_single	Coagulation factor X,Homo sapiens										1.67391										1
InChI=1S/C19H24N2O2/c22-17-7-5-15(6-8-17)20-11-9-16(10-12-20)21-13-14-3-1-2-4-18(14)19(21)23/h1-4,15-16H,5-13H2/p+1	4042	1	O=C1CCC([NH+]2CCC(N3Cc4ccccc4C3=O)CC2)CC1	gamma_fused	Poly [ADP-ribose] polymerase-1,Mus musculus										1.56522										1
InChI=1S/C19H24N6O2/c26-19-3-1-2-6-25(19)15-4-7-24(11-15)18-9-17(20-13-21-18)23-8-5-16-14(10-23)12-27-22-16/h9,12-13,15H,1-8,10-11H2	4046	1	O=C1CCCCN1C1CCN(c2cc(N3CCc4nocc4C3)ncn2)C1	delta_single	Dipeptidyl peptidase IV,Homo sapiens										1.16667										1
InChI=1S/C19H25N3O/c23-19-10-7-15-22(19)14-6-2-1-5-12-20-18-11-13-21-17-9-4-3-8-16(17)18/h3-4,8-9,11,13H,1-2,5-7,10,12,14-15H2,(H,20,21)/p+1	4047	1	O=C1CCCN1CCCCCCNc1cc[nH+]c2ccccc12	gamma_single	Plasmodium falciparum,Plasmodium falciparum										2.32984										1
InChI=1S/C19H26N2O2/c22-18(13-20-12-6-9-15-7-2-1-3-8-15)21-14-16-10-4-5-11-17(16)19(21)23/h1-3,7-8,16-17,20H,4-6,9-14H2/p+1	4050	1	O=C(C[NH2+]CCCc1ccccc1)N1CC2CCCCC2C1=O	gamma_fused	Angiotensin-converting enzyme,Rattus norvegicus										1.16667										1
InChI=1S/C20H13N5O5/c26-16-13-4-2-1-3-12(13)9-25(16)10-20(17(27)23-18(28)24-20)6-5-11-7-14-15(21-8-11)22-19(29)30-14/h1-4,7-8H,9-10H2,(H,21,22,29)(H2,23,24,27,28)	4055	1	O=C1NC(=O)C(C#Cc2c[nH]c3nc(=O)oc-3c2)(CN2Cc3ccccc3C2=O)N1	gamma_fused	TNF-alpha,Homo sapiens										1.40099										1
InChI=1S/C20H14N2O2/c23-20-16-6-2-3-7-17(16)21-11-15-9-14(12-22(15)20)19-10-13-5-1-4-8-18(13)24-19/h1-8,10-12,15H,9H2	4056	1	O=C1c2ccccc2N=CC2CC(c3cc4ccccc4o3)=CN12	epsilon_fused	K562,Homo sapiens										1.55462										1
InChI=1S/C20H14N2OS/c23-20-16-6-2-3-7-17(16)21-11-15-9-14(12-22(15)20)19-10-13-5-1-4-8-18(13)24-19/h1-8,10-12,15H,9H2	4059	1	O=C1c2ccccc2N=CC2CC(c3cc4ccccc4s3)=CN12	epsilon_fused	K562,Homo sapiens										1.55462										1
InChI=1S/C20H14N6O2/c27-15-10-13(6-9-22-15)19-24-16-17(25-19)20(28)26(14-7-8-21-11-23-14)18(16)12-4-2-1-3-5-12/h1-11,18H,(H,22,27)(H,24,25)	4067	1	O=C1c2nc(-c3cc[nH]c(=O)c3)[nH]c2C(c2ccccc2)N1c1ccncn1	gamma_fused	p53-binding protein Mdm-2,Homo sapiens										1.24174										1
InChI=1S/C20H14N6O2/c27-15-8-4-7-14(23-15)26-18(12-5-2-1-3-6-12)16-17(20(26)28)25-19(24-16)13-9-21-11-22-10-13/h1-11,18H,(H,23,27)(H,24,25)	4068	1	O=C1c2nc(-c3cncnc3)[nH]c2C(c2ccccc2)N1c1cccc(=O)[nH]1	gamma_fused	p53-binding protein Mdm-2,Homo sapiens										1.24174										1
InChI=1S/C20H14N6O3/c27-18-13(7-4-8-21-18)26-16(11-5-2-1-3-6-11)14-15(19(26)28)25-17(24-14)12-9-22-20(29)23-10-12/h1-10,16H,(H,21,27)(H,24,25)(H,22,23,29)	4069	1	O=C1c2nc(-c3cnc(=O)[nH]c3)[nH]c2C(c2ccccc2)N1c1ccc[nH]c1=O	gamma_fused	p53-binding protein Mdm-2,Homo sapiens										1.24174										1
InChI=1S/C20H14N6O4/c27-17-11(9-22-20(30)25-17)16-23-13-14(24-16)19(29)26(12-7-4-8-21-18(12)28)15(13)10-5-2-1-3-6-10/h1-9,15H,(H,21,28)(H,23,24)(H2,22,25,27,30)	4070	1	O=C1c2nc(-c3c[nH]c(=O)[nH]c3=O)[nH]c2C(c2ccccc2)N1c1ccc[nH]c1=O	gamma_fused	p53-binding protein Mdm-2,Homo sapiens										1.24174										1
InChI=1S/C20H15N3O/c24-20-17-3-1-2-4-19(17)22-11-16-10-15(12-23(16)20)13-5-6-18-14(9-13)7-8-21-18/h1-9,11-12,16,21H,10H2	4071	1	O=C1c2ccccc2N=CC2CC(c3ccc4[nH]ccc4c3)=CN12	epsilon_fused	K562,Homo sapiens										1.55462										1
InChI=1S/C20H15N5O/c26-20-18-17(13-24(23-18)16-11-21-22-12-16)19(14-7-3-1-4-8-14)25(20)15-9-5-2-6-10-15/h1-13,19H,(H,21,22)	4072	1	O=C1c2nn(-c3cn[nH]c3)cc2C(c2ccccc2)N1c1ccccc1	gamma_fused	p53-binding protein Mdm-2,Homo sapiens										1.24174										1
InChI=1S/C20H15NO2S/c22-19(15-11-12-24-13-15)17-18(14-7-3-1-4-8-14)21(20(17)23)16-9-5-2-6-10-16/h1-13,17-18H	4075	1	O=C(c1ccsc1)C1C(=O)N(c2ccccc2)C1c1ccccc1	beta_single	MCF7,Homo sapiens										4.16514										1
InChI=1S/C20H15NO2S/c22-19(16-12-7-13-24-16)17-18(14-8-3-1-4-9-14)21(20(17)23)15-10-5-2-6-11-15/h1-13,17-18H	4076	1	O=C(c1cccs1)C1C(=O)N(c2ccccc2)C1c1ccccc1	beta_single	MCF7,Homo sapiens										4.16514										1
InChI=1S/C20H15NO3S/c22-20-19(13-7-8-17-18(10-13)24-12-23-17)15-5-1-2-6-16(15)21(20)11-14-4-3-9-25-14/h1-10,19H,11-12H2	4080	1	O=C1C(c2ccc3c(c2)OCO3)c2ccccc2N1Cc1cccs1	gamma_fused	Sodium channel protein type IX alpha subunit,Homo sapiens										1.66234										1
InChI=1S/C20H15NOS/c22-19-16-9-3-4-10-18(16)20(21(19)12-13-23-20)17-11-5-7-14-6-1-2-8-15(14)17/h1-11H,12-13H2	4081	1	O=C1c2ccccc2C2(c3cccc4ccccc34)SCCN12	gamma_fused	Human immunodeficiency virus type 1 reverse transcriptase,Human immunodeficiency virus 1										4										1
InChI=1S/C20H16N2O/c23-20-19(16-9-6-12-21-13-16)17-10-4-5-11-18(17)22(20)14-15-7-2-1-3-8-15/h1-13,19H,14H2	4093	1	O=C1C(c2cccnc2)c2ccccc2N1Cc1ccccc1	gamma_fused	Sodium channel protein type IX alpha subunit,Homo sapiens										1.66234										1
InChI=1S/C20H16N2O/c23-20-19-17(15-7-3-1-4-8-15)11-13-21-18(19)12-14-22(20)16-9-5-2-6-10-16/h1-11,13H,12,14H2	4094	1	O=C1c2c(-c3ccccc3)ccnc2CCN1c1ccccc1	delta_fused	Dipeptidyl peptidase IV,Homo sapiens										1.16667										1
InChI=1S/C20H16N2O/c23-20-19-17(16-9-5-2-6-10-16)11-12-21-18(19)14-22(20)13-15-7-3-1-4-8-15/h1-12H,13-14H2	4095	1	O=C1c2c(-c3ccccc3)ccnc2CN1Cc1ccccc1	gamma_fused	Cytochrome P450 3A4,Homo sapiens										8.98113										1
InChI=1S/C20H16N4O3/c25-19-14-12-23(9-8-13-5-2-1-3-6-13)20(26)18(14)21-17-11-15(22-24(17)19)16-7-4-10-27-16/h1-7,10-11,21H,8-9,12H2	4097	1	O=C1c2[nH]c3cc(-c4ccco4)nn3c(=O)c2CN1CCc1ccccc1	gamma_fused	Serine/threonine-protein kinase Aurora-A,Homo sapiens										2.35714										1
InChI=1S/C20H17N5O3/c26-18(23-12-13-5-2-1-3-6-13)16-11-15-14(7-4-8-21-15)17(24-16)25-10-9-22-19(27)20(25)28/h1-8,11H,9-10,12H2,(H,22,27)(H,23,26)	4100	1	O=C1NCCN(c2nc(C(=O)NCc3ccccc3)cc3ncccc23)C1=O	delta_single	Human immunodeficiency virus type 1 integrase,Human immunodeficiency virus 1										2.32143										1
InChI=1S/C20H17N5O3S/c26-19-16-5-4-15(24-7-6-21-12-24)20(27)25(16)9-8-23(19)10-11-28-17-3-1-2-14-18(17)29-13-22-14/h1-7,12-13H,8-11H2	4101	1	O=C1c2ccc(-n3ccnc3)c(=O)n2CCN1CCOc1cccc2ncsc12	delta_fused	Gamma-secretase,Homo sapiens										1.34146										1
InChI=1S/C20H17NOS/c22-20-18(13-15-11-12-23-14-15)19(16-7-3-1-4-8-16)21(20)17-9-5-2-6-10-17/h1-12,14,18-19H,13H2	4107	1	O=C1C(Cc2ccsc2)C(c2ccccc2)N1c1ccccc1	beta_single	MCF7,Homo sapiens										4.16514										1
InChI=1S/C20H18N2O/c23-20-14-17-13-16(18-7-4-11-21-18)8-9-19(17)22(20)12-10-15-5-2-1-3-6-15/h1-9,11,13,21H,10,12,14H2	4109	1	O=C1Cc2cc(-c3ccc[nH]3)ccc2N1CCc1ccccc1	gamma_fused	Progesterone receptor,Homo sapiens										1.6										1
InChI=1S/C20H18N2O/c23-20-18-11-10-17(9-8-15-4-2-1-3-5-15)21-19(18)12-13-22(20)14-16-6-7-16/h1-5,10-11,16H,6-7,12-14H2	4110	1	O=C1c2ccc(C#Cc3ccccc3)nc2CCN1CC1CC1	delta_fused	Metabotropic glutamate receptor 5,Homo sapiens										1.21229										1
InChI=1S/C20H18N2O2/c1-14-9-16-11-21-19-10-17(24-13-15-5-3-2-4-6-15)7-8-18(19)20(23)22(16)12-14/h2-8,10-11,16H,1,9,12-13H2	4111	1	C=C1CC2C=Nc3cc(OCc4ccccc4)ccc3C(=O)N2C1	epsilon_fused	LS174T,Homo sapiens										2.5										1
InChI=1S/C20H18N4O2/c25-19-20(26)24(12-11-22(19)14-16-5-2-1-3-6-16)18-8-4-7-17(13-18)23-10-9-21-15-23/h1-10,13,15H,11-12,14H2	4117	1	O=C1C(=O)N(c2cccc(-n3ccnc3)c2)CCN1Cc1ccccc1	delta_single	P2X purinoceptor 7,Homo sapiens										1.08088										1
InChI=1S/C20H18N4O3S3/c25-20-15(6-8-24(20)12-14-10-13-5-7-21-11-16(13)22-14)23-30(26,27)19-4-3-18(29-19)17-2-1-9-28-17/h1-5,7,9-11,15,21,23H,6,8,12H2	4119	1	O=C1C(NS(=O)(=O)c2ccc(-c3cccs3)s2)CCN1Cc1cc2cc[nH]cc-2n1	gamma_single	Coagulation factor X,Oryctolagus cuniculus										2.47826										1
InChI=1S/C20H18N4O3S3/c25-20-16(6-8-24(20)12-14-10-13-11-21-7-5-15(13)22-14)23-30(26,27)19-4-3-18(29-19)17-2-1-9-28-17/h1-5,7,9-11,16,21,23H,6,8,12H2	4121	1	O=C1C(NS(=O)(=O)c2ccc(-c3cccs3)s2)CCN1Cc1cc2c[nH]ccc-2n1	gamma_single	Coagulation factor X,Oryctolagus cuniculus										2.47826										1
InChI=1S/C20H18N6O2/c27-15-7-6-14(10-23-15)26-18(12-4-2-1-3-5-12)16-17(20(26)28)25-19(24-16)13-8-21-11-22-9-13/h1-5,8-9,11,14,18H,6-7,10H2,(H,23,27)(H,24,25)	4122	1	O=C1CCC(N2C(=O)c3nc(-c4cncnc4)[nH]c3C2c2ccccc2)CN1	gamma_fused	p53-binding protein Mdm-2,Homo sapiens										1.24174										1
InChI=1S/C20H19N3O/c24-20-18-11-10-16(9-8-15-5-3-4-13-21-15)22-19(18)12-14-23(20)17-6-1-2-7-17/h3-5,10-11,13,17H,1-2,6-7,12,14H2	4123	1	O=C1c2ccc(C#Cc3ccccn3)nc2CCN1C1CCCC1	delta_fused	Metabotropic glutamate receptor 5,Homo sapiens										1.21229										1
InChI=1S/C20H19N3O2/c24-19-20(25)23(12-14-6-2-1-3-7-14)13-16(22-19)10-15-11-21-18-9-5-4-8-17(15)18/h1-9,11,16,21H,10,12-13H2,(H,22,24)	4127	1	O=C1NC(Cc2c[nH]c3ccccc23)CN(Cc2ccccc2)C1=O	delta_single	Neurokinin 1 receptor,Homo sapiens										1.14667										1
InChI=1S/C20H19N3O3/c24-16-8-4-7-15-18(16)17(20(26)22(15)12-9-10-12)14-11-21-23(19(14)25)13-5-2-1-3-6-13/h1-3,5-6,11-12,17,21H,4,7-10H2	4128	1	O=C1CCCC2=C1C(c1c[nH]n(-c3ccccc3)c1=O)C(=O)N2C1CC1	gamma_fused	Elongation of very long chain fatty acids protein 6,Homo sapiens										1.36										1
InChI=1S/C20H19N3O3S2/c24-20-17(10-13-23(20)14-15-4-2-1-3-5-15)22-28(25,26)19-7-6-18(27-19)16-8-11-21-12-9-16/h1-9,11-12,17,22H,10,13-14H2	4129	1	O=C1C(NS(=O)(=O)c2ccc(-c3ccncc3)s2)CCN1Cc1ccccc1	gamma_single	Coagulation factor X,Homo sapiens										1.67391										1
InChI=1S/C20H19N3O4/c24-18-7-4-10-23(18)14-8-9-16-15(11-14)17(27-20(26)22-16)12-21-19(25)13-5-2-1-3-6-13/h1-3,5-6,8-9,11,17H,4,7,10,12H2,(H,21,25)(H,22,26)	4130	1	O=C1Nc2ccc(N3CCCC3=O)cc2C(CNC(=O)c2ccccc2)O1	gamma_single	Elongation of very long chain fatty acids protein 6,Homo sapiens										1.36										1
InChI=1S/C20H19N5O2/c26-17-2-1-9-25(17)14-7-3-12(4-8-14)15-10-16-18(20(27)22-11-21-16)19(24-15)23-13-5-6-13/h3-4,7-8,10-11,13H,1-2,5-6,9H2,(H,23,24)(H,21,22,27)	4132	1	O=C1CCCN1c1ccc(-c2cc3nc[nH]c(=O)c3c(NC3CC3)n2)cc1	gamma_single	Tyrosine-protein kinase SYK,Homo sapiens										1.1										1
InChI=1S/C20H19N5O2/c26-19(23-10-14-2-1-6-21-9-14)12-25-7-5-15-3-4-16(8-17(15)20(25)27)18-11-22-13-24-18/h1-4,6,8-9,11,13H,5,7,10,12H2,(H,22,24)(H,23,26)	4134	1	O=C(CN1CCc2ccc(-c3c[nH]cn3)cc2C1=O)NCc1cccnc1	delta_fused	Homo sapiens,Homo sapiens										1.31944										1
InChI=1S/C20H19N5O4/c26-17(23-9-15-19-14(8-22-15)7-21-12-24-19)10-25-16(6-18(25)27)20(28)29-11-13-4-2-1-3-5-13/h1-5,7-8,12,15-16H,6,9-11H2,(H,23,26)	4135	1	O=C(CN1C(=O)CC1C(=O)OCc1ccccc1)NCC1N=Cc2cncnc21	beta_single	Human immunodeficiency virus type 1 protease,Human immunodeficiency virus 1										1.04878										1
InChI=1S/C20H19N5OS/c26-19-7-6-15(14-27-20-23-9-3-10-24-20)25(19)13-12-22-18-8-11-21-17-5-2-1-4-16(17)18/h1-11,15H,12-14H2,(H,21,22)/p+1	4136	1	O=C1C=CC(CSc2ncccn2)N1CCNc1cc[nH+]c2ccccc12	gamma_single	Plasmodium falciparum,Plasmodium falciparum										2.32984										1
InChI=1S/C20H19N7O2S/c28-18(23-15-5-6-22-25-17(15)26-9-7-21-8-10-26)16-12-30-20(24-16)27-11-13-3-1-2-4-14(13)19(27)29/h1-6,12,21H,7-11H2,(H,22,23,28)/p+1	4137	1	O=C(Nc1ccnnc1N1CC[NH2+]CC1)c1csc(N2Cc3ccccc3C2=O)n1	gamma_fused	Serine/threonine-protein kinase Chk1,Homo sapiens										2										1
InChI=1S/C20H19N7O2S/c28-18(24-15-9-22-12-23-17(15)26-7-5-21-6-8-26)16-11-30-20(25-16)27-10-13-3-1-2-4-14(13)19(27)29/h1-4,9,11-12,21H,5-8,10H2,(H,24,28)/p+1	4138	1	O=C(Nc1cncnc1N1CC[NH2+]CC1)c1csc(N2Cc3ccccc3C2=O)n1	gamma_fused	Serine/threonine-protein kinase Chk1,Homo sapiens										2										1
InChI=1S/C20H19NO3/c22-20-19(14-7-8-17-18(11-14)24-12-23-17)15-3-1-2-4-16(15)21(20)10-9-13-5-6-13/h1-4,7-8,11,13,19H,5-6,9-10,12H2	4141	1	O=C1C(c2ccc3c(c2)OCO3)c2ccccc2N1CCC1CC1	gamma_fused	Sodium channel protein type IX alpha subunit,Homo sapiens										1.66234										1
InChI=1S/C20H19NO3/c22-20-19(14-8-9-17-18(10-14)24-12-23-17)15-6-1-2-7-16(15)21(20)11-13-4-3-5-13/h1-2,6-10,13,19H,3-5,11-12H2	4142	1	O=C1C(c2ccc3c(c2)OCO3)c2ccccc2N1CC1CCC1	gamma_fused	Sodium channel protein type IX alpha subunit,Homo sapiens										1.66234										1
InChI=1S/C20H20N2O2/c23-19-13-18(20(24)21-14-17-9-5-2-6-10-17)15-22(19)12-11-16-7-3-1-4-8-16/h1-10,13H,11-12,14-15H2,(H,21,24)	4145	1	O=C(NCc1ccccc1)C1=CC(=O)N(CCc2ccccc2)C1	gamma_single	Integrase,Human immunodeficiency virus 1										2.96078										1
InChI=1S/C20H20N2O2S/c23-19(18-10-5-11-25-18)21-17-9-4-8-15-16(17)13-22(20(15)24)12-14-6-2-1-3-7-14/h1-7,9-11,15-17H,8,12-13H2,(H,21,23)	4146	1	O=C(NC1C=CCC2C(=O)N(Cc3ccccc3)CC12)c1cccs1	gamma_fused	Coagulation factor X,Homo sapiens										1.67391										1
InChI=1S/C20H20N4O3/c21-19-16-7-6-14(10-13(16)12-22-19)23-18(25)11-17-20(26)24(8-9-27-17)15-4-2-1-3-5-15/h1-7,10,17H,8-9,11-12H2,(H2,21,22)(H,23,25)/p+1	4155	1	[NH2+]=C1NCc2cc(NC(=O)CC3OCCN(c4ccccc4)C3=O)ccc21	delta_single	Coagulation factor IX,Homo sapiens										1.5										1
InChI=1S/C20H21N3O/c24-20-12-21-17(14-23(20)13-15-6-2-1-3-7-15)10-16-11-22-19-9-5-4-8-18(16)19/h1-9,11,17,21-22H,10,12-14H2/p+1	4157	1	O=C1C[NH2+]C(Cc2c[nH]c3ccccc23)CN1Cc1ccccc1	delta_single	Neurokinin 1 receptor,Homo sapiens										1.14667										1
InChI=1S/C20H21N3O2/c24-18-20(15-23(18)17-9-5-2-6-10-17)11-13-22(14-12-20)19(25)21-16-7-3-1-4-8-16/h1-10H,11-15H2,(H,21,25)	4159	1	O=C(Nc1ccccc1)N1CCC2(CC1)CN(c1ccccc1)C2=O	beta_spiro	Vanilloid receptor,Homo sapiens										2.45455										1
InChI=1S/C20H21N3O4/c24-17-10-16-20(26)23-8-4-5-9-27-18(23)13-22(16)12-15(17)19(25)21-11-14-6-2-1-3-7-14/h1-3,6-7,10,12,18H,4-5,8-9,11,13H2,(H,21,25)	4162	1	O=C(NCc1ccccc1)c1cn2c(cc1=O)C(=O)N1CCCCOC1C2	delta_fused	Human immunodeficiency virus 1,Human immunodeficiency virus 1										1.54167										1
InChI=1S/C20H21N5O2/c21-20-23-9-7-18(26)25(20)12-14-6-8-22-17(10-14)24-13-16(11-19(24)27)15-4-2-1-3-5-15/h1-6,8,10,16H,7,9,11-13H2,(H2,21,23)	4164	1	N=C1NCCC(=O)N1Cc1ccnc(N2CC(c3ccccc3)CC2=O)c1	gamma_single	HERG,Homo sapiens										7.80952										1
InChI=1S/C20H21NO/c22-20-10-4-5-15-21(20)16-6-7-17-11-13-19(14-12-17)18-8-2-1-3-9-18/h1-4,8-14H,5-7,15-16H2	4167	1	O=C1C=CCCN1CCCc1ccc(-c2ccccc2)cc1	delta_single	Histone deacetylase,Homo sapiens										1.6										1
InChI=1S/C20H21NO2/c22-20-19-12-15(14-23-18-9-5-2-6-10-18)11-16(19)13-21(20)17-7-3-1-4-8-17/h1-10,15-16,19H,11-14H2	4168	1	O=C1C2CC(COc3ccccc3)CC2CN1c1ccccc1	gamma_fused	Hormone sensitive lipase,Homo sapiens										1.12766										1
InChI=1S/C20H21NO2/c22-20-7-3-10-21(20)11-4-12-23-17-8-9-19-16(14-17)13-15-5-1-2-6-18(15)19/h1-2,5-6,8-9,14H,3-4,7,10-13H2	4169	1	O=C1CCCN1CCCOc1ccc2c(c1)Cc1ccccc1-2	gamma_single	Pyruvate dehydrogenase kinase isoform 2,Homo sapiens										1.07143										1
InChI=1S/C20H21NO2/c22-20-7-3-4-10-21(20)11-12-23-17-8-9-19-16(14-17)13-15-5-1-2-6-18(15)19/h1-2,5-6,8-9,14H,3-4,7,10-13H2	4170	1	O=C1CCCCN1CCOc1ccc2c(c1)Cc1ccccc1-2	delta_single	Pyruvate dehydrogenase kinase isoform 2,Homo sapiens										1.07143										1
InChI=1S/C20H22N2O/c23-20-18-10-6-9-17(16-7-2-1-3-8-16)19(18)15-22(20)14-13-21-11-4-5-12-21/h1-3,6-10H,4-5,11-15H2/p+1	4173	1	O=C1c2cccc(-c3ccccc3)c2CN1CC[NH+]1CCCC1	gamma_fused	HERG,Homo sapiens										7.80952										1
InChI=1S/C20H22N2O/c23-20-19-12-15(13-21-17-7-3-1-4-8-17)11-16(19)14-22(20)18-9-5-2-6-10-18/h1-10,15-16,19,21H,11-14H2	4174	1	O=C1C2CC(CNc3ccccc3)CC2CN1c1ccccc1	gamma_fused	Hormone sensitive lipase,Homo sapiens										1.12766										1
InChI=1S/C20H22N2O/c23-20-19-15-21(13-16-7-3-1-4-8-16)14-17(19)11-12-22(20)18-9-5-2-6-10-18/h1-10,17,19H,11-15H2/p+1	4175	1	O=C1C2C[NH+](Cc3ccccc3)CC2CCN1c1ccccc1	delta_fused	Hormone sensitive lipase,Homo sapiens										1.12766										1
InChI=1S/C20H22N2O2/c23-20-18-7-4-12-21-19(18)24-14-13-22(20)17-10-8-16(9-11-17)15-5-2-1-3-6-15/h4,7-12,15H,1-3,5-6,13-14H2/p+1	4177	1	O=C1c2ccc[nH+]c2OCCN1c1ccc(C2CCCCC2)cc1	epsilon_fused	Diacylglycerol O-acyltransferase 1,Homo sapiens										1.17808										1
InChI=1S/C20H22N2O3S/c23-20-19-14-21(26(24,25)15-16-7-3-1-4-8-16)13-17(19)11-12-22(20)18-9-5-2-6-10-18/h1-10,17,19H,11-15H2	4178	1	O=C1C2CN(S(=O)(=O)Cc3ccccc3)CC2CCN1c1ccccc1	delta_fused	Hormone sensitive lipase,Homo sapiens										1.12766										1
InChI=1S/C20H23N3O/c24-20-19-4-3-17(16-5-8-21-9-6-16)15-18(19)7-12-23(20)14-13-22-10-1-2-11-22/h3-6,8-9,15H,1-2,7,10-14H2/p+1	4182	1	O=C1c2ccc(-c3ccncc3)cc2CCN1CC[NH+]1CCCC1	delta_fused	HERG,Homo sapiens										7.80952										1
InChI=1S/C20H23N3O2/c24-20-18-7-6-17(25-19-5-1-2-9-21-19)15-16(18)8-12-23(20)14-13-22-10-3-4-11-22/h1-2,5-7,9,15H,3-4,8,10-14H2/p+1	4185	1	O=C1c2ccc(Oc3ccccn3)cc2CCN1CC[NH+]1CCCC1	delta_fused	HERG,Homo sapiens										7.80952										1
InChI=1S/C20H23N3O2/c24-20-19-6-5-17(25-18-4-3-8-21-15-18)14-16(19)7-11-23(20)13-12-22-9-1-2-10-22/h3-6,8,14-15H,1-2,7,9-13H2/p+1	4186	1	O=C1c2ccc(Oc3cccnc3)cc2CCN1CC[NH+]1CCCC1	delta_fused	HERG,Homo sapiens										7.80952										1
InChI=1S/C20H23N3O3S/c24-20-15(19-21-16-5-1-2-7-18(16)27(25,26)22-19)12-14-4-3-6-17(14)23(20)11-10-13-8-9-13/h1-2,5,7,12-14,17H,3-4,6,8-11H2,(H,21,22)	4187	1	O=C1C(C2=NS(=O)(=O)c3ccccc3N2)=CC2CCCC2N1CCC1CC1	delta_fused	Hepatitis C virus,Hepatitis C virus										1.17526										1
InChI=1S/C20H23N3O3S/c24-20-15(19-21-16-8-1-2-10-18(16)27(25,26)22-19)11-14-7-4-9-17(14)23(20)12-13-5-3-6-13/h1-2,8,10-11,13-14,17H,3-7,9,12H2,(H,21,22)	4188	1	O=C1C(C2=NS(=O)(=O)c3ccccc3N2)=CC2CCCC2N1CC1CCC1	delta_fused	Hepatitis C virus,Hepatitis C virus										1.17526										1
InChI=1S/C20H23N3O4S2/c24-19(23-10-11-28-14-23)13-22-9-3-6-18(20(22)25)21-29(26,27)17-8-7-15-4-1-2-5-16(15)12-17/h1-2,4-5,7-8,12,18,21H,3,6,9-11,13-14H2	4191	1	O=C(CN1CCCC(NS(=O)(=O)c2ccc3ccccc3c2)C1=O)N1CCSC1	delta_single	Coagulation factor X,Homo sapiens										1.67391										1
InChI=1S/C20H24N4O3/c25-19-5-1-2-10-24(19)17-14-15(23-11-8-21-9-12-23)6-7-16(17)22-20(26)18-4-3-13-27-18/h3-4,6-7,13-14,21H,1-2,5,8-12H2,(H,22,26)/p+1	4196	1	O=C(Nc1ccc(N2CC[NH2+]CC2)cc1N1CCCCC1=O)c1ccco1	delta_single	Macrophage colony stimulating factor receptor,Homo sapiens										1.25										1
InChI=1S/C20H24N4O3S/c25-20-16-21-10-11-24(20)18-6-8-19(9-7-18)28(26,27)23-14-12-22(13-15-23)17-4-2-1-3-5-17/h1-9,21H,10-16H2/p+1	4197	1	O=C1C[NH2+]CCN1c1ccc(S(=O)(=O)N2CCN(c3ccccc3)CC2)cc1	delta_single	11-beta-hydroxysteroid dehydrogenase 1,Homo sapiens										1.21212										1
InChI=1S/C20H25N5O3/c21-20(22-15-5-6-17-14(12-15)7-11-28-17)23-16-4-3-10-25(19(16)27)13-18(26)24-8-1-2-9-24/h5-7,11-12,16H,1-4,8-10,13H2,(H3,21,22,23)	4202	1	N=C(Nc1ccc2occc2c1)NC1CCCN(CC(=O)N2CCCC2)C1=O	delta_single	Coagulation factor X,Homo sapiens										1.67391										1
InChI=1S/C20H28N4O2/c25-20-8-4-5-9-24(20)15-17-14-19(26-21-17)16-22-10-12-23(13-11-22)18-6-2-1-3-7-18/h1-3,6-7,19H,4-5,8-16H2/p+1	4209	1	O=C1CCCCN1CC1=NOC(C[NH+]2CCN(c3ccccc3)CC2)C1	delta_single	Rattus norvegicus,Rattus norvegicus										2.39726										1
InChI=1S/C20H29N3O3/c24-19(8-4-7-18-5-2-1-3-6-18)23-12-11-22(20(25)17-23)10-9-21-13-15-26-16-14-21/h1-3,5-6H,4,7-17H2/p+1	4212	1	O=C1CN(C(=O)CCCc2ccccc2)CCN1CC[NH+]1CCOCC1	delta_single	Dipeptidyl peptidase IV,Homo sapiens										1.16667										1
InChI=1S/C20H30N4O2/c25-19(23-14-17-3-1-9-22-13-17)15-24-12-2-4-18(20(24)26)6-5-16-7-10-21-11-8-16/h1,3,9,13,16,18,21H,2,4-8,10-12,14-15H2,(H,23,25)/p+1	4214	1	O=C(CN1CCCC(CCC2CC[NH2+]CC2)C1=O)NCc1cccnc1	delta_single	Integrin alpha-IIb/beta-3,Homo sapiens										1.70213										1
InChI=1S/C20H30N4O2/c25-19(23-15-17-3-1-8-22-14-17)13-18-4-2-11-24(20(18)26)12-7-16-5-9-21-10-6-16/h1,3,8,14,16,18,21H,2,4-7,9-13,15H2,(H,23,25)/p+1	4215	1	O=C(CC1CCCN(CCC2CC[NH2+]CC2)C1=O)NCc1cccnc1	delta_single	Integrin alpha-IIb/beta-3,Homo sapiens										1.70213										1
InChI=1S/C21H14N2O2/c24-20(15-7-6-12-22-14-15)13-18-17-10-4-5-11-19(17)23(21(18)25)16-8-2-1-3-9-16/h1-14H/b18-13+	4216	1	O=C(/C=C1/C(=O)N(c2ccccc2)c2ccccc21)c1cccnc1	gamma_fused	Protein-glutamine gamma-glutamyltransferase,Homo sapiens										3.33333										1
InChI=1S/C21H14N6O4/c28-18-15-6-2-1-4-13(15)10-27(18)11-21(19(29)24-20(30)25-21)9-8-14-5-3-7-16(23-14)17-26-22-12-31-17/h1-7,12H,10-11H2,(H2,24,25,29,30)	4219	1	O=C1NC(=O)C(C#Cc2cccc(-c3nnco3)n2)(CN2Cc3ccccc3C2=O)N1	gamma_fused	TNF-alpha,Homo sapiens										1.40099										1
InChI=1S/C21H14N6O4/c28-18-16-4-2-1-3-14(16)10-27(18)11-21(19(29)24-20(30)25-21)6-5-13-7-15(9-22-8-13)17-23-12-31-26-17/h1-4,7-9,12H,10-11H2,(H2,24,25,29,30)	4220	1	O=C1NC(=O)C(C#Cc2cncc(-c3ncon3)c2)(CN2Cc3ccccc3C2=O)N1	gamma_fused	TNF-alpha,Homo sapiens										1.40099										1
InChI=1S/C21H15N3O/c25-21-18-5-1-2-6-20(18)23-12-17-11-16(13-24(17)21)14-7-8-19-15(10-14)4-3-9-22-19/h1-10,12-13,17H,11H2	4221	1	O=C1c2ccccc2N=CC2CC(c3ccc4ncccc4c3)=CN12	epsilon_fused	K562,Homo sapiens										1.55462										1
InChI=1S/C21H15N3O/c25-21-18-6-2-4-8-20(18)23-12-17-10-16(13-24(17)21)15-9-14-5-1-3-7-19(14)22-11-15/h1-9,11-13,17H,10H2	4222	1	O=C1c2ccccc2N=CC2CC(c3cnc4ccccc4c3)=CN12	epsilon_fused	K562,Homo sapiens										1.55462										1
InChI=1S/C21H15N5O/c27-21-19-18(13-25(24-19)17-11-22-14-23-12-17)20(15-7-3-1-4-8-15)26(21)16-9-5-2-6-10-16/h1-14,20H	4224	1	O=C1c2nn(-c3cncnc3)cc2C(c2ccccc2)N1c1ccccc1	gamma_fused	p53-binding protein Mdm-2,Homo sapiens										1.24174										1
InChI=1S/C21H15N5O2/c27-16-11-14(12-22-25-16)20-23-17-18(24-20)21(28)26(15-9-5-2-6-10-15)19(17)13-7-3-1-4-8-13/h1-12,19H,(H,23,24)(H,25,27)	4225	1	O=C1c2nc(-c3cn[nH]c(=O)c3)[nH]c2C(c2ccccc2)N1c1ccccc1	gamma_fused	p53-binding protein Mdm-2,Homo sapiens										1.24174										1
InChI=1S/C21H15N5O2/c27-18-7-6-16(12-23-18)26-20(14-4-2-1-3-5-14)17-13-25(24-19(17)21(26)28)15-8-10-22-11-9-15/h1-13,20H,(H,23,27)	4226	1	O=C1c2nn(-c3ccncc3)cc2C(c2ccccc2)N1c1ccc(=O)[nH]c1	gamma_fused	p53-binding protein Mdm-2,Homo sapiens										1.24174										1
InChI=1S/C21H15N5O2/c27-20-17-16(24-19(25-17)15-11-12-22-21(28)23-15)18(13-7-3-1-4-8-13)26(20)14-9-5-2-6-10-14/h1-12,18H,(H,24,25)(H,22,23,28)	4227	1	O=C1c2nc(-c3cc[nH]c(=O)n3)[nH]c2C(c2ccccc2)N1c1ccccc1	gamma_fused	p53-binding protein Mdm-2,Homo sapiens										1.24174										1
InChI=1S/C21H15N5O5S/c27-16-15(22-19(30)23-16)14-6-5-12(32-14)7-8-21(18(29)24-20(31)25-21)10-26-9-11-3-1-2-4-13(11)17(26)28/h1-6,15H,9-10H2,(H2,22,23,27,30)(H2,24,25,29,31)	4229	1	O=C1NC(=O)C(c2ccc(C#CC3(CN4Cc5ccccc5C4=O)NC(=O)NC3=O)s2)N1	gamma_fused	TNF-alpha,Homo sapiens										1.40099										1
InChI=1S/C21H15N5O5S/c27-16-15(22-19(30)23-16)14-7-11(9-32-14)5-6-21(18(29)24-20(31)25-21)10-26-8-12-3-1-2-4-13(12)17(26)28/h1-4,7,9,15H,8,10H2,(H2,22,23,27,30)(H2,24,25,29,31)	4230	1	O=C1NC(=O)C(c2cc(C#CC3(CN4Cc5ccccc5C4=O)NC(=O)NC3=O)cs2)N1	gamma_fused	TNF-alpha,Homo sapiens										1.40099										1
InChI=1S/C21H15NO5/c23-20-21(11-25-17-9-19-18(8-15(17)21)26-12-27-19)14-5-1-2-6-16(14)22(20)10-13-4-3-7-24-13/h1-9H,10-12H2	4232	1	O=C1N(Cc2ccco2)c2ccccc2C12COc1cc3c(cc12)OCO3	gamma_fused	Sodium channel protein type IX alpha subunit,Homo sapiens										1.66234										1
InChI=1S/C21H17N3O/c25-21-18-5-1-2-6-20(18)23-12-17-11-16(13-24(17)21)14-7-8-19-15(10-14)4-3-9-22-19/h1-10,13,17,23H,11-12H2	4244	1	O=C1c2ccccc2NCC2CC(c3ccc4ncccc4c3)=CN12	epsilon_fused	K562,Homo sapiens										1.55462										1
InChI=1S/C21H17N3O3/c25-18-10-21(16-8-4-5-9-17(16)23-20(21)26)13-24(18)12-15-11-22-27-19(15)14-6-2-1-3-7-14/h1-9,11H,10,12-13H2,(H,23,26)	4249	1	O=C1CC2(CN1Cc1cnoc1-c1ccccc1)C(=O)Nc1ccccc12	gamma_spiro	G protein-coupled receptor 44,Homo sapiens										1.08333										1
InChI=1S/C21H17N5O/c27-21-18-17(24-20(25-18)15-11-22-13-23-12-15)19(14-7-3-1-4-8-14)26(21)16-9-5-2-6-10-16/h1-13,17-19H,(H,24,25)	4250	1	O=C1C2N=C(c3cncnc3)NC2C(c2ccccc2)N1c1ccccc1	gamma_fused	p53-binding protein Mdm-2,Homo sapiens										1.24174										1
InChI=1S/C21H17N5O/c27-21-20-19(10-12-25(21)17-6-2-1-3-7-17)23-24-26(20)14-15-8-9-18-16(13-15)5-4-11-22-18/h1-9,11,13H,10,12,14H2	4251	1	O=C1c2c(nnn2Cc2ccc3ncccc3c2)CCN1c1ccccc1	delta_fused	Hepatocyte growth factor receptor,Homo sapiens										1.95833										1
InChI=1S/C21H17N7O/c29-21-18-17(24-20(25-18)14-9-22-11-23-10-14)19(13-4-2-1-3-5-13)28(21)16-8-15(26-27-16)12-6-7-12/h1-5,8-12,19H,6-7H2,(H,24,25)(H,26,27)	4254	1	O=C1c2nc(-c3cncnc3)[nH]c2C(c2ccccc2)N1c1cc(C2CC2)n[nH]1	gamma_fused	p53-binding protein Mdm-2,Homo sapiens										1.24174										1
InChI=1S/C21H17N7O2S/c29-20-16(22-17-9-14(24-26-17)11-4-5-11)8-15(25-27-20)13-2-1-3-18(23-13)28-10-12-6-7-31-19(12)21(28)30/h1-3,6-9,11H,4-5,10H2,(H,27,29)(H2,22,24,25,26)	4255	1	O=C1c2sccc2CN1c1cccc(-c2cc(Nc3cc(C4CC4)[nH]n3)c(=O)[nH]n2)n1	gamma_fused	Tyrosine-protein kinase BTK,Homo sapiens										1.07317										1
InChI=1S/C21H17NO3/c23-19(20-11-6-12-25-20)13-17-16-9-4-5-10-18(16)22(21(17)24)14-15-7-2-1-3-8-15/h1-12,17H,13-14H2	4256	1	O=C(CC1C(=O)N(Cc2ccccc2)c2ccccc21)c1ccco1	gamma_fused	Sodium channel protein type IX alpha subunit,Homo sapiens										1.66234										1
InChI=1S/C21H18N2O/c24-21-18-12-19-16(11-17(18)20-7-4-8-23(20)21)10-15(13-22-19)9-14-5-2-1-3-6-14/h1-3,5-6,10-13,20H,4,7-9H2	4257	1	O=C1c2cc3ncc(Cc4ccccc4)cc3cc2C2CCCN12	gamma_fused	Integrase,Human immunodeficiency virus 1										2.96078										1
InChI=1S/C21H18N4O3/c26-20-15-13-24(10-4-8-14-6-2-1-3-7-14)21(27)19(15)22-18-12-16(23-25(18)20)17-9-5-11-28-17/h1-3,5-7,9,11-12,22H,4,8,10,13H2	4265	1	O=C1c2[nH]c3cc(-c4ccco4)nn3c(=O)c2CN1CCCc1ccccc1	gamma_fused	Serine/threonine-protein kinase Aurora-A,Homo sapiens										2.35714										1
InChI=1S/C21H18N4O3S2/c26-21-17(24-30(27,28)20-11-18-19(29-20)2-1-7-23-18)6-9-25(21)13-14-3-4-15-5-8-22-12-16(15)10-14/h1-5,7-8,10-12,17,24H,6,9,13H2	4266	1	O=C1C(NS(=O)(=O)c2cc3ncccc3s2)CCN1Cc1ccc2ccncc2c1	gamma_single	Coagulation factor X,Homo sapiens										1.67391										1
InChI=1S/C21H19N3O/c25-21-16-9-5-8-15(17(16)13-24(21)14-6-1-2-7-14)20-12-22-18-10-3-4-11-19(18)23-20/h3-5,8-12,14H,1-2,6-7,13H2	4268	1	O=C1c2cccc(-c3cnc4ccccc4n3)c2CN1C1CCCC1	gamma_fused	Cyclin-dependent kinase 4,Homo sapiens										1.04167										1
InChI=1S/C21H19N3O2/c25-20-21(26)24(15-14-23(20)16-17-8-2-1-3-9-17)19-11-5-4-10-18(19)22-12-6-7-13-22/h1-13H,14-16H2	4269	1	O=C1C(=O)N(c2ccccc2-n2cccc2)CCN1Cc1ccccc1	delta_single	P2X purinoceptor 7,Homo sapiens										1.08088										1
InChI=1S/C21H19N3O3S/c25-20-16(19-22-17-8-4-5-9-18(17)28(26,27)23-19)12-21(10-11-21)14-24(20)13-15-6-2-1-3-7-15/h1-9,12H,10-11,13-14H2,(H,22,23)	4275	1	O=C1C(C2=NS(=O)(=O)c3ccccc3N2)=CC2(CC2)CN1Cc1ccccc1	delta_spiro	Hepatitis C virus,Hepatitis C virus										1.17526										1
InChI=1S/C21H19N5O3S2/c27-21-17(6-10-26(21)13-16-11-15-5-9-23-12-18(15)24-16)25-31(28,29)20-2-1-19(30-20)14-3-7-22-8-4-14/h1-5,7-9,11-12,17,23,25H,6,10,13H2	4279	1	O=C1C(NS(=O)(=O)c2ccc(-c3ccncc3)s2)CCN1Cc1cc2cc[nH]cc-2n1	gamma_single	Coagulation factor X,Oryctolagus cuniculus										2.47826										1
InChI=1S/C21H20N4O/c26-21-19-18(14-24(23-19)17-11-12-22-13-17)20(15-7-3-1-4-8-15)25(21)16-9-5-2-6-10-16/h1-10,14,17,20,22H,11-13H2	4291	1	O=C1c2nn(C3CCNC3)cc2C(c2ccccc2)N1c1ccccc1	gamma_fused	p53-binding protein Mdm-2,Homo sapiens										1.24174										1
InChI=1S/C21H20N4O2/c26-19-18-7-6-17(24-11-10-22-15-24)20(27)25(18)13-12-23(19)14-21(8-9-21)16-4-2-1-3-5-16/h1-7,10-11,15H,8-9,12-14H2	4292	1	O=C1c2ccc(-n3ccnc3)c(=O)n2CCN1CC1(c2ccccc2)CC1	delta_fused	Gamma-secretase,Homo sapiens										1.34146										1
InChI=1S/C21H20N4O2/c26-20(24-17-7-6-16-14-22-9-8-15(16)12-17)13-19-21(27)25(11-10-23-19)18-4-2-1-3-5-18/h1-9,12,14,19,23H,10-11,13H2,(H,24,26)	4293	1	O=C(CC1NCCN(c2ccccc2)C1=O)Nc1ccc2cnccc2c1	delta_single	Coagulation factor IX,Homo sapiens										1.5										1
InChI=1S/C21H20N4O3/c26-19-12-20(27)25(16-5-6-17-18(11-16)23-13-22-17)21(19)14-1-3-15(4-2-14)24-7-9-28-10-8-24/h1-6,11,13,21H,7-10,12H2,(H,22,23)	4296	1	O=C1CC(=O)N(c2ccc3nc[nH]c3c2)C1c1ccc(N2CCOCC2)cc1	gamma_single	Glutaminyl-peptide cyclotransferase,Homo sapiens										1.4										1
InChI=1S/C21H20N4O3S/c26-21-8-7-20(25(21)17-5-6-18-19(13-17)23-14-22-18)15-1-3-16(4-2-15)24-9-11-29(27,28)12-10-24/h1-8,13-14,20H,9-12H2,(H,22,23)	4297	1	O=C1C=CC(c2ccc(N3CCS(=O)(=O)CC3)cc2)N1c1ccc2nc[nH]c2c1	gamma_single	Glutaminyl-peptide cyclotransferase,Homo sapiens										1.4										1
InChI=1S/C21H20N4O6/c26-16(18(27)23-11-14-5-2-1-3-6-14)13-24-21(30)31-17-8-10-25(20(17)29)19(28)15-7-4-9-22-12-15/h1-7,9,12,17H,8,10-11,13H2,(H,23,27)(H,24,30)	4298	1	O=C(NCC(=O)C(=O)NCc1ccccc1)OC1CCN(C(=O)c2cccnc2)C1=O	gamma_single	Cathepsin K,Homo sapiens										1.20588										1
InChI=1S/C21H20N4O6/c26-19-12-29-8-7-24(19)13-4-5-15-17(9-13)30-11-16-18(31-21(28)25(15)16)10-23-20(27)14-3-1-2-6-22-14/h1-6,9,16,18H,7-8,10-12H2,(H,23,27)	4299	1	O=C(NCC1OC(=O)N2c3ccc(N4CCOCC4=O)cc3OCC12)c1ccccn1	delta_single	Coagulation factor X,Homo sapiens										1.67391										1
InChI=1S/C21H20N4O7S/c26-18-11-30-6-5-24(18)12-3-4-13-15(8-12)31-10-14-16(32-21(29)25(13)14)9-22-19(27)20(28)23-17-2-1-7-33-17/h1-4,7-8,14,16H,5-6,9-11H2,(H,22,27)(H,23,28)	4300	1	O=C(NCC1OC(=O)N2c3ccc(N4CCOCC4=O)cc3OCC12)C(=O)Nc1cccs1	delta_single	Coagulation factor X,Homo sapiens										1.67391										1
InChI=1S/C21H20N4OS/c26-21-6-5-16(15-27-17-7-10-22-11-8-17)25(21)14-13-24-20-9-12-23-19-4-2-1-3-18(19)20/h1-12,16H,13-15H2,(H,23,24)/p+1	4301	1	O=C1C=CC(CSc2ccncc2)N1CCNc1cc[nH+]c2ccccc12	gamma_single	Plasmodium falciparum,Plasmodium falciparum										2.32984										1
InChI=1S/C21H20N4OS/c26-21-9-8-16(15-27-20-7-3-4-11-24-20)25(21)14-13-23-19-10-12-22-18-6-2-1-5-17(18)19/h1-12,16H,13-15H2,(H,22,23)/p+1	4302	1	O=C1C=CC(CSc2ccccn2)N1CCNc1cc[nH+]c2ccccc12	gamma_single	Plasmodium falciparum,Plasmodium falciparum										2.32984										1
InChI=1S/C21H20N4OS/c26-21-9-8-16(15-27-20-7-3-4-11-24-20)25(21)14-13-23-19-10-12-22-18-6-2-1-5-17(18)19/h1-12,16H,13-15H2,(H,22,23)/p+2	4303	1	O=C1C=CC(CSc2cccc[nH+]2)N1CCNc1cc[nH+]c2ccccc12	gamma_single	Plasmodium falciparum,Plasmodium falciparum										2.32984										1
InChI=1S/C21H20N6O/c28-20-18-10-16(7-6-14(18)13-27(20)17-11-22-12-17)25-21-23-9-8-19(26-21)24-15-4-2-1-3-5-15/h1-10,17,22H,11-13H2,(H2,23,24,25,26)	4304	1	O=C1c2cc(Nc3nccc(Nc4ccccc4)n3)ccc2CN1C1CNC1	gamma_fused	ALK tyrosine kinase receptor,Homo sapiens										1.25										1
InChI=1S/C21H21N3O/c25-21-19-12-11-17(10-9-16-6-4-5-14-22-16)23-20(19)13-15-24(21)18-7-2-1-3-8-18/h4-6,11-12,14,18H,1-3,7-8,13,15H2	4307	1	O=C1c2ccc(C#Cc3ccccn3)nc2CCN1C1CCCCC1	delta_fused	Metabotropic glutamate receptor 5,Homo sapiens										1.21229										1
InChI=1S/C21H21N3O2/c25-20-12-16(21(26)23-17-6-2-1-3-7-17)14-24(20)11-10-15-13-22-19-9-5-4-8-18(15)19/h1-9,13,16,22H,10-12,14H2,(H,23,26)	4308	1	O=C(Nc1ccccc1)C1CC(=O)N(CCc2c[nH]c3ccccc23)C1	gamma_single	Monoglyceride lipase,Homo sapiens										1.52381										1
InChI=1S/C21H21N3O3/c25-17-11-5-10-16-19(17)18(21(27)23(16)13-8-4-9-13)15-12-22-24(20(15)26)14-6-2-1-3-7-14/h1-3,6-7,12-13,18,22H,4-5,8-11H2	4309	1	O=C1CCCC2=C1C(c1c[nH]n(-c3ccccc3)c1=O)C(=O)N2C1CCC1	gamma_fused	Elongation of very long chain fatty acids protein 6,Homo sapiens										1.36										1
InChI=1S/C21H21N3O4S2/c25-19-5-1-2-8-23(19)13-6-7-14-18(10-13)30-12-15-16(28-21(27)24(14)15)11-22-20(26)17-4-3-9-29-17/h3-4,6-7,9-10,15-16H,1-2,5,8,11-12H2,(H,22,26)	4311	1	O=C(NCC1OC(=O)N2c3ccc(N4CCCCC4=O)cc3SCC12)c1cccs1	delta_single	Coagulation factor X,Homo sapiens										1.67391										1
InChI=1S/C21H21N3O6S2/c25-19-5-1-2-8-23(19)13-6-7-14-18(10-13)32(28,29)12-15-16(30-21(27)24(14)15)11-22-20(26)17-4-3-9-31-17/h3-4,6-7,9-10,15-16H,1-2,5,8,11-12H2,(H,22,26)	4312	1	O=C(NCC1OC(=O)N2c3ccc(N4CCCCC4=O)cc3S(=O)(=O)CC12)c1cccs1	delta_single	Coagulation factor X,Homo sapiens										1.67391										1
InChI=1S/C21H21N5O/c27-21-18-17(24-20(25-18)15-11-22-13-23-12-15)19(14-7-3-1-4-8-14)26(21)16-9-5-2-6-10-16/h2,5-6,9-14,19H,1,3-4,7-8H2,(H,24,25)	4315	1	O=C1c2nc(-c3cncnc3)[nH]c2C(C2CCCCC2)N1c1ccccc1	gamma_fused	p53-binding protein Mdm-2,Homo sapiens										1.24174										1
InChI=1S/C21H21N5O2/c27-18-4-3-11-26(18)15-7-5-14(6-8-15)16-12-17-19(21(28)23-13-22-17)20(24-16)25-9-1-2-10-25/h5-8,12-13H,1-4,9-11H2,(H,22,23,28)	4316	1	O=C1CCCN1c1ccc(-c2cc3nc[nH]c(=O)c3c(N3CCCC3)n2)cc1	gamma_single	Tyrosine-protein kinase SYK,Homo sapiens										1.1										1
InChI=1S/C21H21NO2/c23-20-13-7-12-18-21(17-10-5-2-6-11-17)19(14-22(18)20)24-15-16-8-3-1-4-9-16/h1-11,13,18-19,21H,12,14-15H2	4320	1	O=C1C=CCC2C(c3ccccc3)C(OCc3ccccc3)CN12	delta_fused	Neurokinin 1 receptor,Homo sapiens										1.14667										1
InChI=1S/C21H22N2O2/c24-20-14-19(21(25)22-15-18-10-5-2-6-11-18)16-23(20)13-7-12-17-8-3-1-4-9-17/h1-6,8-11,14H,7,12-13,15-16H2,(H,22,25)	4324	1	O=C(NCc1ccccc1)C1=CC(=O)N(CCCc2ccccc2)C1	gamma_single	Integrase,Human immunodeficiency virus 1										2.96078										1
InChI=1S/C21H22N2O2/c24-20-21(25)23(14-13-22(20)15-16-7-2-1-3-8-16)19-12-6-10-17-9-4-5-11-18(17)19/h1-3,6-8,10,12H,4-5,9,11,13-15H2	4325	1	O=C1C(=O)N(c2cccc3c2CCCC3)CCN1Cc1ccccc1	delta_single	P2X purinoceptor 7,Homo sapiens										1.08088										1
InChI=1S/C21H22N2O4/c24-20-9-7-17(23(20)13-16-4-2-1-3-5-16)21(25)22-11-10-15-6-8-18-19(12-15)27-14-26-18/h1-6,8,12,17H,7,9-11,13-14H2,(H,22,25)	4329	1	O=C(NCCc1ccc2c(c1)OCO2)C1CCC(=O)N1Cc1ccccc1	gamma_single	Integrin alpha-4/beta-1,Homo sapiens										1.21818										1
InChI=1S/C21H22N4O3/c26-20-2-1-8-25(20)17-5-9-23(10-6-17)21(27)18-13-24-12-15(3-4-19(24)22-18)16-7-11-28-14-16/h3-4,7,11-14,17H,1-2,5-6,8-10H2	4333	1	O=C(c1cn2cc(-c3ccoc3)ccc2n1)N1CCC(N2CCCC2=O)CC1	gamma_single	Hepatitis C virus,Hepatitis C virus										1.17526										1
InChI=1S/C21H22N7O2/c29-21-18-12-22-13-23-20(18)30-10-9-28(21)17-7-5-16(6-8-17)15-3-1-14(2-4-15)11-19-24-26-27-25-19/h5-8,12-15H,1-4,9-11H2/q-1	4335	1	O=C1c2cncnc2OCCN1c1ccc(C2CCC(Cc3nn[n-]n3)CC2)cc1	epsilon_fused	Diacylglycerol O-acyltransferase 1,Homo sapiens										1.17808										1
InChI=1S/C21H23N3O2/c25-20(22-17-7-3-1-4-8-17)15-23-13-16-11-12-24(21(26)19(16)14-23)18-9-5-2-6-10-18/h1-10,16,19H,11-15H2,(H,22,25)/p+1	4338	1	O=C(C[NH+]1CC2CCN(c3ccccc3)C(=O)C2C1)Nc1ccccc1	delta_fused	Hormone sensitive lipase,Homo sapiens										1.12766										1
InChI=1S/C21H23N3O2/c25-20-21(26)24(14-13-23(20)16-17-7-2-1-3-8-17)19-10-6-9-18(15-19)22-11-4-5-12-22/h1-3,6-10,15H,4-5,11-14,16H2	4341	1	O=C1C(=O)N(c2cccc(N3CCCC3)c2)CCN1Cc1ccccc1	delta_single	P2X purinoceptor 7,Homo sapiens										1.08088										1
InChI=1S/C21H23N3O2/c25-20-21(26)24(15-14-23(20)16-17-8-2-1-3-9-17)19-11-5-4-10-18(19)22-12-6-7-13-22/h1-5,8-11H,6-7,12-16H2	4342	1	O=C1C(=O)N(c2ccccc2N2CCCC2)CCN1Cc1ccccc1	delta_single	P2X purinoceptor 7,Homo sapiens										1.08088										1
InChI=1S/C21H23N5O2/c27-19-13-24-20-21(26(19)8-4-14-5-9-28-10-6-14)25-18(12-23-20)15-1-2-17-16(11-15)3-7-22-17/h1-3,7,11-12,14,22H,4-6,8-10,13H2,(H,23,24)	4346	1	O=C1CNc2ncc(-c3ccc4[nH]ccc4c3)nc2N1CCC1CCOCC1	delta_fused	Serine/threonine-protein kinase mTOR,Homo sapiens										1.04545										1
InChI=1S/C21H23N5O2/c27-20(12-6-9-17-7-2-1-3-8-17)24-13-14-25(21(28)15-24)16-26-19-11-5-4-10-18(19)22-23-26/h1-5,7-8,10-11H,6,9,12-16H2	4347	1	O=C(CCCc1ccccc1)N1CCN(Cn2nnc3ccccc32)C(=O)C1	delta_single	Dipeptidyl peptidase IV,Homo sapiens										1.16667										1
InChI=1S/C21H23N7O/c29-19-15-22-12-13-28(19)17-14-26-21(27-20(17)16-6-2-1-3-7-16)25-11-10-24-18-8-4-5-9-23-18/h1-9,14,22H,10-13,15H2,(H,23,24)(H,25,26,27)/p+1	4348	1	O=C1C[NH2+]CCN1c1cnc(NCCNc2ccccn2)nc1-c1ccccc1	delta_single	Glycogen synthase kinase-3 beta,Homo sapiens										46										1
InChI=1S/C21H23NO/c23-21-11-5-7-17-22(21)16-6-4-8-18-12-14-20(15-13-18)19-9-2-1-3-10-19/h1-3,5,9-15H,4,6-8,16-17H2	4350	1	O=C1C=CCCN1CCCCc1ccc(-c2ccccc2)cc1	delta_single	Histone deacetylase,Homo sapiens										1.6										1
InChI=1S/C21H23NO/c23-21-19(16-10-4-1-5-11-16)20(17-12-6-2-7-13-17)22(21)18-14-8-3-9-15-18/h2-3,6-9,12-16,19-20H,1,4-5,10-11H2	4351	1	O=C1C(C2CCCCC2)C(c2ccccc2)N1c1ccccc1	beta_single	MCF7,Homo sapiens										4.16514										1
InChI=1S/C21H23NO2/c23-21-8-3-4-11-22(21)12-5-13-24-18-9-10-20-17(15-18)14-16-6-1-2-7-19(16)20/h1-2,6-7,9-10,15H,3-5,8,11-14H2	4354	1	O=C1CCCCN1CCCOc1ccc2c(c1)Cc1ccccc1-2	delta_single	Pyruvate dehydrogenase kinase isoform 2,Homo sapiens										1.07143										1
InChI=1S/C21H24N2O/c24-21-20-10-6-9-18(17-7-2-1-3-8-17)19(20)11-14-23(21)16-15-22-12-4-5-13-22/h1-3,6-10H,4-5,11-16H2/p+1	4356	1	O=C1c2cccc(-c3ccccc3)c2CCN1CC[NH+]1CCCC1	delta_fused	HERG,Homo sapiens										7.80952										1
InChI=1S/C21H24N2O/c24-21-20-16-19(17-6-2-1-3-7-17)9-8-18(20)10-13-23(21)15-14-22-11-4-5-12-22/h1-3,6-9,16H,4-5,10-15H2/p+1	4357	1	O=C1c2cc(-c3ccccc3)ccc2CCN1CC[NH+]1CCCC1	delta_fused	HERG,Homo sapiens										7.80952										1
InChI=1S/C21H24N2O/c24-21-20-16-22(13-11-17-7-3-1-4-8-17)15-18(20)12-14-23(21)19-9-5-2-6-10-19/h1-10,18,20H,11-16H2/p+1	4358	1	O=C1C2C[NH+](CCc3ccccc3)CC2CCN1c1ccccc1	delta_fused	Hormone sensitive lipase,Homo sapiens										1.12766										1
InChI=1S/C21H24N2O2/c24-21-20-9-8-19(25-18-6-2-1-3-7-18)16-17(20)10-13-23(21)15-14-22-11-4-5-12-22/h1-3,6-9,16H,4-5,10-15H2/p+1	4359	1	O=C1c2ccc(Oc3ccccc3)cc2CCN1CC[NH+]1CCCC1	delta_fused	HERG,Homo sapiens										7.80952										1
InChI=1S/C21H24N6O2/c28-18-8-4-10-27(18)11-5-9-22-21(29)17-13-24-20-16(14-25-26-20)19(17)23-12-15-6-2-1-3-7-15/h1-3,6-7,13-14H,4-5,8-12H2,(H,22,29)(H2,23,24,25,26)/p+1	4364	1	O=C(NCCCN1CCCC1=O)c1c[nH+]c2[nH]ncc2c1NCc1ccccc1	gamma_single	Phosphodiesterase 5A,Homo sapiens										1.25										1
InChI=1S/C21H25N3O/c25-21-20-10-5-4-7-18(20)17-24(21)12-6-11-22-13-15-23(16-14-22)19-8-2-1-3-9-19/h1-5,7-10H,6,11-17H2/p+1	4366	1	O=C1c2ccccc2CN1CCC[NH+]1CCN(c2ccccc2)CC1	gamma_fused	Poly [ADP-ribose] polymerase-1,Mus musculus										1.56522										1
InChI=1S/C21H25N3O3S/c25-21-16(20-22-17-10-4-5-12-19(17)28(26,27)23-20)13-14-7-6-11-18(14)24(21)15-8-2-1-3-9-15/h4-5,10,12-15,18H,1-3,6-9,11H2,(H,22,23)	4368	1	O=C1C(C2=NS(=O)(=O)c3ccccc3N2)=CC2CCCC2N1C1CCCCC1	delta_fused	Hepatitis C virus,Hepatitis C virus										1.17526										1
InChI=1S/C21H25N3O3S/c25-21-17(20-22-18-6-1-2-7-19(18)28(26,27)23-20)12-15(11-10-14-8-9-14)13-24(21)16-4-3-5-16/h1-2,6-7,12,14-16H,3-5,8-11,13H2,(H,22,23)	4369	1	O=C1C(C2=NS(=O)(=O)c3ccccc3N2)=CC(CCC2CC2)CN1C1CCC1	delta_single	Hepatitis C virus,Hepatitis C virus										1.17526										1
InChI=1S/C21H25N3O5S/c25-20(23-10-12-29-13-11-23)15-24-9-3-6-19(21(24)26)22-30(27,28)18-8-7-16-4-1-2-5-17(16)14-18/h1-2,4-5,7-8,14,19,22H,3,6,9-13,15H2	4371	1	O=C(CN1CCCC(NS(=O)(=O)c2ccc3ccccc3c2)C1=O)N1CCOCC1	delta_single	Coagulation factor X,Homo sapiens										1.67391										1
InChI=1S/C21H26N4O2/c26-20-14-23(10-11-25(20)17-4-2-1-3-5-17)21(27)18-13-24-12-16(15-6-7-15)8-9-19(24)22-18/h8-9,12-13,15,17H,1-7,10-11,14H2	4375	1	O=C(c1cn2cc(C3CC3)ccc2n1)N1CCN(C2CCCCC2)C(=O)C1	delta_single	Hepatitis C virus,Hepatitis C virus										1.17526										1
InChI=1S/C21H27N5O2/c27-20(24-14-16-2-1-6-23-13-16)15-26-9-5-17-3-4-18(12-19(17)21(26)28)25-10-7-22-8-11-25/h1-4,6,12,22-23H,5,7-11,13-15H2,(H,24,27)/p+1	4382	1	O=C(CN1CCc2ccc(N3CC[NH2+]CC3)cc2C1=O)NCC1=CC=CNC1	delta_fused	Homo sapiens,Homo sapiens										1.31944										1
InChI=1S/C21H28N2O3/c24-20-19-4-2-1-3-16(19)15-23(20)18-7-11-22(12-8-18)17-5-9-21(10-6-17)25-13-14-26-21/h1-4,17-18H,5-15H2/p+1	4383	1	O=C1c2ccccc2CN1C1CC[NH+](C2CCC3(CC2)OCCO3)CC1	gamma_fused	Poly [ADP-ribose] polymerase-1,Mus musculus										1.56522										1
InChI=1S/C21H28N5O/c27-21-16-15-19(13-8-7-12-18-10-4-3-5-11-18)26(21)17-9-2-1-6-14-20-22-24-25-23-20/h3-5,8,10-11,13,19H,1-2,6-7,9,12,14-17H2/q-1/b13-8+	4385	1	O=C1CCC(/C=C/CCc2ccccc2)N1CCCCCCc1nnn[n-]1	gamma_single	Prostanoid EP4 receptor,Homo sapiens										1.38095										1
InChI=1S/C21H29N3O3/c25-19(23-14-17-9-5-2-6-10-17)15-24-18(13-20(24)26)21(27)22-12-11-16-7-3-1-4-8-16/h1,3-4,7-8,17-18H,2,5-6,9-15H2,(H,22,27)(H,23,25)	4388	1	O=C(CN1C(=O)CC1C(=O)NCCc1ccccc1)NCC1CCCCC1	beta_single	Human immunodeficiency virus type 1 protease,Human immunodeficiency virus 1										1.04878										1
InChI=1S/C22H15N5O3S/c28-19-17-4-2-1-3-15(17)10-27(19)12-22(20(29)25-21(30)26-22)6-5-14-7-16(9-23-8-14)18-11-31-13-24-18/h1-4,7-9,11,13H,10,12H2,(H2,25,26,29,30)	4389	1	O=C1NC(=O)C(C#Cc2cncc(-c3cscn3)c2)(CN2Cc3ccccc3C2=O)N1	gamma_fused	TNF-alpha,Homo sapiens										1.40099										1
InChI=1S/C22H16N2O/c25-22-20-9-3-4-11-21(20)23-13-17-12-16(14-24(17)22)19-10-5-7-15-6-1-2-8-18(15)19/h1-11,13-14,17H,12H2	4391	1	O=C1c2ccccc2N=CC2CC(c3cccc4ccccc34)=CN12	epsilon_fused	K562,Homo sapiens										1.55462										1
InChI=1S/C22H16N2O4S2/c25-18(23-30(28)19-10-5-13-29-19)12-11-16-8-4-9-17-20(16)24(22(27)21(17)26)14-15-6-2-1-3-7-15/h1-13,30H,14H2/b12-11+	4393	1	O=C(/C=C/c1cccc2c1N(Cc1ccccc1)C(=O)C2=O)N=[SH](=O)c1cccs1	gamma_fused	Prostanoid EP3 receptor,Homo sapiens										1.05										1
InChI=1S/C22H16N4O/c27-22-20-19(15-25(24-20)17-10-5-2-6-11-17)21(16-8-3-1-4-9-16)26(22)18-12-7-13-23-14-18/h1-15,21H	4394	1	O=C1c2nn(-c3ccccc3)cc2C(c2ccccc2)N1c1cccnc1	gamma_fused	p53-binding protein Mdm-2,Homo sapiens										1.24174										1
InChI=1S/C22H16N4O2/c27-21-16(12-7-13-23-21)26-19(14-8-3-1-4-9-14)17-18(22(26)28)25-20(24-17)15-10-5-2-6-11-15/h1-13,19H,(H,23,27)(H,24,25)	4395	1	O=C1c2nc(-c3ccccc3)[nH]c2C(c2ccccc2)N1c1ccc[nH]c1=O	gamma_fused	p53-binding protein Mdm-2,Homo sapiens										1.24174										1
InChI=1S/C22H16N6O3/c29-19-16-4-2-1-3-15(16)12-28(19)13-22(20(30)25-21(31)26-22)9-7-14-5-6-17(23-11-14)18-8-10-24-27-18/h1-6,8,10-11H,12-13H2,(H,24,27)(H2,25,26,30,31)	4397	1	O=C1NC(=O)C(C#Cc2ccc(-c3cc[nH]n3)nc2)(CN2Cc3ccccc3C2=O)N1	gamma_fused	TNF-alpha,Homo sapiens										1.40099										1
InChI=1S/C22H16N6O3/c29-19-17-4-2-1-3-15(17)12-28(19)13-22(20(30)25-21(31)26-22)7-5-14-9-16(11-23-10-14)18-6-8-24-27-18/h1-4,6,8-11H,12-13H2,(H,24,27)(H2,25,26,30,31)	4398	1	O=C1NC(=O)C(C#Cc2cncc(-c3cc[nH]n3)c2)(CN2Cc3ccccc3C2=O)N1	gamma_fused	TNF-alpha,Homo sapiens										1.40099										1
InChI=1S/C22H16N6O3/c29-19-17-4-2-1-3-16(17)11-28(19)12-22(20(30)25-21(31)26-22)10-9-14-5-7-15(8-6-14)18-23-13-24-27-18/h1-8,13H,11-12H2,(H,23,24,27)(H2,25,26,30,31)	4399	1	O=C1NC(=O)C(C#Cc2ccc(-c3nnc[nH]3)cc2)(CN2Cc3ccccc3C2=O)N1	gamma_fused	TNF-alpha,Homo sapiens										1.40099										1
InChI=1S/C22H16N6O3/c29-19-17-4-2-1-3-16(17)12-28(19)13-22(20(30)25-21(31)26-22)8-7-15-5-6-18(24-11-15)27-10-9-23-14-27/h1-6,9-11,14H,12-13H2,(H2,25,26,30,31)	4400	1	O=C1NC(=O)C(C#Cc2ccc(-n3ccnc3)nc2)(CN2Cc3ccccc3C2=O)N1	gamma_fused	TNF-alpha,Homo sapiens										1.40099										1
InChI=1S/C22H16N6O3/c29-19-18-4-2-1-3-15(18)12-28(19)13-22(20(30)26-21(31)27-22)6-5-14-7-16(9-23-8-14)17-10-24-25-11-17/h1-4,7-11H,12-13H2,(H,24,25)(H2,26,27,30,31)	4401	1	O=C1NC(=O)C(C#Cc2cncc(-c3cn[nH]c3)c2)(CN2Cc3ccccc3C2=O)N1	gamma_fused	TNF-alpha,Homo sapiens										1.40099										1
InChI=1S/C22H16N6O5/c29-17-16(24-20(32)25-17)15-6-5-12(9-23-15)7-8-22(19(31)26-21(33)27-22)11-28-10-13-3-1-2-4-14(13)18(28)30/h1-6,9,16H,10-11H2,(H2,24,25,29,32)(H2,26,27,31,33)	4404	1	O=C1NC(=O)C(c2ccc(C#CC3(CN4Cc5ccccc5C4=O)NC(=O)NC3=O)cn2)N1	gamma_fused	TNF-alpha,Homo sapiens										1.40099										1
InChI=1S/C22H18N4O3/c27-21-14-24(9-10-26(21)18-4-2-1-3-5-18)22(28)19-13-25-12-16(6-7-20(25)23-19)17-8-11-29-15-17/h1-8,11-13,15H,9-10,14H2	4417	1	O=C(c1cn2cc(-c3ccoc3)ccc2n1)N1CCN(c2ccccc2)C(=O)C1	delta_single	Hepatitis C virus,Hepatitis C virus										1.17526										1
InChI=1S/C22H18N6O2/c29-17-10-14(8-9-23-17)21-24-18-19(25-21)22(30)28(20(18)13-4-2-1-3-5-13)16-11-15(26-27-16)12-6-7-12/h1-5,8-12,20H,6-7H2,(H,23,29)(H,24,25)(H,26,27)	4418	1	O=C1c2nc(-c3cc[nH]c(=O)c3)[nH]c2C(c2ccccc2)N1c1cc(C2CC2)n[nH]1	gamma_fused	p53-binding protein Mdm-2,Homo sapiens										1.24174										1
InChI=1S/C22H18N6O2S/c29-21-18(23-19-10-17(24-26-19)12-4-5-12)9-16(25-27-21)13-2-1-3-15(8-13)28-11-14-6-7-31-20(14)22(28)30/h1-3,6-10,12H,4-5,11H2,(H,27,29)(H2,23,24,25,26)	4419	1	O=C1c2sccc2CN1c1cccc(-c2cc(Nc3cc(C4CC4)[nH]n3)c(=O)[nH]n2)c1	gamma_fused	Tyrosine-protein kinase BTK,Homo sapiens										1.07317										1
InChI=1S/C22H18N6O2S2/c29-20-17(25-22-24-15-4-6-23-10-18(15)32-22)9-16(26-27-20)12-2-1-3-14(8-12)28-11-13-5-7-31-19(13)21(28)30/h1-3,5,7-9,23H,4,6,10-11H2,(H,27,29)(H,24,25,26)/p+1	4420	1	O=C1c2sccc2CN1c1cccc(-c2cc(Nc3nc4c(s3)C[NH2+]CC4)c(=O)[nH]n2)c1	gamma_fused	Tyrosine-protein kinase BTK,Homo sapiens										1.07317										1
InChI=1S/C22H19N5O3S/c28-21-18-6-5-17(26-10-9-23-15-26)22(29)27(18)12-11-25(21)13-14-30-19-4-2-1-3-16(19)20-7-8-24-31-20/h1-10,15H,11-14H2	4425	1	O=C1c2ccc(-n3ccnc3)c(=O)n2CCN1CCOc1ccccc1-c1ccns1	delta_fused	Gamma-secretase,Homo sapiens										1.34146										1
InChI=1S/C22H19NO2/c24-22-21-12-11-18(17-7-3-1-4-8-17)15-19(21)16-23(22)13-14-25-20-9-5-2-6-10-20/h1-12,15H,13-14,16H2	4429	1	O=C1c2ccc(-c3ccccc3)cc2CN1CCOc1ccccc1	gamma_fused	Coagulation factor X,Homo sapiens										1.67391										1
InChI=1S/C22H20N2O/c25-21-15-14-19(17-9-3-1-4-10-17)22(18-11-5-2-6-12-18)24(21)20-13-7-8-16-23-20/h1-13,16,19,22H,14-15H2	4431	1	O=C1CCC(c2ccccc2)C(c2ccccc2)N1c1ccccn1	delta_single	Tumour suppressor p53/oncoprotein Mdm2,Homo sapiens										2.48718										1
InChI=1S/C22H20N2O/c25-22-19-13-7-8-14-20(19)23-15-21(18-11-5-2-6-12-18)24(22)16-17-9-3-1-4-10-17/h1-14,21,23H,15-16H2	4432	1	O=C1c2ccccc2NCC(c2ccccc2)N1Cc1ccccc1	epsilon_fused	Tumour suppressor p53/oncoprotein Mdm2,Homo sapiens										2.48718										1
InChI=1S/C22H20N4O2/c27-17-12-11-16(13-23-17)26-20(14-7-3-1-4-8-14)18-19(22(26)28)25-21(24-18)15-9-5-2-6-10-15/h1-10,16,20H,11-13H2,(H,23,27)(H,24,25)	4434	1	O=C1CCC(N2C(=O)c3nc(-c4ccccc4)[nH]c3C2c2ccccc2)CN1	gamma_fused	p53-binding protein Mdm-2,Homo sapiens										1.24174										1
InChI=1S/C22H20N8O2/c31-19-8-7-17(30(19)22(32)14-3-1-9-23-12-14)21-25-20(16-4-2-10-29(16)28-21)24-18-11-15(26-27-18)13-5-6-13/h1-4,9-13,17H,5-8H2,(H2,24,25,26,27,28)/p+1	4438	1	O=C1CCC(c2nn3cccc3c(Nc3cc(C4CC4)[nH]n3)[nH+]2)N1C(=O)c1cccnc1	gamma_single	Insulin-like growth factor I receptor,Homo sapiens										4										1
InChI=1S/C22H21N3O/c26-22-16-23(13-17-7-2-1-3-8-17)15-21-20-11-6-12-24(20)19-10-5-4-9-18(19)14-25(21)22/h1-12,21H,13-16H2/p+1	4439	1	O=C1C[NH+](Cc2ccccc2)CC2c3cccn3-c3ccccc3CN12	delta_fused	Mus musculus,Mus musculus										1.96154										1
InChI=1S/C22H21N3O2/c26-22-20-3-1-2-4-21(20)23-14-19-13-17(15-25(19)22)16-5-7-18(8-6-16)24-9-11-27-12-10-24/h1-8,14-15,19H,9-13H2	4442	1	O=C1c2ccccc2N=CC2CC(c3ccc(N4CCOCC4)cc3)=CN12	epsilon_fused	K562,Homo sapiens										1.55462										1
InChI=1S/C22H21N3O3S/c26-21-17(20-23-18-9-4-5-10-19(18)29(27,28)24-20)13-22(11-6-12-22)15-25(21)14-16-7-2-1-3-8-16/h1-5,7-10,13H,6,11-12,14-15H2,(H,23,24)	4443	1	O=C1C(C2=NS(=O)(=O)c3ccccc3N2)=CC2(CCC2)CN1Cc1ccccc1	delta_spiro	Hepatitis C virus,Hepatitis C virus										1.17526										1
InChI=1S/C22H21N3O3S/c26-22-18(21-23-19-8-4-5-9-20(19)29(27,28)24-21)13-16(14-25(22)17-10-11-17)12-15-6-2-1-3-7-15/h1-9,13,16-17H,10-12,14H2,(H,23,24)	4444	1	O=C1C(C2=NS(=O)(=O)c3ccccc3N2)=CC(Cc2ccccc2)CN1C1CC1	delta_single	Hepatitis C virus,Hepatitis C virus										1.17526										1
InChI=1S/C22H21N3O5S/c26-20-12-29-9-8-24(20)15-6-7-16-19(10-15)31-13-17-18(30-22(28)25(16)17)11-23-21(27)14-4-2-1-3-5-14/h1-7,10,17-18H,8-9,11-13H2,(H,23,27)	4445	1	O=C(NCC1OC(=O)N2c3ccc(N4CCOCC4=O)cc3SCC12)c1ccccc1	delta_single	Coagulation factor X,Homo sapiens										1.67391										1
InChI=1S/C22H21N3O6/c26-17(19(27)23-13-15-7-3-1-4-8-15)14-24-22(30)31-18-11-12-25(21(18)29)20(28)16-9-5-2-6-10-16/h1-10,18H,11-14H2,(H,23,27)(H,24,30)	4446	1	O=C(NCC(=O)C(=O)NCc1ccccc1)OC1CCN(C(=O)c2ccccc2)C1=O	gamma_single	Cathepsin K,Homo sapiens										1.20588										1
InChI=1S/C22H21N3O7/c26-17(19(27)23-13-15-7-3-1-4-8-15)14-24-21(29)32-18-11-12-25(20(18)28)22(30)31-16-9-5-2-6-10-16/h1-10,18H,11-14H2,(H,23,27)(H,24,29)	4447	1	O=C(NCC(=O)C(=O)NCc1ccccc1)OC1CCN(C(=O)Oc2ccccc2)C1=O	gamma_single	Cathepsin K,Homo sapiens										1.20588										1
InChI=1S/C22H21N5O4/c28-21-18-13-23-14-24-20(18)30-12-10-27(21)17-3-1-15(2-4-17)16-5-8-26(9-6-16)22(29)19-7-11-31-25-19/h1-4,7,11,13-14,16H,5-6,8-10,12H2	4448	1	O=C(c1ccon1)N1CCC(c2ccc(N3CCOc4ncncc4C3=O)cc2)CC1	epsilon_fused	Diacylglycerol O-acyltransferase 1,Homo sapiens										1.17808										1
InChI=1S/C22H21N5O4/c28-21-18-13-23-14-24-20(18)30-12-11-27(21)17-3-1-15(2-4-17)16-6-9-26(10-7-16)22(29)19-5-8-25-31-19/h1-5,8,13-14,16H,6-7,9-12H2	4449	1	O=C(c1ccno1)N1CCC(c2ccc(N3CCOc4ncncc4C3=O)cc2)CC1	epsilon_fused	Diacylglycerol O-acyltransferase 1,Homo sapiens										1.17808										1
InChI=1S/C22H21N5O4S/c28-21-19-12-18(32(30,31)25-10-4-5-11-25)8-9-20(19)26(22(21)29)15-17-13-23-24-27(17)14-16-6-2-1-3-7-16/h1-3,6-9,12-13H,4-5,10-11,14-15H2	4450	1	O=C1C(=O)N(Cc2cnnn2Cc2ccccc2)c2ccc(S(=O)(=O)N3CCCC3)cc21	gamma_fused	Caspase-3,Homo sapiens										1.3046										1
InChI=1S/C22H21N5O4S/c28-21-19-12-18(32(30,31)26-10-4-5-11-26)8-9-20(19)27(22(21)29)15-17-14-25(24-23-17)13-16-6-2-1-3-7-16/h1-3,6-9,12,14H,4-5,10-11,13,15H2	4451	1	O=C1C(=O)N(Cc2cn(Cc3ccccc3)nn2)c2ccc(S(=O)(=O)N3CCCC3)cc21	gamma_fused	Caspase-3,Homo sapiens										1.3046										1
InChI=1S/C22H21N5O4S/c28-21-19-14-18(32(30,31)25-11-4-5-12-25)8-9-20(19)26(22(21)29)13-10-16-15-27(24-23-16)17-6-2-1-3-7-17/h1-3,6-9,14-15H,4-5,10-13H2	4452	1	O=C1C(=O)N(CCc2cn(-c3ccccc3)nn2)c2ccc(S(=O)(=O)N3CCCC3)cc21	gamma_fused	Caspase-3,Homo sapiens										1.3046										1
InChI=1S/C22H21N5O4S/c28-21-19-14-18(32(30,31)25-11-4-5-12-25)8-9-20(19)26(22(21)29)13-10-17-15-23-24-27(17)16-6-2-1-3-7-16/h1-3,6-9,14-15H,4-5,10-13H2	4453	1	O=C1C(=O)N(CCc2cnnn2-c2ccccc2)c2ccc(S(=O)(=O)N3CCCC3)cc21	gamma_fused	Caspase-3,Homo sapiens										1.3046										1
InChI=1S/C22H22N2O/c25-22-19(10-6-14-24(22)16-17-7-2-1-3-8-17)15-20-13-12-18-9-4-5-11-21(18)23-20/h1-5,7-9,11-13,19H,6,10,14-16H2	4457	1	O=C1C(Cc2ccc3ccccc3n2)CCCN1Cc1ccccc1	delta_single	Echinochloa esculenta,Echinochloa esculenta										2.82353										1
InChI=1S/C22H22N2O/c25-22-19(9-6-14-24(22)16-17-7-2-1-3-8-17)15-18-12-13-23-21-11-5-4-10-20(18)21/h1-5,7-8,10-13,19H,6,9,14-16H2	4458	1	O=C1C(Cc2ccnc3ccccc23)CCCN1Cc1ccccc1	delta_single	Echinochloa esculenta,Echinochloa esculenta										2.82353										1
InChI=1S/C22H22N4O/c27-22-20-3-1-2-4-21(20)24-14-19-13-17(15-26(19)22)16-5-7-18(8-6-16)25-11-9-23-10-12-25/h1-8,14-15,19,23H,9-13H2/p+1	4465	1	O=C1c2ccccc2N=CC2CC(c3ccc(N4CC[NH2+]CC4)cc3)=CN12	epsilon_fused	K562,Homo sapiens										1.55462										1
InChI=1S/C22H22N4O2/c27-21(23-14-17-5-2-1-3-6-17)13-18-15-24-26(16-18)20-10-8-19(9-11-20)25-12-4-7-22(25)28/h1-3,5-6,8-11,15-16H,4,7,12-14H2,(H,23,27)	4467	1	O=C(Cc1cnn(-c2ccc(N3CCCC3=O)cc2)c1)NCc1ccccc1	gamma_single	P2X purinoceptor 7,Homo sapiens										1.08088										1
InChI=1S/C22H22N4O3S2/c27-20-15-26(31(28,29)21-13-18-3-1-2-4-19(18)30-21)12-11-25(20)14-16-5-7-17(8-6-16)22-23-9-10-24-22/h1-8,13H,9-12,14-15H2,(H,23,24)	4468	1	O=C1CN(S(=O)(=O)c2cc3ccccc3s2)CCN1Cc1ccc(C2=NCCN2)cc1	delta_single	Coagulation factor X,Homo sapiens										1.67391										1
InChI=1S/C22H22N4O6/c27-20-13-30-9-8-25(20)15-6-7-16-18(10-15)31-12-17-19(32-22(29)26(16)17)11-23-21(28)24-14-4-2-1-3-5-14/h1-7,10,17,19H,8-9,11-13H2,(H2,23,24,28)	4469	1	O=C(NCC1OC(=O)N2c3ccc(N4CCOCC4=O)cc3OCC12)Nc1ccccc1	delta_single	Coagulation factor X,Homo sapiens										1.67391										1
InChI=1S/C22H23N3O/c26-22-20-7-2-1-5-16(20)15-25(22)18-9-11-24(12-10-18)14-17-13-23-21-8-4-3-6-19(17)21/h1-8,13,18,23H,9-12,14-15H2/p+1	4471	1	O=C1c2ccccc2CN1C1CC[NH+](Cc2c[nH]c3ccccc23)CC1	gamma_fused	Poly [ADP-ribose] polymerase-1,Mus musculus										1.56522										1
InChI=1S/C22H23N3O3/c26-18-12-6-11-17-20(18)19(22(28)24(17)14-7-4-5-8-14)16-13-23-25(21(16)27)15-9-2-1-3-10-15/h1-3,9-10,13-14,19,23H,4-8,11-12H2	4473	1	O=C1CCCC2=C1C(c1c[nH]n(-c3ccccc3)c1=O)C(=O)N2C1CCCC1	gamma_fused	Elongation of very long chain fatty acids protein 6,Homo sapiens										1.36										1
InChI=1S/C22H23N3O4S/c26-20-5-1-2-10-24(20)15-7-9-16-14(12-15)6-8-17-18(29-22(28)25(16)17)13-23-21(27)19-4-3-11-30-19/h3-4,7,9,11-12,17-18H,1-2,5-6,8,10,13H2,(H,23,27)	4478	1	O=C(NCC1OC(=O)N2c3ccc(N4CCCCC4=O)cc3CCC12)c1cccs1	delta_single	Coagulation factor X,Homo sapiens										1.67391										1
InChI=1S/C22H23N3O5/c26-18(20(27)23-13-16-7-3-1-4-8-16)14-24-22(29)30-19-11-12-25(21(19)28)15-17-9-5-2-6-10-17/h1-10,19H,11-15H2,(H,23,27)(H,24,29)	4479	1	O=C(NCC(=O)C(=O)NCc1ccccc1)OC1CCN(Cc2ccccc2)C1=O	gamma_single	Cathepsin K,Homo sapiens										1.20588										1
InChI=1S/C22H23N5O2/c28-22-21-20(23-27(24-21)18-6-2-1-3-7-18)16-26(22)17-8-10-19(11-9-17)29-15-14-25-12-4-5-13-25/h1-3,6-11H,4-5,12-16H2/p+1	4481	1	O=C1c2nn(-c3ccccc3)nc2CN1c1ccc(OCC[NH+]2CCCC2)cc1	gamma_fused	HERG,Homo sapiens										7.80952										1
InChI=1S/C22H23N5O2S/c28-22-19-12-23-13-24-21(19)29-10-9-27(22)18-7-5-17(6-8-18)16-3-1-15(2-4-16)11-20-26-25-14-30-20/h5-8,12-16H,1-4,9-11H2	4482	1	O=C1c2cncnc2OCCN1c1ccc(C2CCC(Cc3nncs3)CC2)cc1	epsilon_fused	Diacylglycerol O-acyltransferase 1,Homo sapiens										1.17808										1
InChI=1S/C22H23N5O3/c28-22-19-12-23-13-24-21(19)29-10-9-27(22)18-7-5-17(6-8-18)16-3-1-15(2-4-16)11-20-26-25-14-30-20/h5-8,12-16H,1-4,9-11H2	4483	1	O=C1c2cncnc2OCCN1c1ccc(C2CCC(Cc3nnco3)CC2)cc1	epsilon_fused	Diacylglycerol O-acyltransferase 1,Homo sapiens										1.17808										1
InChI=1S/C22H23N5O3S/c28-21-15-27(31(29,30)20-13-18-3-1-2-4-19(18)25-20)12-11-26(21)14-16-5-7-17(8-6-16)22-23-9-10-24-22/h1-8,13,25H,9-12,14-15H2,(H,23,24)	4484	1	O=C1CN(S(=O)(=O)c2cc3ccccc3[nH]2)CCN1Cc1ccc(C2=NCCN2)cc1	delta_single	Coagulation factor X,Homo sapiens										1.67391										1
InChI=1S/C22H23NO3/c24-22-19(15-18-8-9-20-21(16-18)26-14-13-25-20)10-12-23(22)11-4-7-17-5-2-1-3-6-17/h1-9,16,19H,10-15H2/b7-4+	4487	1	O=C1C(Cc2ccc3c(c2)OCCO3)CCN1C/C=C/c1ccccc1	gamma_single	Echinochloa esculenta,Echinochloa esculenta										2.82353										1
InChI=1S/C22H23NO3/c24-22-19(15-18-8-9-20-21(16-18)26-14-13-25-20)7-4-11-23(22)12-10-17-5-2-1-3-6-17/h1-3,5-6,8-10,12,16,19H,4,7,11,13-15H2/b12-10+	4488	1	O=C1C(Cc2ccc3c(c2)OCCO3)CCCN1/C=C/c1ccccc1	delta_single	Echinochloa esculenta,Echinochloa esculenta										2.82353										1
InChI=1S/C22H23NO3/c24-22-21(16-10-11-19-20(12-16)26-14-25-19)17-8-4-5-9-18(17)23(22)13-15-6-2-1-3-7-15/h4-5,8-12,15,21H,1-3,6-7,13-14H2	4489	1	O=C1C(c2ccc3c(c2)OCO3)c2ccccc2N1CC1CCCCC1	gamma_fused	Sodium channel protein type IX alpha subunit,Homo sapiens										1.66234										1
InChI=1S/C22H24N2O2/c25-21-14-18(15-24(21)20-11-4-5-12-20)22(26)23-19-10-6-9-17(13-19)16-7-2-1-3-8-16/h1-3,6-10,13,18,20H,4-5,11-12,14-15H2,(H,23,26)	4491	1	O=C(Nc1cccc(-c2ccccc2)c1)C1CC(=O)N(C2CCCC2)C1	gamma_single	Enoyl-[acyl-carrier-protein] reductase,Mycobacterium tuberculosis										2.65789										1
InChI=1S/C22H24N6O/c29-21-16-23-14-15-28(21)18-9-10-20(27-22(18)17-6-2-1-3-7-17)26-13-12-25-19-8-4-5-11-24-19/h1-11,23H,12-16H2,(H,24,25)(H,26,27)/p+1	4497	1	O=C1C[NH2+]CCN1c1ccc(NCCNc2ccccn2)nc1-c1ccccc1	delta_single	Glycogen synthase kinase-3,Homo sapiens										2										1
InChI=1S/C22H25N3O/c26-22-17-8-4-10-19(24-14-12-23-13-15-24)21(17)20-11-5-9-18(25(20)22)16-6-2-1-3-7-16/h1-4,6-8,10,18,20,23H,5,9,11-15H2/p+1	4498	1	O=C1c2cccc(N3CC[NH2+]CC3)c2C2CCCC(c3ccccc3)N12	gamma_fused	Urotensin II receptor,Rattus norvegicus										1.29167										1
InChI=1S/C22H25N3O2/c26-21-22(27)25(16-15-24(21)17-18-9-3-1-4-10-18)20-12-6-5-11-19(20)23-13-7-2-8-14-23/h1,3-6,9-12H,2,7-8,13-17H2	4500	1	O=C1C(=O)N(c2ccccc2N2CCCCC2)CCN1Cc1ccccc1	delta_single	P2X purinoceptor 7,Homo sapiens										1.08088										1
InChI=1S/C22H25N3O3/c26-20-13-19-22(28)25(17-9-5-2-6-10-17)12-11-24(19)15-18(20)21(27)23-14-16-7-3-1-4-8-16/h1,3-4,7-8,13,15,17H,2,5-6,9-12,14H2,(H,23,27)	4501	1	O=C(NCc1ccccc1)c1cn2c(cc1=O)C(=O)N(C1CCCCC1)CC2	delta_fused	Human immunodeficiency virus 1,Human immunodeficiency virus 1										1.54167										1
InChI=1S/C22H25N3O3/c26-21-22(27)25(10-9-24(21)17-18-5-2-1-3-6-18)20-8-4-7-19(15-20)16-23-11-13-28-14-12-23/h1-8,15H,9-14,16-17H2/p+1	4502	1	O=C1C(=O)N(c2cccc(C[NH+]3CCOCC3)c2)CCN1Cc1ccccc1	delta_single	P2X purinoceptor 7,Homo sapiens										1.08088										1
InChI=1S/C22H25NO/c24-21-20(18-10-4-1-5-11-18)14-17-23(21)22(15-8-3-9-16-22)19-12-6-2-7-13-19/h1-2,4-7,10-13,20H,3,8-9,14-17H2	4511	1	O=C1C(c2ccccc2)CCN1C1(c2ccccc2)CCCCC1	gamma_single	Neurokinin 1 receptor,Homo sapiens										1.14667										1
InChI=1S/C22H25NO2/c24-22-14-19(16-23(22)15-17-7-2-1-3-8-17)18-9-6-12-21(13-18)25-20-10-4-5-11-20/h1-3,6-9,12-13,19-20H,4-5,10-11,14-16H2	4514	1	O=C1CC(c2cccc(OC3CCCC3)c2)CN1Cc1ccccc1	gamma_single	Phosphodiesterase 4,Homo sapiens										1.77273										1
InChI=1S/C22H26N2O2/c25-22-20(23-12-6-9-17-7-2-1-3-8-17)15-18-10-4-5-11-19(18)21-16-26-14-13-24(21)22/h1-5,7-8,10-11,20-21,23H,6,9,12-16H2/p+1	4516	1	O=C1C([NH2+]CCCc2ccccc2)Cc2ccccc2C2COCCN12	epsilon_fused	Angiotensin-converting enzyme,Oryctolagus cuniculus										2.2381										1
InChI=1S/C22H26N2O3/c25-21(23-13-5-10-18-11-6-14-27-18)19-12-4-7-16-15-24(22(26)20(16)19)17-8-2-1-3-9-17/h4,6-7,11-12,14,17H,1-3,5,8-10,13,15H2,(H,23,25)	4518	1	O=C(NCCCc1ccco1)c1cccc2c1C(=O)N(C1CCCCC1)C2	gamma_fused	Corticotropin-releasing factor receptor 2/Corticotropin-releasing factor-binding protein,Homo sapiens										16										1
InChI=1S/C22H26N2O4S/c25-21(23-13-9-19(10-14-23)24-12-3-6-22(24)26)11-15-29(27,28)20-8-7-17-4-1-2-5-18(17)16-20/h1-2,4-5,7-8,16,19H,3,6,9-15H2	4519	1	O=C(CCS(=O)(=O)c1ccc2ccccc2c1)N1CCC(N2CCCC2=O)CC1	gamma_single	Coagulation factor X,Homo sapiens										1.67391										1
InChI=1S/C22H26N2O5S/c25-21(23-10-7-19(8-11-23)24-12-13-29-16-22(24)26)9-14-30(27,28)20-6-5-17-3-1-2-4-18(17)15-20/h1-6,15,19H,7-14,16H2	4520	1	O=C(CCS(=O)(=O)c1ccc2ccccc2c1)N1CCC(N2CCOCC2=O)CC1	delta_single	Coagulation factor X,Homo sapiens										1.67391										1
InChI=1S/C22H26N4O2/c27-20-9-4-5-12-25(20)13-6-10-21(28)26-14-11-18-15-23-22(24-19(18)16-26)17-7-2-1-3-8-17/h1-3,7-8,15H,4-6,9-14,16H2	4522	1	O=C1CCCCN1CCCC(=O)N1CCc2cnc(-c3ccccc3)nc2C1	delta_single	Dipeptidyl peptidase IV,Homo sapiens										1.16667										1
InChI=1S/C22H26N4O2/c27-22-19-8-1-2-9-20(19)28-16-15-26(22)14-4-3-12-25-13-5-7-18(17-25)21-23-10-6-11-24-21/h1-2,6,8-11,15-16,18H,3-5,7,12-14,17H2/p+1	4523	1	O=C1c2ccccc2OC=CN1CCCC[NH+]1CCCC(c2ncccn2)C1	epsilon_fused	Serotonin 1a (5-HT1a) receptor,Rattus norvegicus										1.1										1
InChI=1S/C22H26N4O4/c27-20-14-19-22(29)25(7-6-24-10-12-30-13-11-24)8-9-26(19)16-18(20)21(28)23-15-17-4-2-1-3-5-17/h1-5,14,16H,6-13,15H2,(H,23,28)/p+1	4525	1	O=C(NCc1ccccc1)c1cn2c(cc1=O)C(=O)N(CC[NH+]1CCOCC1)CC2	delta_fused	Human immunodeficiency virus 1,Human immunodeficiency virus 1										1.54167										1
InChI=1S/C22H26N6O/c29-22-19(26-16-6-2-1-3-7-16)9-5-13-28(22)17-8-4-12-27(14-17)21-18-10-11-23-20(18)24-15-25-21/h1-3,6-7,10-11,15,17,19,26H,4-5,8-9,12-14H2,(H,23,24,25)	4526	1	O=C1C(Nc2ccccc2)CCCN1C1CCCN(c2ncnc3[nH]ccc23)C1	delta_single	Tyrosine-protein kinase BTK,Homo sapiens										1.07317										1
InChI=1S/C22H27N3O3S/c26-22-17(21-23-18-11-5-7-13-20(18)29(27,28)24-21)14-15-8-4-6-12-19(15)25(22)16-9-2-1-3-10-16/h5,7,11,13-16,19H,1-4,6,8-10,12H2,(H,23,24)	4529	1	O=C1C(C2=NS(=O)(=O)c3ccccc3N2)=CC2CCCCC2N1C1CCCCC1	delta_fused	Hepatitis C virus,Hepatitis C virus										1.17526										1
InChI=1S/C22H27N3O3S/c26-22-18(21-23-19-7-3-4-8-20(19)29(27,28)24-21)13-16(12-11-15-9-10-15)14-25(22)17-5-1-2-6-17/h3-4,7-8,13,15-17H,1-2,5-6,9-12,14H2,(H,23,24)	4530	1	O=C1C(C2=NS(=O)(=O)c3ccccc3N2)=CC(CCC2CC2)CN1C1CCCC1	delta_single	Hepatitis C virus,Hepatitis C virus										1.17526										1
InChI=1S/C22H28N4O/c27-22-11-4-5-12-26(22)18-20-8-6-7-19(23-20)17-24-13-15-25(16-14-24)21-9-2-1-3-10-21/h1-3,6-10H,4-5,11-18H2/p+1	4534	1	O=C1CCCCN1Cc1cccc(C[NH+]2CCN(c3ccccc3)CC2)n1	delta_single	Rattus norvegicus,Rattus norvegicus										2.39726										1
InChI=1S/C22H28N4O4S2/c27-21(24-10-11-25-32(29,30)20-2-1-13-31-20)17-3-4-18-15-26(22(28)19(18)14-17)12-7-16-5-8-23-9-6-16/h1-4,13-14,16,23,25H,5-12,15H2,(H,24,27)/p+1	4535	1	O=C(NCCNS(=O)(=O)c1cccs1)c1ccc2c(c1)C(=O)N(CCC1CC[NH2+]CC1)C2	gamma_fused	Homo sapiens,Homo sapiens										1.31944										1
InChI=1S/C22H28N6O3/c29-20-2-1-13-28(20)14-15-31-19-9-12-24-22(27-19)26-17-5-3-16(4-6-17)21(30)25-18-7-10-23-11-8-18/h3-6,9,12,18,23H,1-2,7-8,10-11,13-15H2,(H,25,30)(H,24,26,27)/p+1	4537	1	O=C(NC1CC[NH2+]CC1)c1ccc(Nc2nccc(OCCN3CCCC3=O)n2)cc1	gamma_single	Focal adhesion kinase 1,Homo sapiens										11										1
InChI=1S/C22H29N5O4S2/c28-21(25-10-11-26-33(30,31)17-2-1-7-24-15-17)20-14-18-19(32-20)6-13-27(22(18)29)12-5-16-3-8-23-9-4-16/h1-2,7,14-16,23,26H,3-6,8-13H2,(H,25,28)/p+1	4540	1	O=C(NCCNS(=O)(=O)c1cccnc1)c1cc2c(s1)CCN(CCC1CC[NH2+]CC1)C2=O	delta_fused	Homo sapiens,Homo sapiens										1.31944										1
InChI=1S/C22H34N4O4S/c27-21(24-14-15-25-31(29,30)20-6-2-1-3-7-20)17-26-16-4-5-19(22(26)28)9-8-18-10-12-23-13-11-18/h1-3,6-7,18-19,23,25H,4-5,8-17H2,(H,24,27)/p+1	4549	1	O=C(CN1CCCC(CCC2CC[NH2+]CC2)C1=O)NCCNS(=O)(=O)c1ccccc1	delta_single	Integrin alpha-IIb/beta-3,Homo sapiens										1.70213										1
InChI=1S/C23H16N4O3/c28-22-17-13-26(12-15-7-3-6-14-5-1-2-8-16(14)15)23(29)21(17)24-20-11-18(25-27(20)22)19-9-4-10-30-19/h1-11,24H,12-13H2	4553	1	O=C1c2[nH]c3cc(-c4ccco4)nn3c(=O)c2CN1Cc1cccc2ccccc12	gamma_fused	Serine/threonine-protein kinase Aurora-A,Homo sapiens										2.35714										1
InChI=1S/C23H16N4O4/c28-20-18-5-2-1-4-16(18)13-27(20)14-23(21(29)25-22(30)26-23)8-7-15-10-17(12-24-11-15)19-6-3-9-31-19/h1-6,9-12H,13-14H2,(H2,25,26,29,30)	4554	1	O=C1NC(=O)C(C#Cc2cncc(-c3ccco3)c2)(CN2Cc3ccccc3C2=O)N1	gamma_fused	TNF-alpha,Homo sapiens										1.40099										1
InChI=1S/C23H17N5O4S/c29-19-16-4-2-1-3-15(16)11-28(19)12-23(20(30)26-22(32)27-23)10-9-13-5-7-14(8-6-13)17-18(33)25-21(31)24-17/h1-8,17H,11-12H2,(H2,24,25,31,33)(H2,26,27,30,32)	4558	1	O=C1NC(=S)C(c2ccc(C#CC3(CN4Cc5ccccc5C4=O)NC(=O)NC3=O)cc2)N1	gamma_fused	TNF-alpha,Homo sapiens										1.40099										1
InChI=1S/C23H17NO5/c25-23-22(15-6-8-19-21(10-15)29-13-27-19)16-3-1-2-4-17(16)24(23)11-14-5-7-18-20(9-14)28-12-26-18/h1-10,22H,11-13H2	4561	1	O=C1C(c2ccc3c(c2)OCO3)c2ccccc2N1Cc1ccc2c(c1)OCO2	gamma_fused	Sodium channel protein type IX alpha subunit,Homo sapiens										1.66234										1
InChI=1S/C23H17NOS/c25-23-21(20-11-6-14-26-20)22(24(23)19-9-2-1-3-10-19)18-13-12-16-7-4-5-8-17(16)15-18/h1-15,21-22H	4563	1	O=C1C(c2cccs2)C(c2ccc3ccccc3c2)N1c1ccccc1	beta_single	MCF7,Homo sapiens										4.16514										1
InChI=1S/C23H17NOS/c25-23-21(20-14-7-15-26-20)22(24(23)17-10-2-1-3-11-17)19-13-6-9-16-8-4-5-12-18(16)19/h1-15,21-22H	4564	1	O=C1C(c2cccs2)C(c2cccc3ccccc23)N1c1ccccc1	beta_single	MCF7,Homo sapiens										4.16514										1
InChI=1S/C23H17NOS/c25-23-21(20-15-17-11-7-8-14-19(17)26-20)22(16-9-3-1-4-10-16)24(23)18-12-5-2-6-13-18/h1-15,21-22H	4565	1	O=C1C(c2cc3ccccc3s2)C(c2ccccc2)N1c1ccccc1	beta_single	MCF7,Homo sapiens										4.16514										1
InChI=1S/C23H18N4O2/c28-20-12-11-18(13-24-20)27-22(17-9-5-2-6-10-17)19-15-26(25-21(19)23(27)29)14-16-7-3-1-4-8-16/h1-13,15,22H,14H2,(H,24,28)	4573	1	O=C1c2nn(Cc3ccccc3)cc2C(c2ccccc2)N1c1ccc(=O)[nH]c1	gamma_fused	Bromodomain-containing protein 4,Homo sapiens										1.05263										1
InChI=1S/C23H19N3O2/c27-22-7-4-12-26(22)17-9-11-19-21(14-17)25-23(28)18-10-8-16(13-20(18)24-19)15-5-2-1-3-6-15/h1-3,5-6,8-11,13-14,24H,4,7,12H2,(H,25,28)	4578	1	O=C1Nc2cc(N3CCCC3=O)ccc2Nc2cc(-c3ccccc3)ccc21	gamma_single	Serine/threonine-protein kinase Chk1,Homo sapiens										2										1
InChI=1S/C23H19N5O2/c29-21-13-16-27(18-10-8-17(9-11-18)26-15-4-7-22(26)30)25-23(21)20-12-14-24-28(20)19-5-2-1-3-6-19/h1-3,5-6,8-14,16H,4,7,15H2	4582	1	O=C1CCCN1c1ccc(-n2ccc(=O)c(-c3ccnn3-c3ccccc3)n2)cc1	gamma_single	Phosphodiesterase 10A,Homo sapiens										1.16667										1
InChI=1S/C23H19N7O2/c31-21-16(8-4-9-24-21)30-19(14-6-2-1-3-7-14)17-18(22(30)32)28-20(27-17)15-12-25-23(26-13-15)29-10-5-11-29/h1-4,6-9,12-13,19H,5,10-11H2,(H,24,31)(H,27,28)	4584	1	O=C1c2nc(-c3cnc(N4CCC4)nc3)[nH]c2C(c2ccccc2)N1c1ccc[nH]c1=O	gamma_fused	p53-binding protein Mdm-2,Homo sapiens										1.24174										1
InChI=1S/C23H19NO2/c25-22-13-17(15-24(22)14-16-7-2-1-3-8-16)18-10-6-12-21-23(18)19-9-4-5-11-20(19)26-21/h1-12,17H,13-15H2	4586	1	O=C1CC(c2cccc3oc4ccccc4c23)CN1Cc1ccccc1	gamma_single	Phosphodiesterase 10A,Homo sapiens										1.16667										1
InChI=1S/C23H19NO3/c25-23-22(17-10-11-20-21(14-17)27-13-12-26-20)18-8-4-5-9-19(18)24(23)15-16-6-2-1-3-7-16/h1-11,14,22H,12-13,15H2	4589	1	O=C1C(c2ccc3c(c2)OCCO3)c2ccccc2N1Cc1ccccc1	gamma_fused	Sodium channel protein type IX alpha subunit,Homo sapiens										1.66234										1
InChI=1S/C23H20N2O2/c26-22(24-15-17-8-2-1-3-9-17)16-25-21-13-7-5-11-19(21)14-18-10-4-6-12-20(18)23(25)27/h1-13H,14-16H2,(H,24,26)	4593	1	O=C(CN1C(=O)c2ccccc2Cc2ccccc21)NCc1ccccc1	epsilon_fused	Integrin alpha-V/beta-3,Homo sapiens										1.53846										1
InChI=1S/C23H20N2O2/c26-22-23(27)25(16-15-24(22)17-18-9-3-1-4-10-18)21-14-8-7-13-20(21)19-11-5-2-6-12-19/h1-14H,15-17H2	4596	1	O=C1C(=O)N(c2ccccc2-c2ccccc2)CCN1Cc1ccccc1	delta_single	P2X purinoceptor 7,Homo sapiens										1.08088										1
InChI=1S/C23H20N4O3/c28-22-20-9-8-19(26-11-10-24-16-26)23(29)27(20)13-12-25(22)14-15-30-21-7-3-5-17-4-1-2-6-18(17)21/h1-11,16H,12-15H2	4600	1	O=C1c2ccc(-n3ccnc3)c(=O)n2CCN1CCOc1cccc2ccccc12	delta_fused	Gamma-secretase,Homo sapiens										1.34146										1
InChI=1S/C23H20N6O2S/c30-22-21(27-14-10-25-26-11-14)28-18(12-24-22)13-3-1-4-15(9-13)29-8-7-17-16-5-2-6-19(16)32-20(17)23(29)31/h1,3-4,9-12H,2,5-8H2,(H,24,30)(H,25,26)(H,27,28)	4602	1	O=C1c2sc3c(c2CCN1c1cccc(-c2c[nH]c(=O)c(Nc4cn[nH]c4)n2)c1)CCC3	delta_fused	Tyrosine-protein kinase BTK,Homo sapiens										1.07317										1
InChI=1S/C23H21N3O2S/c27-21(24-13-12-18-9-6-14-29-18)16-26-20-11-5-4-10-19(20)23(25-15-22(26)28)17-7-2-1-3-8-17/h1-11,14H,12-13,15-16H2,(H,24,27)	4606	1	O=C(CN1C(=O)CN=C(c2ccccc2)c2ccccc21)NCCc1cccs1	epsilon_fused	Oxytocin receptor,Homo sapiens										2.66667										1
InChI=1S/C23H21N3O3S/c27-21-9-3-4-14-26(21)17-12-10-16(11-13-17)24-22(28)18-6-1-2-7-19(18)25-23(29)20-8-5-15-30-20/h1-2,5-8,10-13,15H,3-4,9,14H2,(H,24,28)(H,25,29)	4610	1	O=C(Nc1ccccc1C(=O)Nc1ccc(N2CCCCC2=O)cc1)c1cccs1	delta_single	Coagulation factor X,Homo sapiens										1.67391										1
InChI=1S/C23H21N3O4S/c27-21-15-30-12-11-26(21)18-9-7-17(8-10-18)25-22(28)19-5-2-1-4-16(19)14-24-23(29)20-6-3-13-31-20/h1-10,13H,11-12,14-15H2,(H,24,29)(H,25,28)	4613	1	O=C(NCc1ccccc1C(=O)Nc1ccc(N2CCOCC2=O)cc1)c1cccs1	delta_single	Coagulation factor X,Homo sapiens										1.67391										1
InChI=1S/C23H21N5O4/c29-20-18-6-2-1-4-17(18)14-28(20)15-23(21(30)25-22(31)26-23)8-7-16-5-3-9-24-19(16)27-10-12-32-13-11-27/h1-6,9H,10-15H2,(H2,25,26,30,31)	4618	1	O=C1NC(=O)C(C#Cc2cccnc2N2CCOCC2)(CN2Cc3ccccc3C2=O)N1	gamma_fused	TNF-alpha,Homo sapiens										1.40099										1
InChI=1S/C23H21N5O6S/c29-22-18-12-17(35(31,32)26-7-1-2-8-26)4-5-19(18)27(23(22)30)13-15-14-28(25-24-15)16-3-6-20-21(11-16)34-10-9-33-20/h3-6,11-12,14H,1-2,7-10,13H2	4619	1	O=C1C(=O)N(Cc2cn(-c3ccc4c(c3)OCCO4)nn2)c2ccc(S(=O)(=O)N3CCCC3)cc21	gamma_fused	Caspase-3,Homo sapiens										1.3046										1
InChI=1S/C23H21N5O6S/c29-22-18-12-17(35(31,32)26-7-1-2-8-26)4-5-19(18)27(23(22)30)14-16-13-24-25-28(16)15-3-6-20-21(11-15)34-10-9-33-20/h3-6,11-13H,1-2,7-10,14H2	4620	1	O=C1C(=O)N(Cc2cnnn2-c2ccc3c(c2)OCCO3)c2ccc(S(=O)(=O)N3CCCC3)cc21	gamma_fused	Caspase-3,Homo sapiens										1.3046										1
InChI=1S/C23H21N7O2S/c31-22-19(24-20-10-16(25-27-20)13-29-6-2-7-29)11-18(26-28-22)14-3-1-4-17(9-14)30-12-15-5-8-33-21(15)23(30)32/h1,3-5,8-11H,2,6-7,12-13H2,(H,28,31)(H2,24,25,26,27)/p+1	4621	1	O=C1c2sccc2CN1c1cccc(-c2cc(Nc3cc(C[NH+]4CCC4)[nH]n3)c(=O)[nH]n2)c1	gamma_fused	Tyrosine-protein kinase BTK,Homo sapiens										1.07317										1
InChI=1S/C23H21N9O/c33-21-4-2-8-30(21)9-10-31-15-18(12-26-31)20-13-25-22-23(27-20)32(29-28-22)14-16-5-6-19-17(11-16)3-1-7-24-19/h1,3,5-7,11-13,15H,2,4,8-10,14H2	4622	1	O=C1CCCN1CCn1cc(-c2cnc3nnn(Cc4ccc5ncccc5c4)c3n2)cn1	gamma_single	Hepatocyte growth factor receptor,Homo sapiens										1.95833										1
InChI=1S/C23H21NO/c25-22-17-16-21(18-10-4-1-5-11-18)23(19-12-6-2-7-13-19)24(22)20-14-8-3-9-15-20/h1-15,21,23H,16-17H2	4623	1	O=C1CCC(c2ccccc2)C(c2ccccc2)N1c1ccccc1	delta_single	Tumour suppressor p53/oncoprotein Mdm2,Homo sapiens										2.48718										1
InChI=1S/C23H21NO/c25-23-21(16-18-10-4-1-5-11-18)22(20-14-8-3-9-15-20)24(23)17-19-12-6-2-7-13-19/h1-15,21-22H,16-17H2	4624	1	O=C1C(Cc2ccccc2)C(c2ccccc2)N1Cc1ccccc1	beta_single	Acyl-CoA:cholesterol acyltransferase,Oryctolagus cuniculus										1.33333										1
InChI=1S/C23H22N2O/c26-22-23(13-6-9-18-12-14-24-15-20(18)23)19-10-4-5-11-21(19)25(22)16-17-7-2-1-3-8-17/h1-8,10-13,20,24H,9,14-16H2	4625	1	O=C1N(Cc2ccccc2)c2ccccc2C12C=CCC1=CCNCC12	gamma_fused	Cannabinoid CB1 receptor,Homo sapiens										1.3										1
InChI=1S/C23H22N2O/c26-23-21(15-7-9-18-10-8-16-24-17-18)22(19-11-3-1-4-12-19)25(23)20-13-5-2-6-14-20/h1-6,8,10-14,16-17,21-22H,7,9,15H2	4628	1	O=C1C(CCCc2cccnc2)C(c2ccccc2)N1c1ccccc1	beta_single	Cannabinoid CB1 receptor,Homo sapiens										1.3										1
InChI=1S/C23H22N2O3/c26-20-11-6-13-24(20)19-12-14-28-22-17-9-4-5-10-18(17)25(23(27)21(19)22)15-16-7-2-1-3-8-16/h1-5,7-10,19H,6,11-15H2	4631	1	O=C1CCCN1C1CCOc2c1c(=O)n(Cc1ccccc1)c1ccccc21	gamma_single	Rattus norvegicus,Rattus norvegicus										2.39726										1
InChI=1S/C23H22N4O2/c28-22(26-11-9-24-10-12-26)17-7-5-16(6-8-17)18-13-19-14-25-21-4-2-1-3-20(21)23(29)27(19)15-18/h1-8,14-15,19,24H,9-13H2/p+1	4636	1	O=C(c1ccc(C2=CN3C(=O)c4ccccc4N=CC3C2)cc1)N1CC[NH2+]CC1	epsilon_fused	K562,Homo sapiens										1.55462										1
InChI=1S/C23H22N4O4S/c28-20-19-4-2-1-3-16(19)13-27(20)15-23(21(29)24-22(30)25-23)8-7-17-5-6-18(32-17)14-26-9-11-31-12-10-26/h1-6H,9-15H2,(H2,24,25,29,30)/p+1	4639	1	O=C1NC(=O)C(C#Cc2ccc(C[NH+]3CCOCC3)s2)(CN2Cc3ccccc3C2=O)N1	gamma_fused	TNF-alpha,Homo sapiens										1.40099										1
InChI=1S/C23H22N4O4S/c28-22-23(7-8-23)17-9-16-19(31-25-21(16)26-32(29)15-4-5-15)10-18(17)27(22)14-3-6-20(24-11-14)30-12-13-1-2-13/h3,6,9-11,13,15,32H,1-2,4-5,7-8,12H2	4640	1	O=C1N(c2ccc(OCC3CC3)nc2)c2cc3onc(N=[SH](=O)C4CC4)c3cc2C12CC2	gamma_fused	Sodium channel protein type IX alpha subunit,Homo sapiens										1.66234										1
InChI=1S/C23H22N4O7/c28-20-13-32-9-8-26(20)15-6-7-16-18(10-15)33-12-17-19(34-23(31)27(16)17)11-24-21(29)22(30)25-14-4-2-1-3-5-14/h1-7,10,17,19H,8-9,11-13H2,(H,24,29)(H,25,30)	4641	1	O=C(NCC1OC(=O)N2c3ccc(N4CCOCC4=O)cc3OCC12)C(=O)Nc1ccccc1	delta_single	Coagulation factor X,Homo sapiens										1.67391										1
InChI=1S/C23H22N5O/c1-16-23(12-4-5-13-23)14-21(29)28(16)15-17-8-10-18(11-9-17)19-6-2-3-7-20(19)22-24-26-27-25-22/h2-3,6-11H,1,4-5,12-15H2/q-1	4642	1	C=C1N(Cc2ccc(-c3ccccc3-c3nn[n-]n3)cc2)C(=O)CC12CCCC2	gamma_spiro	Angiotensin II type 1a (AT-1a) receptor,Bos taurus										1.15										1
InChI=1S/C23H23N3O3S/c27-22-18(21-24-19-10-4-5-11-20(19)30(28,29)25-21)12-15-23(13-6-7-14-23)26(22)16-17-8-2-1-3-9-17/h1-5,8-12H,6-7,13-16H2,(H,24,25)	4648	1	O=C1C(C2=NS(=O)(=O)c3ccccc3N2)=CCC2(CCCC2)N1Cc1ccccc1	delta_spiro	Hepatitis C virus,Hepatitis C virus										1.17526										1
InChI=1S/C23H23N3O3S/c27-22-18(21-24-19-10-4-5-11-20(19)30(28,29)25-21)14-23(12-6-7-13-23)16-26(22)15-17-8-2-1-3-9-17/h1-5,8-11,14H,6-7,12-13,15-16H2,(H,24,25)	4649	1	O=C1C(C2=NS(=O)(=O)c3ccccc3N2)=CC2(CCCC2)CN1Cc1ccccc1	delta_spiro	Hepatitis C virus,Hepatitis C virus										1.17526										1
InChI=1S/C23H23N3O3S/c27-23-18(22-24-19-10-4-5-12-21(19)30(28,29)25-22)15-17-9-6-11-20(17)26(23)14-13-16-7-2-1-3-8-16/h1-5,7-8,10,12,15,17,20H,6,9,11,13-14H2,(H,24,25)	4650	1	O=C1C(C2=NS(=O)(=O)c3ccccc3N2)=CC2CCCC2N1CCc1ccccc1	delta_fused	Hepatitis C virus,Hepatitis C virus										1.17526										1
InChI=1S/C23H23N3O3S/c27-23-18(22-24-19-11-5-7-13-21(19)30(28,29)25-22)14-17-10-4-6-12-20(17)26(23)15-16-8-2-1-3-9-16/h1-3,5,7-9,11,13-14,17,20H,4,6,10,12,15H2,(H,24,25)	4651	1	O=C1C(C2=NS(=O)(=O)c3ccccc3N2)=CC2CCCCC2N1Cc1ccccc1	delta_fused	Hepatitis C virus,Hepatitis C virus										1.17526										1
InChI=1S/C23H23N3O3S/c27-23-19(22-24-20-8-4-5-9-21(20)30(28,29)25-22)13-18(12-16-10-11-16)15-26(23)14-17-6-2-1-3-7-17/h1-9,13,16,18H,10-12,14-15H2,(H,24,25)	4652	1	O=C1C(C2=NS(=O)(=O)c3ccccc3N2)=CC(CC2CC2)CN1Cc1ccccc1	delta_single	Hepatitis C virus,Hepatitis C virus										1.17526										1
InChI=1S/C23H23N3O6/c27-18(21(29)24-14-17-9-5-2-6-10-17)15-25-23(31)32-19-11-12-26(22(19)30)20(28)13-16-7-3-1-4-8-16/h1-10,19H,11-15H2,(H,24,29)(H,25,31)	4653	1	O=C(NCC(=O)C(=O)NCc1ccccc1)OC1CCN(C(=O)Cc2ccccc2)C1=O	gamma_single	Cathepsin K,Homo sapiens										1.20588										1
InChI=1S/C23H23N3O7/c27-18(20(28)24-13-16-7-3-1-4-8-16)14-25-22(30)33-19-11-12-26(21(19)29)23(31)32-15-17-9-5-2-6-10-17/h1-10,19H,11-15H2,(H,24,28)(H,25,30)	4654	1	O=C(NCC(=O)C(=O)NCc1ccccc1)OC1CCN(C(=O)OCc2ccccc2)C1=O	gamma_single	Cathepsin K,Homo sapiens										1.20588										1
InChI=1S/C23H23N5O3S/c29-19-11-18-23(31)28-9-4-8-26(14-20-24-7-10-32-20)21(28)15-27(18)13-17(19)22(30)25-12-16-5-2-1-3-6-16/h1-3,5-7,10-11,13,21H,4,8-9,12,14-15H2,(H,25,30)/p+1	4656	1	O=C(NCc1ccccc1)c1cn2c(cc1=O)C(=O)N1CCC[NH+](Cc3nccs3)C1C2	delta_fused	Human immunodeficiency virus 1,Human immunodeficiency virus 1										1.54167										1
InChI=1S/C23H23N5O3S/c29-20-19-4-2-1-3-16(19)13-28(20)15-23(21(30)25-22(31)26-23)8-7-17-5-6-18(32-17)14-27-11-9-24-10-12-27/h1-6,24H,9-15H2,(H2,25,26,30,31)/p+2	4657	1	O=C1NC(=O)C(C#Cc2ccc(C[NH+]3CC[NH2+]CC3)s2)(CN2Cc3ccccc3C2=O)N1	gamma_fused	TNF-alpha,Homo sapiens										1.40099										1
InChI=1S/C23H24N2O2/c26-23-19-16-21(22-12-7-15-27-22)25(18-10-5-2-6-11-18)20(19)13-14-24(23)17-8-3-1-4-9-17/h2,5-7,10-12,15-17H,1,3-4,8-9,13-14H2	4661	1	O=C1c2cc(-c3ccco3)n(-c3ccccc3)c2CCN1C1CCCCC1	delta_fused	Cannabinoid CB1 receptor,Homo sapiens										1.3										1
InChI=1S/C23H24N2OS/c26-23-19-16-21(22-12-7-15-27-22)25(18-10-5-2-6-11-18)20(19)13-14-24(23)17-8-3-1-4-9-17/h2,5-7,10-12,15-17H,1,3-4,8-9,13-14H2	4664	1	O=C1c2cc(-c3cccs3)n(-c3ccccc3)c2CCN1C1CCCCC1	delta_fused	Cannabinoid CB1 receptor,Homo sapiens										1.3										1
InChI=1S/C23H24N2OS/c26-23-20-15-22(17-12-14-27-16-17)25(19-9-5-2-6-10-19)21(20)11-13-24(23)18-7-3-1-4-8-18/h2,5-6,9-10,12,14-16,18H,1,3-4,7-8,11,13H2	4665	1	O=C1c2cc(-c3ccsc3)n(-c3ccccc3)c2CCN1C1CCCCC1	delta_fused	Cannabinoid CB1 receptor,Homo sapiens										1.3										1
InChI=1S/C23H24N4O/c28-22-14-19(17-5-2-1-3-6-17)16-27(22)20-13-18-7-4-8-21(23(18)25-15-20)26-11-9-24-10-12-26/h1-8,13,15,19,24H,9-12,14,16H2/p+1	4666	1	O=C1CC(c2ccccc2)CN1c1cnc2c(N3CC[NH2+]CC3)cccc2c1	gamma_single	Serotonin 6 (5-HT6) receptor,Homo sapiens										2.33333										1
InChI=1S/C23H24N4O3S2/c24-23(25-10-3-11-25)18-8-6-17(7-9-18)15-26-12-13-27(16-21(26)28)32(29,30)22-14-19-4-1-2-5-20(19)31-22/h1-2,4-9,14,24H,3,10-13,15-16H2/p+1	4669	1	[NH2+]=C(c1ccc(CN2CCN(S(=O)(=O)c3cc4ccccc4s3)CC2=O)cc1)N1CCC1	delta_single	Coagulation factor X,Homo sapiens										1.67391										1
InChI=1S/C23H24N4O6/c28-18(20(29)24-13-16-7-3-1-4-8-16)15-26-23(32)33-19-11-12-27(21(19)30)22(31)25-14-17-9-5-2-6-10-17/h1-10,19H,11-15H2,(H,24,29)(H,25,31)(H,26,32)	4670	1	O=C(NCC(=O)C(=O)NCc1ccccc1)OC1CCN(C(=O)NCc2ccccc2)C1=O	gamma_single	Cathepsin K,Homo sapiens										1.20588										1
InChI=1S/C23H24N5O/c29-23-19(14-21-24-26-27-25-21)13-20(17-7-3-1-4-8-17)22(18-9-5-2-6-10-18)28(23)15-16-11-12-16/h1-10,16,19-20,22H,11-15H2/q-1	4671	1	O=C1C(Cc2nnn[n-]2)CC(c2ccccc2)C(c2ccccc2)N1CC1CC1	delta_single	Tumour suppressor p53/oncoprotein Mdm2,Homo sapiens										2.48718										1
InChI=1S/C23H24N6O/c30-21-14-18-15-25-23(27-22(18)29(21)16-17-4-2-1-3-5-17)26-19-6-8-20(9-7-19)28-12-10-24-11-13-28/h1-9,15,24H,10-14,16H2,(H,25,26,27)/p+1	4672	1	O=C1Cc2cnc(Nc3ccc(N4CC[NH2+]CC4)cc3)nc2N1Cc1ccccc1	gamma_fused	Tyrosine-protein kinase JAK3,Homo sapiens										1.27273										1
InChI=1S/C23H24N6O/c30-22-20-14-18(7-6-16(20)15-29(22)19-8-11-24-12-9-19)27-23-25-13-10-21(28-23)26-17-4-2-1-3-5-17/h1-7,10,13-14,19,24H,8-9,11-12,15H2,(H2,25,26,27,28)	4673	1	O=C1c2cc(Nc3nccc(Nc4ccccc4)n3)ccc2CN1C1CCNCC1	gamma_fused	ALK tyrosine kinase receptor,Homo sapiens										1.25										1
InChI=1S/C23H25N3O3/c27-19-13-7-12-18-21(19)20(23(29)25(18)15-8-3-1-4-9-15)17-14-24-26(22(17)28)16-10-5-2-6-11-16/h2,5-6,10-11,14-15,20,24H,1,3-4,7-9,12-13H2	4677	1	O=C1CCCC2=C1C(c1c[nH]n(-c3ccccc3)c1=O)C(=O)N2C1CCCCC1	gamma_fused	Elongation of very long chain fatty acids protein 6,Homo sapiens										1.36										1
InChI=1S/C23H25N5O2/c29-22-21-14-18(16-27(21)10-11-28(22)15-17-4-2-1-3-5-17)20-6-9-24-23(26-20)25-19-7-12-30-13-8-19/h1-6,9,14,16,19H,7-8,10-13,15H2,(H,24,25,26)	4678	1	O=C1c2cc(-c3ccnc(NC4CCOCC4)n3)cn2CCN1Cc1ccccc1	delta_fused	MAP kinase ERK2,Homo sapiens										1.71429										1
InChI=1S/C23H25N5O3/c29-23-20-13-24-14-26-22(20)30-12-11-28(23)19-8-6-18(7-9-19)17-4-1-16(2-5-17)3-10-21-25-15-27-31-21/h6-9,13-17H,1-5,10-12H2	4680	1	O=C1c2cncnc2OCCN1c1ccc(C2CCC(CCc3ncno3)CC2)cc1	epsilon_fused	Diacylglycerol O-acyltransferase 1,Homo sapiens										1.17808										1
InChI=1S/C23H25N5O3S/c24-23(26-10-3-11-26)18-8-6-17(7-9-18)15-27-12-13-28(16-22(27)29)32(30,31)21-14-19-4-1-2-5-20(19)25-21/h1-2,4-9,14,24-25H,3,10-13,15-16H2/p+1	4681	1	[NH2+]=C(c1ccc(CN2CCN(S(=O)(=O)c3cc4ccccc4[nH]3)CC2=O)cc1)N1CCC1	delta_single	Coagulation factor X,Homo sapiens										1.67391										1
InChI=1S/C23H25N5OS/c29-21-6-2-13-28(21)19-9-7-16(8-10-19)22-26-15-20(30-22)17-4-1-5-18(14-17)27-23-24-11-3-12-25-23/h1,3-5,11-12,14-16,19H,2,6-10,13H2,(H,24,25,27)	4682	1	O=C1CCCN1C1CCC(c2ncc(-c3cccc(Nc4ncccn4)c3)s2)CC1	gamma_single	Tyrosine-protein kinase SYK,Homo sapiens										1.1										1
InChI=1S/C23H26N2O2/c26-21(12-11-19-7-3-1-4-8-19)24-15-13-23(14-16-24)17-22(27)25(18-23)20-9-5-2-6-10-20/h1-10H,11-18H2	4684	1	O=C(CCc1ccccc1)N1CCC2(CC1)CC(=O)N(c1ccccc1)C2	gamma_spiro	Integrin alpha-IIb/beta-3,Homo sapiens										1.70213										1
InChI=1S/C23H26N2O2S/c26-22-8-4-14-25(22)15-5-13-24-23(27)21-16-20(21)17-9-11-19(12-10-17)28-18-6-2-1-3-7-18/h1-3,6-7,9-12,20-21H,4-5,8,13-16H2,(H,24,27)	4687	1	O=C(NCCCN1CCCC1=O)C1CC1c1ccc(Sc2ccccc2)cc1	gamma_single	Intercellular adhesion molecule (ICAM-1), Integrin alpha-L/beta-2,Homo sapiens										1.69231										1
InChI=1S/C23H26N2O3/c26-21-13-7-8-14-25(21)20-15-23(24-22(20)27,19-11-5-2-6-12-19)17-28-16-18-9-3-1-4-10-18/h1-6,9-12,20H,7-8,13-17H2,(H,24,27)	4688	1	O=C1NC(COCc2ccccc2)(c2ccccc2)CC1N1CCCCC1=O	delta_single	Meriones unguiculatus,Meriones unguiculatus										1.18182										1
InChI=1S/C23H27N3O2S/c27-22-6-1-2-10-26(22)17-20-8-7-19(29-20)16-24-11-13-25(14-12-24)21-5-3-4-18-9-15-28-23(18)21/h3-5,7-9,15H,1-2,6,10-14,16-17H2/p+1	4692	1	O=C1CCCCN1Cc1ccc(C[NH+]2CCN(c3cccc4ccoc34)CC2)s1	delta_single	Rattus norvegicus,Rattus norvegicus										2.39726										1
InChI=1S/C23H27N3O4/c27-22-23(28)26(10-9-25(22)18-19-5-2-1-3-6-19)20-7-4-8-21(17-20)30-16-13-24-11-14-29-15-12-24/h1-8,17H,9-16,18H2/p+1	4693	1	O=C1C(=O)N(c2cccc(OCC[NH+]3CCOCC3)c2)CCN1Cc1ccccc1	delta_single	P2X purinoceptor 7,Homo sapiens										1.08088										1
InChI=1S/C23H28N2O2/c26-22-12-7-15-25(22)21-13-14-23(24-16-21,20-10-5-2-6-11-20)18-27-17-19-8-3-1-4-9-19/h1-6,8-11,21,24H,7,12-18H2/p+1	4699	1	O=C1CCCN1C1CCC(COCc2ccccc2)(c2ccccc2)[NH2+]C1	gamma_single	Meriones unguiculatus,Meriones unguiculatus										1.18182										1
InChI=1S/C23H28N2O3S/c26-23-7-4-16-25(23)21-12-8-18(9-13-21)17-24-29(27,28)22-14-10-20(11-15-22)19-5-2-1-3-6-19/h1-3,5-6,10-11,14-15,18,21,24H,4,7-9,12-13,16-17H2	4700	1	O=C1CCCN1C1CCC(CNS(=O)(=O)c2ccc(-c3ccccc3)cc2)CC1	gamma_single	Matrix metalloproteinase 13,Homo sapiens										2										1
InChI=1S/C23H28N2O4S/c26-22(24-14-10-20(11-15-24)25-13-4-3-7-23(25)27)12-16-30(28,29)21-9-8-18-5-1-2-6-19(18)17-21/h1-2,5-6,8-9,17,20H,3-4,7,10-16H2	4701	1	O=C(CCS(=O)(=O)c1ccc2ccccc2c1)N1CCC(N2CCCCC2=O)CC1	delta_single	Coagulation factor X,Homo sapiens										1.67391										1
InChI=1S/C23H28N4O2/c28-22-18-24-11-12-27(22)21(17-19-7-3-1-4-8-19)23(29)26-15-13-25(14-16-26)20-9-5-2-6-10-20/h1-10,21,24H,11-18H2/p+1	4702	1	O=C(C(Cc1ccccc1)N1CC[NH2+]CC1=O)N1CCN(c2ccccc2)CC1	delta_single	Melanocortin receptor 4,Homo sapiens										1.33333										1
InChI=1S/C23H28N6O3S/c30-17-3-1-6-28(17)7-2-5-24-21-20-19(25-14-26-21)18-15-4-10-32-13-16(15)22(27-23(18)33-20)29-8-11-31-12-9-29/h14H,1-13H2,(H,24,25,26)	4705	1	O=C1CCCN1CCCNc1ncnc2c1sc1nc(N3CCOCC3)c3c(c12)CCOC3	gamma_single	Phosphodiesterase 4B,Homo sapiens										1.2										1
InChI=1S/C23H29N5O4S/c29-22(25-9-10-26-33(31,32)20-4-2-1-3-5-20)17-28-13-8-18-6-7-19(16-21(18)23(28)30)27-14-11-24-12-15-27/h1-7,16,24,26H,8-15,17H2,(H,25,29)/p+1	4709	1	O=C(CN1CCc2ccc(N3CC[NH2+]CC3)cc2C1=O)NCCNS(=O)(=O)c1ccccc1	delta_fused	Integrin alpha-IIb/beta-3,Homo sapiens										1.70213										1
InChI=1S/C23H33N3O3/c27-21(24-14-13-18-8-3-1-4-9-18)17-25-23(29)20(26-15-7-12-22(26)28)16-19-10-5-2-6-11-19/h2,5-6,10-11,18,20H,1,3-4,7-9,12-17H2,(H,24,27)(H,25,29)	4715	1	O=C(CNC(=O)C(Cc1ccccc1)N1CCCC1=O)NCCC1CCCCC1	gamma_single	Renin,Homo sapiens										1.09804										1
InChI=1S/C24H16N2O2/c27-24-20-7-1-3-10-21(20)25-13-16-12-15(14-26(16)24)17-8-5-9-19-18-6-2-4-11-22(18)28-23(17)19/h1-11,13-14,16H,12H2	4719	1	O=C1c2ccccc2N=CC2CC(c3cccc4c3oc3ccccc34)=CN12	epsilon_fused	K562,Homo sapiens										1.55462										1
InChI=1S/C24H16N2OS/c27-24-20-7-1-3-10-21(20)25-13-16-12-15(14-26(16)24)17-8-5-9-19-18-6-2-4-11-22(18)28-23(17)19/h1-11,13-14,16H,12H2	4723	1	O=C1c2ccccc2N=CC2CC(c3cccc4c3sc3ccccc34)=CN12	epsilon_fused	K562,Homo sapiens										1.55462										1
InChI=1S/C24H17N5O3/c30-21-20-6-2-1-4-18(20)14-29(21)15-24(22(31)27-23(32)28-24)8-7-16-10-19(13-26-11-16)17-5-3-9-25-12-17/h1-6,9-13H,14-15H2,(H2,27,28,31,32)	4728	1	O=C1NC(=O)C(C#Cc2cncc(-c3cccnc3)c2)(CN2Cc3ccccc3C2=O)N1	gamma_fused	TNF-alpha,Homo sapiens										1.40099										1
InChI=1S/C24H17N5O4/c30-20-18(6-3-11-25-20)19-8-7-15(12-26-19)9-10-24(22(32)27-23(33)28-24)14-29-13-16-4-1-2-5-17(16)21(29)31/h1-8,11-12H,13-14H2,(H,25,30)(H2,27,28,32,33)	4729	1	O=C1NC(=O)C(C#Cc2ccc(-c3ccc[nH]c3=O)nc2)(CN2Cc3ccccc3C2=O)N1	gamma_fused	TNF-alpha,Homo sapiens										1.40099										1
InChI=1S/C24H17NOS/c26-23-20-11-5-6-12-21(20)24(25(23)13-14-27-24)22-18-9-3-1-7-16(18)15-17-8-2-4-10-19(17)22/h1-12,15H,13-14H2	4730	1	O=C1c2ccccc2C2(c3c4ccccc4cc4ccccc34)SCCN12	gamma_fused	Human immunodeficiency virus type 1 reverse transcriptase,Human immunodeficiency virus 1										4										1
InChI=1S/C24H18N2O/c27-24-22-8-4-5-9-23(22)25-15-21-14-20(16-26(21)24)19-12-10-18(11-13-19)17-6-2-1-3-7-17/h1-13,15-16,21H,14H2	4731	1	O=C1c2ccccc2N=CC2CC(c3ccc(-c4ccccc4)cc3)=CN12	epsilon_fused	K562,Homo sapiens										1.55462										1
InChI=1S/C24H18N2O2/c27-24-22-8-4-5-9-23(22)25-15-19-14-18(16-26(19)24)17-10-12-21(13-11-17)28-20-6-2-1-3-7-20/h1-13,15-16,19H,14H2	4732	1	O=C1c2ccccc2N=CC2CC(c3ccc(Oc4ccccc4)cc3)=CN12	epsilon_fused	K562,Homo sapiens										1.55462										1
InChI=1S/C24H19N3O2/c28-23-21-19(12-7-13-25-21)20(18-10-5-2-6-11-18)22-24(29)26(14-15-27(22)23)16-17-8-3-1-4-9-17/h1-13H,14-16H2	4734	1	O=C1c2c(-c3ccccc3)c3cccnc3c(=O)n2CCN1Cc1ccccc1	delta_fused	Neurokinin 1 receptor,Homo sapiens										1.14667										1
InChI=1S/C24H19N5O3/c30-23-21-14-25-16-27-22(21)32-13-12-29(23)20-8-6-19(7-9-20)18-4-2-17(3-5-18)15-28-11-1-10-26-24(28)31/h1-11,14,16H,12-13,15H2	4736	1	O=C1c2cncnc2OCCN1c1ccc(-c2ccc(Cn3cccnc3=O)cc2)cc1	epsilon_fused	Diacylglycerol O-acyltransferase 1,Homo sapiens										1.17808										1
InChI=1S/C24H19N5O4/c30-21-10-25-24(31)18-9-15-14-7-12(16-5-6-26-28-16)1-3-17(14)27-22(15)23(29(18)21)13-2-4-19-20(8-13)33-11-32-19/h1-8,18,23,27H,9-11H2,(H,25,31)(H,26,28)	4737	1	O=C1NCC(=O)N2C1Cc1c([nH]c3ccc(-c4ccn[nH]4)cc13)C2c1ccc2c(c1)OCO2	delta_fused	Class 1 phosphodiesterase PDEB1,Trypanosoma brucei										9										1
InChI=1S/C24H19N7O4/c32-20-8-10-25-19(28-20)12-27-17-6-5-16(26-11-17)7-9-24(22(34)29-23(35)30-24)14-31-13-15-3-1-2-4-18(15)21(31)33/h1-6,8,10-11,27H,12-14H2,(H,25,28,32)(H2,29,30,34,35)	4739	1	O=C1NC(=O)C(C#Cc2ccc(NCc3nccc(=O)[nH]3)cn2)(CN2Cc3ccccc3C2=O)N1	gamma_fused	TNF-alpha,Homo sapiens										1.40099										1
InChI=1S/C24H19NO2/c26-24-21(16-20-15-18-11-7-8-14-22(18)27-20)23(17-9-3-1-4-10-17)25(24)19-12-5-2-6-13-19/h1-15,21,23H,16H2	4740	1	O=C1C(Cc2cc3ccccc3o2)C(c2ccccc2)N1c1ccccc1	beta_single	Cannabinoid CB1 receptor,Homo sapiens										1.3										1
InChI=1S/C24H20N2O5S2/c27-20(25-33(29)21-10-5-15-32-21)12-11-18-8-4-9-19-22(18)26(16-17-6-2-1-3-7-17)23(28)24(19)30-13-14-31-24/h1-12,15,33H,13-14,16H2/b12-11+	4748	1	O=C(/C=C/c1cccc2c1N(Cc1ccccc1)C(=O)C21OCCO1)N=[SH](=O)c1cccs1	gamma_fused	Prostanoid EP3 receptor,Homo sapiens										1.05										1
InChI=1S/C24H20N4O2/c29-23-6-3-15-27(23)20-11-8-19(9-12-20)26-24(30)22-13-14-25-28(22)21-10-7-17-4-1-2-5-18(17)16-21/h1-2,4-5,7-14,16H,3,6,15H2,(H,26,30)	4751	1	O=C(Nc1ccc(N2CCCC2=O)cc1)c1ccnn1-c1ccc2ccccc2c1	gamma_single	Coagulation factor X,Homo sapiens										1.67391										1
InChI=1S/C24H20N4O4/c29-20-10-9-19(25-20)16-7-5-15(6-8-16)11-12-24(22(31)26-23(32)27-24)14-28-13-17-3-1-2-4-18(17)21(28)30/h1-8,19H,9-10,13-14H2,(H,25,29)(H2,26,27,31,32)	4754	1	O=C1CCC(c2ccc(C#CC3(CN4Cc5ccccc5C4=O)NC(=O)NC3=O)cc2)N1	gamma_fused	TNF-alpha,Homo sapiens										1.40099										1
InChI=1S/C24H21N3O3/c28-20-13-7-12-19-22(20)21(24(30)26(19)15-16-8-3-1-4-9-16)18-14-25-27(23(18)29)17-10-5-2-6-11-17/h1-6,8-11,14,21,25H,7,12-13,15H2	4756	1	O=C1CCCC2=C1C(c1c[nH]n(-c3ccccc3)c1=O)C(=O)N2Cc1ccccc1	gamma_fused	Elongation of very long chain fatty acids protein 6,Homo sapiens										1.36										1
InChI=1S/C24H21N3O3S3/c28-20(26-33(30)21-10-5-14-31-21)12-11-18-8-4-9-19-22(18)27(16-17-6-2-1-3-7-17)23(29)24(19)25-13-15-32-24/h1-12,14,25,33H,13,15-16H2/p+1/b12-11+	4759	1	O=C(/C=C/c1cccc2c1N(Cc1ccccc1)C(=O)C21[NH2+]CCS1)N=[SH](=O)c1cccs1	gamma_fused	Prostanoid EP3 receptor,Homo sapiens										1.05										1
InChI=1S/C24H21N3O4/c28-21-11-19-24(30)27-20(17-9-5-2-6-10-17)15-31-22(27)14-26(19)13-18(21)23(29)25-12-16-7-3-1-4-8-16/h1-11,13,20,22H,12,14-15H2,(H,25,29)	4760	1	O=C(NCc1ccccc1)c1cn2c(cc1=O)C(=O)N1C(C2)OCC1c1ccccc1	delta_fused	Human immunodeficiency virus,Human immunodeficiency virus										1.03448										1
InChI=1S/C24H21N3O6S/c28-17(21(29)25-13-15-6-2-1-3-7-15)14-26-24(32)33-18-10-11-27(22(18)30)23(31)20-12-16-8-4-5-9-19(16)34-20/h1-9,12,18H,10-11,13-14H2,(H,25,29)(H,26,32)	4763	1	O=C(NCC(=O)C(=O)NCc1ccccc1)OC1CCN(C(=O)c2cc3ccccc3s2)C1=O	gamma_single	Cathepsin K,Homo sapiens										1.20588										1
InChI=1S/C24H21N5O2/c30-21-11-20(16-7-3-1-4-8-16)29(21)23(17-9-5-2-6-10-17)24(31)27-14-19-22-18(13-26-19)12-25-15-28-22/h1-10,12-13,15,19-20,23H,11,14H2,(H,27,31)	4764	1	O=C(NCC1N=Cc2cncnc21)C(c1ccccc1)N1C(=O)CC1c1ccccc1	beta_single	Human immunodeficiency virus type 1 protease,Human immunodeficiency virus 1										1.04878										1
InChI=1S/C24H21N5O2/c30-23-16-25-13-14-28(23)20-9-6-19(7-10-20)27-24(31)22-11-12-26-29(22)21-8-5-17-3-1-2-4-18(17)15-21/h1-12,15,25H,13-14,16H2,(H,27,31)/p+1	4765	1	O=C(Nc1ccc(N2CC[NH2+]CC2=O)cc1)c1ccnn1-c1ccc2ccccc2c1	delta_single	Coagulation factor X,Homo sapiens										1.67391										1
InChI=1S/C24H21N5O3/c30-21(26-18-10-3-1-4-11-18)16-29-20-14-8-7-9-17(20)15-25-22(23(29)31)28-24(32)27-19-12-5-2-6-13-19/h1-15,22H,16H2,(H,26,30)(H2,27,28,32)	4767	1	O=C(CN1C(=O)C(NC(=O)Nc2ccccc2)N=Cc2ccccc21)Nc1ccccc1	epsilon_fused	Cavia porcellus,Cavia porcellus										2.81818										1
InChI=1S/C24H21N5O3/c30-21(26-18-10-3-1-4-11-18)16-29-20-14-8-7-9-17(20)15-25-22(23(29)31)28-24(32)27-19-12-5-2-6-13-19/h1-15,22H,16H2,(H,26,30)(H2,27,28,32)/p+1	4768	1	O=C(CN1C(=O)C(NC(=O)Nc2ccccc2)[NH+]=Cc2ccccc21)Nc1ccccc1	epsilon_fused	Cavia porcellus,Cavia porcellus										2.81818										1
InChI=1S/C24H21N5O3/c30-21-20-4-2-1-3-17(20)13-29(21)14-24(22(31)27-23(32)28-24)12-11-16-5-7-18(8-6-16)25-15-26-19-9-10-19/h1-8,15,19H,9-10,13-14H2,(H,25,26)(H2,27,28,31,32)	4769	1	O=C1NC(=O)C(C#Cc2ccc(N=CNC3CC3)cc2)(CN2Cc3ccccc3C2=O)N1	gamma_fused	TNF-alpha,Homo sapiens										1.40099										1
InChI=1S/C24H21N5O5/c30-21-15-34-14-13-29(21)17-10-8-16(9-11-17)26-22(31)18-5-1-2-6-19(18)27-23(32)24(33)28-20-7-3-4-12-25-20/h1-12H,13-15H2,(H,26,31)(H,27,32)(H,25,28,33)	4771	1	O=C(Nc1ccccn1)C(=O)Nc1ccccc1C(=O)Nc1ccc(N2CCOCC2=O)cc1	delta_single	Coagulation factor X,Homo sapiens										1.67391										1
InChI=1S/C24H21N7O2/c32-23-21(26-22-11-18-13-25-8-9-31(18)29-22)12-20(27-28-23)15-5-3-6-17(10-15)30-14-16-4-1-2-7-19(16)24(30)33/h1-7,10-12,25H,8-9,13-14H2,(H,28,32)(H,26,27,29)/p+1	4772	1	O=C1c2ccccc2CN1c1cccc(-c2cc(Nc3cc4n(n3)CC[NH2+]C4)c(=O)[nH]n2)c1	gamma_fused	Tyrosine-protein kinase BTK,Homo sapiens										1.07317										1
InChI=1S/C24H21NO2/c26-23-24(17-27-22(24)20-14-8-3-9-15-20)21(19-12-6-2-7-13-19)25(23)16-18-10-4-1-5-11-18/h1-15,21-22H,16-17H2	4774	1	O=C1N(Cc2ccccc2)C(c2ccccc2)C12COC2c1ccccc1	beta_spiro	Acyl-CoA:cholesterol acyltransferase,Oryctolagus cuniculus										1.33333										1
InChI=1S/C24H22N2O2/c27-22-16-21(19-12-6-2-7-13-19)26(22)23(20-14-8-3-9-15-20)24(28)25-17-18-10-4-1-5-11-18/h1-15,21,23H,16-17H2,(H,25,28)	4777	1	O=C(NCc1ccccc1)C(c1ccccc1)N1C(=O)CC1c1ccccc1	beta_single	Human immunodeficiency virus type 1 protease,Human immunodeficiency virus 1										1.04878										1
InChI=1S/C24H22N2O3/c27-22-14-19(24-25-11-12-28-24)13-20-23(18-9-5-2-6-10-18)21(15-26(20)22)29-16-17-7-3-1-4-8-17/h1-12,14,20-21,23H,13,15-16H2	4784	1	O=C1C=C(c2ncco2)CC2C(c3ccccc3)C(OCc3ccccc3)CN12	delta_fused	Neurokinin 1 receptor,Homo sapiens										1.14667										1
InChI=1S/C24H22N2O3/c27-23(25-20-9-5-2-6-10-20)17-22-24(28)26(15-16-29-22)21-13-11-19(12-14-21)18-7-3-1-4-8-18/h1-14,22H,15-17H2,(H,25,27)	4785	1	O=C(CC1OCCN(c2ccc(-c3ccccc3)cc2)C1=O)Nc1ccccc1	delta_single	Coagulation factor IX,Homo sapiens										1.5										1
InChI=1S/C24H22N2O3/c27-23-12-19(20-13-25-29-16-20)11-21-24(18-9-5-2-6-10-18)22(14-26(21)23)28-15-17-7-3-1-4-8-17/h1-10,12-13,16,21-22,24H,11,14-15H2	4786	1	O=C1C=C(c2cnoc2)CC2C(c3ccccc3)C(OCc3ccccc3)CN12	delta_fused	Neurokinin 1 receptor,Homo sapiens										1.14667										1
InChI=1S/C24H22N4O3/c29-22(27-10-1-11-27)14-17-2-4-18(5-3-17)19-6-8-20(9-7-19)28-12-13-31-23-21(24(28)30)15-25-16-26-23/h2-9,15-16H,1,10-14H2	4792	1	O=C(Cc1ccc(-c2ccc(N3CCOc4ncncc4C3=O)cc2)cc1)N1CCC1	epsilon_fused	Diacylglycerol O-acyltransferase 1,Homo sapiens										1.17808										1
InChI=1S/C24H22N4O3/c29-22-10-4-6-16-28(22)18-13-11-17(12-14-18)23(30)26-20-8-2-1-7-19(20)24(31)27-21-9-3-5-15-25-21/h1-3,5,7-9,11-15H,4,6,10,16H2,(H,26,30)(H,25,27,31)	4793	1	O=C(Nc1ccccc1C(=O)Nc1ccccn1)c1ccc(N2CCCCC2=O)cc1	delta_single	Oryctolagus cuniculus,Oryctolagus cuniculus										2										1
InChI=1S/C24H22N4O6/c29-19(21(30)26-13-15-4-2-1-3-5-15)14-27-24(33)34-20-9-11-28(23(20)32)22(31)17-6-7-18-16(12-17)8-10-25-18/h1-8,10,12,20,25H,9,11,13-14H2,(H,26,30)(H,27,33)	4794	1	O=C(NCC(=O)C(=O)NCc1ccccc1)OC1CCN(C(=O)c2ccc3[nH]ccc3c2)C1=O	gamma_single	Cathepsin K,Homo sapiens										1.20588										1
InChI=1S/C24H22N6O/c31-23-14-26-22(30-15-27-24(28-30)16-4-1-5-16)12-21-20-8-2-7-18(17-6-3-10-25-13-17)19(20)9-11-29(21)23/h2-3,6-8,10,12-13,15-16H,1,4-5,9,11,14H2	4795	1	O=C1CN=C(n2cnc(C3CCC3)n2)C=C2c3cccc(-c4cccnc4)c3CCN12	epsilon_fused	Metabotropic glutamate receptor 5,Homo sapiens										1.21229										1
InChI=1S/C24H22N6O2/c31-22-13-26-19-9-8-17(11-18(19)15-30(22)14-16-5-2-1-3-6-16)24(32)27-12-21-28-20-7-4-10-25-23(20)29-21/h1-11,26H,12-15H2,(H,27,32)(H,25,28,29)	4797	1	O=C(NCc1nc2ccc[nH]c-2n1)c1ccc2c(c1)CN(Cc1ccccc1)C(=O)CN2	epsilon_fused	HEK293,Homo sapiens										23										1
InChI=1S/C24H22N6O2S/c31-23-19(26-21-8-10-25-28-21)13-18(27-29-23)14-4-3-5-15(12-14)30-11-9-17-16-6-1-2-7-20(16)33-22(17)24(30)32/h3-5,8,10,12-13H,1-2,6-7,9,11H2,(H,29,31)(H2,25,26,27,28)	4798	1	O=C1c2sc3c(c2CCN1c1cccc(-c2cc(Nc4cc[nH]n4)c(=O)[nH]n2)c1)CCCC3	delta_fused	Tyrosine-protein kinase BTK,Homo sapiens										1.07317										1
InChI=1S/C24H22N6O2S/c31-23-22(28-15-11-26-27-12-15)29-19(13-25-23)14-4-3-5-16(10-14)30-9-8-18-17-6-1-2-7-20(17)33-21(18)24(30)32/h3-5,10-13H,1-2,6-9H2,(H,25,31)(H,26,27)(H,28,29)	4799	1	O=C1c2sc3c(c2CCN1c1cccc(-c2c[nH]c(=O)c(Nc4cn[nH]c4)n2)c1)CCCC3	delta_fused	Tyrosine-protein kinase BTK,Homo sapiens										1.07317										1
InChI=1S/C24H23N3O2/c28-23-16-25-22-15-21(26-24(29)19-9-5-2-6-10-19)12-11-20(22)17-27(23)14-13-18-7-3-1-4-8-18/h1-12,15,25H,13-14,16-17H2,(H,26,29)	4803	1	O=C(Nc1ccc2c(c1)NCC(=O)N(CCc1ccccc1)C2)c1ccccc1	epsilon_fused	Homo sapiens,Homo sapiens										1.31944										1
InChI=1S/C24H23N3O2/c28-23-20-15-22-24(29)26(17-19-9-5-2-6-10-19)13-14-27(22)21(20)11-12-25(23)16-18-7-3-1-4-8-18/h1-10,15H,11-14,16-17H2	4804	1	O=C1c2cc3n(c2CCN1Cc1ccccc1)CCN(Cc1ccccc1)C3=O	delta_fused	Integrase,Human immunodeficiency virus 1										2.96078										1
InChI=1S/C24H23N3O4/c28-22-15-21-24(30)26(13-14-31-19-9-5-2-6-10-19)11-12-27(21)17-20(22)23(29)25-16-18-7-3-1-4-8-18/h1-10,15,17H,11-14,16H2,(H,25,29)	4806	1	O=C(NCc1ccccc1)c1cn2c(cc1=O)C(=O)N(CCOc1ccccc1)CC2	delta_fused	Human immunodeficiency virus 1,Human immunodeficiency virus 1										1.54167										1
InChI=1S/C24H23N5O3/c30-21-19-4-2-1-3-18(19)14-29(21)15-24(22(31)27-23(32)28-24)10-7-16-5-6-20(26-13-16)17-8-11-25-12-9-17/h1-6,13,17,25H,8-9,11-12,14-15H2,(H2,27,28,31,32)/p+1	4809	1	O=C1NC(=O)C(C#Cc2ccc(C3CC[NH2+]CC3)nc2)(CN2Cc3ccccc3C2=O)N1	gamma_fused	TNF-alpha,Homo sapiens										1.40099										1
InChI=1S/C24H23N5O3/c30-21-19-7-3-2-6-18(19)15-29(21)16-24(22(31)26-23(32)27-24)11-10-17-8-9-20(25-14-17)28-12-4-1-5-13-28/h2-3,6-9,14H,1,4-5,12-13,15-16H2,(H2,26,27,31,32)	4810	1	O=C1NC(=O)C(C#Cc2ccc(N3CCCCC3)nc2)(CN2Cc3ccccc3C2=O)N1	gamma_fused	TNF-alpha,Homo sapiens										1.40099										1
InChI=1S/C24H23N5O3S/c30-21-20-4-2-1-3-18(20)14-29(21)16-24(22(31)26-23(32)27-24)8-7-17-5-6-19(25-13-17)15-28-9-11-33-12-10-28/h1-6,13H,9-12,14-16H2,(H2,26,27,31,32)/p+1	4811	1	O=C1NC(=O)C(C#Cc2ccc(C[NH+]3CCSCC3)nc2)(CN2Cc3ccccc3C2=O)N1	gamma_fused	TNF-alpha,Homo sapiens										1.40099										1
InChI=1S/C24H23N5O4/c30-21-20-4-2-1-3-18(20)14-29(21)16-24(22(31)26-23(32)27-24)8-7-17-5-6-19(25-13-17)15-28-9-11-33-12-10-28/h1-6,13H,9-12,14-16H2,(H2,26,27,31,32)/p+1	4812	1	O=C1NC(=O)C(C#Cc2ccc(C[NH+]3CCOCC3)nc2)(CN2Cc3ccccc3C2=O)N1	gamma_fused	TNF-alpha,Homo sapiens										1.40099										1
InChI=1S/C24H23N7O2/c32-22-5-3-12-31(22)13-11-26-23(33)21-15-16-14-17(6-7-18(16)29-21)28-24-27-10-8-20(30-24)19-4-1-2-9-25-19/h1-2,4,6-10,14-15,29H,3,5,11-13H2,(H,26,33)(H,27,28,30)	4813	1	O=C(NCCN1CCCC1=O)c1cc2cc(Nc3nccc(-c4ccccn4)n3)ccc2[nH]1	gamma_single	Tyrosine-protein kinase SYK,Homo sapiens										1.1										1
InChI=1S/C24H24N2O2/c27-23-13-12-22(26(23)17-19-6-2-1-3-7-19)24(28)25-15-14-18-10-11-20-8-4-5-9-21(20)16-18/h1-11,16,22H,12-15,17H2,(H,25,28)	4816	1	O=C(NCCc1ccc2ccccc2c1)C1CCC(=O)N1Cc1ccccc1	gamma_single	Integrin alpha-4/beta-1,Homo sapiens										1.21818										1
InChI=1S/C24H24N2O2/c27-23-14-13-22(26(23)17-18-7-2-1-3-8-18)24(28)25-16-15-20-11-6-10-19-9-4-5-12-21(19)20/h1-12,22H,13-17H2,(H,25,28)	4817	1	O=C(NCCc1cccc2ccccc12)C1CCC(=O)N1Cc1ccccc1	gamma_single	Integrin alpha-4/beta-1,Homo sapiens										1.21818										1
InChI=1S/C24H24N2O3/c27-24-22(15-18-10-11-20(29-18)16-25-12-4-1-5-13-25)21-8-2-3-9-23(21)26(24)17-19-7-6-14-28-19/h2-3,6-11,14-15H,1,4-5,12-13,16-17H2/p+1/b22-15+	4818	1	O=C1/C(=C/c2ccc(C[NH+]3CCCCC3)o2)c2ccccc2N1Cc1ccco1	gamma_fused	Protein-tyrosine phosphatase 1B,Homo sapiens										6.33333										1
InChI=1S/C24H24N4O3S/c29-23-15-31-12-9-28(23)16-1-3-18-21(13-16)25-20-5-4-19(26-24(18)20)22-6-2-17(32-22)14-27-7-10-30-11-8-27/h1-6,13,25H,7-12,14-15H2/p+1	4821	1	O=C1COCCN1c1ccc2c(c1)[nH]c1ccc(-c3ccc(C[NH+]4CCOCC4)s3)nc12	delta_single	Tyrosine-protein kinase JAK2,Homo sapiens										1.21053										1
InChI=1S/C24H24N5O/c1-17-14-24(12-4-5-13-24)15-22(30)29(17)16-18-8-10-19(11-9-18)20-6-2-3-7-21(20)23-25-27-28-26-23/h2-3,6-11H,1,4-5,12-16H2/q-1	4825	1	C=C1CC2(CCCC2)CC(=O)N1Cc1ccc(-c2ccccc2-c2nn[n-]n2)cc1	delta_spiro	Angiotensin II type 1a (AT-1a) receptor,Bos taurus										1.15										1
InChI=1S/C24H24N5O/c1-17-24(13-5-2-6-14-24)15-22(30)29(17)16-18-9-11-19(12-10-18)20-7-3-4-8-21(20)23-25-27-28-26-23/h3-4,7-12H,1-2,5-6,13-16H2/q-1	4826	1	C=C1N(Cc2ccc(-c3ccccc3-c3nn[n-]n3)cc2)C(=O)CC12CCCCC2	gamma_spiro	Angiotensin II type 1a (AT-1a) receptor,Bos taurus										1.15										1
InChI=1S/C24H24N6O3/c31-21-20-4-2-1-3-19(20)15-30(21)16-24(22(32)27-23(33)28-24)6-5-17-11-18(13-26-12-17)14-29-9-7-25-8-10-29/h1-4,11-13,25H,7-10,14-16H2,(H2,27,28,32,33)/p+2	4827	1	O=C1NC(=O)C(C#Cc2cncc(C[NH+]3CC[NH2+]CC3)c2)(CN2Cc3ccccc3C2=O)N1	gamma_fused	TNF-alpha,Homo sapiens										1.40099										1
InChI=1S/C24H25N3O/c28-24-22-21(17-26(25-22)16-18-10-4-1-5-11-18)23(19-12-6-2-7-13-19)27(24)20-14-8-3-9-15-20/h2-3,6-9,12-15,17-18,23H,1,4-5,10-11,16H2	4828	1	O=C1c2nn(CC3CCCCC3)cc2C(c2ccccc2)N1c1ccccc1	gamma_fused	p53-binding protein Mdm-2,Homo sapiens										1.24174										1
InChI=1S/C24H25N3O3S/c28-24-19(23-25-20-12-7-8-14-22(20)31(29,30)26-23)15-18-11-5-2-6-13-21(18)27(24)16-17-9-3-1-4-10-17/h1,3-4,7-10,12,14-15,18,21H,2,5-6,11,13,16H2,(H,25,26)	4830	1	O=C1C(C2=NS(=O)(=O)c3ccccc3N2)=CC2CCCCCC2N1Cc1ccccc1	delta_fused	Hepatitis C virus,Hepatitis C virus										1.17526										1
InChI=1S/C24H25N3O7/c28-19(21(29)25-15-18-9-5-2-6-10-18)16-26-23(31)34-20-11-13-27(22(20)30)24(32)33-14-12-17-7-3-1-4-8-17/h1-10,20H,11-16H2,(H,25,29)(H,26,31)	4833	1	O=C(NCC(=O)C(=O)NCc1ccccc1)OC1CCN(C(=O)OCCc2ccccc2)C1=O	gamma_single	Cathepsin K,Homo sapiens										1.20588										1
InChI=1S/C24H25N5O2/c30-23-21-11-17(13-28(21)9-4-10-29(23)12-16-5-2-1-3-6-16)20-7-8-25-24(26-20)27-22-18-14-31-15-19(18)22/h1-3,5-8,11,13,18-19,22H,4,9-10,12,14-15H2,(H,25,26,27)	4834	1	O=C1c2cc(-c3ccnc(NC4C5COCC54)n3)cn2CCCN1Cc1ccccc1	epsilon_fused	MAP kinase ERK2,Homo sapiens										1.71429										1
InChI=1S/C24H26N2O2/c27-23-15-12-17-7-2-4-10-19(17)21-13-14-22(26(21)23)24(28)25-20-11-5-8-16-6-1-3-9-18(16)20/h1-4,6-7,9-10,20-22H,5,8,11-15H2,(H,25,28)	4838	1	O=C(NC1CCCc2ccccc21)C1CCC2c3ccccc3CCC(=O)N12	epsilon_fused	MDA-MB-231,Homo sapiens										3.08791										1
InChI=1S/C24H26N2O3/c27-22-15-19(16-26(22)21-12-5-2-6-13-21)24(29)25-20-11-7-10-18(14-20)23(28)17-8-3-1-4-9-17/h1,3-4,7-11,14,19,21H,2,5-6,12-13,15-16H2,(H,25,29)	4840	1	O=C(c1ccccc1)c1cccc(NC(=O)C2CC(=O)N(C3CCCCC3)C2)c1	gamma_single	Enoyl-[acyl-carrier-protein] reductase,Mycobacterium tuberculosis										2.65789										1
InChI=1S/C24H26N2O3S/c27-22(25-30(29)21-12-5-2-6-13-21)15-14-19-10-7-11-20-16-23(28)26(24(19)20)17-18-8-3-1-4-9-18/h1-6,8-9,12-13,20,30H,7,10-11,14-17H2	4842	1	O=C(CCC1=C2C(CCC1)CC(=O)N2Cc1ccccc1)N=[SH](=O)c1ccccc1	gamma_fused	Prostanoid EP3 receptor,Homo sapiens										1.05										1
InChI=1S/C24H26N4O3S2/c25-24(26-11-3-4-12-26)19-9-7-18(8-10-19)16-27-13-14-28(17-22(27)29)33(30,31)23-15-20-5-1-2-6-21(20)32-23/h1-2,5-10,15,25H,3-4,11-14,16-17H2/p+1	4845	1	[NH2+]=C(c1ccc(CN2CCN(S(=O)(=O)c3cc4ccccc4s3)CC2=O)cc1)N1CCCC1	delta_single	Coagulation factor X,Homo sapiens										1.67391										1
InChI=1S/C24H26N4O6/c29-19(21(30)26-15-18-9-5-2-6-10-18)16-27-24(33)34-20-12-14-28(22(20)31)23(32)25-13-11-17-7-3-1-4-8-17/h1-10,20H,11-16H2,(H,25,32)(H,26,30)(H,27,33)	4846	1	O=C(NCC(=O)C(=O)NCc1ccccc1)OC1CCN(C(=O)NCCc2ccccc2)C1=O	gamma_single	Cathepsin K,Homo sapiens										1.20588										1
InChI=1S/C24H26N8O2/c33-22-4-3-11-32(22)10-2-1-8-26-23(34)20-13-16-12-17(5-6-18(16)30-20)29-24-27-9-7-19(31-24)21-14-25-15-28-21/h5-7,9,12-15,30H,1-4,8,10-11H2,(H,25,28)(H,26,34)(H,27,29,31)	4847	1	O=C(NCCCCN1CCCC1=O)c1cc2cc(Nc3nccc(-c4c[nH]cn4)n3)ccc2[nH]1	gamma_single	Tyrosine-protein kinase SYK,Homo sapiens										1.1										1
InChI=1S/C24H27N3O3/c28-22(17-9-3-1-4-10-17)25-19-13-7-8-14-21(19)27-16-15-20(24(27)30)26-23(29)18-11-5-2-6-12-18/h1-6,9-12,19-21H,7-8,13-16H2,(H,25,28)(H,26,29)	4849	1	O=C(NC1CCN(C2CCCCC2NC(=O)c2ccccc2)C1=O)c1ccccc1	gamma_single	C-C chemokine receptor type 2,Homo sapiens										1.11765										1
InChI=1S/C24H27N3O3/c28-22-7-4-16-26(22)20-10-8-18(9-11-20)14-15-25-24(30)21-12-13-23(29)27(21)17-19-5-2-1-3-6-19/h1-3,5-6,8-11,21H,4,7,12-17H2,(H,25,30)	4850	1	O=C(NCCc1ccc(N2CCCC2=O)cc1)C1CCC(=O)N1Cc1ccccc1	gamma_single	Integrin alpha-4/beta-1,Homo sapiens										1.21818										1
InChI=1S/C24H27N5O3S/c25-24(27-11-3-4-12-27)19-9-7-18(8-10-19)16-28-13-14-29(17-23(28)30)33(31,32)22-15-20-5-1-2-6-21(20)26-22/h1-2,5-10,15,25-26H,3-4,11-14,16-17H2/p+1	4854	1	[NH2+]=C(c1ccc(CN2CCN(S(=O)(=O)c3cc4ccccc4[nH]3)CC2=O)cc1)N1CCCC1	delta_single	Coagulation factor X,Homo sapiens										1.67391										1
InChI=1S/C24H28N10O2/c35-22-15-34(18-5-6-18)23(36)14-33(22)17-3-1-16(2-4-17)27-24-29-20(28-19-7-8-26-31-19)13-21(30-24)32-11-9-25-10-12-32/h1-4,7-8,13,18,25H,5-6,9-12,14-15H2,(H3,26,27,28,29,30,31)/p+1	4857	1	O=C1CN(C2CC2)C(=O)CN1c1ccc(Nc2nc(Nc3cc[nH]n3)cc(N3CC[NH2+]CC3)n2)cc1	delta_single	Serine/threonine-protein kinase Aurora-A,Homo sapiens										2.35714										1
InChI=1S/C24H28N2O2/c27-23-16-20(17-26(23)22-13-6-1-2-7-14-22)24(28)25-21-12-8-11-19(15-21)18-9-4-3-5-10-18/h3-5,8-12,15,20,22H,1-2,6-7,13-14,16-17H2,(H,25,28)	4858	1	O=C(Nc1cccc(-c2ccccc2)c1)C1CC(=O)N(C2CCCCCC2)C1	gamma_single	Enoyl-[acyl-carrier-protein] reductase,Mycobacterium tuberculosis										2.65789										1
InChI=1S/C24H28N2O3/c27-23(25-20-9-5-2-6-10-20)17-22-24(28)26(15-16-29-22)21-13-11-19(12-14-21)18-7-3-1-4-8-18/h2,5-6,9-14,18,22H,1,3-4,7-8,15-17H2,(H,25,27)	4859	1	O=C(CC1OCCN(c2ccc(C3CCCCC3)cc2)C1=O)Nc1ccccc1	delta_single	Coagulation factor IX,Homo sapiens										1.5										1
InChI=1S/C24H28N2O3S/c27-22(25-30(29)21-12-5-2-6-13-21)15-14-19-10-7-11-20-16-23(28)26(24(19)20)17-18-8-3-1-4-9-18/h1-6,8-9,12-13,19-20,24,30H,7,10-11,14-17H2	4860	1	O=C(CCC1CCCC2CC(=O)N(Cc3ccccc3)C12)N=[SH](=O)c1ccccc1	gamma_fused	Prostanoid EP3 receptor,Homo sapiens										1.05										1
InChI=1S/C24H28N4O3/c29-22(27-10-1-11-27)14-17-2-4-18(5-3-17)19-6-8-20(9-7-19)28-12-13-31-23-21(24(28)30)15-25-16-26-23/h6-9,15-18H,1-5,10-14H2	4861	1	O=C(CC1CCC(c2ccc(N3CCOc4ncncc4C3=O)cc2)CC1)N1CCC1	epsilon_fused	Diacylglycerol O-acyltransferase 1,Homo sapiens										1.17808										1
InChI=1S/C24H28N4O4/c29-23(19-7-12-31-13-8-19)27-9-5-18(6-10-27)17-1-3-20(4-2-17)28-11-14-32-22-21(24(28)30)15-25-16-26-22/h1-4,15-16,18-19H,5-14H2	4862	1	O=C(C1CCOCC1)N1CCC(c2ccc(N3CCOc4ncncc4C3=O)cc2)CC1	epsilon_fused	Diacylglycerol O-acyltransferase 1,Homo sapiens										1.17808										1
InChI=1S/C24H29N3O2/c28-23(19-11-5-2-6-12-19)26-21-15-16-27(24(21)29)22-14-8-7-13-20(22)25-17-18-9-3-1-4-10-18/h1-6,9-12,20-22,25H,7-8,13-17H2,(H,26,28)/p+1	4863	1	O=C(NC1CCN(C2CCCCC2[NH2+]Cc2ccccc2)C1=O)c1ccccc1	gamma_single	C-C chemokine receptor type 2,Homo sapiens										1.11765										1
InChI=1S/C24H29N3O2/c28-23(20-9-5-2-6-10-20)26-21(15-18-7-3-1-4-8-18)16-22-24(29)27(14-13-25-22)17-19-11-12-19/h1-10,19,21-22,25H,11-17H2,(H,26,28)/p+1	4864	1	O=C(NC(Cc1ccccc1)CC1[NH2+]CCN(CC2CC2)C1=O)c1ccccc1	delta_single	Beta-secretase 1,Homo sapiens										1.15254										1
InChI=1S/C24H29N3O2/c28-24-20(3-1-5-21-9-8-19-4-2-12-25-23(19)26-21)10-13-27(24)16-17-6-7-18-11-14-29-22(18)15-17/h6-9,15,20H,1-5,10-14,16H2,(H,25,26)	4865	1	O=C1C(CCCc2ccc3c(n2)NCCC3)CCN1Cc1ccc2c(c1)OCC2	gamma_single	Integrin alpha-V/beta-3,Homo sapiens										1.53846										1
InChI=1S/C24H30N2O2/c27-24-13-11-21-10-12-22(28-17-7-16-25-14-5-2-6-15-25)18-23(21)26(24)19-20-8-3-1-4-9-20/h1,3-4,8-10,12,18H,2,5-7,11,13-17,19H2/p+1	4868	1	O=C1CCc2ccc(OCCC[NH+]3CCCCC3)cc2N1Cc1ccccc1	delta_fused	Mus musculus,Mus musculus										1.96154										1
InChI=1S/C24H30N4O3/c29-22(17-28-12-6-10-24(28)30)27-20(13-18-7-2-1-3-8-18)14-19-15-21(16-26-19)31-23-9-4-5-11-25-23/h1-5,7-9,11,19-21,26H,6,10,12-17H2,(H,27,29)/p+1	4869	1	O=C(CN1CCCC1=O)NC(Cc1ccccc1)CC1CC(Oc2ccccn2)C[NH2+]1	gamma_single	Beta-secretase 1,Homo sapiens										1.15254										1
InChI=1S/C24H30N4O4S/c29-23(28-14-17-10-18(15-28)13-25-12-17)16-27-9-3-6-22(24(27)30)26-33(31,32)21-8-7-19-4-1-2-5-20(19)11-21/h1-2,4-5,7-8,11,17-18,22,25-26H,3,6,9-10,12-16H2/p+1	4871	1	O=C(CN1CCCC(NS(=O)(=O)c2ccc3ccccc3c2)C1=O)N1CC2C[NH2+]CC(C2)C1	delta_single	Coagulation factor X,Homo sapiens										1.67391										1
InChI=1S/C24H31N3O2S/c28-23-6-5-19-16-20(24(29)26-13-9-18-7-11-25-12-8-18)3-4-21(19)17-27(23)14-10-22-2-1-15-30-22/h1-4,15-16,18,25H,5-14,17H2,(H,26,29)/p+1	4872	1	O=C(NCCC1CC[NH2+]CC1)c1ccc2c(c1)CCC(=O)N(CCc1cccs1)C2	epsilon_fused	Homo sapiens,Homo sapiens										1.31944										1
InChI=1S/C24H32N6O4/c31-22(26-11-12-27-24(33)34-17-19-4-2-1-3-5-19)20-16-21-23(32)29(14-15-30(21)28-20)13-8-18-6-9-25-10-7-18/h1-5,16,18,25H,6-15,17H2,(H,26,31)(H,27,33)/p+1	4875	1	O=C(NCCNC(=O)c1cc2n(n1)CCN(CCC1CC[NH2+]CC1)C2=O)OCc1ccccc1	delta_fused	Homo sapiens,Homo sapiens										1.31944										1
InChI=1S/C24H33N7O3/c32-22(26-11-12-27-24(34)28-17-19-4-2-1-3-5-19)20-16-21-23(33)30(14-15-31(21)29-20)13-8-18-6-9-25-10-7-18/h1-5,16,18,25H,6-15,17H2,(H,26,32)(H2,27,28,34)/p+1	4877	1	O=C(NCCNC(=O)c1cc2n(n1)CCN(CCC1CC[NH2+]CC1)C2=O)NCc1ccccc1	delta_fused	Homo sapiens,Homo sapiens										1.31944										1
InChI=1S/C24H34N4O5/c29-22-20(16-19-6-4-9-25-17-19)18-28(22)23(30)26-10-12-27(13-11-26)24(31)33-15-5-14-32-21-7-2-1-3-8-21/h1-3,7-8,19-20,25H,4-6,9-18H2	4879	1	O=C(OCCCOc1ccccc1)N1CCN(C(=O)N2CC(CC3CCCNC3)C2=O)CC1	beta_single	Tryptase,Homo sapiens										1.07059										1
InChI=1S/C24H35N3O/c28-24-21-15-25-27(20-6-3-1-2-4-7-20)22(21)8-5-9-26(24)23-18-11-16-10-17(13-18)14-19(23)12-16/h15-20,23H,1-14H2	4880	1	O=C1c2cnn(C3CCCCCC3)c2CCCN1C1C2CC3CC(C2)CC1C3	epsilon_fused	11-beta-hydroxysteroid dehydrogenase 1,Homo sapiens										1.21212										1
InChI=1S/C24H35N3O2/c28-23-8-9-24(21-4-2-1-3-5-21,19-27(23)16-20-6-7-20)10-11-25-17-22(18-25)26-12-14-29-15-13-26/h1-5,20,22H,6-19H2/p+2	4881	1	O=C1CCC(CC[NH+]2CC([NH+]3CCOCC3)C2)(c2ccccc2)CN1CC1CC1	delta_single	Neurokinin 2 receptor,Homo sapiens										1.07143										1
InChI=1S/C24H35N3O2/c28-23-9-8-19-16-20(24(29)26-15-12-18-10-13-25-14-11-18)6-7-21(19)17-27(23)22-4-2-1-3-5-22/h6-7,16,18,22,25H,1-5,8-15,17H2,(H,26,29)/p+1	4882	1	O=C(NCCC1CC[NH2+]CC1)c1ccc2c(c1)CCC(=O)N(C1CCCCC1)C2	epsilon_fused	Homo sapiens,Homo sapiens										1.31944										1
InChI=1S/C24H36N4O/c29-23-8-9-24(21-4-2-1-3-5-21,19-28(23)16-20-6-7-20)10-13-26-17-22(18-26)27-14-11-25-12-15-27/h1-5,20,22,25H,6-19H2/p+2	4883	1	O=C1CCC(CC[NH+]2CC([NH+]3CCNCC3)C2)(c2ccccc2)CN1CC1CC1	delta_single	Neurokinin 2 receptor,Homo sapiens										1.07143										1
InChI=1S/C25H15N5O2S/c31-23-18-10-4-5-11-20(18)29(24(23)32)12-6-9-17-13-19-22(16-7-2-1-3-8-16)26-14-21-28-27-15-30(21)25(19)33-17/h1-5,7-8,10-11,13,15H,12,14H2	4884	1	O=C1C(=O)N(CC#Cc2cc3c(s2)-n2cnnc2CN=C3c2ccccc2)c2ccccc21	gamma_fused	Platelet activating factor receptor,Homo sapiens										1.06667										1
InChI=1S/C25H17N5OS/c31-23-13-18-9-4-5-11-21(18)29(23)12-6-10-19-14-20-24(17-7-2-1-3-8-17)26-15-22-28-27-16-30(22)25(20)32-19/h1-5,7-9,11,14,16H,12-13,15H2	4890	1	O=C1Cc2ccccc2N1CC#Cc1cc2c(s1)-n1cnnc1CN=C2c1ccccc1	gamma_fused	Platelet activating factor receptor,Homo sapiens										1.06667										1
InChI=1S/C25H18N4O3/c30-22-21-9-5-4-8-19(21)15-29(22)16-25(23(31)27-24(32)28-25)11-10-17-12-20(14-26-13-17)18-6-2-1-3-7-18/h1-9,12-14H,15-16H2,(H2,27,28,31,32)	4897	1	O=C1NC(=O)C(C#Cc2cncc(-c3ccccc3)c2)(CN2Cc3ccccc3C2=O)N1	gamma_fused	TNF-alpha,Homo sapiens										1.40099										1
InChI=1S/C25H19N5O5/c31-19-17-4-2-1-3-16(17)12-30(19)13-24(20(32)26-22(34)28-24)9-7-14-5-6-15-8-10-25(18(15)11-14)21(33)27-23(35)29-25/h1-6,11H,8,10,12-13H2,(H2,26,28,32,34)(H2,27,29,33,35)	4900	1	O=C1NC(=O)C(C#Cc2ccc3c(c2)C2(CC3)NC(=O)NC2=O)(CN2Cc3ccccc3C2=O)N1	gamma_fused	TNF-alpha,Homo sapiens										1.40099										1
InChI=1S/C25H19N5O5/c31-19-18-4-2-1-3-16(18)13-29(19)14-25(20(32)26-22(34)27-25)10-9-15-5-7-17(8-6-15)30-21(33)24(11-12-24)28-23(30)35/h1-8H,11-14H2,(H,28,35)(H2,26,27,32,34)	4902	1	O=C1NC(=O)C(C#Cc2ccc(N3C(=O)NC4(CC4)C3=O)cc2)(CN2Cc3ccccc3C2=O)N1	gamma_fused	TNF-alpha,Homo sapiens										1.40099										1
InChI=1S/C25H19NO/c27-25-23(19-11-3-1-4-12-19)24(26(25)20-14-5-2-6-15-20)22-17-9-13-18-10-7-8-16-21(18)22/h1-17,23-24H	4903	1	O=C1C(c2ccccc2)C(c2cccc3ccccc23)N1c1ccccc1	beta_single	MCF7,Homo sapiens										4.16514										1
InChI=1S/C25H20N2O/c28-25-23-14-24-21(12-20(15-26-24)11-18-7-3-1-4-8-18)13-22(23)17-27(25)16-19-9-5-2-6-10-19/h1-10,12-15H,11,16-17H2	4907	1	O=C1c2cc3ncc(Cc4ccccc4)cc3cc2CN1Cc1ccccc1	gamma_fused	Integrase,Human immunodeficiency virus 1										2.96078										1
InChI=1S/C25H21N5O2/c31-23-11-13-29(27-25(23)22-10-12-26-30(22)19-4-2-1-3-5-19)20-8-9-21-18(14-20)15-24(32)28(21)16-17-6-7-17/h1-5,8-14,17H,6-7,15-16H2	4915	1	O=C1Cc2cc(-n3ccc(=O)c(-c4ccnn4-c4ccccc4)n3)ccc2N1CC1CC1	gamma_fused	Phosphodiesterase 10A,Homo sapiens										1.16667										1
InChI=1S/C25H21N5O2/c31-23-12-14-28(27-25(23)22-11-13-26-30(22)19-5-2-1-3-6-19)20-9-10-21-17(15-20)16-24(32)29(21)18-7-4-8-18/h1-3,5-6,9-15,18H,4,7-8,16H2	4916	1	O=C1Cc2cc(-n3ccc(=O)c(-c4ccnn4-c4ccccc4)n3)ccc2N1C1CCC1	gamma_fused	Phosphodiesterase 10A,Homo sapiens										1.16667										1
InChI=1S/C25H21N5O2S/c31-24-20(29-22-7-9-26-14-28-22)12-16(13-27-24)15-3-1-4-17(11-15)30-10-8-19-18-5-2-6-21(18)33-23(19)25(30)32/h1,3-4,7,9,11-14H,2,5-6,8,10H2,(H,27,31)(H,26,28,29)	4917	1	O=C1c2sc3c(c2CCN1c1cccc(-c2c[nH]c(=O)c(Nc4ccncn4)c2)c1)CCC3	delta_fused	Tyrosine-protein kinase BTK,Homo sapiens										1.07317										1
InChI=1S/C25H22N6O2/c32-24-20(29-23-7-8-26-15-28-23)12-18(14-27-24)16-3-1-5-19(11-16)30-9-10-31-21-6-2-4-17(21)13-22(31)25(30)33/h1,3,5,7-8,11-15H,2,4,6,9-10H2,(H,27,32)(H,26,28,29)	4919	1	O=C1c2cc3c(n2CCN1c1cccc(-c2c[nH]c(=O)c(Nc4ccncn4)c2)c1)CCC3	delta_fused	Tyrosine-protein kinase BTK,Homo sapiens										1.07317										1
InChI=1S/C25H22N6O2/c32-24-23(29-19-12-27-28-13-19)30-22(14-26-24)18-2-1-3-20(11-18)31-9-8-17-10-16(15-4-5-15)6-7-21(17)25(31)33/h1-3,6-7,10-15H,4-5,8-9H2,(H,26,32)(H,27,28)(H,29,30)	4920	1	O=C1c2ccc(C3CC3)cc2CCN1c1cccc(-c2c[nH]c(=O)c(Nc3cn[nH]c3)n2)c1	delta_fused	Tyrosine-protein kinase BTK,Homo sapiens										1.07317										1
InChI=1S/C25H22N6O3S/c32-24-21-20(22(17-7-3-1-4-8-17)31(24)19-9-5-2-6-10-19)28-23(29-21)18-15-26-25(27-16-18)30-11-13-35(33,34)14-12-30/h1-10,15-16,22H,11-14H2,(H,28,29)	4922	1	O=C1c2nc(-c3cnc(N4CCS(=O)(=O)CC4)nc3)[nH]c2C(c2ccccc2)N1c1ccccc1	gamma_fused	p53-binding protein Mdm-2,Homo sapiens										1.24174										1
InChI=1S/C25H22N8O5/c34-18-17-4-2-1-3-16(17)13-33(18)14-25(20(36)29-23(38)31-25)6-5-15-11-26-21(27-12-15)32-9-7-24(8-10-32)19(35)28-22(37)30-24/h1-4,11-12H,7-10,13-14H2,(H2,28,30,35,37)(H2,29,31,36,38)	4923	1	O=C1NC(=O)C(C#Cc2cnc(N3CCC4(CC3)NC(=O)NC4=O)nc2)(CN2Cc3ccccc3C2=O)N1	gamma_fused	TNF-alpha,Homo sapiens										1.40099										1
InChI=1S/C25H23N3O2/c29-23(26-16-15-19-9-3-1-4-10-19)18-28-22-14-8-7-13-21(22)25(27-17-24(28)30)20-11-5-2-6-12-20/h1-14H,15-18H2,(H,26,29)	4927	1	O=C(CN1C(=O)CN=C(c2ccccc2)c2ccccc21)NCCc1ccccc1	epsilon_fused	Oxytocin receptor,Homo sapiens										2.66667										1
InChI=1S/C25H23N3O2S/c29-24(27-14-12-26-13-15-27)19-10-11-23-21(16-19)28(17-18-6-2-1-3-7-18)25(30)20-8-4-5-9-22(20)31-23/h1-11,16,26H,12-15,17H2/p+1	4928	1	O=C(c1ccc2c(c1)N(Cc1ccccc1)C(=O)c1ccccc1S2)N1CC[NH2+]CC1	epsilon_fused	Plasmodium falciparum,Plasmodium falciparum										2.32984										1
InChI=1S/C25H23N3O4/c29-21-13-20-25(31)28-12-11-22(18-9-5-2-6-10-18)32-23(28)16-27(20)15-19(21)24(30)26-14-17-7-3-1-4-8-17/h1-10,13,15,22-23H,11-12,14,16H2,(H,26,30)	4929	1	O=C(NCc1ccccc1)c1cn2c(cc1=O)C(=O)N1CCC(c3ccccc3)OC1C2	delta_fused	Human immunodeficiency virus,Human immunodeficiency virus										1.03448										1
InChI=1S/C25H23N5O4/c31-22-15-29(10-9-27-22)23(32)13-17-1-3-18(4-2-17)19-5-7-20(8-6-19)30-11-12-34-24-21(25(30)33)14-26-16-28-24/h1-8,14,16H,9-13,15H2,(H,27,31)	4935	1	O=C1CN(C(=O)Cc2ccc(-c3ccc(N4CCOc5ncncc5C4=O)cc3)cc2)CCN1	epsilon_fused	Diacylglycerol O-acyltransferase 1,Homo sapiens										1.17808										1
InChI=1S/C25H23N7O3/c33-22-18-4-2-1-3-17(18)14-32(22)15-25(23(34)27-24(35)28-25)8-7-16-5-6-19-20(13-16)29-30-21(19)31-11-9-26-10-12-31/h1-6,13,26H,9-12,14-15H2,(H,29,30)(H2,27,28,34,35)/p+1	4937	1	O=C1NC(=O)C(C#Cc2ccc3c(N4CC[NH2+]CC4)n[nH]c3c2)(CN2Cc3ccccc3C2=O)N1	gamma_fused	TNF-alpha,Homo sapiens										1.40099										1
InChI=1S/C25H23N7O3/c33-22-18-4-2-1-3-17(18)14-32(22)15-25(23(34)27-24(35)28-25)8-7-16-5-6-20-19(13-16)21(30-29-20)31-11-9-26-10-12-31/h1-6,13,26H,9-12,14-15H2,(H,29,30)(H2,27,28,34,35)/p+1	4938	1	O=C1NC(=O)C(C#Cc2ccc3[nH]nc(N4CC[NH2+]CC4)c3c2)(CN2Cc3ccccc3C2=O)N1	gamma_fused	TNF-alpha,Homo sapiens										1.40099										1
InChI=1S/C25H24N2O2/c28-24-14-13-20-17-21(25(29)26-23-9-5-2-6-10-23)11-12-22(20)18-27(24)16-15-19-7-3-1-4-8-19/h1-12,17H,13-16,18H2,(H,26,29)	4943	1	O=C(Nc1ccccc1)c1ccc2c(c1)CCC(=O)N(CCc1ccccc1)C2	epsilon_fused	Homo sapiens,Homo sapiens										1.31944										1
InChI=1S/C25H24N4O2/c30-23-25(14-17-28(18-15-25)24(31)27-20-11-5-2-6-12-20)22(19-9-3-1-4-10-19)29(23)21-13-7-8-16-26-21/h1-13,16,22H,14-15,17-18H2,(H,27,31)	4950	1	O=C(Nc1ccccc1)N1CCC2(CC1)C(=O)N(c1ccccn1)C2c1ccccc1	beta_spiro	Vanilloid receptor,Homo sapiens										2.45455										1
InChI=1S/C25H24N4O2/c30-23-25(14-17-28(18-15-25)24(31)27-21-13-7-8-16-26-21)22(19-9-3-1-4-10-19)29(23)20-11-5-2-6-12-20/h1-13,16,22H,14-15,17-18H2,(H,26,27,31)	4951	1	O=C(Nc1ccccn1)N1CCC2(CC1)C(=O)N(c1ccccc1)C2c1ccccc1	beta_spiro	Vanilloid receptor,Homo sapiens										2.45455										1
InChI=1S/C25H24N4O3/c30-23(28-11-1-2-12-28)15-18-3-5-19(6-4-18)20-7-9-21(10-8-20)29-13-14-32-24-22(25(29)31)16-26-17-27-24/h3-10,16-17H,1-2,11-15H2	4952	1	O=C(Cc1ccc(-c2ccc(N3CCOc4ncncc4C3=O)cc2)cc1)N1CCCC1	epsilon_fused	Diacylglycerol O-acyltransferase 1,Homo sapiens										1.17808										1
InChI=1S/C25H24N4O3/c30-24(20-4-2-1-3-5-20)28-12-10-19(11-13-28)18-6-8-21(9-7-18)29-14-15-32-23-22(25(29)31)16-26-17-27-23/h1-9,16-17,19H,10-15H2	4953	1	O=C(c1ccccc1)N1CCC(c2ccc(N3CCOc4ncncc4C3=O)cc2)CC1	epsilon_fused	Diacylglycerol O-acyltransferase 1,Homo sapiens										1.17808										1
InChI=1S/C25H24N4O3S/c30-22-21-4-2-1-3-20(21)16-29(22)17-25(23(31)26-24(32)27-25)10-9-18-5-7-19(8-6-18)15-28-11-13-33-14-12-28/h1-8H,11-17H2,(H2,26,27,31,32)/p+1	4954	1	O=C1NC(=O)C(C#Cc2ccc(C[NH+]3CCSCC3)cc2)(CN2Cc3ccccc3C2=O)N1	gamma_fused	TNF-alpha,Homo sapiens										1.40099										1
InChI=1S/C25H24N4O4/c30-22-21-4-2-1-3-20(21)16-29(22)17-25(23(31)26-24(32)27-25)10-9-18-5-7-19(8-6-18)15-28-11-13-33-14-12-28/h1-8H,11-17H2,(H2,26,27,31,32)/p+1	4955	1	O=C1NC(=O)C(C#Cc2ccc(C[NH+]3CCOCC3)cc2)(CN2Cc3ccccc3C2=O)N1	gamma_fused	TNF-alpha,Homo sapiens										1.40099										1
InChI=1S/C25H24N4O4/c30-22-21-7-2-1-6-20(21)16-29(22)17-25(23(31)26-24(32)27-25)9-8-18-4-3-5-19(14-18)15-28-10-12-33-13-11-28/h1-7,14H,10-13,15-17H2,(H2,26,27,31,32)/p+1	4956	1	O=C1NC(=O)C(C#Cc2cccc(C[NH+]3CCOCC3)c2)(CN2Cc3ccccc3C2=O)N1	gamma_fused	TNF-alpha,Homo sapiens										1.40099										1
InChI=1S/C25H24N6O/c32-24-25(9-15-29(16-10-25)18-22-26-11-12-27-22)20-5-1-2-6-21(20)31(24)19-7-8-23(28-17-19)30-13-3-4-14-30/h1-8,11-14,17H,9-10,15-16,18H2,(H,26,27)/p+1	4959	1	O=C1N(c2ccc(-n3cccc3)nc2)c2ccccc2C12CC[NH+](Cc1ncc[nH]1)CC2	gamma_fused	Egl nine homolog 1,Homo sapiens										1.92										1
InChI=1S/C25H24N6O2/c32-24-15-27-20-8-7-18(12-19(20)16-31(24)11-9-17-4-3-10-26-13-17)25(33)28-14-23-29-21-5-1-2-6-22(21)30-23/h1-8,10,12-13,27H,9,11,14-16H2,(H,28,33)(H,29,30)	4960	1	O=C(NCc1nc2ccccc2[nH]1)c1ccc2c(c1)CN(CCc1cccnc1)C(=O)CN2	epsilon_fused	Integrin alpha-V/beta-3,Homo sapiens										1.53846										1
InChI=1S/C25H25N3O2/c29-22-15-27(17-10-4-5-11-17)25(30)21-14-19-18-12-6-7-13-20(18)26-23(19)24(28(21)22)16-8-2-1-3-9-16/h1-3,6-9,12-13,17,21,24,26H,4-5,10-11,14-15H2	4962	1	O=C1C2Cc3c([nH]c4ccccc34)C(c3ccccc3)N2C(=O)CN1C1CCCC1	delta_fused	Phosphodiesterase 5A,Bos taurus										1.25										1
InChI=1S/C25H25N3O4S/c29-23-13-7-15-27(23)16-8-14-26-24(30)22-17-21(33(32)20-11-5-2-6-12-20)18-28(25(22)31)19-9-3-1-4-10-19/h1-6,9-12,17-18H,7-8,13-16H2,(H,26,30)	4964	1	O=C(NCCCN1CCCC1=O)c1cc(S(=O)c2ccccc2)cn(-c2ccccc2)c1=O	gamma_single	Leukocyte elastase,Homo sapiens										3.10577										1
InChI=1S/C25H25N5O2/c26-24-20-3-1-2-4-21(20)30(25(24)32)16-27-11-13-28(14-12-27)18-7-8-19-22(15-18)29(17-5-6-17)10-9-23(19)31/h1-4,7-10,15,17,26H,5-6,11-14,16H2/p+1	4965	1	N=C1C(=O)N(C[NH+]2CCN(c3ccc4c(=O)ccn(C5CC5)c4c3)CC2)c2ccccc21	gamma_fused	Isocitrate lyase,Mycobacterium tuberculosis										8										1
InChI=1S/C25H25N5O3/c31-22-21-4-2-1-3-19(21)15-30(22)16-25(23(32)28-24(33)29-25)10-7-18-5-6-20(27-14-18)13-17-8-11-26-12-9-17/h1-6,14,17,26H,8-9,11-13,15-16H2,(H2,28,29,32,33)/p+1	4966	1	O=C1NC(=O)C(C#Cc2ccc(CC3CC[NH2+]CC3)nc2)(CN2Cc3ccccc3C2=O)N1	gamma_fused	TNF-alpha,Homo sapiens										1.40099										1
InChI=1S/C25H25N5O3/c31-22-21-7-2-1-6-20(21)16-30(22)17-25(23(32)27-24(33)28-25)9-8-18-4-3-5-19(14-18)15-29-12-10-26-11-13-29/h1-7,14,26H,10-13,15-17H2,(H2,27,28,32,33)/p+2	4967	1	O=C1NC(=O)C(C#Cc2cccc(C[NH+]3CC[NH2+]CC3)c2)(CN2Cc3ccccc3C2=O)N1	gamma_fused	TNF-alpha,Homo sapiens										1.40099										1
InChI=1S/C25H25N5O3/c31-22-21-7-3-2-6-19(21)15-30(22)17-25(23(32)27-24(33)28-25)11-10-18-8-9-20(26-14-18)16-29-12-4-1-5-13-29/h2-3,6-9,14H,1,4-5,12-13,15-17H2,(H2,27,28,32,33)/p+1	4968	1	O=C1NC(=O)C(C#Cc2ccc(C[NH+]3CCCCC3)nc2)(CN2Cc3ccccc3C2=O)N1	gamma_fused	TNF-alpha,Homo sapiens										1.40099										1
InChI=1S/C25H26N2O2/c28-24-14-19(16-27(24)20-9-3-4-10-20)25(29)26-15-23-21-11-5-1-7-17(21)13-18-8-2-6-12-22(18)23/h1-2,5-8,11-13,19-20H,3-4,9-10,14-16H2,(H,26,29)	4972	1	O=C(NCc1c2ccccc2cc2ccccc12)C1CC(=O)N(C2CCCC2)C1	gamma_single	Enoyl-[acyl-carrier-protein] reductase,Mycobacterium tuberculosis										2.65789										1
InChI=1S/C25H26N4O3S2/c30-23-16-28(34(31,32)22-6-5-19-3-1-2-4-20(19)15-22)17-24-29(23)18-25(33-24)9-13-27(14-10-25)21-7-11-26-12-8-21/h1-8,11-12,15,24H,9-10,13-14,16-18H2/p+1	4976	1	O=C1CN(S(=O)(=O)c2ccc3ccccc3c2)CC2SC3(CCN(c4cc[nH+]cc4)CC3)CN12	delta_fused	Coagulation factor X,Homo sapiens										1.67391										1
InChI=1S/C25H26N4O4S/c30-24-25(9-10-25)19-11-18-21(33-27-23(18)28-34(31)17-6-7-17)12-20(19)29(24)16-5-8-22(26-13-16)32-14-15-3-1-2-4-15/h5,8,11-13,15,17,34H,1-4,6-7,9-10,14H2	4977	1	O=C1N(c2ccc(OCC3CCCC3)nc2)c2cc3onc(N=[SH](=O)C4CC4)c3cc2C12CC2	gamma_fused	Sodium channel protein type IX alpha subunit,Homo sapiens										1.66234										1
InChI=1S/C25H26N5O/c1-18-15-25(13-5-2-6-14-25)16-23(31)30(18)17-19-9-11-20(12-10-19)21-7-3-4-8-22(21)24-26-28-29-27-24/h3-4,7-12H,1-2,5-6,13-17H2/q-1	4979	1	C=C1CC2(CCCCC2)CC(=O)N1Cc1ccc(-c2ccccc2-c2nn[n-]n2)cc1	delta_spiro	Angiotensin II type 1a (AT-1a) receptor,Bos taurus										1.15										1
InChI=1S/C25H26N5O/c1-18-25(14-6-2-3-7-15-25)16-23(31)30(18)17-19-10-12-20(13-11-19)21-8-4-5-9-22(21)24-26-28-29-27-24/h4-5,8-13H,1-3,6-7,14-17H2/q-1	4980	1	C=C1N(Cc2ccc(-c3ccccc3-c3nn[n-]n3)cc2)C(=O)CC12CCCCCC2	gamma_spiro	Angiotensin II type 1a (AT-1a) receptor,Bos taurus										1.15										1
InChI=1S/C25H26N8O2/c34-23-2-1-9-33(23)18-6-10-32(11-7-18)24(35)21-13-16-12-17(3-4-19(16)30-21)29-25-27-8-5-20(31-25)22-14-26-15-28-22/h3-5,8,12-15,18,30H,1-2,6-7,9-11H2,(H,26,28)(H,27,29,31)	4982	1	O=C(c1cc2cc(Nc3nccc(-c4c[nH]cn4)n3)ccc2[nH]1)N1CCC(N2CCCC2=O)CC1	gamma_single	Tyrosine-protein kinase SYK,Homo sapiens										1.1										1
InChI=1S/C25H27N3O3S/c29-25-20(24-26-21-13-8-9-15-23(21)32(30,31)27-24)16-19-12-6-1-2-7-14-22(19)28(25)17-18-10-4-3-5-11-18/h3-5,8-11,13,15-16,19,22H,1-2,6-7,12,14,17H2,(H,26,27)	4984	1	O=C1C(C2=NS(=O)(=O)c3ccccc3N2)=CC2CCCCCCC2N1Cc1ccccc1	delta_fused	Hepatitis C virus,Hepatitis C virus										1.17526										1
InChI=1S/C25H27N3O6/c29-20(23(31)26-16-19-10-5-2-6-11-19)17-27-25(33)34-21-14-15-28(24(21)32)22(30)13-7-12-18-8-3-1-4-9-18/h1-6,8-11,21H,7,12-17H2,(H,26,31)(H,27,33)	4987	1	O=C(NCC(=O)C(=O)NCc1ccccc1)OC1CCN(C(=O)CCCc2ccccc2)C1=O	gamma_single	Cathepsin K,Homo sapiens										1.20588										1
InChI=1S/C25H27N5O2/c31-23-22-11-19(15-29(22)9-4-10-30(23)14-18-5-2-1-3-6-18)21-7-8-26-24(28-21)27-20-12-25(13-20)16-32-17-25/h1-3,5-8,11,15,20H,4,9-10,12-14,16-17H2,(H,26,27,28)	4988	1	O=C1c2cc(-c3ccnc(NC4CC5(COC5)C4)n3)cn2CCCN1Cc1ccccc1	epsilon_fused	MAP kinase ERK2,Homo sapiens										1.71429										1
InChI=1S/C25H27N5O4/c31-22(26-11-10-17-6-2-1-3-7-17)14-28-23(32)15-30-16-24(33)29-21(25(30)34)12-18-13-27-20-9-5-4-8-19(18)20/h1-9,13,21,27H,10-12,14-16H2,(H,26,31)(H,28,32)(H,29,33)	4990	1	O=C(CNC(=O)CN1CC(=O)NC(Cc2c[nH]c3ccccc23)C1=O)NCCc1ccccc1	delta_single	Cholecystokinin B receptor,Rattus norvegicus										1.64706										1
InChI=1S/C25H27N5O5/c26-23-20-5-4-18(12-17(20)15-27-23)28-22(31)14-21-25(33)30(8-11-35-21)19-3-1-2-16(13-19)24(32)29-6-9-34-10-7-29/h1-5,12-13,21H,6-11,14-15H2,(H2,26,27)(H,28,31)/p+1	4991	1	[NH2+]=C1NCc2cc(NC(=O)CC3OCCN(c4cccc(C(=O)N5CCOCC5)c4)C3=O)ccc21	delta_single	Coagulation factor IX,Homo sapiens										1.5										1
InChI=1S/C25H28N2O2/c28-24(20-7-8-20)19-5-3-18(4-6-19)21-9-10-23-22(17-21)11-14-27(25(23)29)16-15-26-12-1-2-13-26/h3-6,9-10,17,20H,1-2,7-8,11-16H2/p+1	4994	1	O=C(c1ccc(-c2ccc3c(c2)CCN(CC[NH+]2CCCC2)C3=O)cc1)C1CC1	delta_fused	HERG,Homo sapiens										7.80952										1
InChI=1S/C25H28N4O3S2/c26-25(27-12-4-1-5-13-27)20-10-8-19(9-11-20)17-28-14-15-29(18-23(28)30)34(31,32)24-16-21-6-2-3-7-22(21)33-24/h2-3,6-11,16,26H,1,4-5,12-15,17-18H2/p+1	4996	1	[NH2+]=C(c1ccc(CN2CCN(S(=O)(=O)c3cc4ccccc4s3)CC2=O)cc1)N1CCCCC1	delta_single	Coagulation factor X,Homo sapiens										1.67391										1
InChI=1S/C25H28N4O5S/c30-22-7-3-6-18-21(34-20-10-13-26-17-5-2-1-4-16(17)20)14-19(29(18)22)23(31)27-25(11-12-25)24(32)28-35(33)15-8-9-15/h1-2,4-5,10,13,15,18-19,21,35H,3,6-9,11-12,14H2,(H,27,31)	4997	1	O=C(NC1(C(=O)N=[SH](=O)C2CC2)CC1)C1CC(Oc2ccnc3ccccc23)C2CCCC(=O)N12	delta_fused	Hepatitis C virus,Hepatitis C virus										1.17526										1
InChI=1S/C25H29N5O3S/c26-25(28-12-4-1-5-13-28)20-10-8-19(9-11-20)17-29-14-15-30(18-24(29)31)34(32,33)23-16-21-6-2-3-7-22(21)27-23/h2-3,6-11,16,26-27H,1,4-5,12-15,17-18H2/p+1	5005	1	[NH2+]=C(c1ccc(CN2CCN(S(=O)(=O)c3cc4ccccc4[nH]3)CC2=O)cc1)N1CCCCC1	delta_single	Coagulation factor X,Homo sapiens										1.67391										1
InChI=1S/C25H29N5O4/c31-22-15-29(10-9-27-22)23(32)13-17-1-3-18(4-2-17)19-5-7-20(8-6-19)30-11-12-34-24-21(25(30)33)14-26-16-28-24/h5-8,14,16-18H,1-4,9-13,15H2,(H,27,31)	5006	1	O=C1CN(C(=O)CC2CCC(c3ccc(N4CCOc5ncncc5C4=O)cc3)CC2)CCN1	epsilon_fused	Diacylglycerol O-acyltransferase 1,Homo sapiens										1.17808										1
InChI=1S/C25H30N2O2/c28-24-17-21(18-27(24)23-14-7-2-1-3-8-15-23)25(29)26-22-13-9-12-20(16-22)19-10-5-4-6-11-19/h4-6,9-13,16,21,23H,1-3,7-8,14-15,17-18H2,(H,26,29)	5009	1	O=C(Nc1cccc(-c2ccccc2)c1)C1CC(=O)N(C2CCCCCCC2)C1	gamma_single	Enoyl-[acyl-carrier-protein] reductase,Mycobacterium tuberculosis										2.65789										1
InChI=1S/C25H30N2O4S/c28-24(19-10-3-1-4-11-19)26-22-15-9-17-27(25(22)29)23-16-8-7-12-20(23)18-32(30,31)21-13-5-2-6-14-21/h1-6,10-11,13-14,20,22-23H,7-9,12,15-18H2,(H,26,28)	5010	1	O=C(NC1CCCN(C2CCCCC2CS(=O)(=O)c2ccccc2)C1=O)c1ccccc1	delta_single	C-C chemokine receptor type 2,Homo sapiens										1.11765										1
InChI=1S/C25H30N4O4/c30-23(28-9-12-32-13-10-28)15-18-1-3-19(4-2-18)20-5-7-21(8-6-20)29-11-14-33-24-22(25(29)31)16-26-17-27-24/h5-8,16-19H,1-4,9-15H2	5012	1	O=C(CC1CCC(c2ccc(N3CCOc4ncncc4C3=O)cc2)CC1)N1CCOCC1	epsilon_fused	Diacylglycerol O-acyltransferase 1,Homo sapiens										1.17808										1
InChI=1S/C25H31N3O2/c29-24-9-8-21-16-22(25(30)27-15-12-19-10-13-26-14-11-19)6-7-23(21)18-28(24)17-20-4-2-1-3-5-20/h1-7,16,19,26H,8-15,17-18H2,(H,27,30)/p+1	5015	1	O=C(NCCC1CC[NH2+]CC1)c1ccc2c(c1)CCC(=O)N(Cc1ccccc1)C2	epsilon_fused	Homo sapiens,Homo sapiens										1.31944										1
InChI=1S/C25H31N5O3/c31-23(20-15-27-25(33)28-16-20)29-21(13-18-7-3-1-4-8-18)14-22-24(32)30(12-11-26-22)17-19-9-5-2-6-10-19/h1-10,20-22,26H,11-17H2,(H,29,31)(H2,27,28,33)/p+1	5018	1	O=C1NCC(C(=O)NC(Cc2ccccc2)CC2[NH2+]CCN(Cc3ccccc3)C2=O)CN1	delta_single	Beta-secretase 1,Homo sapiens										1.15254										1
InChI=1S/C25H32N4O4S/c30-24(27-13-14-28-34(32,33)18-20-4-2-1-3-5-20)21-6-7-22-17-29(25(31)23(22)16-21)15-10-19-8-11-26-12-9-19/h1-7,16,19,26,28H,8-15,17-18H2,(H,27,30)/p+1	5021	1	O=C(NCCNS(=O)(=O)Cc1ccccc1)c1ccc2c(c1)C(=O)N(CCC1CC[NH2+]CC1)C2	gamma_fused	Homo sapiens,Homo sapiens										1.31944										1
InChI=1S/C25H32N4O4S/c30-24-18-33-25(19-29(24)22-7-8-22)9-11-27(12-10-25)34(31,32)28-15-13-26(14-16-28)23-6-5-20-3-1-2-4-21(20)17-23/h1-6,17,22H,7-16,18-19H2	5022	1	O=C1COC2(CCN(S(=O)(=O)N3CCN(c4ccc5ccccc5c4)CC3)CC2)CN1C1CC1	delta_spiro	Fatty acid synthase,Homo sapiens										15										1
InChI=1S/C25H33N3O3/c29-22-15-20(23-19-10-5-4-9-18(19)12-14-28(22)23)25(31)27-13-6-11-21(27)24(30)26-16-17-7-2-1-3-8-17/h4-5,9-10,17,20-21,23H,1-3,6-8,11-16H2,(H,26,30)	5023	1	O=C(NCC1CCCCC1)C1CCCN1C(=O)C1CC(=O)N2CCc3ccccc3C12	gamma_fused	Thrombin,Homo sapiens										2.47826										1
InChI=1S/C25H33N5O3S/c31-23(27-12-13-28-25(33)29-17-19-4-2-1-3-5-19)22-16-20-21(34-22)9-15-30(24(20)32)14-8-18-6-10-26-11-7-18/h1-5,16,18,26H,6-15,17H2,(H,27,31)(H2,28,29,33)/p+1	5025	1	O=C(NCCNC(=O)c1cc2c(s1)CCN(CCC1CC[NH2+]CC1)C2=O)NCc1ccccc1	delta_fused	Homo sapiens,Homo sapiens										1.31944										1
InChI=1S/C25H34N4O/c30-24-12-6-16-28(24)21-13-18-27(19-14-21)15-7-17-29-23-11-5-4-10-22(23)25(26-29)20-8-2-1-3-9-20/h1-3,8-9,21H,4-7,10-19H2/p+1	5026	1	O=C1CCCN1C1CC[NH+](CCCn2nc(-c3ccccc3)c3c2CCCC3)CC1	gamma_single	Cathepsin S,Homo sapiens										1.27119										1
InChI=1S/C25H37N3O/c29-24-11-12-25(22-7-3-1-4-8-22,20-28(24)17-21-9-10-21)13-16-26-18-23(19-26)27-14-5-2-6-15-27/h1,3-4,7-8,21,23H,2,5-6,9-20H2/p+2	5028	1	O=C1CCC(CC[NH+]2CC([NH+]3CCCCC3)C2)(c2ccccc2)CN1CC1CC1	delta_single	Neurokinin 2 receptor,Homo sapiens										1.07143										1
InChI=1S/C25H37N5O3/c31-23(10-3-1-2-8-22-9-4-5-12-27-22)28-13-15-29(16-14-28)25(33)30-19-21(24(30)32)17-20-7-6-11-26-18-20/h4-5,9,12,20-21,26H,1-3,6-8,10-11,13-19H2	5029	1	O=C(CCCCCc1ccccn1)N1CCN(C(=O)N2CC(CC3CCCNC3)C2=O)CC1	beta_single	Tryptase,Homo sapiens										1.07059										1
InChI=1S/C26H19N3O3/c30-23-22-9-5-4-8-21(22)16-29(23)17-26(24(31)27-25(32)28-26)15-14-18-10-12-20(13-11-18)19-6-2-1-3-7-19/h1-13H,16-17H2,(H2,27,28,31,32)	5039	1	O=C1NC(=O)C(C#Cc2ccc(-c3ccccc3)cc2)(CN2Cc3ccccc3C2=O)N1	gamma_fused	TNF-alpha,Homo sapiens										1.40099										1
InChI=1S/C26H19N5O/c32-26-23-22(24(17-8-3-1-4-9-17)31(26)20-12-5-2-6-13-20)29-25(30-23)19-11-7-10-18(14-19)21-15-27-16-28-21/h1-16,24H,(H,27,28)(H,29,30)	5040	1	O=C1c2nc(-c3cccc(-c4c[nH]cn4)c3)[nH]c2C(c2ccccc2)N1c1ccccc1	gamma_fused	p53-binding protein Mdm-2,Homo sapiens										1.24174										1
InChI=1S/C26H19N5O2S/c32-19-7-3-6-18(13-19)25-21-14-20(34-26(21)31-16-28-29-23(31)15-27-25)8-4-12-30-22-9-2-1-5-17(22)10-11-24(30)33/h1-3,5-6,9,13-14,16H,7,10-12,15H2	5041	1	O=C1C=C(C2=NCc3nncn3-c3sc(C#CCN4C(=O)CCc5ccccc54)cc32)C=CC1	delta_fused	Platelet activating factor receptor,Homo sapiens										1.06667										1
InChI=1S/C26H20N2O3/c29-25-14-19(20-5-3-7-24-26(20)21-4-1-2-6-23(21)30-24)16-28(25)15-17-8-10-18(11-9-17)22-12-13-27-31-22/h1-13,19H,14-16H2	5046	1	O=C1CC(c2cccc3oc4ccccc4c23)CN1Cc1ccc(-c2ccno2)cc1	gamma_single	Phosphodiesterase 10A,Homo sapiens										1.16667										1
InChI=1S/C26H21N3O3/c30-24-15-14-22-17-29(23-9-5-4-8-20(23)16-28(22)24)26(32)19-10-12-21(13-11-19)27-25(31)18-6-2-1-3-7-18/h1-14H,15-17H2,(H,27,31)	5051	1	O=C(Nc1ccc(C(=O)N2CC3=CCC(=O)N3Cc3ccccc32)cc1)c1ccccc1	gamma_fused	Rattus norvegicus,Rattus norvegicus										2.39726										1
InChI=1S/C26H21N5O5/c32-20-18-6-2-1-4-17(18)13-31(20)14-25(21(33)27-23(35)29-25)11-9-15-7-8-19-16(12-15)5-3-10-26(19)22(34)28-24(36)30-26/h1-2,4,6-8,12H,3,5,10,13-14H2,(H2,27,29,33,35)(H2,28,30,34,36)	5052	1	O=C1NC(=O)C(C#Cc2ccc3c(c2)CCCC32NC(=O)NC2=O)(CN2Cc3ccccc3C2=O)N1	gamma_fused	TNF-alpha,Homo sapiens										1.40099										1
InChI=1S/C26H22N4O4/c31-24(19-5-2-1-3-6-19)20-7-4-8-21(17-20)34-16-15-28-13-14-30-23(25(28)32)10-9-22(26(30)33)29-12-11-27-18-29/h1-12,17-18H,13-16H2	5055	1	O=C(c1ccccc1)c1cccc(OCCN2CCn3c(ccc(-n4ccnc4)c3=O)C2=O)c1	delta_fused	Gamma-secretase,Homo sapiens										1.34146										1
InChI=1S/C26H23N3O2/c30-23-11-6-16-29(23)17-18-12-14-20(15-13-18)27-25(19-7-2-1-3-8-19)24-21-9-4-5-10-22(21)28-26(24)31/h1-5,7-10,12-15,27H,6,11,16-17H2,(H,28,31)/b25-24-	5057	1	O=C1Nc2ccccc2/C1=C(/Nc1ccc(CN2CCCC2=O)cc1)c1ccccc1	gamma_single	Vascular endothelial growth factor receptor 2,Homo sapiens										1.5										1
InChI=1S/C26H23N3O2/c30-25(23-16-20-11-4-6-12-21(20)27-23)28-22-15-14-19-10-5-7-13-24(19)29(26(22)31)17-18-8-2-1-3-9-18/h1-13,16,22,27H,14-15,17H2,(H,28,30)	5059	1	O=C(NC1CCc2ccccc2N(Cc2ccccc2)C1=O)c1cc2ccccc2[nH]1	epsilon_fused	Cholecystokinin receptor,Rattus norvegicus										1.5										1
InChI=1S/C26H23N3O3/c30-21-15-26(12-7-13-26)14-20-23(21)22(25(32)28(20)17-8-3-1-4-9-17)19-16-27-29(24(19)31)18-10-5-2-6-11-18/h1-6,8-11,16,22,27H,7,12-15H2	5062	1	O=C1CC2(CCC2)CC2=C1C(c1c[nH]n(-c3ccccc3)c1=O)C(=O)N2c1ccccc1	gamma_fused	Elongation of very long chain fatty acids protein 6,Homo sapiens										1.36										1
InChI=1S/C26H23N3O3S/c30-26-22(25-27-23-13-7-8-14-24(23)33(31,32)28-25)16-21(15-19-9-3-1-4-10-19)18-29(26)17-20-11-5-2-6-12-20/h1-14,16,21H,15,17-18H2,(H,27,28)	5063	1	O=C1C(C2=NS(=O)(=O)c3ccccc3N2)=CC(Cc2ccccc2)CN1Cc1ccccc1	delta_single	Hepatitis C virus,Hepatitis C virus										1.17526										1
InChI=1S/C26H23N3O6/c30-21(23(31)27-15-17-6-2-1-3-7-17)16-28-26(34)35-22-12-13-29(25(22)33)24(32)20-11-10-18-8-4-5-9-19(18)14-20/h1-11,14,22H,12-13,15-16H2,(H,27,31)(H,28,34)	5064	1	O=C(NCC(=O)C(=O)NCc1ccccc1)OC1CCN(C(=O)c2ccc3ccccc3c2)C1=O	gamma_single	Cathepsin K,Homo sapiens										1.20588										1
InChI=1S/C26H23N3O7/c30-21(23(31)27-15-17-6-2-1-3-7-17)16-28-25(33)36-22-12-13-29(24(22)32)26(34)35-20-11-10-18-8-4-5-9-19(18)14-20/h1-11,14,22H,12-13,15-16H2,(H,27,31)(H,28,33)	5065	1	O=C(NCC(=O)C(=O)NCc1ccccc1)OC1CCN(C(=O)Oc2ccc3ccccc3c2)C1=O	gamma_single	Cathepsin K,Homo sapiens										1.20588										1
InChI=1S/C26H23N5O2S/c32-25-21(30-23-8-10-27-15-29-23)13-17(14-28-25)16-4-3-5-18(12-16)31-11-9-20-19-6-1-2-7-22(19)34-24(20)26(31)33/h3-5,8,10,12-15H,1-2,6-7,9,11H2,(H,28,32)(H,27,29,30)	5069	1	O=C1c2sc3c(c2CCN1c1cccc(-c2c[nH]c(=O)c(Nc4ccncn4)c2)c1)CCCC3	delta_fused	Tyrosine-protein kinase BTK,Homo sapiens										1.07317										1
InChI=1S/C26H23N5O4/c32-22-11-21(26(34)35-15-17-7-3-1-4-8-17)31(22)24(18-9-5-2-6-10-18)25(33)29-14-20-23-19(13-28-20)12-27-16-30-23/h1-10,12-13,16,20-21,24H,11,14-15H2,(H,29,33)	5070	1	O=C(OCc1ccccc1)C1CC(=O)N1C(C(=O)NCC1N=Cc2cncnc21)c1ccccc1	beta_single	Human immunodeficiency virus type 1 protease,Human immunodeficiency virus 1										1.04878										1
InChI=1S/C26H23N7O5/c34-20-18-4-2-1-3-17(18)14-33(20)15-26(22(36)29-24(38)31-26)8-7-16-5-6-19(27-13-16)32-11-9-25(10-12-32)21(35)28-23(37)30-25/h1-6,13H,9-12,14-15H2,(H2,28,30,35,37)(H2,29,31,36,38)	5071	1	O=C1NC(=O)C(C#Cc2ccc(N3CCC4(CC3)NC(=O)NC4=O)nc2)(CN2Cc3ccccc3C2=O)N1	gamma_fused	TNF-alpha,Homo sapiens										1.40099										1
InChI=1S/C26H24N2O4/c29-23-16-22(26(31)32-18-20-12-6-2-7-13-20)28(23)24(21-14-8-3-9-15-21)25(30)27-17-19-10-4-1-5-11-19/h1-15,22,24H,16-18H2,(H,27,30)	5074	1	O=C(OCc1ccccc1)C1CC(=O)N1C(C(=O)NCc1ccccc1)c1ccccc1	beta_single	Human immunodeficiency virus type 1 protease,Human immunodeficiency virus 1										1.04878										1
InChI=1S/C26H24N4O/c31-25-26(11-15-29(16-12-26)18-24-27-13-14-28-24)22-7-3-4-8-23(22)30(25)21-10-9-19-5-1-2-6-20(19)17-21/h1-10,13-14,17H,11-12,15-16,18H2,(H,27,28)/p+1	5076	1	O=C1N(c2ccc3ccccc3c2)c2ccccc2C12CC[NH+](Cc1ncc[nH]1)CC2	gamma_fused	Egl nine homolog 1,Homo sapiens										1.92										1
InChI=1S/C26H24N4O4/c31-21-10-13-29(14-11-21)15-19-7-5-18(6-8-19)9-12-26(24(33)27-25(34)28-26)17-30-16-20-3-1-2-4-22(20)23(30)32/h1-8H,10-11,13-17H2,(H2,27,28,33,34)/p+1	5078	1	O=C1CC[NH+](Cc2ccc(C#CC3(CN4Cc5ccccc5C4=O)NC(=O)NC3=O)cc2)CC1	gamma_fused	TNF-alpha,Homo sapiens										1.40099										1
InChI=1S/C26H24N6O/c33-25-22-21(23(18-10-4-1-5-11-18)32(25)20-12-6-2-7-13-20)29-24(30-22)19-16-27-26(28-17-19)31-14-8-3-9-15-31/h1-2,4-7,10-13,16-17,23H,3,8-9,14-15H2,(H,29,30)	5080	1	O=C1c2nc(-c3cnc(N4CCCCC4)nc3)[nH]c2C(c2ccccc2)N1c1ccccc1	gamma_fused	p53-binding protein Mdm-2,Homo sapiens										1.24174										1
InChI=1S/C26H24N6O2/c33-25-21(30-24-8-9-27-16-29-24)13-19(15-28-25)17-5-3-6-20(12-17)31-10-11-32-22-7-2-1-4-18(22)14-23(32)26(31)34/h3,5-6,8-9,12-16H,1-2,4,7,10-11H2,(H,28,33)(H,27,29,30)	5081	1	O=C1c2cc3c(n2CCN1c1cccc(-c2c[nH]c(=O)c(Nc4ccncn4)c2)c1)CCCC3	delta_fused	Tyrosine-protein kinase BTK,Homo sapiens										1.07317										1
InChI=1S/C26H25N3O/c30-25-17-27-26(21-11-5-2-6-12-21)23-13-7-8-14-24(23)29(25)22-15-16-28(19-22)18-20-9-3-1-4-10-20/h1-14,22H,15-19H2/p+1	5083	1	O=C1CN=C(c2ccccc2)c2ccccc2N1C1CC[NH+](Cc2ccccc2)C1	epsilon_fused	Mus musculus,Mus musculus										1.96154										1
InChI=1S/C26H25N5O2/c32-24(17-31-15-5-7-19-6-1-2-8-21(19)25(31)33)27-16-18-11-13-20(14-12-18)28-26-29-22-9-3-4-10-23(22)30-26/h1-4,6,8-14H,5,7,15-17H2,(H,27,32)(H2,28,29,30)	5087	1	O=C(CN1CCCc2ccccc2C1=O)NCc1ccc(Nc2nc3ccccc3[nH]2)cc1	epsilon_fused	Integrin alpha-V/beta-3,Homo sapiens										1.53846										1
InChI=1S/C26H25N5O2/c32-24(17-31-23-10-4-1-6-19(23)7-5-11-25(31)33)27-16-18-12-14-20(15-13-18)28-26-29-21-8-2-3-9-22(21)30-26/h1-4,6,8-10,12-15H,5,7,11,16-17H2,(H,27,32)(H2,28,29,30)	5088	1	O=C(CN1C(=O)CCCc2ccccc21)NCc1ccc(Nc2nc3ccccc3[nH]2)cc1	epsilon_fused	Integrin alpha-V/beta-3,Homo sapiens										1.53846										1
InChI=1S/C26H25N5O4/c32-22(18-10-13-27-14-11-18)28-20-7-5-17(6-8-20)9-12-26(24(34)29-25(35)30-26)16-31-15-19-3-1-2-4-21(19)23(31)33/h1-8,18,27H,10-11,13-16H2,(H,28,32)(H2,29,30,34,35)/p+1	5089	1	O=C1NC(=O)C(C#Cc2ccc(NC(=O)C3CC[NH2+]CC3)cc2)(CN2Cc3ccccc3C2=O)N1	gamma_fused	TNF-alpha,Homo sapiens										1.40099										1
InChI=1S/C26H26N2O3/c29-26-21-16-23(18-11-12-24-25(15-18)31-17-30-24)28(20-9-5-2-6-10-20)22(21)13-14-27(26)19-7-3-1-4-8-19/h2,5-6,9-12,15-16,19H,1,3-4,7-8,13-14,17H2	5092	1	O=C1c2cc(-c3ccc4c(c3)OCO4)n(-c3ccccc3)c2CCN1C1CCCCC1	delta_fused	Cannabinoid CB1 receptor,Homo sapiens										1.3										1
InChI=1S/C26H26N2O4S/c29-25(13-16-33(31,32)23-10-9-19-5-1-2-6-20(19)17-23)27-14-11-22(12-15-27)28-18-21-7-3-4-8-24(21)26(28)30/h1-10,17,22H,11-16,18H2	5093	1	O=C(CCS(=O)(=O)c1ccc2ccccc2c1)N1CCC(N2Cc3ccccc3C2=O)CC1	gamma_fused	Coagulation factor X,Homo sapiens										1.67391										1
InChI=1S/C26H26N4O3/c31-23-22-7-3-2-6-21(22)17-30(23)18-26(24(32)27-25(33)28-26)13-12-19-8-10-20(11-9-19)16-29-14-4-1-5-15-29/h2-3,6-11H,1,4-5,14-18H2,(H2,27,28,32,33)/p+1	5094	1	O=C1NC(=O)C(C#Cc2ccc(C[NH+]3CCCCC3)cc2)(CN2Cc3ccccc3C2=O)N1	gamma_fused	TNF-alpha,Homo sapiens										1.40099										1
InChI=1S/C26H26N4O3/c31-24-14-13-23(30(24)18-20-6-2-1-3-7-20)26(33)28-17-15-19-9-11-21(12-10-19)29-25(32)22-8-4-5-16-27-22/h1-12,16,23H,13-15,17-18H2,(H,28,33)(H,29,32)	5095	1	O=C(Nc1ccc(CCNC(=O)C2CCC(=O)N2Cc2ccccc2)cc1)c1ccccn1	gamma_single	Integrin alpha-4/beta-1,Homo sapiens										1.21818										1
InChI=1S/C26H26N6O3/c33-23-7-4-8-31(23)22-14-20(30-9-11-35-12-10-30)17-32-24(34)15-21(29-26(22)32)25-27-16-19(28-25)13-18-5-2-1-3-6-18/h1-3,5-6,14-17H,4,7-13H2,(H,27,28)	5096	1	O=C1CCCN1c1cc(N2CCOCC2)cn2c(=O)cc(-c3ncc(Cc4ccccc4)[nH]3)nc12	gamma_single	Integrase,Human immunodeficiency virus 1										2.96078										1
InChI=1S/C26H27N3O/c30-26-20-27(19-21-9-2-1-3-10-21)17-18-28(26)15-8-16-29-24-13-6-4-11-22(24)23-12-5-7-14-25(23)29/h1-7,9-14H,8,15-20H2/p+1	5097	1	O=C1C[NH+](Cc2ccccc2)CCN1CCCn1c2ccccc2c2ccccc21	delta_single	Plasmodium falciparum (isolate K1 / Thailand),Plasmodium falciparum K1										4.25										1
InChI=1S/C26H27N3O2/c30-25-22(19-21-8-10-24(11-9-21)28-16-14-27-20-28)5-4-15-29(25)26(12-17-31-18-13-26)23-6-2-1-3-7-23/h1-3,6-11,14,16,19-20H,4-5,12-13,15,17-18H2/b22-19+	5099	1	O=C1/C(=C/c2ccc(-n3ccnc3)cc2)CCCN1C1(c2ccccc2)CCOCC1	delta_single	Gamma-secretase,Homo sapiens										1.34146										1
InChI=1S/C26H27N3O2/c30-26-25-21(16-24(31-25)19-4-2-1-3-5-19)14-20-15-22(28-12-10-27-11-13-28)8-9-23(20)29(26)17-18-6-7-18/h1-5,8-9,15-16,18,27H,6-7,10-14,17H2/p+1	5100	1	O=C1c2oc(-c3ccccc3)cc2Cc2cc(N3CC[NH2+]CC3)ccc2N1CC1CC1	epsilon_fused	MAP kinase-activated protein kinase 2,Homo sapiens										1.3125										1
InChI=1S/C26H27N3O4S/c30-25-17-33-26(18-29(25)21-6-7-21)11-14-28(15-12-26)34(31,32)22-8-4-19(5-9-22)23-3-1-2-20-16-27-13-10-24(20)23/h1-5,8-10,13,16,21H,6-7,11-12,14-15,17-18H2	5103	1	O=C1COC2(CCN(S(=O)(=O)c3ccc(-c4cccc5cnccc45)cc3)CC2)CN1C1CC1	delta_spiro	Fatty acid synthase,Homo sapiens										15										1
InChI=1S/C26H27N3O4S/c30-25-17-33-26(18-29(25)22-7-8-22)11-14-28(15-12-26)34(31,32)23-9-5-19(6-10-23)21-4-3-20-2-1-13-27-24(20)16-21/h1-6,9-10,13,16,22H,7-8,11-12,14-15,17-18H2	5104	1	O=C1COC2(CCN(S(=O)(=O)c3ccc(-c4ccc5cccnc5c4)cc3)CC2)CN1C1CC1	delta_spiro	Fatty acid synthase,Homo sapiens										15										1
InChI=1S/C26H27N3O4S/c30-25-17-33-26(18-29(25)23-5-6-23)10-13-28(14-11-26)34(31,32)24-7-3-19(4-8-24)20-1-2-22-16-27-12-9-21(22)15-20/h1-4,7-9,12,15-16,23H,5-6,10-11,13-14,17-18H2	5105	1	O=C1COC2(CCN(S(=O)(=O)c3ccc(-c4ccc5cnccc5c4)cc3)CC2)CN1C1CC1	delta_spiro	Fatty acid synthase,Homo sapiens										15										1
InChI=1S/C26H27N5O3/c32-23-22-4-2-1-3-21(22)10-14-31(23)18-26(24(33)28-25(34)29-26)11-9-19-5-7-20(8-6-19)17-30-15-12-27-13-16-30/h1-8,27H,10,12-18H2,(H2,28,29,33,34)/p+2	5107	1	O=C1NC(=O)C(C#Cc2ccc(C[NH+]3CC[NH2+]CC3)cc2)(CN2CCc3ccccc3C2=O)N1	delta_fused	TNF-alpha,Homo sapiens										1.40099										1
InChI=1S/C26H27NO2/c28-25-17-22-8-4-5-9-24(22)26(21-6-2-1-3-7-21)27(25)23-12-10-19(11-13-23)16-20-14-15-29-18-20/h1-9,14-15,18-19,23,26H,10-13,16-17H2	5108	1	O=C1Cc2ccccc2C(c2ccccc2)N1C1CCC(Cc2ccoc2)CC1	delta_fused	p53-binding protein Mdm-2,Homo sapiens										1.24174										1
InChI=1S/C26H27NO3/c28-25-16-22(20-11-13-29-14-12-20)15-23-26(21-9-5-2-6-10-21)24(17-27(23)25)30-18-19-7-3-1-4-8-19/h1-11,16,23-24,26H,12-15,17-18H2	5110	1	O=C1C=C(C2=CCOCC2)CC2C(c3ccccc3)C(OCc3ccccc3)CN12	delta_fused	Neurokinin 1 receptor,Homo sapiens										1.14667										1
InChI=1S/C26H28N4O4S/c31-25(29-14-11-22(17-29)21-7-3-12-27-16-21)18-30-13-4-8-24(26(30)32)28-35(33,34)23-10-9-19-5-1-2-6-20(19)15-23/h1-3,5-7,9-10,12,15-16,22,24,28H,4,8,11,13-14,17-18H2	5114	1	O=C(CN1CCCC(NS(=O)(=O)c2ccc3ccccc3c2)C1=O)N1CCC(c2cccnc2)C1	delta_single	Coagulation factor X,Homo sapiens										1.67391										1
InChI=1S/C26H28N4O4S/c31-25(30-15-5-10-24(30)21-8-3-13-27-17-21)18-29-14-4-9-23(26(29)32)28-35(33,34)22-12-11-19-6-1-2-7-20(19)16-22/h1-3,6-8,11-13,16-17,23-24,28H,4-5,9-10,14-15,18H2	5115	1	O=C1C(NS(=O)(=O)c2ccc3ccccc3c2)CCCN1CC(=O)N1CCCC1c1cccnc1	delta_single	Coagulation factor X,Homo sapiens										1.67391										1
InChI=1S/C26H29N5O2/c32-24-17-19(18-30-16-15-27-29-30)11-12-22-13-14-23(31(22)24)26(33)28-25(20-7-3-1-4-8-20)21-9-5-2-6-10-21/h1-10,15-16,19,22-23,25H,11-14,17-18H2,(H,28,33)	5123	1	O=C(NC(c1ccccc1)c1ccccc1)C1CCC2CCC(Cn3ccnn3)CC(=O)N21	epsilon_fused	Inhibitor of apoptosis protein 3,Homo sapiens										2.31169										1
InChI=1S/C26H29N5O2/c32-25-17-24(30-10-2-1-3-11-30)26(31(25)21-8-9-22-23(16-21)28-18-27-22)19-4-6-20(7-5-19)29-12-14-33-15-13-29/h4-9,16-18,26H,1-3,10-15H2,(H,27,28)	5124	1	O=C1C=C(N2CCCCC2)C(c2ccc(N3CCOCC3)cc2)N1c1ccc2nc[nH]c2c1	gamma_single	Glutaminyl-peptide cyclotransferase,Homo sapiens										1.4										1
InChI=1S/C26H30N2O4/c29-23-16-22(26(31)32-18-20-12-6-2-7-13-20)28(23)24(21-14-8-3-9-15-21)25(30)27-17-19-10-4-1-5-11-19/h2-3,6-9,12-15,19,22,24H,1,4-5,10-11,16-18H2,(H,27,30)	5125	1	O=C(OCc1ccccc1)C1CC(=O)N1C(C(=O)NCC1CCCCC1)c1ccccc1	beta_single	Human immunodeficiency virus type 1 protease,Human immunodeficiency virus 1										1.04878										1
InChI=1S/C26H30N4O4/c31-24-16-30(17-25(32)29-12-10-19(11-13-29)27-15-18-6-7-18)26(33)22-14-21(8-9-23(22)28-24)34-20-4-2-1-3-5-20/h1-5,8-9,14,18-19,27H,6-7,10-13,15-17H2,(H,28,31)/p+1	5128	1	O=C1CN(CC(=O)N2CCC([NH2+]CC3CC3)CC2)C(=O)c2cc(Oc3ccccc3)ccc2N1	epsilon_fused	Ghrelin receptor,Homo sapiens										1.08824										1
InChI=1S/C26H31N3O2/c30-24-26(16-18-28(19-17-26)25(31)27-21-12-6-2-7-13-21)23(20-10-4-1-5-11-20)29(24)22-14-8-3-9-15-22/h1,3-5,8-11,14-15,21,23H,2,6-7,12-13,16-19H2,(H,27,31)	5129	1	O=C(NC1CCCCC1)N1CCC2(CC1)C(=O)N(c1ccccc1)C2c1ccccc1	beta_spiro	Vanilloid receptor,Homo sapiens										2.45455										1
InChI=1S/C26H31N5O2/c32-24(17-31-15-5-7-19-6-1-2-8-21(19)25(31)33)27-16-18-11-13-20(14-12-18)28-26-29-22-9-3-4-10-23(22)30-26/h1-4,6,8-10,18,20H,5,7,11-17H2,(H,27,32)(H2,28,29,30)	5131	1	O=C(CN1CCCc2ccccc2C1=O)NCC1CCC(Nc2nc3ccccc3[nH]2)CC1	epsilon_fused	Integrin alpha-V/beta-3,Homo sapiens										1.53846										1
InChI=1S/C26H31N5O2/c32-24(17-31-23-10-4-1-6-19(23)7-5-11-25(31)33)27-16-18-12-14-20(15-13-18)28-26-29-21-8-2-3-9-22(21)30-26/h1-4,6,8-10,18,20H,5,7,11-17H2,(H,27,32)(H2,28,29,30)	5132	1	O=C(CN1C(=O)CCCc2ccccc21)NCC1CCC(Nc2nc3ccccc3[nH]2)CC1	epsilon_fused	Integrin alpha-V/beta-3,Homo sapiens										1.53846										1
InChI=1S/C26H32N4O2/c31-24(28-16-18-6-7-19-3-1-4-22(19)15-18)17-30-14-12-21(26(30)32)9-11-23-10-8-20-5-2-13-27-25(20)29-23/h6-8,10,15,21H,1-5,9,11-14,16-17H2,(H,27,29)(H,28,31)	5134	1	O=C(CN1CCC(CCc2ccc3c(n2)NCCC3)C1=O)NCc1ccc2c(c1)CCC2	gamma_single	Integrin alpha-V/beta-3,Homo sapiens										1.53846										1
InChI=1S/C26H32N4O3/c31-24(28-15-13-19-8-3-1-4-9-19)17-29-25(32)23(16-20-10-5-2-6-11-20)30-18-22-21(26(30)33)12-7-14-27-22/h2,5-7,10-12,14,19,23H,1,3-4,8-9,13,15-18H2,(H,28,31)(H,29,32)	5135	1	O=C(CNC(=O)C(Cc1ccccc1)N1Cc2ncccc2C1=O)NCCC1CCCCC1	gamma_fused	Renin,Homo sapiens										1.09804										1
InChI=1S/C26H32N4O3/c31-24(29-12-2-1-3-13-29)16-19-4-6-20(7-5-19)21-8-10-22(11-9-21)30-14-15-33-25-23(26(30)32)17-27-18-28-25/h8-11,17-20H,1-7,12-16H2	5136	1	O=C(CC1CCC(c2ccc(N3CCOc4ncncc4C3=O)cc2)CC1)N1CCCCC1	epsilon_fused	Diacylglycerol O-acyltransferase 1,Homo sapiens										1.17808										1
InChI=1S/C26H32N4O3/c31-24(29-21-3-1-2-4-21)15-18-5-7-19(8-6-18)20-9-11-22(12-10-20)30-13-14-33-25-23(26(30)32)16-27-17-28-25/h9-12,16-19,21H,1-8,13-15H2,(H,29,31)	5137	1	O=C(CC1CCC(c2ccc(N3CCOc4ncncc4C3=O)cc2)CC1)NC1CCCC1	epsilon_fused	Diacylglycerol O-acyltransferase 1,Homo sapiens										1.17808										1
InChI=1S/C26H33N3O/c30-26-19-28-25-18-23(9-5-4-8-22-12-15-27-16-13-22)10-11-24(25)20-29(26)17-14-21-6-2-1-3-7-21/h1-3,5-7,9-11,18,22,27-28H,4,8,12-17,19-20H2/p+1/b9-5+	5139	1	O=C1CNc2cc(/C=C/CCC3CC[NH2+]CC3)ccc2CN1CCc1ccccc1	epsilon_fused	Homo sapiens,Homo sapiens										1.31944										1
InChI=1S/C26H33N3O/c30-26-25-9-5-4-8-23(25)20-29(26)24-12-16-28(17-13-24)19-22-10-14-27(15-11-22)18-21-6-2-1-3-7-21/h1-9,22,24H,10-20H2/p+2	5141	1	O=C1c2ccccc2CN1C1CC[NH+](CC2CC[NH+](Cc3ccccc3)CC2)CC1	gamma_fused	Poly [ADP-ribose] polymerase-1,Mus musculus										1.56522										1
InChI=1S/C26H33N5O3/c32-24(28-13-14-29-26(34)30-17-20-4-2-1-3-5-20)21-6-7-22-18-31(25(33)23(22)16-21)15-10-19-8-11-27-12-9-19/h1-7,16,19,27H,8-15,17-18H2,(H,28,32)(H2,29,30,34)/p+1	5143	1	O=C(NCCNC(=O)c1ccc2c(c1)C(=O)N(CCC1CC[NH2+]CC1)C2)NCc1ccccc1	gamma_fused	Homo sapiens,Homo sapiens										1.31944										1
InChI=1S/C26H33N5O4/c32-23(30-18-24(33)29-17-22-10-4-6-13-27-22)11-5-7-14-28-25(34)19-31-15-12-21(26(31)35)16-20-8-2-1-3-9-20/h1-4,6,8-10,13,21H,5,7,11-12,14-19H2,(H,28,34)(H,29,33)(H,30,32)	5144	1	O=C(CCCCNC(=O)CN1CCC(Cc2ccccc2)C1=O)NCC(=O)NCc1ccccn1	gamma_single	Renin,Homo sapiens										1.09804										1
InChI=1S/C26H33NO/c28-25-26(21-23-14-5-2-6-15-23,19-20-27(25)24-16-7-8-17-24)18-10-9-13-22-11-3-1-4-12-22/h1-6,11-12,14-15,24H,7-10,13,16-21H2	5146	1	O=C1N(C2CCCC2)CCC1(CCCCc1ccccc1)Cc1ccccc1	gamma_single	Human immunodeficiency virus type 1 protease,Human immunodeficiency virus 1										1.04878										1
InChI=1S/C26H34N2O/c29-25-16-10-20-28(25)24-15-9-14-23(21-24)26(17-6-2-7-18-26)27-19-8-5-13-22-11-3-1-4-12-22/h1,3-4,9,11-12,14-15,21,27H,2,5-8,10,13,16-20H2/p+1	5147	1	O=C1CCCN1c1cccc(C2([NH2+]CCCCc3ccccc3)CCCCC2)c1	gamma_single	Beta-secretase 1,Homo sapiens										1.15254										1
InChI=1S/C26H34N2O4S/c29-26-21-32-20-24(18-22-10-3-1-4-11-22)28(26)17-9-16-27(19-23-12-7-8-13-23)33(30,31)25-14-5-2-6-15-25/h1-6,10-11,14-15,23-24H,7-9,12-13,16-21H2	5150	1	O=C1COCC(Cc2ccccc2)N1CCCN(CC1CCCC1)S(=O)(=O)c1ccccc1	delta_single	Human immunodeficiency virus type 1 protease,Human immunodeficiency virus 1										1.04878										1
InChI=1S/C26H34N4O2/c31-25-18-29-24-9-8-22(26(32)28-13-4-7-21-10-14-27-15-11-21)17-23(24)19-30(25)16-12-20-5-2-1-3-6-20/h1-3,5-6,8-9,17,21,27,29H,4,7,10-16,18-19H2,(H,28,32)/p+1	5151	1	O=C(NCCCC1CC[NH2+]CC1)c1ccc2c(c1)CN(CCc1ccccc1)C(=O)CN2	epsilon_fused	Homo sapiens,Homo sapiens										1.31944										1
InChI=1S/C26H34N6O2/c33-23-11-5-13-32(23)14-6-12-27-25(34)22-17-28-26(31-24(22)29-20-9-3-4-10-20)30-21-15-18-7-1-2-8-19(18)16-21/h1-2,7-8,17,20-21H,3-6,9-16H2,(H,27,34)(H2,28,29,30,31)	5152	1	O=C(NCCCN1CCCC1=O)c1cnc(NC2Cc3ccccc3C2)nc1NC1CCCC1	gamma_single	Tyrosine-protein kinase receptor TYRO3,Homo sapiens										1.85714										1
InChI=1S/C26H35N3O/c30-26-19-28-25-18-23(9-5-4-8-22-12-15-27-16-13-22)10-11-24(25)20-29(26)17-14-21-6-2-1-3-7-21/h1-3,6-7,10-11,18,22,27-28H,4-5,8-9,12-17,19-20H2/p+1	5153	1	O=C1CNc2cc(CCCCC3CC[NH2+]CC3)ccc2CN1CCc1ccccc1	epsilon_fused	Homo sapiens,Homo sapiens										1.31944										1
InChI=1S/C26H35N3O/c30-26-22-28(17-13-23-7-3-1-4-8-23)19-20-29(26)18-14-24-9-11-25(12-10-24)21-27-15-5-2-6-16-27/h1,3-4,7-12H,2,5-6,13-22H2/p+2	5154	1	O=C1C[NH+](CCc2ccccc2)CCN1CCc1ccc(C[NH+]2CCCCC2)cc1	delta_single	Melanin-concentrating hormone receptor 1,Homo sapiens										1.47059										1
InChI=1S/C26H36N4O2/c31-25-15-9-14-24(26(32)29-20-10-3-1-4-11-20)30(25)19-8-2-7-17-27-23-16-18-28-22-13-6-5-12-21(22)23/h5-6,12-13,16,18,20,24H,1-4,7-11,14-15,17,19H2,(H,27,28)(H,29,32)/p+1	5155	1	O=C(NC1CCCCC1)C1CCCC(=O)N1CCCCCNc1cc[nH+]c2ccccc12	delta_single	Plasmodium falciparum,Plasmodium falciparum										2.32984										1
InChI=1S/C26H38N4O3/c31-24(12-6-2-5-10-21-8-3-1-4-9-21)28-14-16-29(17-15-28)26(33)30-20-23(25(30)32)18-22-11-7-13-27-19-22/h1,3-4,8-9,22-23,27H,2,5-7,10-20H2	5156	1	O=C(CCCCCc1ccccc1)N1CCN(C(=O)N2CC(CC3CCCNC3)C2=O)CC1	beta_single	Tryptase,Homo sapiens										1.07059										1
InChI=1S/C26H39N3O/c30-25-11-13-26(23-7-3-1-4-8-23,21-29(25)17-12-22-9-10-22)14-18-27-19-24(20-27)28-15-5-2-6-16-28/h1,3-4,7-8,22,24H,2,5-6,9-21H2/p+2	5157	1	O=C1CCC(CC[NH+]2CC([NH+]3CCCCC3)C2)(c2ccccc2)CN1CCC1CC1	delta_single	Neurokinin 2 receptor,Homo sapiens										1.07143										1
InChI=1S/C26H39N3O2/c30-25-9-8-22-18-23(26(31)28-16-12-21-10-14-27-15-11-21)6-7-24(22)19-29(25)17-13-20-4-2-1-3-5-20/h6-7,18,20-21,27H,1-5,8-17,19H2,(H,28,31)/p+1	5158	1	O=C(NCCC1CC[NH2+]CC1)c1ccc2c(c1)CCC(=O)N(CCC1CCCCC1)C2	epsilon_fused	Homo sapiens,Homo sapiens										1.31944										1
InChI=1S/C26H42N4O4S2/c31-23-13-11-19-29(23)25(33)35-21-17-27-15-9-7-5-3-1-2-4-6-8-10-16-28-18-22-36-26(34)30-20-12-14-24(30)32/h17-18,21-22,27-28H,1-16,19-20H2	5159	1	O=C1CCCN1C(=O)SC=CNCCCCCCCCCCCCNC=CSC(=O)N1CCCC1=O	gamma_single	Plasmodium falciparum,Plasmodium falciparum										2.32984										1
InChI=1S/C26H44N4O3/c31-24(12-6-2-5-10-21-8-3-1-4-9-21)28-14-16-29(17-15-28)26(33)30-20-23(25(30)32)18-22-11-7-13-27-19-22/h21-23,27H,1-20H2	5160	1	O=C(CCCCCC1CCCCC1)N1CCN(C(=O)N2CC(CC3CCCNC3)C2=O)CC1	beta_single	Tryptase,Homo sapiens										1.07059										1
InChI=1S/C27H19N7O3/c35-24-21-5-2-1-4-18(21)15-34(24)16-27(25(36)32-26(37)33-27)9-8-17-10-19(12-28-11-17)22-6-3-7-23(31-22)20-13-29-30-14-20/h1-7,10-14H,15-16H2,(H,29,30)(H2,32,33,36,37)	5161	1	O=C1NC(=O)C(C#Cc2cncc(-c3cccc(-c4cn[nH]c4)n3)c2)(CN2Cc3ccccc3C2=O)N1	gamma_fused	TNF-alpha,Homo sapiens										1.40099										1
InChI=1S/C27H19N7O4/c35-23-21-6-2-1-4-19(21)15-33(23)16-27(24(36)29-25(37)30-27)12-11-17-7-9-20(10-8-17)34-22(31-32-26(34)38)18-5-3-13-28-14-18/h1-10,13-14H,15-16H2,(H3,29,30,32,36,37,38)/p-1	5162	1	O=C1NC(=O)C(C#Cc2ccc(-n3c(-c4cccnc4)n[n-]c3=O)cc2)(CN2Cc3ccccc3C2=O)N1	gamma_fused	TNF-alpha,Homo sapiens										1.40099										1
InChI=1S/C27H21N3O3/c31-24-23-9-5-4-8-22(23)17-30(24)18-27(25(32)28-26(33)29-27)15-14-19-10-12-21(13-11-19)16-20-6-2-1-3-7-20/h1-13H,16-18H2,(H2,28,29,32,33)	5166	1	O=C1NC(=O)C(C#Cc2ccc(Cc3ccccc3)cc2)(CN2Cc3ccccc3C2=O)N1	gamma_fused	TNF-alpha,Homo sapiens										1.40099										1
InChI=1S/C27H21N5O2S/c33-24(29-14-20-13-19(16-35-20)25-30-22-9-5-11-28-26(22)31-25)15-32-23-10-4-2-7-18(23)12-17-6-1-3-8-21(17)27(32)34/h1-11,13,16H,12,14-15H2,(H,29,33)(H,28,30,31)	5168	1	O=C(CN1C(=O)c2ccccc2Cc2ccccc21)NCc1cc(-c2nc3ccc[nH]c-3n2)cs1	epsilon_fused	Integrin alpha-V/beta-3,Homo sapiens										1.53846										1
InChI=1S/C27H22N4O2/c32-26(30-15-8-16-30)20-12-7-11-19(17-20)25-28-22-23(29-25)27(33)31(21-13-5-2-6-14-21)24(22)18-9-3-1-4-10-18/h1-7,9-14,17,24H,8,15-16H2,(H,28,29)	5169	1	O=C(c1cccc(-c2nc3c([nH]2)C(c2ccccc2)N(c2ccccc2)C3=O)c1)N1CCC1	gamma_fused	p53-binding protein Mdm-2,Homo sapiens										1.24174										1
InChI=1S/C27H22N4O3/c32-24(29-16-25(33)30-23-9-3-6-19-7-4-14-28-26(19)23)15-18-10-12-21(13-11-18)31-17-20-5-1-2-8-22(20)27(31)34/h1-14H,15-17H2,(H,29,32)(H,30,33)	5170	1	O=C(Cc1ccc(N2Cc3ccccc3C2=O)cc1)NCC(=O)Nc1cccc2cccnc12	gamma_fused	Plasmodium falciparum,Plasmodium falciparum										2.32984										1
InChI=1S/C27H23N3O/c31-26-17-22-10-4-5-11-25(22)27(21-8-2-1-3-9-21)30(26)24-14-12-23(13-15-24)29-19-20-7-6-16-28-18-20/h1-16,18,27,29H,17,19H2	5172	1	O=C1Cc2ccccc2C(c2ccccc2)N1c1ccc(NCc2cccnc2)cc1	delta_fused	Tumour suppressor p53/oncoprotein Mdm2,Homo sapiens										2.48718										1
InChI=1S/C27H23N3O3/c31-26-20(18-19-6-2-1-3-7-19)15-17-30(26)27(32)29-21-10-12-22(13-11-21)33-25-14-16-28-24-9-5-4-8-23(24)25/h1-14,16,20H,15,17-18H2,(H,29,32)	5175	1	O=C(Nc1ccc(Oc2ccnc3ccccc23)cc1)N1CCC(Cc2ccccc2)C1=O	gamma_single	Hepatocyte growth factor receptor,Homo sapiens										1.95833										1
InChI=1S/C27H23N5O4S/c33-26-24-16-23(37(35,36)30-14-4-5-15-30)12-13-25(24)31(27(26)34)17-21-18-32(29-28-21)22-10-8-20(9-11-22)19-6-2-1-3-7-19/h1-3,6-13,16,18H,4-5,14-15,17H2	5176	1	O=C1C(=O)N(Cc2cn(-c3ccc(-c4ccccc4)cc3)nn2)c2ccc(S(=O)(=O)N3CCCC3)cc21	gamma_fused	Caspase-3,Homo sapiens										1.3046										1
InChI=1S/C27H23N5O4S/c33-26-24-16-23(37(35,36)30-14-4-5-15-30)12-13-25(24)31(27(26)34)18-22-17-28-29-32(22)21-10-8-20(9-11-21)19-6-2-1-3-7-19/h1-3,6-13,16-17H,4-5,14-15,18H2	5177	1	O=C1C(=O)N(Cc2cnnn2-c2ccc(-c3ccccc3)cc2)c2ccc(S(=O)(=O)N3CCCC3)cc21	gamma_fused	Caspase-3,Homo sapiens										1.3046										1
InChI=1S/C27H23N5O5/c33-21-20-7-2-1-4-17(20)14-32(21)15-26(22(34)28-24(36)30-26)13-12-16-8-10-19(11-9-16)27(18-5-3-6-18)23(35)29-25(37)31-27/h1-2,4,7-11,18H,3,5-6,14-15H2,(H2,28,30,34,36)(H2,29,31,35,37)	5178	1	O=C1NC(=O)C(C#Cc2ccc(C3(C4CCC4)NC(=O)NC3=O)cc2)(CN2Cc3ccccc3C2=O)N1	gamma_fused	TNF-alpha,Homo sapiens										1.40099										1
InChI=1S/C27H23NO3S/c29-24-10-5-15-28(24)16-17-30-19-13-11-18(12-14-19)26-25-21-7-2-4-9-23(21)32-27(25)20-6-1-3-8-22(20)31-26/h1-4,6-9,11-14,26H,5,10,15-17H2	5180	1	O=C1CCCN1CCOc1ccc(C2Oc3ccccc3-c3sc4ccccc4c32)cc1	gamma_single	MCF7,Homo sapiens										4.16514										1
InChI=1S/C27H24N2O2/c30-27-16-8-18-29(27)23-12-6-11-22(19-23)28-17-7-14-25(28)24-13-4-5-15-26(24)31-20-21-9-2-1-3-10-21/h1-7,9-15,17,19H,8,16,18,20H2	5181	1	O=C1CCCN1c1cccc(-n2cccc2-c2ccccc2OCc2ccccc2)c1	gamma_single	Prostanoid EP1 receptor,Homo sapiens										5										1
InChI=1S/C27H24N2O6/c30-24(34-17-19-8-3-1-4-9-19)16-28-22(14-13-21-12-7-15-33-21)25(26(28)31)29-23(18-35-27(29)32)20-10-5-2-6-11-20/h1-15,22-23,25H,16-18H2/b14-13+	5183	1	O=C(CN1C(=O)C(N2C(=O)OCC2c2ccccc2)C1/C=C/c1ccco1)OCc1ccccc1	beta_single	Vasopressin V1a receptor,Homo sapiens										1.76471										1
InChI=1S/C27H24N4O2S/c32-26(30-16-22-13-19(18-34-22)15-29-25-11-5-6-12-28-25)17-31-24-10-4-2-8-21(24)14-20-7-1-3-9-23(20)27(31)33/h1-13,18H,14-17H2,(H,28,29)(H,30,32)	5185	1	O=C(CN1C(=O)c2ccccc2Cc2ccccc21)NCc1cc(CNc2ccccn2)cs1	epsilon_fused	Integrin alpha-V/beta-3,Homo sapiens										1.53846										1
InChI=1S/C27H24N4O3/c32-23(18-15-16-18)17-31-22-14-8-7-13-21(22)24(19-9-3-1-4-10-19)29-25(26(31)33)30-27(34)28-20-11-5-2-6-12-20/h1-14,18,25H,15-17H2,(H2,28,30,34)	5186	1	O=C(Nc1ccccc1)NC1N=C(c2ccccc2)c2ccccc2N(CC(=O)C2CC2)C1=O	epsilon_fused	Cholecystokinin B receptor,Rattus norvegicus										1.64706										1
InChI=1S/C27H24N4O4/c32-24-11-23-27(34)31-19(10-18-13-28-22-9-5-4-8-20(18)22)16-35-25(31)15-30(23)14-21(24)26(33)29-12-17-6-2-1-3-7-17/h1-9,11,13-14,19,25,28H,10,12,15-16H2,(H,29,33)	5187	1	O=C(NCc1ccccc1)c1cn2c(cc1=O)C(=O)N1C(Cc3c[nH]c4ccccc34)COC1C2	delta_fused	Human immunodeficiency virus,Human immunodeficiency virus										1.03448										1
InChI=1S/C27H24N4O4/c32-26-22-8-6-20(14-24(22)28-16-18-4-1-10-30(18)26)34-12-3-13-35-21-7-9-23-25(15-21)29-17-19-5-2-11-31(19)27(23)33/h1-2,6-11,14-19H,3-5,12-13H2	5188	1	O=C1c2ccc(OCCCOc3ccc4c(c3)N=CC3CC=CN3C4=O)cc2N=CC2CC=CN12	epsilon_fused	A2780,Homo sapiens										2.5										1
InChI=1S/C27H24N8O2/c36-26-22(29-25-14-20-16-28-8-9-35(20)32-25)15-21(30-31-26)17-5-3-6-19(12-17)33-10-11-34-23-7-2-1-4-18(23)13-24(34)27(33)37/h1-7,12-15,28H,8-11,16H2,(H,31,36)(H,29,30,32)/p+1	5190	1	O=C1c2cc3ccccc3n2CCN1c1cccc(-c2cc(Nc3cc4n(n3)CC[NH2+]C4)c(=O)[nH]n2)c1	delta_fused	Tyrosine-protein kinase BTK,Homo sapiens										1.07317										1
InChI=1S/C27H25N3O2/c31-26-12-7-15-30(26)22-13-14-23-24(27(32)28-17-20-8-3-1-4-9-20)19-29(25(23)16-22)18-21-10-5-2-6-11-21/h1-6,8-11,13-14,16,19H,7,12,15,17-18H2,(H,28,32)	5191	1	O=C(NCc1ccccc1)c1cn(Cc2ccccc2)c2cc(N3CCCC3=O)ccc12	gamma_single	Sphingosine 1-phosphate receptor Edg-3,Homo sapiens										2										1
InChI=1S/C27H25N3O2/c31-27-8-2-4-15-30(27)18-20-9-11-21(12-10-20)22-16-25-24(7-5-14-29-25)26(17-22)32-19-23-6-1-3-13-28-23/h1,3,5-7,9-14,16-17H,2,4,8,15,18-19H2	5194	1	O=C1CCCCN1Cc1ccc(-c2cc(OCc3ccccn3)c3cccnc3c2)cc1	delta_single	Tyrosine-protein kinase SYK,Homo sapiens										1.1										1
InChI=1S/C27H25N5O2/c33-26-22(30-25-10-3-4-11-28-25)15-20(17-29-26)18-7-5-8-21(14-18)31-12-13-32-23-9-2-1-6-19(23)16-24(32)27(31)34/h3-5,7-8,10-11,14-17H,1-2,6,9,12-13H2,(H,28,30)(H,29,33)	5197	1	O=C1c2cc3c(n2CCN1c1cccc(-c2c[nH]c(=O)c(Nc4ccccn4)c2)c1)CCCC3	delta_fused	Tyrosine-protein kinase BTK,Homo sapiens										1.07317										1
InChI=1S/C27H25N5O4/c33-24-12-23(27(35)36-16-19-9-5-2-6-10-19)32(24)22(11-18-7-3-1-4-8-18)26(34)30-15-21-25-20(14-29-21)13-28-17-31-25/h1-10,13-14,17,21-23H,11-12,15-16H2,(H,30,34)	5198	1	O=C(NCC1N=Cc2cncnc21)C(Cc1ccccc1)N1C(=O)CC1C(=O)OCc1ccccc1	beta_single	Human immunodeficiency virus type 1 protease,Human immunodeficiency virus 1										1.04878										1
InChI=1S/C27H26N2O2/c30-26-17-22(18-29(26)25-15-7-11-20-10-4-5-14-24(20)25)27(31)28-23-13-6-12-21(16-23)19-8-2-1-3-9-19/h1-3,6-9,11-13,15-16,22H,4-5,10,14,17-18H2,(H,28,31)	5207	1	O=C(Nc1cccc(-c2ccccc2)c1)C1CC(=O)N(c2cccc3c2CCCC3)C1	gamma_single	Enoyl-[acyl-carrier-protein] reductase,Mycobacterium tuberculosis										2.65789										1
InChI=1S/C27H26N2OS/c30-27-22-18-24(26-17-19-9-7-8-14-25(19)31-26)29(21-12-5-2-6-13-21)23(22)15-16-28(27)20-10-3-1-4-11-20/h2,5-9,12-14,17-18,20H,1,3-4,10-11,15-16H2	5213	1	O=C1c2cc(-c3cc4ccccc4s3)n(-c3ccccc3)c2CCN1C1CCCCC1	delta_fused	Cannabinoid CB1 receptor,Homo sapiens										1.3										1
InChI=1S/C27H26N4O2S/c32-26-22-17-29(20-12-6-2-7-13-20)27(33)25(22)30(18-34-21-14-8-3-9-15-21)24-16-23(28-31(24)26)19-10-4-1-5-11-19/h1,3-5,8-11,14-16,20H,2,6-7,12-13,17-18H2	5216	1	O=C1c2c(c(=O)n3nc(-c4ccccc4)cc3n2CSc2ccccc2)CN1C1CCCCC1	gamma_fused	Acyl coenzyme A:cholesterol acyltransferase 1,Rattus norvegicus										2.2										1
InChI=1S/C27H26N6O2S/c34-26-22(30-24-13-19-15-28-8-10-33(19)31-24)12-17(14-29-26)16-3-1-4-18(11-16)32-9-7-21-20-5-2-6-23(20)36-25(21)27(32)35/h1,3-4,11-14,28H,2,5-10,15H2,(H,29,34)(H,30,31)/p+1	5219	1	O=C1c2sc3c(c2CCN1c1cccc(-c2c[nH]c(=O)c(Nc4cc5n(n4)CC[NH2+]C5)c2)c1)CCC3	delta_fused	Tyrosine-protein kinase BTK,Homo sapiens										1.07317										1
InChI=1S/C27H26N6O3/c34-23-13-22(26(35)29-12-11-18-7-3-1-4-8-18)33(23)25(19-9-5-2-6-10-19)27(36)31-16-21-24-20(15-30-21)14-28-17-32-24/h1-10,14-15,17,21-22,25H,11-13,16H2,(H,29,35)(H,31,36)	5220	1	O=C(NCCc1ccccc1)C1CC(=O)N1C(C(=O)NCC1N=Cc2cncnc21)c1ccccc1	beta_single	Human immunodeficiency virus type 1 protease,Human immunodeficiency virus 1										1.04878										1
InChI=1S/C27H27N3O2/c31-26(29-23-17-9-10-18-28-23)24-21-15-7-8-16-22(21)27(32)30(20-13-5-2-6-14-20)25(24)19-11-3-1-4-12-19/h1,3-4,7-12,15-18,20,24-25H,2,5-6,13-14H2,(H,28,29,31)	5221	1	O=C(Nc1ccccn1)C1c2ccccc2C(=O)N(C2CCCCC2)C1c1ccccc1	delta_fused	Cannabinoid CB1 receptor,Homo sapiens										1.3										1
InChI=1S/C27H27N3O4/c31-24-14-29(17-6-2-1-3-7-17)27(32)21-13-19-18-8-4-5-9-20(18)28-25(19)26(30(21)24)16-10-11-22-23(12-16)34-15-33-22/h4-5,8-12,17,21,26,28H,1-3,6-7,13-15H2	5222	1	O=C1C2Cc3c([nH]c4ccccc34)C(c3ccc4c(c3)OCO4)N2C(=O)CN1C1CCCCC1	delta_fused	Phosphodiesterase 5A,Bos taurus										1.25										1
InChI=1S/C27H27N5O2/c33-25(28-15-7-8-16-29-27-30-22-12-4-5-13-23(22)31-27)18-32-24-14-6-2-10-20(24)17-19-9-1-3-11-21(19)26(32)34/h1-6,9-14H,7-8,15-18H2,(H,28,33)(H2,29,30,31)	5226	1	O=C(CN1C(=O)c2ccccc2Cc2ccccc21)NCCCCNc1nc2ccccc2[nH]1	epsilon_fused	Integrin alpha-V/beta-3,Homo sapiens										1.53846										1
InChI=1S/C27H27N7O2/c35-26-22(30-25-14-21-16-28-7-8-34(21)31-25)12-19(15-29-26)17-3-1-5-20(11-17)32-9-10-33-23-6-2-4-18(23)13-24(33)27(32)36/h1,3,5,11-15,28H,2,4,6-10,16H2,(H,29,35)(H,30,31)/p+1	5229	1	O=C1c2cc3c(n2CCN1c1cccc(-c2c[nH]c(=O)c(Nc4cc5n(n4)CC[NH2+]C5)c2)c1)CCC3	delta_fused	Tyrosine-protein kinase BTK,Homo sapiens										1.07317										1
InChI=1S/C27H27NO2/c29-26-24-18-10-11-19-25(24)27(22-14-6-2-7-15-22,30-23-16-8-3-9-17-23)28(26)20-21-12-4-1-5-13-21/h1-2,4-7,10-15,18-19,23H,3,8-9,16-17,20H2	5230	1	O=C1c2ccccc2C(OC2CCCCC2)(c2ccccc2)N1Cc1ccccc1	gamma_fused	p53-binding protein Mdm-2,Homo sapiens										1.24174										1
InChI=1S/C27H28N2O2/c30-26(13-7-10-22-8-3-1-4-9-22)29-19-18-28(27(31)21-29)20-23-14-16-25(17-15-23)24-11-5-2-6-12-24/h1-6,8-9,11-12,14-17H,7,10,13,18-21H2	5232	1	O=C(CCCc1ccccc1)N1CCN(Cc2ccc(-c3ccccc3)cc2)C(=O)C1	delta_single	Dipeptidyl peptidase IV,Homo sapiens										1.16667										1
InChI=1S/C27H28N2O3/c30-26-16-15-25(29(26)19-22-7-3-1-4-8-22)27(31)28-18-17-21-11-13-23(14-12-21)20-32-24-9-5-2-6-10-24/h1-14,25H,15-20H2,(H,28,31)	5233	1	O=C(NCCc1ccc(COc2ccccc2)cc1)C1CCC(=O)N1Cc1ccccc1	gamma_single	Integrin alpha-4/beta-1,Homo sapiens										1.21818										1
InChI=1S/C27H28N2O3/c30-26-16-15-25(29(26)19-22-7-3-1-4-8-22)27(31)28-18-17-21-11-13-24(14-12-21)32-20-23-9-5-2-6-10-23/h1-14,25H,15-20H2,(H,28,31)	5234	1	O=C(NCCc1ccc(OCc2ccccc2)cc1)C1CCC(=O)N1Cc1ccccc1	gamma_single	Integrin alpha-4/beta-1,Homo sapiens										1.21818										1
InChI=1S/C27H28N4O3/c32-25-13-12-24(31(25)19-22-5-2-1-3-6-22)27(34)29-16-14-20-8-10-21(11-9-20)17-30-26(33)23-7-4-15-28-18-23/h1-11,15,18,24H,12-14,16-17,19H2,(H,29,34)(H,30,33)	5237	1	O=C(NCc1ccc(CCNC(=O)C2CCC(=O)N2Cc2ccccc2)cc1)c1cccnc1	gamma_single	Integrin alpha-4/beta-1,Homo sapiens										1.21818										1
InChI=1S/C27H28N8O2/c36-26-22(29-25-14-20-16-28-8-9-35(20)32-25)15-21(30-31-26)17-5-3-6-19(12-17)33-10-11-34-23-7-2-1-4-18(23)13-24(34)27(33)37/h3,5-6,12-15,28H,1-2,4,7-11,16H2,(H,31,36)(H,29,30,32)/p+1	5241	1	O=C1c2cc3c(n2CCN1c1cccc(-c2cc(Nc4cc5n(n4)CC[NH2+]C5)c(=O)[nH]n2)c1)CCCC3	delta_fused	Tyrosine-protein kinase BTK,Homo sapiens										1.07317										1
InChI=1S/C27H29N3O/c31-26-18-22-8-4-5-9-25(22)27(21-6-2-1-3-7-21)30(26)24-12-10-23(11-13-24)29-19-20-14-16-28-17-15-20/h1-13,20,27-29H,14-19H2/p+1	5242	1	O=C1Cc2ccccc2C(c2ccccc2)N1c1ccc(NCC2CC[NH2+]CC2)cc1	delta_fused	Tumour suppressor p53/oncoprotein Mdm2,Homo sapiens										2.48718										1
InChI=1S/C27H29N3O2/c31-26-27(19-21-8-13-28-14-9-21,12-17-30(26)20-22-10-15-29-16-11-22)23-4-3-7-25(18-23)32-24-5-1-2-6-24/h3-4,7-11,13-16,18,24H,1-2,5-6,12,17,19-20H2	5244	1	O=C1N(Cc2ccncc2)CCC1(Cc1ccncc1)c1cccc(OC2CCCC2)c1	gamma_single	Phosphodiesterase 4,Homo sapiens										1.77273										1
InChI=1S/C27H29N3O5S/c31-25-17-24-22(30(25)26(32)20-8-9-20)14-16-28(24)27(33)23-7-4-15-29(23)36(34,35)21-12-10-19(11-13-21)18-5-2-1-3-6-18/h1-3,5-6,10-13,20,22-24H,4,7-9,14-17H2	5246	1	O=C(C1CCCN1S(=O)(=O)c1ccc(-c2ccccc2)cc1)N1CCC2C1CC(=O)N2C(=O)C1CC1	gamma_fused	Human herpes virus 5 capsid protein P40,Human cytomegalovirus (strain AD169) (HHV-5) (Human herpesvirus 5)										2.325										1
InChI=1S/C27H29N5O2/c33-25(12-9-20-6-2-1-3-7-20)29-22-10-11-24-21(18-22)19-28-27(30-24)31-16-13-23(14-17-31)32-15-5-4-8-26(32)34/h1-3,6-7,9-12,18-19,23H,4-5,8,13-17H2,(H,29,33)/b12-9+	5247	1	O=C(/C=C/c1ccccc1)Nc1ccc2nc(N3CCC(N4CCCCC4=O)CC3)ncc2c1	delta_single	Melanin-concentrating hormone receptor 1,Homo sapiens										1.47059										1
InChI=1S/C27H29NO2/c29-26-17-23(21-12-6-2-7-13-21)16-24-27(22-14-8-3-9-15-22)25(18-28(24)26)30-19-20-10-4-1-5-11-20/h1,3-5,8-12,14-15,17,24-25,27H,2,6-7,13,16,18-19H2	5249	1	O=C1C=C(C2=CCCCC2)CC2C(c3ccccc3)C(OCc3ccccc3)CN12	delta_fused	Neurokinin 1 receptor,Homo sapiens										1.14667										1
InChI=1S/C27H30N4O4/c32-24(16-11-19-7-3-1-4-8-19)30-22-14-12-21-13-15-23(31(21)27(22)35)26(34)29-18-25(33)28-17-20-9-5-2-6-10-20/h1-11,16,21-23H,12-15,17-18H2,(H,28,33)(H,29,34)(H,30,32)/b16-11+	5250	1	O=C(/C=C/c1ccccc1)NC1CCC2CCC(C(=O)NCC(=O)NCc3ccccc3)N2C1=O	delta_fused	Signal transducer and activator of transcription 3,Homo sapiens										9										1
InChI=1S/C27H30N6O3S/c34-26-22-16-19(9-8-18(22)17-33(26)20-10-13-28-14-11-20)30-27-29-15-12-25(32-27)31-23-6-1-2-7-24(23)37(35,36)21-4-3-5-21/h1-2,6-9,12,15-16,20-21,28H,3-5,10-11,13-14,17H2,(H2,29,30,31,32)	5251	1	O=C1c2cc(Nc3nccc(Nc4ccccc4S(=O)(=O)C4CCC4)n3)ccc2CN1C1CCNCC1	gamma_fused	ALK tyrosine kinase receptor,Homo sapiens										1.25										1
InChI=1S/C27H32N4O2/c32-26-22-18-29(21-14-8-3-9-15-21)27(33)25(22)30(17-19-10-4-1-5-11-19)24-16-23(28-31(24)26)20-12-6-2-7-13-20/h2,6-7,12-13,16,19,21H,1,3-5,8-11,14-15,17-18H2	5258	1	O=C1c2c(c(=O)n3nc(-c4ccccc4)cc3n2CC2CCCCC2)CN1C1CCCCC1	gamma_fused	Acyl coenzyme A:cholesterol acyltransferase 1,Rattus norvegicus										2.2										1
InChI=1S/C27H32N6O2S/c34-24-7-2-15-33(24)16-4-14-28-25(35)19-8-10-20(11-9-19)26-31-18-23(36-26)21-5-1-6-22(17-21)32-27-29-12-3-13-30-27/h1,3,5-6,12-13,17-20H,2,4,7-11,14-16H2,(H,28,35)(H,29,30,32)	5259	1	O=C(NCCCN1CCCC1=O)C1CCC(c2ncc(-c3cccc(Nc4ncccn4)c3)s2)CC1	gamma_single	Tyrosine-protein kinase SYK,Homo sapiens										1.1										1
InChI=1S/C27H33N3O2S/c31-26-9-5-17-30(26)18-6-14-28-27(32)23-19-22(23)20-10-12-21(13-11-20)33-25-8-2-1-7-24(25)29-15-3-4-16-29/h1-2,7-8,10-13,22-23H,3-6,9,14-19H2,(H,28,32)	5261	1	O=C(NCCCN1CCCC1=O)C1CC1c1ccc(Sc2ccccc2N2CCCC2)cc1	gamma_single	Intercellular adhesion molecule (ICAM-1), Integrin alpha-L/beta-2,Homo sapiens										1.69231										1
InChI=1S/C27H33N3O3/c31-26-18-30(15-14-19-8-10-21(11-9-19)28-17-20-6-7-20)27(32)24-16-23(12-13-25(24)29-26)33-22-4-2-1-3-5-22/h1-5,12-13,16,19-21,28H,6-11,14-15,17-18H2,(H,29,31)/p+1	5262	1	O=C1CN(CCC2CCC([NH2+]CC3CC3)CC2)C(=O)c2cc(Oc3ccccc3)ccc2N1	epsilon_fused	Ghrelin receptor,Homo sapiens										1.08824										1
InChI=1S/C27H33N3O3S/c31-26-7-3-13-30(26)14-4-12-28-27(32)23-19-22(23)20-8-10-21(11-9-20)34-25-6-2-1-5-24(25)29-15-17-33-18-16-29/h1-2,5-6,8-11,22-23H,3-4,7,12-19H2,(H,28,32)	5263	1	O=C(NCCCN1CCCC1=O)C1CC1c1ccc(Sc2ccccc2N2CCOCC2)cc1	gamma_single	Intercellular adhesion molecule (ICAM-1), Integrin alpha-L/beta-2,Homo sapiens										1.69231										1
InChI=1S/C27H34N2O2/c30-27-26-18-25(31-24-4-2-1-3-5-24)13-10-22(26)15-17-29(27)16-14-20-8-11-23(12-9-20)28-19-21-6-7-21/h1-5,10,13,18,20-21,23,28H,6-9,11-12,14-17,19H2/p+1	5264	1	O=C1c2cc(Oc3ccccc3)ccc2CCN1CCC1CCC([NH2+]CC2CC2)CC1	delta_fused	Ghrelin receptor,Homo sapiens										1.08824										1
InChI=1S/C27H34N4O2S/c32-26-7-3-15-31(26)16-4-12-29-27(33)23-19-22(23)20-8-10-21(11-9-20)34-25-6-2-1-5-24(25)30-17-13-28-14-18-30/h1-2,5-6,8-11,22-23,28H,3-4,7,12-19H2,(H,29,33)/p+1	5266	1	O=C(NCCCN1CCCC1=O)C1CC1c1ccc(Sc2ccccc2N2CC[NH2+]CC2)cc1	gamma_single	Intercellular adhesion molecule (ICAM-1), Integrin alpha-L/beta-2,Homo sapiens										1.69231										1
InChI=1S/C27H34N4O3/c32-24-19-28-14-18-31(24)25(21-7-2-1-3-8-21)26(33)29-13-6-15-30-16-11-27(12-17-30)23-10-5-4-9-22(23)20-34-27/h1-5,7-10,25,28H,6,11-20H2,(H,29,33)/p+2	5267	1	O=C(NCCC[NH+]1CCC2(CC1)OCc1ccccc12)C(c1ccccc1)N1CC[NH2+]CC1=O	delta_single	Melanin-concentrating hormone receptor 1,Homo sapiens										1.47059										1
InChI=1S/C27H36N2O/c30-26-17-6-10-21-29(26)25-16-11-15-24(22-25)27(18-7-2-8-19-27)28-20-9-5-14-23-12-3-1-4-13-23/h1,3-4,11-13,15-16,22,28H,2,5-10,14,17-21H2/p+1	5272	1	O=C1CCCCN1c1cccc(C2([NH2+]CCCCc3ccccc3)CCCCC2)c1	delta_single	Beta-secretase 1,Homo sapiens										1.15254										1
InChI=1S/C27H38N2O3/c30-27-23-31-22-20-29(27)19-8-21-32-26-15-13-25(14-16-26)12-5-7-18-28-17-6-4-11-24-9-2-1-3-10-24/h1-3,9-10,13-16,28H,4-8,11-12,17-23H2/p+1	5274	1	O=C1COCCN1CCCOc1ccc(CCCC[NH2+]CCCCc2ccccc2)cc1	delta_single	Human immunodeficiency virus type 1 protease,Human immunodeficiency virus 1										1.04878										1
InChI=1S/C27H38N4O2/c32-26-16-10-15-25(27(33)30-21-11-4-3-5-12-21)31(26)20-9-2-1-8-18-28-24-17-19-29-23-14-7-6-13-22(23)24/h6-7,13-14,17,19,21,25H,1-5,8-12,15-16,18,20H2,(H,28,29)(H,30,33)/p+1	5275	1	O=C(NC1CCCCC1)C1CCCC(=O)N1CCCCCCNc1cc[nH+]c2ccccc12	delta_single	Plasmodium falciparum,Plasmodium falciparum										2.32984										1
InChI=1S/C27H41N3O2/c31-26-11-12-27(24-9-5-2-6-10-24,22-30(26)19-23-7-3-1-4-8-23)13-14-28-20-25(21-28)29-15-17-32-18-16-29/h2,5-6,9-10,23,25H,1,3-4,7-8,11-22H2/p+2	5276	1	O=C1CCC(CC[NH+]2CC([NH+]3CCOCC3)C2)(c2ccccc2)CN1CC1CCCCC1	delta_single	Neurokinin 2 receptor,Homo sapiens										1.07143										1
InChI=1S/C27H42N4O/c32-26-11-12-27(24-9-5-2-6-10-24,22-31(26)19-23-7-3-1-4-8-23)13-16-29-20-25(21-29)30-17-14-28-15-18-30/h2,5-6,9-10,23,25,28H,1,3-4,7-8,11-22H2/p+2	5277	1	O=C1CCC(CC[NH+]2CC([NH+]3CCNCC3)C2)(c2ccccc2)CN1CC1CCCCC1	delta_single	Neurokinin 2 receptor,Homo sapiens										1.07143										1
InChI=1S/C28H18N2O/c31-28-24-6-1-2-7-25(24)29-15-21-14-20(16-30(21)28)22-12-10-19-9-8-17-4-3-5-18-11-13-23(22)27(19)26(17)18/h1-13,15-16,21H,14H2	5278	1	O=C1c2ccccc2N=CC2CC(c3ccc4ccc5cccc6ccc3c4c56)=CN12	epsilon_fused	K562,Homo sapiens										1.55462										1
InChI=1S/C28H22N2O2/c31-27-15-22(23-7-3-9-26-28(23)24-6-1-2-8-25(24)32-26)18-30(27)17-19-10-12-20(13-11-19)21-5-4-14-29-16-21/h1-14,16,22H,15,17-18H2	5281	1	O=C1CC(c2cccc3oc4ccccc4c23)CN1Cc1ccc(-c2cccnc2)cc1	gamma_single	Phosphodiesterase 10A,Homo sapiens										1.16667										1
InChI=1S/C28H22N4O2/c33-27-23-19-30(17-20-10-4-1-5-11-20)28(34)26(23)31(18-21-12-6-2-7-13-21)25-16-24(29-32(25)27)22-14-8-3-9-15-22/h1-16H,17-19H2	5284	1	O=C1c2c(c(=O)n3nc(-c4ccccc4)cc3n2Cc2ccccc2)CN1Cc1ccccc1	gamma_fused	Acyl coenzyme A:cholesterol acyltransferase 1,Rattus norvegicus										2.2										1
InChI=1S/C28H22N4O2S/c33-26(29-15-21-14-20(17-35-21)27-30-23-10-4-5-11-24(23)31-27)16-32-25-12-6-2-8-19(25)13-18-7-1-3-9-22(18)28(32)34/h1-12,14,17H,13,15-16H2,(H,29,33)(H,30,31)	5285	1	O=C(CN1C(=O)c2ccccc2Cc2ccccc21)NCc1cc(-c2nc3ccccc3[nH]2)cs1	epsilon_fused	Integrin alpha-V/beta-3,Homo sapiens										1.53846										1
InChI=1S/C28H22N4O2S/c33-26(29-16-20-13-14-25(35-20)27-30-22-10-4-5-11-23(22)31-27)17-32-24-12-6-2-8-19(24)15-18-7-1-3-9-21(18)28(32)34/h1-14H,15-17H2,(H,29,33)(H,30,31)	5286	1	O=C(CN1C(=O)c2ccccc2Cc2ccccc21)NCc1ccc(-c2nc3ccccc3[nH]2)s1	epsilon_fused	Integrin alpha-V/beta-3,Homo sapiens										1.53846										1
InChI=1S/C28H23N3O4/c32-25-15-30(14-17-6-2-1-3-7-17)28(33)22-13-20-19-8-4-5-9-21(19)29-26(20)27(31(22)25)18-10-11-23-24(12-18)35-16-34-23/h1-12,22,27,29H,13-16H2	5288	1	O=C1C2Cc3c([nH]c4ccccc34)C(c3ccc4c(c3)OCO4)N2C(=O)CN1Cc1ccccc1	delta_fused	Phosphodiesterase 5A,Bos taurus										1.25										1
InChI=1S/C28H24N4O2/c33-27-26(30-22-6-2-1-3-7-22)31-25(17-29-27)21-5-4-8-23(16-21)32-14-13-20-15-19(18-9-10-18)11-12-24(20)28(32)34/h1-8,11-12,15-18H,9-10,13-14H2,(H,29,33)(H,30,31)	5292	1	O=C1c2ccc(C3CC3)cc2CCN1c1cccc(-c2c[nH]c(=O)c(Nc3ccccc3)n2)c1	delta_fused	Tyrosine-protein kinase BTK,Homo sapiens										1.07317										1
InChI=1S/C28H24N4O3S/c33-26-24-15-20-5-4-14-29-25(20)16-21(24)18-32(26)22-10-8-19(9-11-22)17-28(12-13-28)30-27(34)31-36(35)23-6-2-1-3-7-23/h1-11,14-16,36H,12-13,17-18H2,(H,30,34)	5294	1	O=C(N=[SH](=O)c1ccccc1)NC1(Cc2ccc(N3Cc4cc5ncccc5cc4C3=O)cc2)CC1	gamma_fused	Prostanoid EP4 receptor,Homo sapiens										1.38095										1
InChI=1S/C28H25N3O6/c32-23(25(33)29-17-19-7-3-1-4-8-19)18-30-28(36)37-24-15-16-31(27(24)35)26(34)22-13-11-21(12-14-22)20-9-5-2-6-10-20/h1-14,24H,15-18H2,(H,29,33)(H,30,36)	5296	1	O=C(NCC(=O)C(=O)NCc1ccccc1)OC1CCN(C(=O)c2ccc(-c3ccccc3)cc2)C1=O	gamma_single	Cathepsin K,Homo sapiens										1.20588										1
InChI=1S/C28H25N3O7/c32-23(25(33)29-17-19-7-3-1-4-8-19)18-30-27(35)38-24-15-16-31(26(24)34)28(36)37-22-13-11-21(12-14-22)20-9-5-2-6-10-20/h1-14,24H,15-18H2,(H,29,33)(H,30,35)	5297	1	O=C(NCC(=O)C(=O)NCc1ccccc1)OC1CCN(C(=O)Oc2ccc(-c3ccccc3)cc2)C1=O	gamma_single	Cathepsin K,Homo sapiens										1.20588										1
InChI=1S/C28H26N2O2/c31-27-18-17-26(30(27)21-25-9-5-2-6-10-25)28(32)29-20-19-24-15-13-23(14-16-24)12-11-22-7-3-1-4-8-22/h1-10,13-16,26H,17-21H2,(H,29,32)	5300	1	O=C(NCCc1ccc(C#Cc2ccccc2)cc1)C1CCC(=O)N1Cc1ccccc1	gamma_single	Integrin alpha-4/beta-1,Homo sapiens										1.21818										1
InChI=1S/C28H26N2O2/c31-28-17-6-7-18-30(28)24-13-8-12-23(20-24)29-19-9-15-26(29)25-14-4-5-16-27(25)32-21-22-10-2-1-3-11-22/h1-5,8-16,19-20H,6-7,17-18,21H2	5301	1	O=C1CCCCN1c1cccc(-n2cccc2-c2ccccc2OCc2ccccc2)c1	delta_single	Prostanoid EP1 receptor,Homo sapiens										5										1
InChI=1S/C28H26N2O2S/c31-27-20-29(28(32)26-17-23-13-7-8-14-25(23)33-26)19-24(16-15-21-9-3-1-4-10-21)30(27)18-22-11-5-2-6-12-22/h1-14,17,24H,15-16,18-20H2	5302	1	O=C(c1cc2ccccc2s1)N1CC(=O)N(Cc2ccccc2)C(CCc2ccccc2)C1	delta_single	Lassa virus,Lassa virus										2.8										1
InChI=1S/C28H26N4O/c33-27-28(14-18-31(19-15-28)20-26-29-16-17-30-26)24-8-4-5-9-25(24)32(27)23-12-10-22(11-13-23)21-6-2-1-3-7-21/h1-13,16-17H,14-15,18-20H2,(H,29,30)/p+1	5305	1	O=C1N(c2ccc(-c3ccccc3)cc2)c2ccccc2C12CC[NH+](Cc1ncc[nH]1)CC2	gamma_fused	Egl nine homolog 1,Homo sapiens										1.92										1
InChI=1S/C28H26N4O/c33-28-27(31-20-19-30-25-17-18-29-24-14-8-7-13-23(24)25)26(16-15-21-9-3-1-4-10-21)32(28)22-11-5-2-6-12-22/h1-18,26-27,31H,19-20H2,(H,29,30)/p+2/b16-15+	5306	1	O=C1C([NH2+]CCNc2cc[nH+]c3ccccc23)C(/C=C/c2ccccc2)N1c1ccccc1	beta_single	Plasmodium falciparum,Plasmodium falciparum										2.32984										1
InChI=1S/C28H26N4O2/c33-27-28(14-18-31(19-15-28)20-26-29-16-17-30-26)24-8-4-5-9-25(24)32(27)21-10-12-23(13-11-21)34-22-6-2-1-3-7-22/h1-13,16-17H,14-15,18-20H2,(H,29,30)/p+1	5307	1	O=C1N(c2ccc(Oc3ccccc3)cc2)c2ccccc2C12CC[NH+](Cc1ncc[nH]1)CC2	gamma_fused	Egl nine homolog 1,Homo sapiens										1.92										1
InChI=1S/C28H26N4O2/c33-28-27-22(18-26(34-27)20-6-2-1-3-7-20)16-21-17-24(31-14-12-29-13-15-31)9-10-25(21)32(28)19-23-8-4-5-11-30-23/h1-11,17-18,29H,12-16,19H2/p+1	5308	1	O=C1c2oc(-c3ccccc3)cc2Cc2cc(N3CC[NH2+]CC3)ccc2N1Cc1ccccn1	epsilon_fused	MAP kinase-activated protein kinase 2,Homo sapiens										1.3125										1
InChI=1S/C28H26N4O3/c33-24(19-12-9-13-19)18-32-23-17-8-7-16-22(23)25(20-10-3-1-4-11-20)30-26(27(32)34)31-28(35)29-21-14-5-2-6-15-21/h1-8,10-11,14-17,19,26H,9,12-13,18H2,(H2,29,31,35)	5310	1	O=C(Nc1ccccc1)NC1N=C(c2ccccc2)c2ccccc2N(CC(=O)C2CCC2)C1=O	epsilon_fused	Cholecystokinin B receptor,Rattus norvegicus										1.64706										1
InChI=1S/C28H26N8O3/c37-25-23-4-2-1-3-21(23)18-36(25)19-28(26(38)32-27(39)33-28)8-7-22-6-5-20(15-31-22)17-34-11-13-35(14-12-34)24-16-29-9-10-30-24/h1-6,9-10,15-16H,11-14,17-19H2,(H2,32,33,38,39)/p+1	5313	1	O=C1NC(=O)C(C#Cc2ccc(C[NH+]3CCN(c4cnccn4)CC3)cn2)(CN2Cc3ccccc3C2=O)N1	gamma_fused	TNF-alpha,Homo sapiens										1.40099										1
InChI=1S/C28H27N3O2/c32-26(31-18-17-30(27(33)20-31)19-21-9-3-1-4-10-21)16-15-24-23-13-7-8-14-25(23)29-28(24)22-11-5-2-6-12-22/h1-14,29H,15-20H2	5314	1	O=C(CCc1c(-c2ccccc2)[nH]c2ccccc12)N1CCN(Cc2ccccc2)C(=O)C1	delta_single	Neurokinin 1 receptor,Homo sapiens										1.14667										1
InChI=1S/C28H27N5O2S/c34-27-23(30-25-14-22(31-32-25)16-8-9-16)13-18(15-29-27)17-4-3-5-19(12-17)33-11-10-21-20-6-1-2-7-24(20)36-26(21)28(33)35/h3-5,12-16H,1-2,6-11H2,(H,29,34)(H2,30,31,32)	5318	1	O=C1c2sc3c(c2CCN1c1cccc(-c2c[nH]c(=O)c(Nc4cc(C5CC5)n[nH]4)c2)c1)CCCC3	delta_fused	Tyrosine-protein kinase BTK,Homo sapiens										1.07317										1
InChI=1S/C28H27N5O4/c34-24(31-17-9-10-18-31)19-32-22-15-7-8-16-23(22)33(21-13-5-2-6-14-21)27(36)25(26(32)35)30-28(37)29-20-11-3-1-4-12-20/h1-8,11-16,25H,9-10,17-19H2,(H2,29,30,37)	5319	1	O=C(Nc1ccccc1)NC1C(=O)N(CC(=O)N2CCCC2)c2ccccc2N(c2ccccc2)C1=O	epsilon_fused	Rattus norvegicus,Rattus norvegicus										2.39726										1
InChI=1S/C28H27NO2/c30-26-19-23-13-7-8-14-25(23)27(20-9-3-1-4-10-20)29(26)24-17-15-22(16-18-24)28(31)21-11-5-2-6-12-21/h1-14,22,24,27H,15-19H2	5322	1	O=C(c1ccccc1)C1CCC(N2C(=O)Cc3ccccc3C2c2ccccc2)CC1	delta_fused	p53-binding protein Mdm-2,Homo sapiens										1.24174										1
InChI=1S/C28H28N2O2/c31-26-19-22-13-7-8-14-25(22)27(20-9-3-1-4-10-20)30(26)24-17-15-23(16-18-24)29-28(32)21-11-5-2-6-12-21/h1,3-4,7-10,13-18,21,27H,2,5-6,11-12,19H2,(H,29,32)	5324	1	O=C(Nc1ccc(N2C(=O)Cc3ccccc3C2c2ccccc2)cc1)C1CCCCC1	delta_fused	p53-binding protein Mdm-2,Homo sapiens										1.24174										1
InChI=1S/C28H28N2O2/c31-27-18-17-26(30(27)21-25-9-5-2-6-10-25)28(32)29-20-19-24-15-13-23(14-16-24)12-11-22-7-3-1-4-8-22/h1-16,26H,17-21H2,(H,29,32)/b12-11+	5325	1	O=C(NCCc1ccc(/C=C/c2ccccc2)cc1)C1CCC(=O)N1Cc1ccccc1	gamma_single	Integrin alpha-4/beta-1,Homo sapiens										1.21818										1
InChI=1S/C28H28N2O2/c31-27-18-24(19-30(27)26-13-7-8-14-26)28(32)29-25-16-22(20-9-3-1-4-10-20)15-23(17-25)21-11-5-2-6-12-21/h1-6,9-12,15-17,24,26H,7-8,13-14,18-19H2,(H,29,32)	5326	1	O=C(Nc1cc(-c2ccccc2)cc(-c2ccccc2)c1)C1CC(=O)N(C2CCCC2)C1	gamma_single	Enoyl-[acyl-carrier-protein] reductase,Mycobacterium tuberculosis										2.65789										1
InChI=1S/C28H28N4O2/c33-27-23-19-31(22-14-8-3-9-15-22)28(34)26(23)30(17-16-20-10-4-1-5-11-20)25-18-24(29-32(25)27)21-12-6-2-7-13-21/h1-2,4-7,10-13,18,22H,3,8-9,14-17,19H2	5329	1	O=C1c2c(c(=O)n3nc(-c4ccccc4)cc3n2CCc2ccccc2)CN1C1CCCCC1	gamma_fused	Acyl coenzyme A:cholesterol acyltransferase 1,Rattus norvegicus										2.2										1
InChI=1S/C28H28N6O2/c35-27-23(30-26-15-22(31-32-26)17-8-9-17)13-20(16-29-27)18-5-3-6-21(12-18)33-10-11-34-24-7-2-1-4-19(24)14-25(34)28(33)36/h3,5-6,12-17H,1-2,4,7-11H2,(H,29,35)(H2,30,31,32)	5331	1	O=C1c2cc3c(n2CCN1c1cccc(-c2c[nH]c(=O)c(Nc4cc(C5CC5)n[nH]4)c2)c1)CCCC3	delta_fused	Tyrosine-protein kinase BTK,Homo sapiens										1.07317										1
InChI=1S/C28H28N6O3/c35-27-24(30-26-15-22-17-37-11-10-34(22)31-26)13-19(16-29-27)18-4-3-6-20(12-18)33-9-7-25-23(28(33)36)14-21-5-1-2-8-32(21)25/h3-4,6,12-16H,1-2,5,7-11,17H2,(H,29,35)(H,30,31)	5332	1	O=C1c2cc3n(c2CCN1c1cccc(-c2c[nH]c(=O)c(Nc4cc5n(n4)CCOC5)c2)c1)CCCC3	delta_fused	Tyrosine-protein kinase BTK,Homo sapiens										1.07317										1
InChI=1S/C28H28N6O3S/c35-25-18-33(12-11-32(25)16-21-7-3-1-4-8-21)26(36)19-34-17-24(13-23-14-29-30-15-23)27(37)31-28(34)38-20-22-9-5-2-6-10-22/h1-10,14-15,17H,11-13,16,18-20H2,(H,29,30)	5333	1	O=C(Cn1cc(Cc2cn[nH]c2)c(=O)nc1SCc1ccccc1)N1CCN(Cc2ccccc2)C(=O)C1	delta_single	LDL-associated phospholipase A2,Homo sapiens										2										1
InChI=1S/C28H29N5O2/c34-26(29-16-8-1-9-17-30-28-31-23-13-5-6-14-24(23)32-28)19-33-25-15-7-3-11-21(25)18-20-10-2-4-12-22(20)27(33)35/h2-7,10-15H,1,8-9,16-19H2,(H,29,34)(H2,30,31,32)	5337	1	O=C(CN1C(=O)c2ccccc2Cc2ccccc21)NCCCCCNc1nc2ccccc2[nH]1	epsilon_fused	Integrin alpha-V/beta-3,Homo sapiens										1.53846										1
InChI=1S/C28H29N5O3/c34-25-24-4-2-1-3-22(24)18-33(25)19-28(26(35)29-27(36)30-28)12-11-20-5-7-21(8-6-20)17-31-13-15-32(16-14-31)23-9-10-23/h1-8,23H,9-10,13-19H2,(H2,29,30,35,36)/p+2	5338	1	O=C1NC(=O)C(C#Cc2ccc(C[NH+]3CC[NH+](C4CC4)CC3)cc2)(CN2Cc3ccccc3C2=O)N1	gamma_fused	TNF-alpha,Homo sapiens										1.40099										1
InChI=1S/C28H29N7O2/c36-26-6-2-4-14-35(26)21-10-15-34(16-11-21)27(37)25-18-19-17-20(7-8-22(19)32-25)31-28-30-13-9-24(33-28)23-5-1-3-12-29-23/h1,3,5,7-9,12-13,17-18,21,32H,2,4,6,10-11,14-16H2,(H,30,31,33)	5339	1	O=C(c1cc2cc(Nc3nccc(-c4ccccn4)n3)ccc2[nH]1)N1CCC(N2CCCCC2=O)CC1	delta_single	Tyrosine-protein kinase SYK,Homo sapiens										1.1										1
InChI=1S/C28H29N7O2/c36-27-23(31-26-15-22-17-29-8-9-35(22)32-26)13-20(16-30-27)18-5-3-6-21(12-18)33-10-11-34-24-7-2-1-4-19(24)14-25(34)28(33)37/h3,5-6,12-16,29H,1-2,4,7-11,17H2,(H,30,36)(H,31,32)	5340	1	O=C1c2cc3c(n2CCN1c1cccc(-c2c[nH]c(=O)c(Nc4cc5n(n4)CCNC5)c2)c1)CCCC3	delta_fused	Tyrosine-protein kinase BTK,Homo sapiens										1.07317										1
InChI=1S/C28H30N2O2/c31-27-18-17-26(30(27)21-25-9-5-2-6-10-25)28(32)29-20-19-24-15-13-23(14-16-24)12-11-22-7-3-1-4-8-22/h1-10,13-16,26H,11-12,17-21H2,(H,29,32)	5343	1	O=C(NCCc1ccc(CCc2ccccc2)cc1)C1CCC(=O)N1Cc1ccccc1	gamma_single	Integrin alpha-4/beta-1,Homo sapiens										1.21818										1
InChI=1S/C28H30N2O2/c31-27-28(20-22-13-16-29-17-14-22,15-18-30(27)21-23-7-2-1-3-8-23)24-9-6-12-26(19-24)32-25-10-4-5-11-25/h1-3,6-9,12-14,16-17,19,25H,4-5,10-11,15,18,20-21H2	5344	1	O=C1N(Cc2ccccc2)CCC1(Cc1ccncc1)c1cccc(OC2CCCC2)c1	gamma_single	Phosphodiesterase 4,Homo sapiens										1.77273										1
InChI=1S/C28H30N2O3S/c31-28-13-7-8-18-29(28)19-20-30(27-21-26(27)24-11-5-2-6-12-24)34(32,33)25-16-14-23(15-17-25)22-9-3-1-4-10-22/h1-6,9-12,14-17,26-27H,7-8,13,18-21H2	5346	1	O=C1CCCCN1CCN(C1CC1c1ccccc1)S(=O)(=O)c1ccc(-c2ccccc2)cc1	delta_single	ADAMTS5,Homo sapiens										2.125										1
InChI=1S/C28H30N4O3/c33-26-25(19-21-7-3-1-4-8-21)27(32(26)28(34)30-20-22-9-5-2-6-10-22)35-24-13-11-23(12-14-24)31-17-15-29-16-18-31/h1-14,25,27,29H,15-20H2,(H,30,34)/p+1	5347	1	O=C(NCc1ccccc1)N1C(=O)C(Cc2ccccc2)C1Oc1ccc(N2CC[NH2+]CC2)cc1	beta_single	Chymase,Homo sapiens										1.48387										1
InChI=1S/C28H30N4O4/c33-25-17-24-22(32(25)26(34)20-8-9-20)14-16-30(24)27(35)23-7-4-15-31(23)28(36)29-21-12-10-19(11-13-21)18-5-2-1-3-6-18/h1-3,5-6,10-13,20,22-24H,4,7-9,14-17H2,(H,29,36)	5348	1	O=C(Nc1ccc(-c2ccccc2)cc1)N1CCCC1C(=O)N1CCC2C1CC(=O)N2C(=O)C1CC1	gamma_fused	Human herpes virus 5 capsid protein P40,Human cytomegalovirus (strain AD169) (HHV-5) (Human herpesvirus 5)										2.325										1
InChI=1S/C28H30N4O5S/c33-26-9-3-8-25-22-13-19(16-32(25)26)15-31(17-22)27(34)18-30-12-4-7-24(28(30)35)29-38(36,37)23-11-10-20-5-1-2-6-21(20)14-23/h1-3,5-6,8-11,14,19,22,24,29H,4,7,12-13,15-18H2	5349	1	O=C(CN1CCCC(NS(=O)(=O)c2ccc3ccccc3c2)C1=O)N1CC2CC(C1)c1cccc(=O)n1C2	delta_single	Coagulation factor X,Homo sapiens										1.67391										1
InChI=1S/C28H30N8O3/c37-26-2-1-11-35(26)14-15-39-21-5-7-30-24(18-21)23-6-8-31-28(34-23)32-20-3-4-22-19(16-20)17-25(33-22)27(38)36-12-9-29-10-13-36/h3-8,16-18,29,33H,1-2,9-15H2,(H,31,32,34)/p+1	5350	1	O=C1CCCN1CCOc1ccnc(-c2ccnc(Nc3ccc4[nH]c(C(=O)N5CC[NH2+]CC5)cc4c3)n2)c1	gamma_single	Tyrosine-protein kinase SYK,Homo sapiens										1.1										1
InChI=1S/C28H32N4O4S/c33-27(30-15-16-31-37(35,36)26-7-3-5-21-4-1-2-6-24(21)26)22-8-9-23-19-32(28(34)25(23)18-22)17-12-20-10-13-29-14-11-20/h1-9,18,20,29,31H,10-17,19H2,(H,30,33)/p+1	5351	1	O=C(NCCNS(=O)(=O)c1cccc2ccccc12)c1ccc2c(c1)C(=O)N(CCC1CC[NH2+]CC1)C2	gamma_fused	Homo sapiens,Homo sapiens										1.31944										1
InChI=1S/C28H32N6O5S/c35-26(33-14-19-10-20(15-33)17-34(16-19)27(36)23-12-29-30-13-23)18-32-9-3-6-25(28(32)37)31-40(38,39)24-8-7-21-4-1-2-5-22(21)11-24/h1-2,4-5,7-8,11-13,19-20,25,31H,3,6,9-10,14-18H2,(H,29,30)	5353	1	O=C(CN1CCCC(NS(=O)(=O)c2ccc3ccccc3c2)C1=O)N1CC2CC(C1)CN(C(=O)c1cn[nH]c1)C2	delta_single	Coagulation factor X,Homo sapiens										1.67391										1
InChI=1S/C28H33N5O4/c34-24(31-17-9-10-18-31)19-32-22-15-7-8-16-23(22)33(21-13-5-2-6-14-21)27(36)25(26(32)35)30-28(37)29-20-11-3-1-4-12-20/h1,3-4,7-8,11-12,15-16,21,25H,2,5-6,9-10,13-14,17-19H2,(H2,29,30,37)	5355	1	O=C(Nc1ccccc1)NC1C(=O)N(CC(=O)N2CCCC2)c2ccccc2N(C2CCCCC2)C1=O	epsilon_fused	Rattus norvegicus,Rattus norvegicus										2.39726										1
InChI=1S/C28H34N4O/c33-28-27(30-17-26-16-29-21-32(26)19-23-11-5-2-6-12-23)15-24-13-7-8-14-25(24)20-31(28)18-22-9-3-1-4-10-22/h2,5-8,11-14,16,21-22,27,30H,1,3-4,9-10,15,17-20H2/p+1	5356	1	O=C1C([NH2+]Cc2cncn2Cc2ccccc2)Cc2ccccc2CN1CC1CCCCC1	epsilon_fused	Protein farnesyltransferase,Homo sapiens										1.36765										1
InChI=1S/C28H35N3O2/c32-26-12-11-25(31(26)21-22-7-2-1-3-8-22)27(33)29-17-6-18-30-19-15-28(16-20-30)14-13-23-9-4-5-10-24(23)28/h1-5,7-10,25H,6,11-21H2,(H,29,33)/p+1	5359	1	O=C(NCCC[NH+]1CCC2(CCc3ccccc32)CC1)C1CCC(=O)N1Cc1ccccc1	gamma_single	Nociceptin receptor,Homo sapiens										1.22222										1
InChI=1S/C28H36N2O/c31-27-23-15-16-26(20-23)30(27)25-14-9-13-24(21-25)28(17-6-2-7-18-28)29-19-8-5-12-22-10-3-1-4-11-22/h1,3-4,9-11,13-14,21,23,26,29H,2,5-8,12,15-20H2/p+1	5363	1	O=C1C2CCC(C2)N1c1cccc(C2([NH2+]CCCCc3ccccc3)CCCCC2)c1	gamma_fused	Beta-secretase 1,Homo sapiens										1.15254										1
InChI=1S/C28H36N2O2/c31-27-28(20-22-13-16-29-17-14-22,15-18-30(27)21-23-7-2-1-3-8-23)24-9-6-12-26(19-24)32-25-10-4-5-11-25/h6,9,12-14,16-17,19,23,25H,1-5,7-8,10-11,15,18,20-21H2	5364	1	O=C1N(CC2CCCCC2)CCC1(Cc1ccncc1)c1cccc(OC2CCCC2)c1	gamma_single	Phosphodiesterase 4,Homo sapiens										1.77273										1
InChI=1S/C28H37N5O3/c34-27-21-36-26-8-4-3-7-25(26)33(27)20-19-31-14-9-22(10-15-31)23-5-1-2-6-24(23)28(35)30-13-18-32-16-11-29-12-17-32/h1-8,22,29H,9-21H2,(H,30,35)/p+2	5365	1	O=C(NCC[NH+]1CCNCC1)c1ccccc1C1CC[NH+](CCN2C(=O)COc3ccccc32)CC1	delta_fused	Urotensin II receptor,Rattus norvegicus										1.29167										1
InChI=1S/C28H41N3O2/c32-26-12-16-30(17-13-26)25-20-29(21-25)18-15-28(24-9-5-2-6-10-24)14-11-27(33)31(22-28)19-23-7-3-1-4-8-23/h2,5-6,9-10,23,25H,1,3-4,7-8,11-22H2/p+2	5367	1	O=C1CC[NH+](C2C[NH+](CCC3(c4ccccc4)CCC(=O)N(CC4CCCCC4)C3)C2)CC1	delta_single	Neurokinin 2 receptor,Homo sapiens										1.07143										1
InChI=1S/C28H42N2O/c31-27-28(17-19-29(20-18-28)21-23-11-5-2-1-3-6-12-23)25-15-9-10-16-26(25)30(27)22-24-13-7-4-8-14-24/h9-10,15-16,23-24H,1-8,11-14,17-22H2/p+1	5368	1	O=C1N(CC2CCCCC2)c2ccccc2C12CC[NH+](CC1CCCCCCC1)CC2	gamma_fused	Nociceptin receptor,Homo sapiens										1.22222										1
InChI=1S/C29H23N3O4/c33-25-13-7-12-24-27(25)26(29(35)31(24)19-8-3-1-4-9-19)23-18-30-32(28(23)34)20-14-16-22(17-15-20)36-21-10-5-2-6-11-21/h1-6,8-11,14-18,26,30H,7,12-13H2	5373	1	O=C1CCCC2=C1C(c1c[nH]n(-c3ccc(Oc4ccccc4)cc3)c1=O)C(=O)N2c1ccccc1	gamma_fused	Elongation of very long chain fatty acids protein 6,Homo sapiens										1.36										1
InChI=1S/C29H23N5O2/c35-27(18-34-26-12-6-2-8-21(26)15-20-7-1-3-9-22(20)29(34)36)31-17-19-13-14-25(30-16-19)28-32-23-10-4-5-11-24(23)33-28/h1-14,16H,15,17-18H2,(H,31,35)(H,32,33)	5374	1	O=C(CN1C(=O)c2ccccc2Cc2ccccc21)NCc1ccc(-c2nc3ccccc3[nH]2)nc1	epsilon_fused	Integrin alpha-V/beta-3,Homo sapiens										1.53846										1
InChI=1S/C29H24N2O/c32-29-26(20-22-12-4-1-5-13-22)30-28(24-16-8-3-9-17-24)25-18-10-11-19-27(25)31(29)21-23-14-6-2-7-15-23/h1-19,26H,20-21H2	5376	1	O=C1C(Cc2ccccc2)N=C(c2ccccc2)c2ccccc2N1Cc1ccccc1	epsilon_fused	Trypanosoma brucei brucei,Trypanosoma brucei brucei										3										1
InChI=1S/C29H24N6O6S/c36-25(21-13-7-8-14-22(21)41-20-11-5-2-6-12-20)30-23-26(37)35-24(28(38)40-15-18-9-3-1-4-10-18)19(16-39-27(23)35)17-42-29-31-33-34-32-29/h1-14,23,27H,15-17H2,(H,30,36)(H,31,32,33,34)	5379	1	O=C(OCc1ccccc1)C1=C(CSc2nnn[nH]2)COC2C(NC(=O)c3ccccc3Oc3ccccc3)C(=O)N12	beta_fused	Chymase,Homo sapiens										1.48387										1
InChI=1S/C29H25N3O2/c33-27(17-24-7-3-4-14-30-24)31-29(12-13-29)18-20-8-10-25(11-9-20)32-19-23-15-21-5-1-2-6-22(21)16-26(23)28(32)34/h1-11,14-16H,12-13,17-19H2,(H,31,33)	5380	1	O=C(Cc1ccccn1)NC1(Cc2ccc(N3Cc4cc5ccccc5cc4C3=O)cc2)CC1	gamma_fused	Prostanoid EP4 receptor,Homo sapiens										1.38095										1
InChI=1S/C29H26N4O/c34-28-29(14-18-32(19-15-29)21-24-7-3-4-17-31-24)26-8-1-2-9-27(26)33(28)25-12-10-22(11-13-25)23-6-5-16-30-20-23/h1-13,16-17,20H,14-15,18-19,21H2/p+1	5386	1	O=C1N(c2ccc(-c3cccnc3)cc2)c2ccccc2C12CC[NH+](Cc1ccccn1)CC2	gamma_fused	Egl nine homolog 1,Homo sapiens										1.92										1
InChI=1S/C29H26N4O/c34-28-29(15-19-32(20-16-29)21-23-7-3-5-17-30-23)25-8-1-2-10-27(25)33(28)24-13-11-22(12-14-24)26-9-4-6-18-31-26/h1-14,17-18H,15-16,19-21H2/p+1	5387	1	O=C1N(c2ccc(-c3ccccn3)cc2)c2ccccc2C12CC[NH+](Cc1ccccn1)CC2	gamma_fused	Egl nine homolog 1,Homo sapiens										1.92										1
InChI=1S/C29H26N4O/c34-28-29(15-19-32(20-16-29)21-24-9-4-5-17-30-24)26-10-6-18-31-27(26)33(28)25-13-11-23(12-14-25)22-7-2-1-3-8-22/h1-14,17-18H,15-16,19-21H2/p+1	5388	1	O=C1N(c2ccc(-c3ccccc3)cc2)c2ncccc2C12CC[NH+](Cc1ccccn1)CC2	gamma_fused	Egl nine homolog 1,Homo sapiens										1.92										1
InChI=1S/C29H26N4O/c34-28-29(15-19-32(20-16-29)21-24-9-4-5-17-30-24)27-26(10-6-18-31-27)33(28)25-13-11-23(12-14-25)22-7-2-1-3-8-22/h1-14,17-18H,15-16,19-21H2/p+1	5389	1	O=C1N(c2ccc(-c3ccccc3)cc2)c2cccnc2C12CC[NH+](Cc1ccccn1)CC2	gamma_fused	Egl nine homolog 1,Homo sapiens										1.92										1
InChI=1S/C29H26N4O3/c34-25(20-9-5-2-6-10-20)17-32-26-15-23(19-7-3-1-4-8-19)30-33(26)28(35)22-16-31(29(36)27(22)32)24-14-18-11-12-21(24)13-18/h1-10,15,18,21,24H,11-14,16-17H2	5390	1	O=C(Cn1c2c(c(=O)n3nc(-c4ccccc4)cc13)CN(C1CC3CCC1C3)C2=O)c1ccccc1	gamma_fused	Acyl coenzyme A:cholesterol acyltransferase 1,Rattus norvegicus										2.2										1
InChI=1S/C29H27N3O2/c33-29-28-24(19-27(34-28)22-9-5-2-6-10-22)17-23-18-25(31-15-13-30-14-16-31)11-12-26(23)32(29)20-21-7-3-1-4-8-21/h1-12,18-19,30H,13-17,20H2/p+1	5393	1	O=C1c2oc(-c3ccccc3)cc2Cc2cc(N3CC[NH2+]CC3)ccc2N1Cc1ccccc1	epsilon_fused	MAP kinase-activated protein kinase 2,Homo sapiens										1.3125										1
InChI=1S/C29H27N3O7/c33-24(26(34)30-17-20-7-3-1-4-8-20)18-31-28(36)39-25-15-16-32(27(25)35)29(37)38-19-21-11-13-23(14-12-21)22-9-5-2-6-10-22/h1-14,25H,15-19H2,(H,30,34)(H,31,36)	5394	1	O=C(NCC(=O)C(=O)NCc1ccccc1)OC1CCN(C(=O)OCc2ccc(-c3ccccc3)cc2)C1=O	gamma_single	Cathepsin K,Homo sapiens										1.20588										1
InChI=1S/C29H27N5O2/c35-28-27(26(16-15-21-9-3-1-4-10-21)34(28)22-11-5-2-6-12-22)33-29(36)32-20-19-31-25-17-18-30-24-14-8-7-13-23(24)25/h1-18,26-27H,19-20H2,(H,30,31)(H2,32,33,36)/p+1/b16-15+	5395	1	O=C(NCCNc1cc[nH+]c2ccccc12)NC1C(=O)N(c2ccccc2)C1/C=C/c1ccccc1	beta_single	Plasmodium falciparum,Plasmodium falciparum										2.32984										1
InChI=1S/C29H27N5O2S/c35-28-27(32-20-9-7-17(8-10-20)19-14-30-15-19)33-24(16-31-28)18-3-1-4-21(13-18)34-12-11-23-22-5-2-6-25(22)37-26(23)29(34)36/h1,3-4,7-10,13,16,19,30H,2,5-6,11-12,14-15H2,(H,31,35)(H,32,33)/p+1	5396	1	O=C1c2sc3c(c2CCN1c1cccc(-c2c[nH]c(=O)c(Nc4ccc(C5C[NH2+]C5)cc4)n2)c1)CCC3	delta_fused	Tyrosine-protein kinase BTK,Homo sapiens										1.07317										1
InChI=1S/C29H27N7O3/c37-26-24-6-2-1-4-21(24)18-35(26)19-29(27(38)33-28(39)34-29)12-9-20-7-8-25(32-16-20)36(22-10-14-30-15-11-22)23-5-3-13-31-17-23/h1-8,13,16-17,22,30H,10-11,14-15,18-19H2,(H2,33,34,38,39)/p+1	5397	1	O=C1NC(=O)C(C#Cc2ccc(N(c3cccnc3)C3CC[NH2+]CC3)nc2)(CN2Cc3ccccc3C2=O)N1	gamma_fused	TNF-alpha,Homo sapiens										1.40099										1
InChI=1S/C29H27N7O3/c37-26-25-4-2-1-3-22(25)18-36(26)20-29(27(38)32-28(39)33-29)10-7-21-5-6-23(31-17-21)19-34-13-15-35(16-14-34)24-8-11-30-12-9-24/h1-6,8-9,11-12,17H,13-16,18-20H2,(H2,32,33,38,39)/p+2	5398	1	O=C1NC(=O)C(C#Cc2ccc(C[NH+]3CCN(c4cc[nH+]cc4)CC3)nc2)(CN2Cc3ccccc3C2=O)N1	gamma_fused	TNF-alpha,Homo sapiens										1.40099										1
InChI=1S/C29H27N9O4/c39-24(36-15-6-7-16-36)18-37-22-13-4-5-14-23(22)38(21-11-2-1-3-12-21)28(41)25(27(37)40)31-29(42)30-20-10-8-9-19(17-20)26-32-34-35-33-26/h1-5,8-14,17,25-26H,6-7,15-16,18H2,(H2,30,31,42)	5399	1	O=C(Nc1cccc(C2N=NN=N2)c1)NC1C(=O)N(CC(=O)N2CCCC2)c2ccccc2N(c2ccccc2)C1=O	epsilon_fused	Rattus norvegicus,Rattus norvegicus										2.39726										1
InChI=1S/C29H28N2O5/c32-26(35-19-22-12-6-2-7-13-22)18-30-24(17-16-21-10-4-1-5-11-21)27(28(30)33)31-25(20-36-29(31)34)23-14-8-3-9-15-23/h1-15,24-25,27H,16-20H2	5400	1	O=C(CN1C(=O)C(N2C(=O)OCC2c2ccccc2)C1CCc1ccccc1)OCc1ccccc1	beta_single	Vasopressin V1a receptor,Homo sapiens										1.76471										1
InChI=1S/C29H28N4O2/c34-28-24-20-32(23-16-8-3-9-17-23)29(35)27(24)31(18-10-13-21-11-4-1-5-12-21)26-19-25(30-33(26)28)22-14-6-2-7-15-22/h1-2,4-7,10-15,19,23H,3,8-9,16-18,20H2/b13-10+	5402	1	O=C1c2c(c(=O)n3nc(-c4ccccc4)cc3n2C/C=C/c2ccccc2)CN1C1CCCCC1	gamma_fused	Acyl coenzyme A:cholesterol acyltransferase 1,Rattus norvegicus										2.2										1
InChI=1S/C29H28N6O2/c36-28-24(33-27-8-7-20(16-31-27)22-14-30-15-22)12-21(17-32-28)18-3-1-5-23(11-18)34-9-10-35-25-6-2-4-19(25)13-26(35)29(34)37/h1,3,5,7-8,11-13,16-17,22,30H,2,4,6,9-10,14-15H2,(H,31,33)(H,32,36)/p+1	5404	1	O=C1c2cc3c(n2CCN1c1cccc(-c2c[nH]c(=O)c(Nc4ccc(C5C[NH2+]C5)cn4)c2)c1)CCC3	delta_fused	Tyrosine-protein kinase BTK,Homo sapiens										1.07317										1
InChI=1S/C29H28N6O2/c36-28-24(33-27-8-7-20-16-30-10-9-23(20)32-27)14-21(17-31-28)18-3-1-5-22(13-18)34-11-12-35-25-6-2-4-19(25)15-26(35)29(34)37/h1,3,5,7-8,13-15,17,30H,2,4,6,9-12,16H2,(H,31,36)(H,32,33)/p+1	5405	1	O=C1c2cc3c(n2CCN1c1cccc(-c2c[nH]c(=O)c(Nc4ccc5c(n4)CC[NH2+]C5)c2)c1)CCC3	delta_fused	Tyrosine-protein kinase BTK,Homo sapiens										1.07317										1
InChI=1S/C29H28N6O3/c36-28-25(33-27-9-8-23(19-31-27)34-12-10-30-11-13-34)17-21(18-32-28)20-4-3-5-22(16-20)35-14-15-38-26-7-2-1-6-24(26)29(35)37/h1-9,16-19,30H,10-15H2,(H,31,33)(H,32,36)/p+1	5406	1	O=C1c2ccccc2OCCN1c1cccc(-c2c[nH]c(=O)c(Nc3ccc(N4CC[NH2+]CC4)cn3)c2)c1	epsilon_fused	Blood,Homo sapiens										3										1
InChI=1S/C29H29N3O3S/c33-29-23(11-6-10-20-8-2-1-3-9-20)28(32(29)25-13-7-12-24-27(25)31-36-30-24)21-15-17-22(18-16-21)35-26-14-4-5-19-34-26/h1-3,7-9,12-13,15-18,23,26,28H,4-6,10-11,14,19H2	5407	1	O=C1C(CCCc2ccccc2)C(c2ccc(OC3CCCCO3)cc2)N1c1cccc2nsnc12	beta_single	Rattus norvegicus,Rattus norvegicus										2.39726										1
InChI=1S/C29H29NO3/c31-29-25(20-22-13-14-27-28(21-22)33-19-18-32-27)12-7-16-30(29)17-15-26(23-8-3-1-4-9-23)24-10-5-2-6-11-24/h1-6,8-11,13-15,21,25H,7,12,16-20H2	5409	1	O=C1C(Cc2ccc3c(c2)OCCO3)CCCN1CC=C(c1ccccc1)c1ccccc1	delta_single	Echinochloa esculenta,Echinochloa esculenta										2.82353										1
InChI=1S/C29H30N2O/c32-29-26(20-22-12-4-1-5-13-22)30-28(24-16-8-3-9-17-24)25-18-10-11-19-27(25)31(29)21-23-14-6-2-7-15-23/h1-2,4-7,10-15,18-19,24,26H,3,8-9,16-17,20-21H2	5410	1	O=C1C(Cc2ccccc2)N=C(C2CCCCC2)c2ccccc2N1Cc1ccccc1	epsilon_fused	Trypanosoma brucei brucei,Trypanosoma brucei brucei										3										1
InChI=1S/C29H31N3O3/c33-27-16-15-26(32(27)21-24-9-5-2-6-10-24)29(35)31-20-18-23-11-13-25(14-12-23)28(34)30-19-17-22-7-3-1-4-8-22/h1-14,26H,15-21H2,(H,30,34)(H,31,35)	5419	1	O=C(NCCc1ccccc1)c1ccc(CCNC(=O)C2CCC(=O)N2Cc2ccccc2)cc1	gamma_single	Integrin alpha-4/beta-1,Homo sapiens										1.21818										1
InChI=1S/C29H31NO2/c31-28-26-20-12-13-21-27(26)29(24-16-8-5-9-17-24,30(28)22-23-14-6-4-7-15-23)32-25-18-10-2-1-3-11-19-25/h4-9,12-17,20-21,25H,1-3,10-11,18-19,22H2	5425	1	O=C1c2ccccc2C(OC2CCCCCCC2)(c2ccccc2)N1Cc1ccccc1	gamma_fused	p53-binding protein Mdm-2,Homo sapiens										1.24174										1
InChI=1S/C29H31NO4/c31-29-25(12-7-15-30(29)18-22-8-3-1-4-9-22)16-24-13-14-27-28(17-24)33-21-26(34-27)20-32-19-23-10-5-2-6-11-23/h1-6,8-11,13-14,17,25-26H,7,12,15-16,18-21H2	5426	1	O=C1C(Cc2ccc3c(c2)OCC(COCc2ccccc2)O3)CCCN1Cc1ccccc1	delta_single	Echinochloa esculenta,Echinochloa esculenta										2.82353										1
InChI=1S/C29H32N4O2/c34-27-20-33(17-16-32(27)15-14-31-12-4-5-13-31)28-24-18-23(21-6-2-1-3-7-21)10-11-26(24)30-19-25(28)29(35)22-8-9-22/h1-3,6-7,10-11,18-19,22H,4-5,8-9,12-17,20H2/p+2	5428	1	O=C(c1c[nH+]c2ccc(-c3ccccc3)cc2c1N1CCN(CC[NH+]2CCCC2)C(=O)C1)C1CC1	delta_single	Maternal embryonic leucine zipper kinase,Homo sapiens										3										1
InChI=1S/C29H32N8O3/c38-27-3-1-12-36(27)13-2-16-40-22-6-8-31-25(19-22)24-7-9-32-29(35-24)33-21-4-5-23-20(17-21)18-26(34-23)28(39)37-14-10-30-11-15-37/h4-9,17-19,30,34H,1-3,10-16H2,(H,32,33,35)/p+1	5430	1	O=C1CCCN1CCCOc1ccnc(-c2ccnc(Nc3ccc4[nH]c(C(=O)N5CC[NH2+]CC5)cc4c3)n2)c1	gamma_single	Tyrosine-protein kinase SYK,Homo sapiens										1.1										1
InChI=1S/C29H32N8O3/c38-27-3-1-2-12-36(27)15-16-40-22-6-8-31-25(19-22)24-7-9-32-29(35-24)33-21-4-5-23-20(17-21)18-26(34-23)28(39)37-13-10-30-11-14-37/h4-9,17-19,30,34H,1-3,10-16H2,(H,32,33,35)/p+1	5431	1	O=C1CCCCN1CCOc1ccnc(-c2ccnc(Nc3ccc4[nH]c(C(=O)N5CC[NH2+]CC5)cc4c3)n2)c1	delta_single	Tyrosine-protein kinase SYK,Homo sapiens										1.1										1
InChI=1S/C29H33N3O5S/c33-28-19-37-27-12-11-25(15-26(27)31-28)38-20-23-16-30-17-29(34)32(23)22-7-9-24(10-8-22)36-14-4-13-35-18-21-5-2-1-3-6-21/h1-3,5-12,15,23,26-27,30H,4,13-14,16-20H2,(H,31,33)/p+1	5433	1	O=C1COC2C=CC(SCC3C[NH2+]CC(=O)N3c3ccc(OCCCOCc4ccccc4)cc3)=CC2N1	delta_single	Renin,Homo sapiens										1.09804										1
InChI=1S/C29H33N3O6/c33-28-20-38-27-12-11-25(15-26(27)31-28)37-19-23-16-30-17-29(34)32(23)22-7-9-24(10-8-22)36-14-4-13-35-18-21-5-2-1-3-6-21/h1-3,5-12,15,23,26-27,30H,4,13-14,16-20H2,(H,31,33)/p+1	5434	1	O=C1COC2C=CC(OCC3C[NH2+]CC(=O)N3c3ccc(OCCCOCc4ccccc4)cc3)=CC2N1	delta_single	Renin,Homo sapiens										1.09804										1
InChI=1S/C29H33N5O2/c35-28-27(26(16-15-21-9-3-1-4-10-21)34(28)22-11-5-2-6-12-22)33-29(36)32-20-19-31-25-17-18-30-24-14-8-7-13-23(24)25/h1,3-4,7-10,13-18,22,26-27H,2,5-6,11-12,19-20H2,(H,30,31)(H2,32,33,36)/p+1/b16-15+	5436	1	O=C(NCCNc1cc[nH+]c2ccccc12)NC1C(=O)N(C2CCCCC2)C1/C=C/c1ccccc1	beta_single	Plasmodium falciparum,Plasmodium falciparum										2.32984										1
InChI=1S/C29H34N6O3S/c36-28-24-18-21(11-10-20(24)19-35(28)22-12-15-30-16-13-22)32-29-31-17-14-27(34-29)33-25-8-4-5-9-26(25)39(37,38)23-6-2-1-3-7-23/h4-5,8-11,14,17-18,22-23,30H,1-3,6-7,12-13,15-16,19H2,(H2,31,32,33,34)	5437	1	O=C1c2cc(Nc3nccc(Nc4ccccc4S(=O)(=O)C4CCCCC4)n3)ccc2CN1C1CCNCC1	gamma_fused	ALK tyrosine kinase receptor,Homo sapiens										1.25										1
InChI=1S/C29H34N6O5S2/c36-22(13-18-7-3-1-4-8-18)32-15-24-33-20(16-41-24)26(38)30-11-12-31-27(39)21-17-42-29-25(28(40)35(21)29)34-23(37)14-19-9-5-2-6-10-19/h1-10,20-21,24-25,29,33H,11-17H2,(H,30,38)(H,31,39)(H,32,36)(H,34,37)/p+1	5438	1	O=C(Cc1ccccc1)NCC1[NH2+]C(C(=O)NCCNC(=O)C2CSC3C(NC(=O)Cc4ccccc4)C(=O)N23)CS1	beta_fused	Human immunodeficiency virus type 1 protease,Human immunodeficiency virus 1										1.04878										1
InChI=1S/C29H36N4O4/c34-27-19-33(20-28(35)32-15-13-22(14-16-32)30-18-21-7-3-1-4-8-21)29(36)25-17-24(11-12-26(25)31-27)37-23-9-5-2-6-10-23/h2,5-6,9-12,17,21-22,30H,1,3-4,7-8,13-16,18-20H2,(H,31,34)/p+1	5441	1	O=C1CN(CC(=O)N2CCC([NH2+]CC3CCCCC3)CC2)C(=O)c2cc(Oc3ccccc3)ccc2N1	epsilon_fused	Ghrelin receptor,Homo sapiens										1.08824										1
InChI=1S/C29H36N4O5/c34-27-19-33(29(36)25-18-24(6-7-26(25)31-27)38-23-4-2-1-3-5-23)20-28(35)32-14-9-22(10-15-32)30-13-8-21-11-16-37-17-12-21/h1-7,18,21-22,30H,8-17,19-20H2,(H,31,34)/p+1	5443	1	O=C1CN(CC(=O)N2CCC([NH2+]CCC3CCOCC3)CC2)C(=O)c2cc(Oc3ccccc3)ccc2N1	epsilon_fused	Ghrelin receptor,Homo sapiens										1.08824										1
InChI=1S/C29H37N5O2/c35-27(22-23-9-3-1-4-10-23)30-31-28-25-21-24(13-18-32-16-7-8-17-32)11-12-26(25)34(29(28)36)20-19-33-14-5-2-6-15-33/h1,3-4,9-12,21H,2,5-8,13-20,22H2,(H,30,35)/p+2/b31-28-	5444	1	O=C(Cc1ccccc1)N/N=C1\C(=O)N(CC[NH+]2CCCCC2)c2ccc(CC[NH+]3CCCC3)cc21	gamma_fused	Hepatocyte growth factor receptor,Homo sapiens										1.95833										1
InChI=1S/C29H38N4O3/c34-28-21-36-27-8-4-3-7-26(27)33(28)20-19-32-17-12-23(13-18-32)24-5-1-2-6-25(24)29(35)31-16-11-22-9-14-30-15-10-22/h1-8,22-23,30H,9-21H2,(H,31,35)/p+1	5445	1	O=C(NCCC1CCNCC1)c1ccccc1C1CC[NH+](CCN2C(=O)COc3ccccc32)CC1	delta_fused	Urotensin II receptor,Rattus norvegicus										1.29167										1
InChI=1S/C29H39N3O2/c33-28-13-12-25-21-26(29(34)31-19-16-24-14-17-30-18-15-24)10-11-27(25)22-32(28)20-6-2-5-9-23-7-3-1-4-8-23/h1,3-4,7-8,10-11,21,24,30H,2,5-6,9,12-20,22H2,(H,31,34)/p+1	5447	1	O=C(NCCC1CC[NH2+]CC1)c1ccc2c(c1)CCC(=O)N(CCCCCc1ccccc1)C2	epsilon_fused	Homo sapiens,Homo sapiens										1.31944										1
InChI=1S/C29H39N3O3/c33-27(30-21-9-7-16-24-12-3-1-4-13-24)17-8-10-22-31-29(35)26(32-23-11-18-28(32)34)20-19-25-14-5-2-6-15-25/h1-6,12-15,26H,7-11,16-23H2,(H,30,33)(H,31,35)	5448	1	O=C(CCCCNC(=O)C(CCc1ccccc1)N1CCCC1=O)NCCCCc1ccccc1	gamma_single	Beta-secretase 1,Homo sapiens										1.15254										1
InChI=1S/C30H21N5O3/c36-27-24-5-2-1-4-23(24)18-35(27)19-30(28(37)33-29(38)34-30)15-12-20-8-10-21(11-9-20)25-6-3-7-26(32-25)22-13-16-31-17-14-22/h1-11,13-14,16-17H,18-19H2,(H2,33,34,37,38)	5450	1	O=C1NC(=O)C(C#Cc2ccc(-c3cccc(-c4ccncc4)n3)cc2)(CN2Cc3ccccc3C2=O)N1	gamma_fused	TNF-alpha,Homo sapiens										1.40099										1
InChI=1S/C30H24N4O2/c35-28(19-34-27-12-6-2-8-23(27)17-22-7-1-3-9-24(22)30(34)36)31-18-20-13-15-21(16-14-20)29-32-25-10-4-5-11-26(25)33-29/h1-16H,17-19H2,(H,31,35)(H,32,33)	5452	1	O=C(CN1C(=O)c2ccccc2Cc2ccccc21)NCc1ccc(-c2nc3ccccc3[nH]2)cc1	epsilon_fused	Integrin alpha-V/beta-3,Homo sapiens										1.53846										1
InChI=1S/C30H24N6O2/c37-26(31-22-14-6-2-7-15-22)20-35-24-18-10-11-19-25(24)36-28(21-12-4-1-5-13-21)33-34-29(36)27(30(35)38)32-23-16-8-3-9-17-23/h1-19,27,32H,20H2,(H,31,37)	5453	1	O=C(CN1C(=O)C(Nc2ccccc2)c2nnc(-c3ccccc3)n2-c2ccccc21)Nc1ccccc1	epsilon_fused	Cholecystokinin A receptor,Homo sapiens										1.06329										1
InChI=1S/C30H25N5O4/c36-23-13-16-34(17-14-23)26-7-3-6-25(31-26)21-10-8-20(9-11-21)12-15-30(28(38)32-29(39)33-30)19-35-18-22-4-1-2-5-24(22)27(35)37/h1-11H,13-14,16-19H2,(H2,32,33,38,39)	5454	1	O=C1CCN(c2cccc(-c3ccc(C#CC4(CN5Cc6ccccc6C5=O)NC(=O)NC4=O)cc3)n2)CC1	gamma_fused	TNF-alpha,Homo sapiens										1.40099										1
InChI=1S/C30H25NO6/c32-30-22-13-20-8-10-25-29(37-18-35-25)28(20)27(21-7-9-24-26(14-21)36-17-34-24)23(22)15-31(30)11-4-12-33-16-19-5-2-1-3-6-19/h1-3,5-10,13-14H,4,11-12,15-18H2	5456	1	O=C1c2cc3ccc4c(c3c(-c3ccc5c(c3)OCO5)c2CN1CCCOCc1ccccc1)OCO4	gamma_fused	Hepatitis C virus,Hepatitis C virus										1.17526										1
InChI=1S/C30H26N2O2/c33-27(21-16-22-10-4-1-5-11-22)31-25-19-17-23(18-20-25)28-29(24-12-6-2-7-13-24)32(30(28)34)26-14-8-3-9-15-26/h1-15,17-20,28-29H,16,21H2,(H,31,33)	5457	1	O=C(CCc1ccccc1)Nc1ccc(C2C(=O)N(c3ccccc3)C2c2ccccc2)cc1	beta_single	MCF7,Homo sapiens										4.16514										1
InChI=1S/C30H26N2O3/c33-28-26(21-22-13-5-1-6-14-22)29(35-25-19-11-4-12-20-25)32(28)30(34)31-27(23-15-7-2-8-16-23)24-17-9-3-10-18-24/h1-20,26-27,29H,21H2,(H,31,34)	5459	1	O=C(NC(c1ccccc1)c1ccccc1)N1C(=O)C(Cc2ccccc2)C1Oc1ccccc1	beta_single	Chymase,Homo sapiens										1.48387										1
InChI=1S/C30H26N4O5/c35-28(12-14-38-23-9-10-24-25(17-23)31-18-22-7-4-13-34(22)30(24)37)32-21-8-11-26-19(15-21)16-27(39-26)29(36)33-20-5-2-1-3-6-20/h1-3,5-6,8-11,15-18,22H,4,7,12-14H2,(H,32,35)(H,33,36)	5462	1	O=C(CCOc1ccc2c(c1)N=CC1CCCN1C2=O)Nc1ccc2oc(C(=O)Nc3ccccc3)cc2c1	epsilon_fused	P815,Mus musculus										1.5										1
InChI=1S/C30H27N5O3/c36-28(33-20-19-32-25-17-18-31-24-14-8-7-13-23(24)25)29(37)34-27-26(16-15-21-9-3-1-4-10-21)35(30(27)38)22-11-5-2-6-12-22/h1-18,26-27H,19-20H2,(H,31,32)(H,33,36)(H,34,37)/p+1/b16-15+	5464	1	O=C(NCCNc1cc[nH+]c2ccccc12)C(=O)NC1C(=O)N(c2ccccc2)C1/C=C/c1ccccc1	beta_single	Plasmodium falciparum,Plasmodium falciparum										2.32984										1
InChI=1S/C30H28N4O/c35-29-30(13-16-33(17-14-30)20-27-24(21-11-12-21)7-5-15-31-27)25-8-2-4-10-28(25)34(29)23-18-22-6-1-3-9-26(22)32-19-23/h1-10,15,18-19,21H,11-14,16-17,20H2/p+1	5470	1	O=C1N(c2cnc3ccccc3c2)c2ccccc2C12CC[NH+](Cc1ncccc1C1CC1)CC2	gamma_fused	Egl nine homolog 1,Homo sapiens										1.92										1
InChI=1S/C30H28N4O2/c35-28(16-9-20-31-26-19-21-32-25-15-8-7-14-24(25)26)33-29-27(18-17-22-10-3-1-4-11-22)34(30(29)36)23-12-5-2-6-13-23/h1-8,10-15,17-19,21,27,29H,9,16,20H2,(H,31,32)(H,33,35)/p+1/b18-17+	5472	1	O=C(CCCNc1cc[nH+]c2ccccc12)NC1C(=O)N(c2ccccc2)C1/C=C/c1ccccc1	beta_single	Plasmodium falciparum,Plasmodium falciparum										2.32984										1
InChI=1S/C30H28N4O2/c35-29-28(27(19-18-22-10-3-1-4-11-22)34(29)24-14-5-2-6-15-24)33-30(36)32-21-20-31-26-17-9-13-23-12-7-8-16-25(23)26/h1-19,27-28,31H,20-21H2,(H2,32,33,36)/b19-18+	5473	1	O=C(NCCNc1cccc2ccccc12)NC1C(=O)N(c2ccccc2)C1/C=C/c1ccccc1	beta_single	Plasmodium falciparum,Plasmodium falciparum										2.32984										1
InChI=1S/C30H28N4O3/c35-28-15-14-27(34(28)20-22-6-2-1-3-7-22)30(37)32-18-16-21-10-12-23(13-11-21)33-29(36)25-17-19-31-26-9-5-4-8-24(25)26/h1-13,17,19,27H,14-16,18,20H2,(H,32,37)(H,33,36)	5476	1	O=C(Nc1ccc(CCNC(=O)C2CCC(=O)N2Cc2ccccc2)cc1)c1ccnc2ccccc12	gamma_single	Integrin alpha-4/beta-1,Homo sapiens										1.21818										1
InChI=1S/C30H28N6O3/c37-27-26-4-2-1-3-24(26)20-36(27)21-30(28(38)32-29(39)33-30)12-9-22-5-7-23(8-6-22)19-34-15-17-35(18-16-34)25-10-13-31-14-11-25/h1-8,10-11,13-14H,15-21H2,(H2,32,33,38,39)/p+2	5477	1	O=C1NC(=O)C(C#Cc2ccc(C[NH+]3CCN(c4cc[nH+]cc4)CC3)cc2)(CN2Cc3ccccc3C2=O)N1	gamma_fused	TNF-alpha,Homo sapiens										1.40099										1
InChI=1S/C30H28N6O6/c37-25-23(31-11-12-35-13-15-42-16-14-35)24(26(25)38)32-21-7-5-19(6-8-21)9-10-30(28(40)33-29(41)34-30)18-36-17-20-3-1-2-4-22(20)27(36)39/h1-8,31-32H,11-18H2,(H2,33,34,40,41)/p+1	5478	1	O=C1NC(=O)C(C#Cc2ccc(Nc3c(NCC[NH+]4CCOCC4)c(=O)c3=O)cc2)(CN2Cc3ccccc3C2=O)N1	gamma_fused	TNF-alpha,Homo sapiens										1.40099										1
InChI=1S/C30H28N8O3/c39-27(26-6-1-2-12-32-26)34-22-4-3-5-23(18-22)38-15-11-25-24(29(38)41)19-33-30(36-25)35-21-9-7-20(8-10-21)28(40)37-16-13-31-14-17-37/h1-10,12,18-19,31H,11,13-17H2,(H,34,39)(H,33,35,36)/p+1	5480	1	O=C(Nc1cccc(N2CCc3nc(Nc4ccc(C(=O)N5CC[NH2+]CC5)cc4)ncc3C2=O)c1)c1ccccn1	delta_fused	Tyrosine-protein kinase JAK2,Homo sapiens										1.21053										1
InChI=1S/C30H29N5O2/c36-29-28(27(17-16-22-10-3-1-4-11-22)35(29)23-12-5-2-6-13-23)34-30(37)33-20-9-19-31-26-18-21-32-25-15-8-7-14-24(25)26/h1-8,10-18,21,27-28H,9,19-20H2,(H,31,32)(H2,33,34,37)/p+1/b17-16+	5482	1	O=C(NCCCNc1cc[nH+]c2ccccc12)NC1C(=O)N(c2ccccc2)C1/C=C/c1ccccc1	beta_single	Plasmodium falciparum,Plasmodium falciparum										2.32984										1
InChI=1S/C30H29N5O2S/c36-29-25(34-27-10-9-19(16-32-27)24-7-3-12-31-24)15-20(17-33-29)18-4-1-5-21(14-18)35-13-11-23-22-6-2-8-26(22)38-28(23)30(35)37/h1,4-5,9-10,14-17,24,31H,2-3,6-8,11-13H2,(H,32,34)(H,33,36)/p+1	5483	1	O=C1c2sc3c(c2CCN1c1cccc(-c2c[nH]c(=O)c(Nc4ccc(C5CCC[NH2+]5)cn4)c2)c1)CCC3	delta_fused	Tyrosine-protein kinase BTK,Homo sapiens										1.07317										1
InChI=1S/C30H30N2O2/c33-29-18-26(19-32(29)28-14-20-11-12-23(28)13-20)30(34)31-27-16-24(21-7-3-1-4-8-21)15-25(17-27)22-9-5-2-6-10-22/h1-10,15-17,20,23,26,28H,11-14,18-19H2,(H,31,34)	5484	1	O=C(Nc1cc(-c2ccccc2)cc(-c2ccccc2)c1)C1CC(=O)N(C2CC3CCC2C3)C1	gamma_single	Enoyl-[acyl-carrier-protein] reductase,Mycobacterium tuberculosis										2.65789										1
InChI=1S/C30H30N4O/c35-30-29-24(21-31-34(29)27-10-3-1-4-11-27)17-20-33(30)26-15-13-23(14-16-26)28-12-6-5-9-25(28)22-32-18-7-2-8-19-32/h1,3-6,9-16,21H,2,7-8,17-20,22H2/p+1	5486	1	O=C1c2c(cnn2-c2ccccc2)CCN1c1ccc(-c2ccccc2C[NH+]2CCCCC2)cc1	delta_fused	Oryctolagus cuniculus,Oryctolagus cuniculus										2										1
InChI=1S/C30H30N4O3/c35-26(22-13-6-2-7-14-22)17-10-18-32-27-19-25(21-11-4-1-5-12-21)31-34(27)29(36)24-20-33(30(37)28(24)32)23-15-8-3-9-16-23/h1-2,4-7,11-14,19,23H,3,8-10,15-18,20H2	5488	1	O=C(CCCn1c2c(c(=O)n3nc(-c4ccccc4)cc13)CN(C1CCCCC1)C2=O)c1ccccc1	gamma_fused	Acyl coenzyme A:cholesterol acyltransferase 1,Rattus norvegicus										2.2										1
InChI=1S/C30H30N4O3/c35-26(22-14-8-5-9-15-22)20-33-27-18-25(21-12-6-4-7-13-21)31-34(27)29(36)24-19-32(30(37)28(24)33)23-16-10-2-1-3-11-17-23/h4-9,12-15,18,23H,1-3,10-11,16-17,19-20H2	5489	1	O=C(Cn1c2c(c(=O)n3nc(-c4ccccc4)cc13)CN(C1CCCCCCC1)C2=O)c1ccccc1	gamma_fused	Acyl coenzyme A:cholesterol acyltransferase 1,Rattus norvegicus										2.2										1
InChI=1S/C30H30N6O2/c37-29-25(34-28-10-9-21(17-32-28)24-7-3-11-31-24)15-22(18-33-29)19-4-1-6-23(14-19)35-12-13-36-26-8-2-5-20(26)16-27(36)30(35)38/h1,4,6,9-10,14-18,24,31H,2-3,5,7-8,11-13H2,(H,32,34)(H,33,37)/p+1	5490	1	O=C1c2cc3c(n2CCN1c1cccc(-c2c[nH]c(=O)c(Nc4ccc(C5CCC[NH2+]5)cn4)c2)c1)CCC3	delta_fused	Tyrosine-protein kinase BTK,Homo sapiens										1.07317										1
InChI=1S/C30H30N6O2/c37-29-28(33-23-9-8-22-17-31-11-10-19(22)14-23)34-25(18-32-29)20-5-3-6-24(15-20)35-12-13-36-26-7-2-1-4-21(26)16-27(36)30(35)38/h3,5-6,8-9,14-16,18,31H,1-2,4,7,10-13,17H2,(H,32,37)(H,33,34)/p+1	5491	1	O=C1c2cc3c(n2CCN1c1cccc(-c2c[nH]c(=O)c(Nc4ccc5c(c4)CC[NH2+]C5)n2)c1)CCCC3	delta_fused	Tyrosine-protein kinase BTK,Homo sapiens										1.07317										1
InChI=1S/C30H30N6O2S/c37-29-25(34-27-8-7-22(18-32-27)35-13-10-31-11-14-35)16-20(17-33-29)19-3-1-4-21(15-19)36-12-9-24-23-5-2-6-26(23)39-28(24)30(36)38/h1,3-4,7-8,15-18,31H,2,5-6,9-14H2,(H,32,34)(H,33,37)/p+1	5492	1	O=C1c2sc3c(c2CCN1c1cccc(-c2c[nH]c(=O)c(Nc4ccc(N5CC[NH2+]CC5)cn4)c2)c1)CCC3	delta_fused	Tyrosine-protein kinase BTK,Homo sapiens										1.07317										1
InChI=1S/C30H30N6O3/c37-29-25(34-28-9-8-23(18-32-28)39-24-16-31-17-24)13-21(15-33-29)19-5-3-6-22(12-19)35-10-11-36-26-7-2-1-4-20(26)14-27(36)30(35)38/h3,5-6,8-9,12-15,18,24,31H,1-2,4,7,10-11,16-17H2,(H,32,34)(H,33,37)/p+1	5493	1	O=C1c2cc3c(n2CCN1c1cccc(-c2c[nH]c(=O)c(Nc4ccc(OC5C[NH2+]C5)cn4)c2)c1)CCCC3	delta_fused	Tyrosine-protein kinase BTK,Homo sapiens										1.07317										1
InChI=1S/C30H31N3O4/c34-30-20-31-19-26(22-37-28-12-9-24-8-4-15-32-29(24)18-28)33(30)25-10-13-27(14-11-25)36-17-5-16-35-21-23-6-2-1-3-7-23/h1-4,6-15,18,26,31H,5,16-17,19-22H2/p+1	5497	1	O=C1C[NH2+]CC(COc2ccc3cccnc3c2)N1c1ccc(OCCCOCc2ccccc2)cc1	delta_single	Renin,Homo sapiens										1.09804										1
InChI=1S/C30H31N5O3/c36-26(31-22-14-6-2-7-15-22)20-35-25-19-11-10-18-24(25)27(21-12-4-1-5-13-21)33-28(29(35)37)34-30(38)32-23-16-8-3-9-17-23/h2-3,6-11,14-19,21,28H,1,4-5,12-13,20H2,(H,31,36)(H2,32,34,38)	5498	1	O=C(CN1C(=O)C(NC(=O)Nc2ccccc2)N=C(C2CCCCC2)c2ccccc21)Nc1ccccc1	epsilon_fused	Cavia porcellus,Cavia porcellus										2.81818										1
InChI=1S/C30H31N5O5S/c36-27-10-5-9-23-26(40-25-16-22(21-8-3-4-15-31-21)32-20-7-2-1-6-19(20)25)17-24(35(23)27)28(37)33-30(13-14-30)29(38)34-41(39)18-11-12-18/h1-4,6-8,15-16,18,23-24,26,41H,5,9-14,17H2,(H,33,37)	5499	1	O=C(NC1(C(=O)N=[SH](=O)C2CC2)CC1)C1CC(Oc2cc(-c3ccccn3)nc3ccccc23)C2CCCC(=O)N12	delta_fused	Hepatitis C virus,Hepatitis C virus										1.17526										1
InChI=1S/C30H31N7O2/c38-29-25(34-28-8-7-24(19-32-28)35-11-9-31-10-12-35)16-22(18-33-29)20-3-1-5-23(15-20)36-13-14-37-26-6-2-4-21(26)17-27(37)30(36)39/h1,3,5,7-8,15-19,31H,2,4,6,9-14H2,(H,32,34)(H,33,38)/p+1	5500	1	O=C1c2cc3c(n2CCN1c1cccc(-c2c[nH]c(=O)c(Nc4ccc(N5CC[NH2+]CC5)cn4)c2)c1)CCC3	delta_fused	Tyrosine-protein kinase BTK,Homo sapiens										1.07317										1
InChI=1S/C30H32N8O2/c39-29-25(33-28-9-8-23(19-32-28)36-12-10-31-11-13-36)18-24(34-35-29)20-5-3-6-22(16-20)37-14-15-38-26-7-2-1-4-21(26)17-27(38)30(37)40/h3,5-6,8-9,16-19,31H,1-2,4,7,10-15H2,(H,35,39)(H,32,33,34)/p+1	5506	1	O=C1c2cc3c(n2CCN1c1cccc(-c2cc(Nc4ccc(N5CC[NH2+]CC5)cn4)c(=O)[nH]n2)c1)CCCC3	delta_fused	Tyrosine-protein kinase BTK,Homo sapiens										1.07317										1
InChI=1S/C30H33N3O2/c34-28(22-24-10-4-1-5-11-24)31-30(25-12-6-2-7-13-25)18-16-26(17-19-30)32-20-21-33(29(35)23-32)27-14-8-3-9-15-27/h1-15,26H,16-23H2,(H,31,34)/p+1	5507	1	O=C(Cc1ccccc1)NC1(c2ccccc2)CCC([NH+]2CCN(c3ccccc3)C(=O)C2)CC1	delta_single	Neurokinin 1 receptor,Homo sapiens										1.14667										1
InChI=1S/C30H33N3O3/c34-28(17-15-23-7-3-1-4-8-23)32-21-25-13-11-24(12-14-25)19-20-31-30(36)27-16-18-29(35)33(27)22-26-9-5-2-6-10-26/h1-14,27H,15-22H2,(H,31,36)(H,32,34)	5508	1	O=C(CCc1ccccc1)NCc1ccc(CCNC(=O)C2CCC(=O)N2Cc2ccccc2)cc1	gamma_single	Integrin alpha-4/beta-1,Homo sapiens										1.21818										1
InChI=1S/C30H33N3O3/c34-29-21-33(18-17-22-11-13-24(14-12-22)31-20-23-7-3-1-4-8-23)30(35)27-19-26(15-16-28(27)32-29)36-25-9-5-2-6-10-25/h1-10,15-16,19,22,24,31H,11-14,17-18,20-21H2,(H,32,34)/p+1	5510	1	O=C1CN(CCC2CCC([NH2+]Cc3ccccc3)CC2)C(=O)c2cc(Oc3ccccc3)ccc2N1	epsilon_fused	Ghrelin receptor,Homo sapiens										1.08824										1
InChI=1S/C30H33N3O4/c34-30-20-31-19-26(22-37-28-12-9-24-8-4-15-32-29(24)18-28)33(30)25-10-13-27(14-11-25)36-17-5-16-35-21-23-6-2-1-3-7-23/h1-4,6-15,18,26,29,31-32H,5,16-17,19-22H2/p+1	5512	1	O=C1C[NH2+]CC(COC2=CC3NC=CC=C3C=C2)N1c1ccc(OCCCOCc2ccccc2)cc1	delta_single	Renin,Homo sapiens										1.09804										1
InChI=1S/C30H33N3O4S/c34-28-20-22(21-31-38(36,37)26-14-8-3-9-15-26)16-17-25-18-19-27(33(25)28)30(35)32-29(23-10-4-1-5-11-23)24-12-6-2-7-13-24/h1-15,22,25,27,29,31H,16-21H2,(H,32,35)	5513	1	O=C(NC(c1ccccc1)c1ccccc1)C1CCC2CCC(CNS(=O)(=O)c3ccccc3)CC(=O)N21	epsilon_fused	Inhibitor of apoptosis protein 3,Homo sapiens										2.31169										1
InChI=1S/C30H33N5O3/c36-28(33-20-19-32-25-17-18-31-24-14-8-7-13-23(24)25)29(37)34-27-26(16-15-21-9-3-1-4-10-21)35(30(27)38)22-11-5-2-6-12-22/h1,3-4,7-10,13-18,22,26-27H,2,5-6,11-12,19-20H2,(H,31,32)(H,33,36)(H,34,37)/p+1/b16-15+	5514	1	O=C(NCCNc1cc[nH+]c2ccccc12)C(=O)NC1C(=O)N(C2CCCCC2)C1/C=C/c1ccccc1	beta_single	Plasmodium falciparum,Plasmodium falciparum										2.32984										1
InChI=1S/C30H33NO3S/c32-29-30(21-25-14-5-2-6-15-25,18-10-9-13-24-11-3-1-4-12-24)19-20-31(29)28-23-35(33,34)22-26-16-7-8-17-27(26)28/h1-8,11-12,14-17,28H,9-10,13,18-23H2	5516	1	O=C1N(C2CS(=O)(=O)Cc3ccccc32)CCC1(CCCCc1ccccc1)Cc1ccccc1	gamma_single	Human immunodeficiency virus type 1 protease,Human immunodeficiency virus 1										1.04878										1
InChI=1S/C30H33NOS/c32-29-30(21-25-14-5-2-6-15-25,18-10-9-13-24-11-3-1-4-12-24)19-20-31(29)28-23-33-22-26-16-7-8-17-27(26)28/h1-8,11-12,14-17,28H,9-10,13,18-23H2	5517	1	O=C1N(C2CSCc3ccccc32)CCC1(CCCCc1ccccc1)Cc1ccccc1	gamma_single	Human immunodeficiency virus type 1 protease,Human immunodeficiency virus 1										1.04878										1
InChI=1S/C30H34N4O2/c35-29-28(27(19-18-22-10-3-1-4-11-22)34(29)24-14-5-2-6-15-24)33-30(36)32-21-20-31-26-17-9-13-23-12-7-8-16-25(23)26/h1,3-4,7-13,16-19,24,27-28,31H,2,5-6,14-15,20-21H2,(H2,32,33,36)/b19-18+	5518	1	O=C(NCCNc1cccc2ccccc12)NC1C(=O)N(C2CCCCC2)C1/C=C/c1ccccc1	beta_single	Plasmodium falciparum,Plasmodium falciparum										2.32984										1
InChI=1S/C30H35N5O2/c36-29-28(27(17-16-22-10-3-1-4-11-22)35(29)23-12-5-2-6-13-23)34-30(37)33-20-9-19-31-26-18-21-32-25-15-8-7-14-24(25)26/h1,3-4,7-8,10-11,14-18,21,23,27-28H,2,5-6,9,12-13,19-20H2,(H,31,32)(H2,33,34,37)/p+1/b17-16+	5521	1	O=C(NCCCNc1cc[nH+]c2ccccc12)NC1C(=O)N(C2CCCCC2)C1/C=C/c1ccccc1	beta_single	Plasmodium falciparum,Plasmodium falciparum										2.32984										1
InChI=1S/C30H37N3O4/c34-30-20-31-19-26(22-37-28-12-9-24-8-4-15-32-29(24)18-28)33(30)25-10-13-27(14-11-25)36-17-5-16-35-21-23-6-2-1-3-7-23/h1-3,6-7,9-14,18,24,26,29,31-32H,4-5,8,15-17,19-22H2/p+2	5524	1	O=C1C[NH2+]CC(COC2=CC3[NH2+]CCCC3C=C2)N1c1ccc(OCCCOCc2ccccc2)cc1	delta_single	Renin,Homo sapiens										1.09804										1
InChI=1S/C30H38N2O3/c33-30-29-11-10-27(35-20-28-7-4-14-34-28)18-23(29)12-13-32(30)26-16-22-9-8-21(15-24(22)17-26)19-31-25-5-2-1-3-6-25/h8-11,15,18,25-26,28,31H,1-7,12-14,16-17,19-20H2/p+1	5525	1	O=C1c2ccc(OCC3CCCO3)cc2CCN1C1Cc2ccc(C[NH2+]C3CCCCC3)cc2C1	delta_fused	Melanin-concentrating hormone receptor 1,Homo sapiens										1.47059										1
InChI=1S/C30H38N4O4/c35-28-20-34(30(37)26-19-25(11-12-27(26)32-28)38-24-9-5-2-6-10-24)21-29(36)33-17-14-23(15-18-33)31-16-13-22-7-3-1-4-8-22/h2,5-6,9-12,19,22-23,31H,1,3-4,7-8,13-18,20-21H2,(H,32,35)/p+1	5526	1	O=C1CN(CC(=O)N2CCC([NH2+]CCC3CCCCC3)CC2)C(=O)c2cc(Oc3ccccc3)ccc2N1	epsilon_fused	Ghrelin receptor,Homo sapiens										1.08824										1
InChI=1S/C30H39N5O5S/c36-28(34-16-21-14-22(17-34)19-35(18-21)29(37)24-9-11-31-12-10-24)20-33-13-3-6-27(30(33)38)32-41(39,40)26-8-7-23-4-1-2-5-25(23)15-26/h1-2,4-5,7-8,15,21-22,24,27,31-32H,3,6,9-14,16-20H2/p+1	5527	1	O=C(CN1CCCC(NS(=O)(=O)c2ccc3ccccc3c2)C1=O)N1CC2CC(C1)CN(C(=O)C1CC[NH2+]CC1)C2	delta_single	Coagulation factor X,Homo sapiens										1.67391										1
InChI=1S/C30H42N6O3S/c37-28-6-2-12-35(28)24-8-14-33(15-9-24)11-3-13-36-27-7-10-31-21-26(27)30(32-36)23-4-1-5-25(20-23)40-22-29(38)34-16-18-39-19-17-34/h1,4-5,20,24,31H,2-3,6-19,21-22H2/p+1	5528	1	O=C(CSc1cccc(-c2nn(CCC[NH+]3CCC(N4CCCC4=O)CC3)c3c2CNCC3)c1)N1CCOCC1	gamma_single	Cathepsin S,Homo sapiens										1.27119										1
InChI=1S/C30H43N7O2S/c38-28-6-2-14-36(28)24-8-16-34(17-9-24)13-3-15-37-27-7-10-32-21-26(27)30(33-37)23-4-1-5-25(20-23)40-22-29(39)35-18-11-31-12-19-35/h1,4-5,20,24,31-32H,2-3,6-19,21-22H2/p+2	5529	1	O=C(CSc1cccc(-c2nn(CCC[NH+]3CCC(N4CCCC4=O)CC3)c3c2CNCC3)c1)N1CC[NH2+]CC1	gamma_single	Cathepsin S,Homo sapiens										1.27119										1
InChI=1S/C30H44N6O2S/c37-29-6-2-12-35(29)25-8-14-33(15-9-25)11-3-13-36-28-7-10-31-23-27(28)30(32-36)24-4-1-5-26(22-24)39-21-18-34-16-19-38-20-17-34/h1,4-5,22,25,31H,2-3,6-21,23H2/p+2	5530	1	O=C1CCCN1C1CC[NH+](CCCn2nc(-c3cccc(SCC[NH+]4CCOCC4)c3)c3c2CCNC3)CC1	gamma_single	Cathepsin S,Homo sapiens										1.27119										1
InChI=1S/C30H44N6OS/c37-29-8-4-16-35(29)25-10-18-34(19-11-25)15-5-17-36-28-9-12-31-23-27(28)30(32-36)24-6-3-7-26(22-24)38-21-20-33-13-1-2-14-33/h3,6-7,22,25,31H,1-2,4-5,8-21,23H2/p+2	5531	1	O=C1CCCN1C1CC[NH+](CCCn2nc(-c3cccc(SCC[NH+]4CCCC4)c3)c3c2CCNC3)CC1	gamma_single	Cathepsin S,Homo sapiens										1.27119										1
InChI=1S/C30H45N7OS/c38-29-6-2-14-36(29)25-8-16-34(17-9-25)13-3-15-37-28-7-10-32-23-27(28)30(33-37)24-4-1-5-26(22-24)39-21-20-35-18-11-31-12-19-35/h1,4-5,22,25,31-32H,2-3,6-21,23H2/p+3	5532	1	O=C1CCCN1C1CC[NH+](CCCn2nc(-c3cccc(SCC[NH+]4CC[NH2+]CC4)c3)c3c2CCNC3)CC1	gamma_single	Cathepsin S,Homo sapiens										1.27119										1
InChI=1S/C31H24N2O2/c34-31-29-14-12-25(22-7-3-1-4-8-22)17-27(29)20-33(31)30(24-9-5-2-6-10-24)21-35-28-13-11-23-15-16-32-19-26(23)18-28/h1-19,30H,20-21H2	5534	1	O=C1c2ccc(-c3ccccc3)cc2CN1C(COc1ccc2ccncc2c1)c1ccccc1	gamma_fused	Coagulation factor X,Homo sapiens										1.67391										1
InChI=1S/C31H25N5O2/c37-28(32-24-16-8-3-9-17-24)21-35-26-18-10-11-19-27(26)36-29(23-14-6-2-7-15-23)33-34-30(36)25(31(35)38)20-22-12-4-1-5-13-22/h1-19,25H,20-21H2,(H,32,37)	5536	1	O=C(CN1C(=O)C(Cc2ccccc2)c2nnc(-c3ccccc3)n2-c2ccccc21)Nc1ccccc1	epsilon_fused	Cholecystokinin A receptor,Homo sapiens										1.06329										1
InChI=1S/C31H25N5O2/c37-29(32-22-13-5-2-6-14-22)20-36-28-18-10-8-16-24(28)30(21-11-3-1-4-12-21)33-27(31(36)38)19-26-23-15-7-9-17-25(23)34-35-26/h1-18,27H,19-20H2,(H,32,37)(H,34,35)/p+1	5538	1	O=C(CN1C(=O)C(Cc2n[nH]c3ccccc23)[NH+]=C(c2ccccc2)c2ccccc21)Nc1ccccc1	epsilon_fused	Cavia porcellus,Cavia porcellus										2.81818										1
InChI=1S/C31H26N4O2/c36-29(20-35-28-12-6-2-8-24(28)19-23-7-1-3-9-25(23)31(35)37)32-18-17-21-13-15-22(16-14-21)30-33-26-10-4-5-11-27(26)34-30/h1-16H,17-20H2,(H,32,36)(H,33,34)	5539	1	O=C(CN1C(=O)c2ccccc2Cc2ccccc21)NCCc1ccc(-c2nc3ccccc3[nH]2)cc1	epsilon_fused	Integrin alpha-V/beta-3,Homo sapiens										1.53846										1
InChI=1S/C31H27NO4/c33-28(21-10-14-23-12-4-1-5-13-23)35-27-20-11-15-24(22-27)29-30(36-26-18-8-3-9-19-26)31(34)32(29)25-16-6-2-7-17-25/h1-9,11-13,15-20,22,29-30H,10,14,21H2	5546	1	O=C(CCCc1ccccc1)Oc1cccc(C2C(Oc3ccccc3)C(=O)N2c2ccccc2)c1	beta_single	MCF7,Homo sapiens										4.16514										1
InChI=1S/C31H28N4O3/c36-29(21-35-28-13-7-5-11-25(28)18-24-10-4-6-12-27(24)30(35)37)32-19-23-14-16-26(17-15-23)34-31(38)33-20-22-8-2-1-3-9-22/h1-17H,18-21H2,(H,32,36)(H2,33,34,38)	5548	1	O=C(CN1C(=O)c2ccccc2Cc2ccccc21)NCc1ccc(NC(=O)NCc2ccccc2)cc1	epsilon_fused	Integrin alpha-V/beta-3,Homo sapiens										1.53846										1
InChI=1S/C31H29N3O2/c35-30-17-26(27-18-32-33(20-27)19-23-10-4-1-5-11-23)16-28-31(25-14-8-3-9-15-25)29(21-34(28)30)36-22-24-12-6-2-7-13-24/h1-15,17-18,20,28-29,31H,16,19,21-22H2	5550	1	O=C1C=C(c2cnn(Cc3ccccc3)c2)CC2C(c3ccccc3)C(OCc3ccccc3)CN12	delta_fused	Neurokinin 1 receptor,Homo sapiens										1.14667										1
InChI=1S/C31H29N5O2/c37-31-30-23(19-32-36(30)27-12-13-29-25(18-27)20-33-38-29)14-17-35(31)26-10-8-22(9-11-26)28-7-3-2-6-24(28)21-34-15-4-1-5-16-34/h2-3,6-13,18-20H,1,4-5,14-17,21H2/p+1	5553	1	O=C1c2c(cnn2-c2ccc3oncc3c2)CCN1c1ccc(-c2ccccc2C[NH+]2CCCCC2)cc1	delta_fused	Oryctolagus cuniculus,Oryctolagus cuniculus										2										1
InChI=1S/C31H29N5O3/c37-28-27-9-5-4-6-25(27)21-36(28)22-31(29(38)32-30(39)33-31)15-14-23-10-12-24(13-11-23)20-34-16-18-35(19-17-34)26-7-2-1-3-8-26/h1-13H,16-22H2,(H2,32,33,38,39)/p+1	5554	1	O=C1NC(=O)C(C#Cc2ccc(C[NH+]3CCN(c4ccccc4)CC3)cc2)(CN2Cc3ccccc3C2=O)N1	gamma_fused	TNF-alpha,Homo sapiens										1.40099										1
InChI=1S/C31H29N5O3/c37-29(34-20-9-19-32-26-18-21-33-25-15-8-7-14-24(25)26)30(38)35-28-27(17-16-22-10-3-1-4-11-22)36(31(28)39)23-12-5-2-6-13-23/h1-8,10-18,21,27-28H,9,19-20H2,(H,32,33)(H,34,37)(H,35,38)/p+1/b17-16+	5555	1	O=C(NCCCNc1cc[nH+]c2ccccc12)C(=O)NC1C(=O)N(c2ccccc2)C1/C=C/c1ccccc1	beta_single	Plasmodium falciparum,Plasmodium falciparum										2.32984										1
InChI=1S/C31H29N7O2/c39-28(36-17-9-2-10-18-36)20-37-26-15-7-8-16-27(26)38-29(21-11-3-1-4-12-21)34-35-30(38)23(31(37)40)19-25-22-13-5-6-14-24(22)32-33-25/h1,3-8,11-16,23H,2,9-10,17-20H2,(H,32,33)	5556	1	O=C(CN1C(=O)C(Cc2n[nH]c3ccccc23)c2nnc(-c3ccccc3)n2-c2ccccc21)N1CCCCC1	epsilon_fused	Cholecystokinin A receptor,Homo sapiens										1.06329										1
InChI=1S/C31H29N7O2/c39-30-11-5-17-37(30)18-6-14-32-28-20-23(12-15-33-28)26-21-29-34-16-13-27(38(29)36-26)24-9-4-10-25(19-24)35-31(40)22-7-2-1-3-8-22/h1-4,7-10,12-13,15-16,19-21H,5-6,11,14,17-18H2,(H,32,33)(H,35,40)	5557	1	O=C(Nc1cccc(-c2ccnc3cc(-c4ccnc(NCCCN5CCCC5=O)c4)nn23)c1)c1ccccc1	gamma_single	Serine/threonine-protein kinase B-raf,Homo sapiens										1.13333										1
InChI=1S/C31H29N7O3/c39-28(21-5-2-1-3-6-21)34-24-7-4-8-25(19-24)38-16-13-27-26(30(38)41)20-33-31(36-27)35-23-11-9-22(10-12-23)29(40)37-17-14-32-15-18-37/h1-12,19-20,32H,13-18H2,(H,34,39)(H,33,35,36)/p+1	5558	1	O=C(Nc1cccc(N2CCc3nc(Nc4ccc(C(=O)N5CC[NH2+]CC5)cc4)ncc3C2=O)c1)c1ccccc1	delta_fused	Tyrosine-protein kinase SRC,Homo sapiens										3.09091										1
InChI=1S/C31H30N4O2/c36-30-29(28(20-19-23-11-3-1-4-12-23)35(30)25-15-5-2-6-16-25)34-31(37)33-22-10-21-32-27-18-9-14-24-13-7-8-17-26(24)27/h1-9,11-20,28-29,32H,10,21-22H2,(H2,33,34,37)/b20-19+	5559	1	O=C(NCCCNc1cccc2ccccc12)NC1C(=O)N(c2ccccc2)C1/C=C/c1ccccc1	beta_single	Plasmodium falciparum,Plasmodium falciparum										2.32984										1
InChI=1S/C31H31N5O2/c37-30-29(28(18-17-23-11-3-1-4-12-23)36(30)24-13-5-2-6-14-24)35-31(38)34-21-10-9-20-32-27-19-22-33-26-16-8-7-15-25(26)27/h1-8,11-19,22,28-29H,9-10,20-21H2,(H,32,33)(H2,34,35,38)/p+1/b18-17+	5560	1	O=C(NCCCCNc1cc[nH+]c2ccccc12)NC1C(=O)N(c2ccccc2)C1/C=C/c1ccccc1	beta_single	Plasmodium falciparum,Plasmodium falciparum										2.32984										1
InChI=1S/C31H31N5O2S/c37-30-26(35-28-11-10-20(17-33-28)25-8-4-13-32-25)16-21(18-34-30)19-5-3-6-22(15-19)36-14-12-24-23-7-1-2-9-27(23)39-29(24)31(36)38/h3,5-6,10-11,15-18,25,32H,1-2,4,7-9,12-14H2,(H,33,35)(H,34,37)/p+1	5561	1	O=C1c2sc3c(c2CCN1c1cccc(-c2c[nH]c(=O)c(Nc4ccc(C5CCC[NH2+]5)cn4)c2)c1)CCCC3	delta_fused	Tyrosine-protein kinase BTK,Homo sapiens										1.07317										1
InChI=1S/C31H31N5O2S/c37-30-26(35-28-8-7-21(17-33-28)19-9-12-32-13-10-19)16-22(18-34-30)20-3-1-4-23(15-20)36-14-11-25-24-5-2-6-27(24)39-29(25)31(36)38/h1,3-4,7-8,15-19,32H,2,5-6,9-14H2,(H,33,35)(H,34,37)/p+1	5562	1	O=C1c2sc3c(c2CCN1c1cccc(-c2c[nH]c(=O)c(Nc4ccc(C5CC[NH2+]CC5)cn4)c2)c1)CCC3	delta_fused	Tyrosine-protein kinase BTK,Homo sapiens										1.07317										1
InChI=1S/C31H31N5O2S/c37-30-26(35-28-9-8-20(17-33-28)21-10-12-32-16-21)15-22(18-34-30)19-4-3-5-23(14-19)36-13-11-25-24-6-1-2-7-27(24)39-29(25)31(36)38/h3-5,8-9,14-15,17-18,21,32H,1-2,6-7,10-13,16H2,(H,33,35)(H,34,37)/p+1	5563	1	O=C1c2sc3c(c2CCN1c1cccc(-c2c[nH]c(=O)c(Nc4ccc(C5CC[NH2+]C5)cn4)c2)c1)CCCC3	delta_fused	Tyrosine-protein kinase BTK,Homo sapiens										1.07317										1
InChI=1S/C31H31N5O2S/c37-30-29(34-22-9-7-19(8-10-22)20-11-14-32-15-12-20)35-26(18-33-30)21-3-1-4-23(17-21)36-16-13-25-24-5-2-6-27(24)39-28(25)31(36)38/h1,3-4,7-10,17-18,20,32H,2,5-6,11-16H2,(H,33,37)(H,34,35)/p+1	5564	1	O=C1c2sc3c(c2CCN1c1cccc(-c2c[nH]c(=O)c(Nc4ccc(C5CC[NH2+]CC5)cc4)n2)c1)CCC3	delta_fused	Tyrosine-protein kinase BTK,Homo sapiens										1.07317										1
InChI=1S/C31H31N5O3S/c37-30-26(34-28-9-8-23(19-32-28)35-12-14-39-15-13-35)17-21(18-33-30)20-4-3-5-22(16-20)36-11-10-25-24-6-1-2-7-27(24)40-29(25)31(36)38/h3-5,8-9,16-19H,1-2,6-7,10-15H2,(H,32,34)(H,33,37)	5565	1	O=C1c2sc3c(c2CCN1c1cccc(-c2c[nH]c(=O)c(Nc4ccc(N5CCOCC5)cn4)c2)c1)CCCC3	delta_fused	Tyrosine-protein kinase BTK,Homo sapiens										1.07317										1
InChI=1S/C31H32N2O4/c34-28-20-22(21-37-31(36)25-14-8-3-9-15-25)16-17-26-18-19-27(33(26)28)30(35)32-29(23-10-4-1-5-11-23)24-12-6-2-7-13-24/h1-15,22,26-27,29H,16-21H2,(H,32,35)	5566	1	O=C(OCC1CCC2CCC(C(=O)NC(c3ccccc3)c3ccccc3)N2C(=O)C1)c1ccccc1	epsilon_fused	Inhibitor of apoptosis protein 3,Homo sapiens										2.31169										1
InChI=1S/C31H32N2O4/c34-31-21-32-20-28(23-37-30-14-11-25-9-4-5-10-26(25)19-30)33(31)27-12-15-29(16-13-27)36-18-6-17-35-22-24-7-2-1-3-8-24/h1-5,7-16,19,28,32H,6,17-18,20-23H2/p+1	5568	1	O=C1C[NH2+]CC(COc2ccc3ccccc3c2)N1c1ccc(OCCCOCc2ccccc2)cc1	delta_single	Renin,Homo sapiens										1.09804										1
InChI=1S/C31H32N4O4/c1-20-12-22-16-32-28-14-24(6-8-26(28)30(36)34(22)18-20)38-10-4-3-5-11-39-25-7-9-27-29(15-25)33-17-23-13-21(2)19-35(23)31(27)37/h6-9,14-17,22-23H,1-5,10-13,18-19H2	5570	1	C=C1CC2C=Nc3cc(OCCCCCOc4ccc5c(c4)N=CC4CC(=C)CN4C5=O)ccc3C(=O)N2C1	epsilon_fused	K562,Homo sapiens										1.55462										1
InChI=1S/C31H32N6O2/c38-30-29(34-24-9-7-20(8-10-24)21-11-13-32-14-12-21)35-26(19-33-30)22-3-1-5-25(17-22)36-15-16-37-27-6-2-4-23(27)18-28(37)31(36)39/h1,3,5,7-10,17-19,21,32H,2,4,6,11-16H2,(H,33,38)(H,34,35)/p+1	5571	1	O=C1c2cc3c(n2CCN1c1cccc(-c2c[nH]c(=O)c(Nc4ccc(C5CC[NH2+]CC5)cc4)n2)c1)CCC3	delta_fused	Tyrosine-protein kinase BTK,Homo sapiens										1.07317										1
InChI=1S/C31H32N6O2S/c38-30-26(35-28-9-8-23(19-33-28)36-14-11-32-12-15-36)17-21(18-34-30)20-4-3-5-22(16-20)37-13-10-25-24-6-1-2-7-27(24)40-29(25)31(37)39/h3-5,8-9,16-19,32H,1-2,6-7,10-15H2,(H,33,35)(H,34,38)/p+1	5572	1	O=C1c2sc3c(c2CCN1c1cccc(-c2c[nH]c(=O)c(Nc4ccc(N5CC[NH2+]CC5)cn4)c2)c1)CCCC3	delta_fused	Tyrosine-protein kinase BTK,Homo sapiens										1.07317										1
InChI=1S/C31H32N6O3/c38-30-26(34-29-8-7-21(18-32-29)20-35-11-13-40-14-12-35)16-24(19-33-30)22-3-1-5-25(15-22)36-9-10-37-27-6-2-4-23(27)17-28(37)31(36)39/h1,3,5,7-8,15-19H,2,4,6,9-14,20H2,(H,32,34)(H,33,38)/p+1	5573	1	O=C1c2cc3c(n2CCN1c1cccc(-c2c[nH]c(=O)c(Nc4ccc(C[NH+]5CCOCC5)cn4)c2)c1)CCC3	delta_fused	Tyrosine-protein kinase BTK,Homo sapiens										1.07317										1
InChI=1S/C31H32N6O3/c38-30-26(34-29-9-8-25(20-32-29)35-12-14-40-15-13-35)17-23(19-33-30)21-5-3-6-24(16-21)36-10-11-37-27-7-2-1-4-22(27)18-28(37)31(36)39/h3,5-6,8-9,16-20H,1-2,4,7,10-15H2,(H,32,34)(H,33,38)	5574	1	O=C1c2cc3c(n2CCN1c1cccc(-c2c[nH]c(=O)c(Nc4ccc(N5CCOCC5)cn4)c2)c1)CCCC3	delta_fused	Tyrosine-protein kinase BTK,Homo sapiens										1.07317										1
InChI=1S/C31H33N5O4/c37-27(35-18-13-25(14-19-35)34-16-4-1-5-17-34)23-10-8-22(9-11-23)12-15-31(29(39)32-30(40)33-31)21-36-20-24-6-2-3-7-26(24)28(36)38/h2-3,6-11,25H,1,4-5,13-14,16-21H2,(H2,32,33,39,40)/p+1	5576	1	O=C1NC(=O)C(C#Cc2ccc(C(=O)N3CCC([NH+]4CCCCC4)CC3)cc2)(CN2Cc3ccccc3C2=O)N1	gamma_fused	TNF-alpha,Homo sapiens										1.40099										1
InChI=1S/C31H33N5O4/c37-27(35-18-16-34(17-19-35)25-7-2-1-3-8-25)23-12-10-22(11-13-23)14-15-31(29(39)32-30(40)33-31)21-36-20-24-6-4-5-9-26(24)28(36)38/h4-6,9-13,25H,1-3,7-8,16-21H2,(H2,32,33,39,40)/p+1	5577	1	O=C1NC(=O)C(C#Cc2ccc(C(=O)N3CC[NH+](C4CCCCC4)CC3)cc2)(CN2Cc3ccccc3C2=O)N1	gamma_fused	TNF-alpha,Homo sapiens										1.40099										1
InChI=1S/C31H34N4O4/c36-28-17-34(21-11-12-33(16-21)15-19-5-1-2-6-19)31(37)25-14-23-22-7-3-4-8-24(22)32-29(23)30(35(25)28)20-9-10-26-27(13-20)39-18-38-26/h3-4,7-10,13,19,21,25,30,32H,1-2,5-6,11-12,14-18H2/p+1	5579	1	O=C1C2Cc3c([nH]c4ccccc34)C(c3ccc4c(c3)OCO4)N2C(=O)CN1C1CC[NH+](CC2CCCC2)C1	delta_fused	Plasmodium falciparum,Plasmodium falciparum										2.32984										1
InChI=1S/C31H35N3O2/c35-30-28-15-8-7-10-24(28)18-23-34(30)31(36)32-19-9-20-33-21-16-27(17-22-33)29(25-11-3-1-4-12-25)26-13-5-2-6-14-26/h1-8,10-15,27,29H,9,16-23H2,(H,32,36)/p+1	5580	1	O=C(NCCC[NH+]1CCC(C(c2ccccc2)c2ccccc2)CC1)N1CCc2ccccc2C1=O	delta_fused	C-C chemokine receptor type 3,Homo sapiens										2										1
InChI=1S/C31H35N5O3/c37-29(25-18-26(21-32-20-25)30(38)35-14-7-8-15-35)34-27(17-23-9-3-1-4-10-23)19-28-31(39)36(16-13-33-28)22-24-11-5-2-6-12-24/h1-6,9-12,18,20-21,27-28,33H,7-8,13-17,19,22H2,(H,34,37)/p+1	5582	1	O=C(NC(Cc1ccccc1)CC1[NH2+]CCN(Cc2ccccc2)C1=O)c1cncc(C(=O)N2CCCC2)c1	delta_single	Beta-secretase 1,Homo sapiens										1.15254										1
InChI=1S/C31H35N5O3/c37-29(34-20-9-19-32-26-18-21-33-25-15-8-7-14-24(25)26)30(38)35-28-27(17-16-22-10-3-1-4-11-22)36(31(28)39)23-12-5-2-6-13-23/h1,3-4,7-8,10-11,14-18,21,23,27-28H,2,5-6,9,12-13,19-20H2,(H,32,33)(H,34,37)(H,35,38)/p+1/b17-16+	5583	1	O=C(NCCCNc1cc[nH+]c2ccccc12)C(=O)NC1C(=O)N(C2CCCCC2)C1/C=C/c1ccccc1	beta_single	Plasmodium falciparum,Plasmodium falciparum										2.32984										1
InChI=1S/C31H36N4O2/c36-30-29(28(20-19-23-11-3-1-4-12-23)35(30)25-15-5-2-6-16-25)34-31(37)33-22-10-21-32-27-18-9-14-24-13-7-8-17-26(24)27/h1,3-4,7-9,11-14,17-20,25,28-29,32H,2,5-6,10,15-16,21-22H2,(H2,33,34,37)/b20-19+	5585	1	O=C(NCCCNc1cccc2ccccc12)NC1C(=O)N(C2CCCCC2)C1/C=C/c1ccccc1	beta_single	Plasmodium falciparum,Plasmodium falciparum										2.32984										1
InChI=1S/C31H37N5O2/c37-30-29(28(18-17-23-11-3-1-4-12-23)36(30)24-13-5-2-6-14-24)35-31(38)34-21-10-9-20-32-27-19-22-33-26-16-8-7-15-25(26)27/h1,3-4,7-8,11-12,15-19,22,24,28-29H,2,5-6,9-10,13-14,20-21H2,(H,32,33)(H2,34,35,38)/p+1/b18-17+	5587	1	O=C(NCCCCNc1cc[nH+]c2ccccc12)NC1C(=O)N(C2CCCCC2)C1/C=C/c1ccccc1	beta_single	Plasmodium falciparum,Plasmodium falciparum										2.32984										1
InChI=1S/C31H37N5O3/c37-29(33-16-15-22-9-3-1-4-10-22)27(18-25-19-32-21-34-25)35-30(38)28(17-23-11-5-2-6-12-23)36-20-24-13-7-8-14-26(24)31(36)39/h2,5-8,11-14,19,21-22,27-28H,1,3-4,9-10,15-18,20H2,(H,32,34)(H,33,37)(H,35,38)	5588	1	O=C(NCCC1CCCCC1)C(Cc1c[nH]cn1)NC(=O)C(Cc1ccccc1)N1Cc2ccccc2C1=O	gamma_fused	Renin,Homo sapiens										1.09804										1
InChI=1S/C32H26N2O2/c35-32-31-14-12-26(24-9-5-2-6-10-24)18-28(31)21-34(32)29(17-23-7-3-1-4-8-23)22-36-30-13-11-25-15-16-33-20-27(25)19-30/h1-16,18-20,29H,17,21-22H2	5591	1	O=C1c2ccc(-c3ccccc3)cc2CN1C(COc1ccc2ccncc2c1)Cc1ccccc1	gamma_fused	Coagulation factor X,Homo sapiens										1.67391										1
InChI=1S/C32H26N4O2/c37-30(34-24-13-5-2-6-14-24)21-36-29-18-10-8-16-26(29)31(22-11-3-1-4-12-22)35-28(32(36)38)19-23-20-33-27-17-9-7-15-25(23)27/h1-18,20,28,33H,19,21H2,(H,34,37)	5592	1	O=C(CN1C(=O)C(Cc2c[nH]c3ccccc23)N=C(c2ccccc2)c2ccccc21)Nc1ccccc1	epsilon_fused	Cavia porcellus,Cavia porcellus										2.81818										1
InChI=1S/C32H26N4O3S/c37-30-28-17-24-6-3-15-33-29(24)18-25(28)20-36(30)26-10-7-21(8-11-26)19-32(13-14-32)34-31(38)35-40(39)27-12-9-22-4-1-2-5-23(22)16-27/h1-12,15-18,40H,13-14,19-20H2,(H,34,38)	5593	1	O=C(N=[SH](=O)c1ccc2ccccc2c1)NC1(Cc2ccc(N3Cc4cc5ncccc5cc4C3=O)cc2)CC1	gamma_fused	Prostanoid EP4 receptor,Homo sapiens										1.38095										1
InChI=1S/C32H27NO5/c1-23-17-30(34)33(23)32(35)27-18-28(36-20-24-11-5-2-6-12-24)31(38-22-26-15-9-4-10-16-26)29(19-27)37-21-25-13-7-3-8-14-25/h2-16,18-19H,1,17,20-22H2	5595	1	C=C1CC(=O)N1C(=O)c1cc(OCc2ccccc2)c(OCc2ccccc2)c(OCc2ccccc2)c1	beta_single	Leukocyte elastase,Homo sapiens										3.10577										1
InChI=1S/C32H30N2O7/c35-29-27(34-26(21-41-32(34)37)24-14-8-3-9-15-24)25(17-16-22-10-4-1-5-11-22)33(29)28(31-38-18-19-39-31)30(36)40-20-23-12-6-2-7-13-23/h1-17,25-28,31H,18-21H2/b17-16+	5600	1	O=C(OCc1ccccc1)C(C1OCCO1)N1C(=O)C(N2C(=O)OCC2c2ccccc2)C1/C=C/c1ccccc1	beta_single	Vasopressin V1a receptor,Homo sapiens										1.76471										1
InChI=1S/C32H30N4O3/c37-29-18-17-28(36(29)22-24-8-3-1-4-9-24)31(38)34-21-19-23-13-15-26(16-14-23)35-32(39)30-27(12-7-20-33-30)25-10-5-2-6-11-25/h1-16,20,28H,17-19,21-22H2,(H,34,38)(H,35,39)	5601	1	O=C(Nc1ccc(CCNC(=O)C2CCC(=O)N2Cc2ccccc2)cc1)c1ncccc1-c1ccccc1	gamma_single	Integrin alpha-4/beta-1,Homo sapiens										1.21818										1
InChI=1S/C32H31N3O6/c36-29(33-20-23-12-6-2-7-13-23)28(31-39-18-19-40-31)34-25(17-16-22-10-4-1-5-11-22)27(30(34)37)35-26(21-41-32(35)38)24-14-8-3-9-15-24/h1-17,25-28,31H,18-21H2,(H,33,36)/b17-16+	5603	1	O=C(NCc1ccccc1)C(C1OCCO1)N1C(=O)C(N2C(=O)OCC2c2ccccc2)C1/C=C/c1ccccc1	beta_single	Vasopressin V1a receptor,Homo sapiens										1.76471										1
InChI=1S/C32H31N5O3S/c38-31-27(35-29-8-7-20-16-36(23-17-40-18-23)11-10-26(20)34-29)14-21(15-33-31)19-3-1-4-22(13-19)37-12-9-25-24-5-2-6-28(24)41-30(25)32(37)39/h1,3-4,7-8,13-15,23H,2,5-6,9-12,16-18H2,(H,33,38)(H,34,35)/p+1	5606	1	O=C1c2sc3c(c2CCN1c1cccc(-c2c[nH]c(=O)c(Nc4ccc5c(n4)CC[NH+](C4COC4)C5)c2)c1)CCC3	delta_fused	Tyrosine-protein kinase BTK,Homo sapiens										1.07317										1
InChI=1S/C32H32N2O2/c35-31-32(22-24-14-17-33-18-15-24,28-8-5-11-30(21-28)36-29-9-3-4-10-29)16-19-34(31)23-25-12-13-26-6-1-2-7-27(26)20-25/h1-2,5-8,11-15,17-18,20-21,29H,3-4,9-10,16,19,22-23H2	5608	1	O=C1N(Cc2ccc3ccccc3c2)CCC1(Cc1ccncc1)c1cccc(OC2CCCC2)c1	gamma_single	Phosphodiesterase 4,Homo sapiens										1.77273										1
InChI=1S/C32H32N2O2/c35-31-32(22-24-15-18-33-19-16-24,27-10-6-13-29(21-27)36-28-11-2-3-12-28)17-20-34(31)23-26-9-5-8-25-7-1-4-14-30(25)26/h1,4-10,13-16,18-19,21,28H,2-3,11-12,17,20,22-23H2	5609	1	O=C1N(Cc2cccc3ccccc23)CCC1(Cc1ccncc1)c1cccc(OC2CCCC2)c1	gamma_single	Phosphodiesterase 4,Homo sapiens										1.77273										1
InChI=1S/C32H32N4O2/c37-30(18-8-3-11-22-33-28-21-23-34-27-17-10-9-16-26(27)28)35-31-29(20-19-24-12-4-1-5-13-24)36(32(31)38)25-14-6-2-7-15-25/h1-2,4-7,9-10,12-17,19-21,23,29,31H,3,8,11,18,22H2,(H,33,34)(H,35,37)/p+1/b20-19+	5611	1	O=C(CCCCCNc1cc[nH+]c2ccccc12)NC1C(=O)N(c2ccccc2)C1/C=C/c1ccccc1	beta_single	Plasmodium falciparum,Plasmodium falciparum										2.32984										1
InChI=1S/C32H32N6O3/c39-31-27(35-30-8-7-22-17-36(25-18-41-19-25)10-9-26(22)34-30)14-23(16-33-31)20-3-1-5-24(13-20)37-11-12-38-28-6-2-4-21(28)15-29(38)32(37)40/h1,3,5,7-8,13-16,25H,2,4,6,9-12,17-19H2,(H,33,39)(H,34,35)/p+1	5612	1	O=C1c2cc3c(n2CCN1c1cccc(-c2c[nH]c(=O)c(Nc4ccc5c(n4)CC[NH+](C4COC4)C5)c2)c1)CCC3	delta_fused	Tyrosine-protein kinase BTK,Homo sapiens										1.07317										1
InChI=1S/C32H33N5O2S/c38-31-27(36-29-9-8-22(18-34-29)20-10-13-33-14-11-20)17-23(19-35-31)21-4-3-5-24(16-21)37-15-12-26-25-6-1-2-7-28(25)40-30(26)32(37)39/h3-5,8-9,16-20,33H,1-2,6-7,10-15H2,(H,34,36)(H,35,38)/p+1	5614	1	O=C1c2sc3c(c2CCN1c1cccc(-c2c[nH]c(=O)c(Nc4ccc(C5CC[NH2+]CC5)cn4)c2)c1)CCCC3	delta_fused	Tyrosine-protein kinase BTK,Homo sapiens										1.07317										1
InChI=1S/C32H33N5O2S/c38-31-30(35-23-10-8-20(9-11-23)21-12-15-33-16-13-21)36-27(19-34-31)22-4-3-5-24(18-22)37-17-14-26-25-6-1-2-7-28(25)40-29(26)32(37)39/h3-5,8-11,18-19,21,33H,1-2,6-7,12-17H2,(H,34,38)(H,35,36)/p+1	5615	1	O=C1c2sc3c(c2CCN1c1cccc(-c2c[nH]c(=O)c(Nc4ccc(C5CC[NH2+]CC5)cc4)n2)c1)CCCC3	delta_fused	Tyrosine-protein kinase BTK,Homo sapiens										1.07317										1
InChI=1S/C32H34N4O4/c37-29-15-14-28(36(29)23-25-8-3-1-4-9-25)30(38)33-17-16-24-10-7-13-27(22-24)32(40)35-20-18-34(19-21-35)31(39)26-11-5-2-6-12-26/h1-13,22,28H,14-21,23H2,(H,33,38)	5619	1	O=C(NCCc1cccc(C(=O)N2CCN(C(=O)c3ccccc3)CC2)c1)C1CCC(=O)N1Cc1ccccc1	gamma_single	Integrin alpha-4/beta-1,Homo sapiens										1.21818										1
InChI=1S/C32H34N4O4/c37-29-21-36(32(39)27-19-26(13-14-28(27)34-29)40-25-9-5-2-6-10-25)30(23-11-12-23)31(38)33-24-15-17-35(18-16-24)20-22-7-3-1-4-8-22/h1-10,13-14,19,23-24,30H,11-12,15-18,20-21H2,(H,33,38)(H,34,37)/p+1	5620	1	O=C1CN(C(C(=O)NC2CC[NH+](Cc3ccccc3)CC2)C2CC2)C(=O)c2cc(Oc3ccccc3)ccc2N1	epsilon_fused	Ghrelin receptor,Homo sapiens										1.08824										1
InChI=1S/C32H34N6O2/c39-31-30(35-25-10-8-21(9-11-25)22-12-14-33-15-13-22)36-27(20-34-31)23-5-3-6-26(18-23)37-16-17-38-28-7-2-1-4-24(28)19-29(38)32(37)40/h3,5-6,8-11,18-20,22,33H,1-2,4,7,12-17H2,(H,34,39)(H,35,36)/p+1	5621	1	O=C1c2cc3c(n2CCN1c1cccc(-c2c[nH]c(=O)c(Nc4ccc(C5CC[NH2+]CC5)cc4)n2)c1)CCCC3	delta_fused	Tyrosine-protein kinase BTK,Homo sapiens										1.07317										1
InChI=1S/C32H36N4O2S/c37-29-20-24(22-34-32(39)33-21-23-10-4-1-5-11-23)16-17-27-18-19-28(36(27)29)31(38)35-30(25-12-6-2-7-13-25)26-14-8-3-9-15-26/h1-15,24,27-28,30H,16-22H2,(H,35,38)(H2,33,34,39)	5625	1	O=C(NC(c1ccccc1)c1ccccc1)C1CCC2CCC(CNC(=S)NCc3ccccc3)CC(=O)N21	epsilon_fused	Inhibitor of apoptosis protein 3,Homo sapiens										2.31169										1
InChI=1S/C32H36N4O3/c37-30-27(19-24-12-6-2-7-13-24)28(21-34-30)31(38)35-26(18-23-10-4-1-5-11-23)20-29-32(39)36(17-16-33-29)22-25-14-8-3-9-15-25/h1-15,26-29,33H,16-22H2,(H,34,37)(H,35,38)/p+1	5626	1	O=C1NCC(C(=O)NC(Cc2ccccc2)CC2[NH2+]CCN(Cc3ccccc3)C2=O)C1Cc1ccccc1	delta_single	Beta-secretase 1,Homo sapiens										1.15254										1
InChI=1S/C32H36N4O4/c37-29-18-35(22-12-13-34(17-22)16-20-6-2-1-3-7-20)32(38)26-15-24-23-8-4-5-9-25(23)33-30(24)31(36(26)29)21-10-11-27-28(14-21)40-19-39-27/h4-5,8-11,14,20,22,26,31,33H,1-3,6-7,12-13,15-19H2/p+1	5627	1	O=C1C2Cc3c([nH]c4ccccc34)C(c3ccc4c(c3)OCO4)N2C(=O)CN1C1CC[NH+](CC2CCCCC2)C1	delta_fused	Plasmodium falciparum,Plasmodium falciparum										2.32984										1
InChI=1S/C32H36N4O5/c37-29(22-36-19-18-33-31(39)32(36)40)34-26(20-24-10-4-1-5-11-24)16-17-27(21-25-12-6-2-7-13-25)35-30(38)23-41-28-14-8-3-9-15-28/h1-15,26-27H,16-23H2,(H,33,39)(H,34,37)(H,35,38)	5628	1	O=C(COc1ccccc1)NC(CCC(Cc1ccccc1)NC(=O)CN1CCNC(=O)C1=O)Cc1ccccc1	delta_single	Human immunodeficiency virus type 1 protease,Human immunodeficiency virus 1										1.04878										1
InChI=1S/C32H37N3O3/c36-30(34-28-17-8-4-9-18-28)23-33-31(37)26(21-20-25-13-5-3-6-14-25)15-7-1-2-12-22-35-24-27-16-10-11-19-29(27)32(35)38/h3-6,8-11,13-14,16-19,26H,1-2,7,12,15,20-24H2,(H,33,37)(H,34,36)	5629	1	O=C(CNC(=O)C(CCCCCCN1Cc2ccccc2C1=O)CCc1ccccc1)Nc1ccccc1	gamma_fused	Mus musculus,Mus musculus										1.96154										1
InChI=1S/C32H37N3O4/c36-30(23-35-20-10-17-32(35)38)33-27(21-25-11-4-1-5-12-25)18-19-28(22-26-13-6-2-7-14-26)34-31(37)24-39-29-15-8-3-9-16-29/h1-9,11-16,27-28H,10,17-24H2,(H,33,36)(H,34,37)	5630	1	O=C(COc1ccccc1)NC(CCC(Cc1ccccc1)NC(=O)CN1CCCC1=O)Cc1ccccc1	gamma_single	Human immunodeficiency virus type 1 protease,Human immunodeficiency virus 1										1.04878										1
InChI=1S/C32H37N5O3/c38-29-28-10-6-5-7-26(28)22-37(29)23-32(30(39)33-31(40)34-32)16-15-24-11-13-25(14-12-24)21-35-17-19-36(20-18-35)27-8-3-1-2-4-9-27/h5-7,10-14,27H,1-4,8-9,17-23H2,(H2,33,34,39,40)/p+2	5631	1	O=C1NC(=O)C(C#Cc2ccc(C[NH+]3CC[NH+](C4CCCCCC4)CC3)cc2)(CN2Cc3ccccc3C2=O)N1	gamma_fused	TNF-alpha,Homo sapiens										1.40099										1
InChI=1S/C32H37N5O3/c38-30(35-21-10-9-20-33-27-19-22-34-26-16-8-7-15-25(26)27)31(39)36-29-28(18-17-23-11-3-1-4-12-23)37(32(29)40)24-13-5-2-6-14-24/h1,3-4,7-8,11-12,15-19,22,24,28-29H,2,5-6,9-10,13-14,20-21H2,(H,33,34)(H,35,38)(H,36,39)/p+1/b18-17+	5632	1	O=C(NCCCCNc1cc[nH+]c2ccccc12)C(=O)NC1C(=O)N(C2CCCCC2)C1/C=C/c1ccccc1	beta_single	Plasmodium falciparum,Plasmodium falciparum										2.32984										1
InChI=1S/C32H38N4O4/c37-29(34-20-16-26(17-21-34)33-18-8-3-9-19-33)22-35-27(15-14-24-10-4-1-5-11-24)30(31(35)38)36-28(23-40-32(36)39)25-12-6-2-7-13-25/h1-2,4-7,10-15,26-28,30H,3,8-9,16-23H2/p+1/b15-14+	5634	1	O=C(CN1C(=O)C(N2C(=O)OCC2c2ccccc2)C1/C=C/c1ccccc1)N1CCC([NH+]2CCCCC2)CC1	beta_single	Vasopressin V1a receptor,Homo sapiens										1.76471										1
InChI=1S/C32H41N5O2S/c38-31-11-5-17-36(31)26-13-19-35(20-14-26)16-6-18-37-30-12-15-33-24-29(30)32(34-37)25-7-4-10-28(23-25)40-22-21-39-27-8-2-1-3-9-27/h1-4,7-10,23,26,33H,5-6,11-22,24H2/p+1	5635	1	O=C1CCCN1C1CC[NH+](CCCn2nc(-c3cccc(SCCOc4ccccc4)c3)c3c2CCNC3)CC1	gamma_single	Cathepsin S,Homo sapiens										1.27119										1
InChI=1S/C32H47N7O2S/c40-30-8-3-16-38(30)26-10-18-37(19-11-26)15-4-17-39-29-9-13-34-23-28(29)31(36-39)24-5-1-7-27(21-24)42-20-14-35-32(41)25-6-2-12-33-22-25/h1,5,7,21,25-26,33-34H,2-4,6,8-20,22-23H2,(H,35,41)/p+2	5637	1	O=C(NCCSc1cccc(-c2nn(CCC[NH+]3CCC(N4CCCC4=O)CC3)c3c2CNCC3)c1)C1CCC[NH2+]C1	gamma_single	Cathepsin S,Homo sapiens										1.27119										1
InChI=1S/C33H26N6O2/c40-29(35-19-22-11-3-1-4-12-22)21-38-27-17-9-10-18-28(27)39-31(23-13-5-2-6-14-23)36-37-32(39)30(33(38)41)25-20-34-26-16-8-7-15-24(25)26/h1-18,20,30,34H,19,21H2,(H,35,40)	5638	1	O=C(CN1C(=O)C(c2c[nH]c3ccccc23)c2nnc(-c3ccccc3)n2-c2ccccc21)NCc1ccccc1	epsilon_fused	Cholecystokinin A receptor,Homo sapiens										1.06329										1
InChI=1S/C33H27N3O3S/c37-31-30-19-26-8-4-3-6-24(26)17-27(30)21-36(31)28-12-9-22(10-13-28)20-33(15-16-33)34-32(38)35-40(39)29-14-11-23-5-1-2-7-25(23)18-29/h1-14,17-19,40H,15-16,20-21H2,(H,34,38)	5639	1	O=C(N=[SH](=O)c1ccc2ccccc2c1)NC1(Cc2ccc(N3Cc4cc5ccccc5cc4C3=O)cc2)CC1	gamma_fused	Prostanoid EP4 receptor,Homo sapiens										1.38095										1
InChI=1S/C33H27N7O2/c41-30(34-20-22-11-3-1-4-12-22)21-39-28-17-9-10-18-29(28)40-31(23-13-5-2-6-14-23)37-38-32(40)25(33(39)42)19-27-24-15-7-8-16-26(24)35-36-27/h1-18,25H,19-21H2,(H,34,41)(H,35,36)	5640	1	O=C(CN1C(=O)C(Cc2n[nH]c3ccccc23)c2nnc(-c3ccccc3)n2-c2ccccc21)NCc1ccccc1	epsilon_fused	Cholecystokinin A receptor,Homo sapiens										1.06329										1
InChI=1S/C33H29N3O4/c37-32-28(26-8-2-4-10-30(26)34-32)18-22-13-15-25(40-22)21-36-31-11-5-3-9-27(31)29(33(36)38)19-23-12-14-24(39-23)20-35-16-6-1-7-17-35/h2-5,8-15,18-19H,1,6-7,16-17,20-21H2,(H,34,37)/p+1/b28-18+,29-19+	5642	1	O=C1Nc2ccccc2/C1=C\c1ccc(CN2C(=O)/C(=C/c3ccc(C[NH+]4CCCCC4)o3)c3ccccc32)o1	gamma_fused	Protein-tyrosine phosphatase 1B,Homo sapiens										6.33333										1
InChI=1S/C33H31N3O2/c37-31-33(30(27-12-6-2-7-13-27)36(31)29-14-8-3-9-15-29)20-22-35(23-21-33)32(38)34-28-18-16-26(17-19-28)24-25-10-4-1-5-11-25/h1-19,30H,20-24H2,(H,34,38)	5645	1	O=C(Nc1ccc(Cc2ccccc2)cc1)N1CCC2(CC1)C(=O)N(c1ccccc1)C2c1ccccc1	beta_spiro	Vanilloid receptor,Homo sapiens										2.45455										1
InChI=1S/C33H31N5O4/c39-31-30(35-26-9-6-22(7-10-26)32(40)37-14-16-42-17-15-37)36-29(20-34-31)25-2-1-3-27(19-25)38-13-12-24-18-23(21-4-5-21)8-11-28(24)33(38)41/h1-3,6-11,18-21H,4-5,12-17H2,(H,34,39)(H,35,36)	5646	1	O=C(c1ccc(Nc2nc(-c3cccc(N4CCc5cc(C6CC6)ccc5C4=O)c3)c[nH]c2=O)cc1)N1CCOCC1	delta_fused	Tyrosine-protein kinase BTK,Homo sapiens										1.07317										1
InChI=1S/C33H32N4O5/c38-30-19-36(22-12-13-35(18-22)14-15-40-23-6-2-1-3-7-23)33(39)27-17-25-24-8-4-5-9-26(24)34-31(25)32(37(27)30)21-10-11-28-29(16-21)42-20-41-28/h1-11,16,22,27,32,34H,12-15,17-20H2/p+1	5650	1	O=C1C2Cc3c([nH]c4ccccc34)C(c3ccc4c(c3)OCO4)N2C(=O)CN1C1CC[NH+](CCOc2ccccc2)C1	delta_fused	Plasmodium falciparum,Plasmodium falciparum										2.32984										1
InChI=1S/C33H34N6O3S/c40-32-28(36-30-8-7-24(18-34-30)37-11-13-38(14-12-37)25-19-42-20-25)16-22(17-35-32)21-3-1-4-23(15-21)39-10-9-27-26-5-2-6-29(26)43-31(27)33(39)41/h1,3-4,7-8,15-18,25H,2,5-6,9-14,19-20H2,(H,34,36)(H,35,40)/p+1	5652	1	O=C1c2sc3c(c2CCN1c1cccc(-c2c[nH]c(=O)c(Nc4ccc(N5CC[NH+](C6COC6)CC5)cn4)c2)c1)CCC3	delta_fused	Tyrosine-protein kinase BTK,Homo sapiens										1.07317										1
InChI=1S/C33H35N5O2/c39-32-31(30(20-19-25-13-5-3-6-14-25)38(32)26-15-7-4-8-16-26)37-33(40)36-23-12-2-1-11-22-34-29-21-24-35-28-18-10-9-17-27(28)29/h3-10,13-21,24,30-31H,1-2,11-12,22-23H2,(H,34,35)(H2,36,37,40)/p+1/b20-19+	5653	1	O=C(NCCCCCCNc1cc[nH+]c2ccccc12)NC1C(=O)N(c2ccccc2)C1/C=C/c1ccccc1	beta_single	Plasmodium falciparum,Plasmodium falciparum										2.32984										1
InChI=1S/C33H37N3O2/c37-31-25-34(23-24-35(31)29-15-8-3-9-16-29)28-18-20-33(21-19-28,27-13-6-2-7-14-27)36-22-10-17-30(32(36)38)26-11-4-1-5-12-26/h1-9,11-16,28,30H,10,17-25H2/p+1	5656	1	O=C1C[NH+](C2CCC(c3ccccc3)(N3CCCC(c4ccccc4)C3=O)CC2)CCN1c1ccccc1	delta_single	Neurokinin 1 receptor,Homo sapiens										1.14667										1
InChI=1S/C33H39N3O4S/c37-32-17-10-20-36(32)31(19-18-25-11-4-1-5-12-25)33(38)35-28(21-26-13-6-2-7-14-26)22-27-23-30(24-34-27)41(39,40)29-15-8-3-9-16-29/h1-9,11-16,27-28,30-31,34H,10,17-24H2,(H,35,38)/p+1	5660	1	O=C(NC(Cc1ccccc1)CC1CC(S(=O)(=O)c2ccccc2)C[NH2+]1)C(CCc1ccccc1)N1CCCC1=O	gamma_single	Beta-secretase 1,Homo sapiens										1.15254										1
InChI=1S/C33H41N5O2/c39-32-31(30(20-19-25-13-5-3-6-14-25)38(32)26-15-7-4-8-16-26)37-33(40)36-23-12-2-1-11-22-34-29-21-24-35-28-18-10-9-17-27(28)29/h3,5-6,9-10,13-14,17-21,24,26,30-31H,1-2,4,7-8,11-12,15-16,22-23H2,(H,34,35)(H2,36,37,40)/p+1/b20-19+	5661	1	O=C(NCCCCCCNc1cc[nH+]c2ccccc12)NC1C(=O)N(C2CCCCC2)C1/C=C/c1ccccc1	beta_single	Plasmodium falciparum,Plasmodium falciparum										2.32984										1
InChI=1S/C33H43N5O3/c34-30(24-35-32(40)26-11-5-2-6-12-26)29(25-9-3-1-4-10-25)16-22-36-20-14-28(15-21-36)38-19-7-13-27(33(38)41)23-31(39)37-17-8-18-37/h1-6,9-12,27-29,34H,7-8,13-24H2,(H,35,40)/p+1	5663	1	N=C(CNC(=O)c1ccccc1)C(CC[NH+]1CCC(N2CCCC(CC(=O)N3CCC3)C2=O)CC1)c1ccccc1	delta_single	Cavia porcellus,Cavia porcellus										2.81818										1
InChI=1S/C33H44N6O3/c40-29-14-7-19-37(29)20-8-18-35-32(41)28-23-38(21-22-39(28)33(42)36-26-11-2-1-3-12-26)31-27-13-5-4-9-24(27)15-16-25-10-6-17-34-30(25)31/h4-6,9-10,13,17,26,28,31H,1-3,7-8,11-12,14-16,18-23H2,(H,35,41)(H,36,42)/p+1	5664	1	O=C(NCCCN1CCCC1=O)C1C[NH+](C2c3ccccc3CCc3cccnc32)CCN1C(=O)NC1CCCCC1	gamma_single	Protein farnesyltransferase,Homo sapiens										1.36765										1
InChI=1S/C33H45NO/c1-25-9-5-6-13-27(25)16-17-28-14-7-15-31-29(19-22-32(28)31)18-20-30-21-23-33(35)34(30)24-8-12-26-10-3-2-4-11-26/h2-4,10-11,16-17,29-32H,1,5-9,12-15,18-24H2/b27-16-,28-17+	5665	1	C=C1CCCC/C1=C/C=C1\CCCC2C(CCC3CCC(=O)N3CCCc3ccccc3)CCC12	gamma_single	Vitamin D receptor,Homo sapiens										1.5										1
InChI=1S/C34H28N4O5/c39-32(13-15-42-27-10-11-28-29(19-27)35-20-26-6-3-14-38(26)34(28)41)36-24-9-12-30-23(17-24)18-31(43-30)33(40)37-25-8-7-21-4-1-2-5-22(21)16-25/h1-2,4-5,7-12,16-20,26H,3,6,13-15H2,(H,36,39)(H,37,40)	5666	1	O=C(CCOc1ccc2c(c1)N=CC1CCCN1C2=O)Nc1ccc2oc(C(=O)Nc3ccc4ccccc4c3)cc2c1	epsilon_fused	P815,Mus musculus										1.5										1
InChI=1S/C34H33N5O3/c40-32-31(36-27-12-9-23(10-13-27)33(41)38-16-2-1-3-17-38)37-30(21-35-32)26-5-4-6-28(20-26)39-18-15-25-19-24(22-7-8-22)11-14-29(25)34(39)42/h4-6,9-14,19-22H,1-3,7-8,15-18H2,(H,35,40)(H,36,37)	5671	1	O=C(c1ccc(Nc2nc(-c3cccc(N4CCc5cc(C6CC6)ccc5C4=O)c3)c[nH]c2=O)cc1)N1CCCCC1	delta_fused	Tyrosine-protein kinase BTK,Homo sapiens										1.07317										1
InChI=1S/C34H35N5O3S/c40-33-29(37-31-8-7-23(17-35-31)21-9-12-38(13-10-21)26-19-42-20-26)16-24(18-36-33)22-3-1-4-25(15-22)39-14-11-28-27-5-2-6-30(27)43-32(28)34(39)41/h1,3-4,7-8,15-18,21,26H,2,5-6,9-14,19-20H2,(H,35,37)(H,36,40)/p+1	5673	1	O=C1c2sc3c(c2CCN1c1cccc(-c2c[nH]c(=O)c(Nc4ccc(C5CC[NH+](C6COC6)CC5)cn4)c2)c1)CCC3	delta_fused	Tyrosine-protein kinase BTK,Homo sapiens										1.07317										1
InChI=1S/C34H35N7O3/c42-31(35-17-7-20-40-18-4-5-19-40)25-12-14-26(15-13-25)38-34-36-23-29-30(39-34)16-21-41(33(29)44)28-11-6-10-27(22-28)37-32(43)24-8-2-1-3-9-24/h1-3,6,8-15,22-23H,4-5,7,16-21H2,(H,35,42)(H,37,43)(H,36,38,39)/p+1	5675	1	O=C(NCCC[NH+]1CCCC1)c1ccc(Nc2ncc3c(n2)CCN(c2cccc(NC(=O)c4ccccc4)c2)C3=O)cc1	delta_fused	Tyrosine-protein kinase SRC,Homo sapiens										3.09091										1
InChI=1S/C34H37N7O3/c42-33-29(37-32-9-8-27(20-35-32)38-10-12-39(13-11-38)28-21-44-22-28)17-25(19-36-33)23-5-3-6-26(16-23)40-14-15-41-30-7-2-1-4-24(30)18-31(41)34(40)43/h3,5-6,8-9,16-20,28H,1-2,4,7,10-15,21-22H2,(H,35,37)(H,36,42)/p+1	5678	1	O=C1c2cc3c(n2CCN1c1cccc(-c2c[nH]c(=O)c(Nc4ccc(N5CC[NH+](C6COC6)CC5)cn4)c2)c1)CCCC3	delta_fused	Tyrosine-protein kinase BTK,Homo sapiens										1.07317										1
InChI=1S/C34H39N3O4/c38-32-12-7-17-37(32)29-22-26-23-31(24-29)41-19-5-4-18-40-30-11-6-8-25(21-30)20-28(36-33(26)39)13-16-35-34(14-15-34)27-9-2-1-3-10-27/h1-3,6,8-11,21-24,28,35H,4-5,7,12-20H2,(H,36,39)/p+1	5681	1	O=C1NC(CC[NH2+]C2(c3ccccc3)CC2)Cc2cccc(c2)OCCCCOc2cc1cc(N1CCCC1=O)c2	gamma_single	Beta-secretase 1,Homo sapiens										1.15254										1
InChI=1S/C34H40N6O6/c41-29(38-23-30(42)37-22-28-15-7-9-18-35-28)16-8-10-19-36-31(43)24-40-20-17-34(32(40)44,21-26-11-3-1-4-12-26)39-33(45)46-25-27-13-5-2-6-14-27/h1-7,9,11-15,18H,8,10,16-17,19-25H2,(H,36,43)(H,37,42)(H,38,41)(H,39,45)	5684	1	O=C(CCCCNC(=O)CN1CCC(Cc2ccccc2)(NC(=O)OCc2ccccc2)C1=O)NCC(=O)NCc1ccccn1	gamma_single	Renin,Homo sapiens										1.09804										1
InChI=1S/C34H40N6O7S2/c41-30-3-1-2-26-29(20-27(40(26)30)31(42)37-34(8-9-34)33(43)38-49(44)22-5-6-22)47-28-19-25(32-35-10-17-48-32)36-24-18-21(4-7-23(24)28)46-16-13-39-11-14-45-15-12-39/h4,7,10,17-19,22,26-27,29,49H,1-3,5-6,8-9,11-16,20H2,(H,37,42)/p+1	5685	1	O=C(NC1(C(=O)N=[SH](=O)C2CC2)CC1)C1CC(Oc2cc(-c3nccs3)nc3cc(OCC[NH+]4CCOCC4)ccc23)C2CCCC(=O)N12	delta_fused	Hepatitis C virus,Hepatitis C virus										1.17526										1
InChI=1S/C34H41N3O4S/c38-33-17-10-20-37(33)32(19-18-26-11-4-1-5-12-26)34(39)36-30(21-27-13-6-2-7-14-27)22-29-23-31(24-35-29)42(40,41)25-28-15-8-3-9-16-28/h1-9,11-16,29-32,35H,10,17-25H2,(H,36,39)/p+1	5687	1	O=C(NC(Cc1ccccc1)CC1CC(S(=O)(=O)Cc2ccccc2)C[NH2+]1)C(CCc1ccccc1)N1CCCC1=O	gamma_single	Beta-secretase 1,Homo sapiens										1.15254										1
InChI=1S/C34H41N5O3/c40-32(37-23-12-2-1-11-22-35-29-21-24-36-28-18-10-9-17-27(28)29)33(41)38-31-30(20-19-25-13-5-3-6-14-25)39(34(31)42)26-15-7-4-8-16-26/h3,5-6,9-10,13-14,17-21,24,26,30-31H,1-2,4,7-8,11-12,15-16,22-23H2,(H,35,36)(H,37,40)(H,38,41)/p+1/b20-19+	5688	1	O=C(NCCCCCCNc1cc[nH+]c2ccccc12)C(=O)NC1C(=O)N(C2CCCCC2)C1/C=C/c1ccccc1	beta_single	Plasmodium falciparum,Plasmodium falciparum										2.32984										1
InChI=1S/C34H42N6O4S/c41-32-23-44-31-8-2-1-7-30(31)40(32)26-10-15-37(16-11-26)13-4-14-39-29-9-12-35-22-28(29)34(36-39)25-5-3-6-27(21-25)45-24-33(42)38-17-19-43-20-18-38/h1-3,5-8,21,26,35H,4,9-20,22-24H2/p+1	5689	1	O=C(CSc1cccc(-c2nn(CCC[NH+]3CCC(N4C(=O)COc5ccccc54)CC3)c3c2CNCC3)c1)N1CCOCC1	delta_fused	Cathepsin S,Homo sapiens										1.27119										1
InChI=1S/C35H31N3O2/c39-35-34-29(23-33(40-34)26-11-5-2-6-12-26)21-28-22-30(37-19-17-36-18-20-37)15-16-32(28)38(35)24-27-13-7-8-14-31(27)25-9-3-1-4-10-25/h1-16,22-23,36H,17-21,24H2/p+1	5692	1	O=C1c2oc(-c3ccccc3)cc2Cc2cc(N3CC[NH2+]CC3)ccc2N1Cc1ccccc1-c1ccccc1	epsilon_fused	MAP kinase-activated protein kinase 2,Homo sapiens										1.3125										1
InChI=1S/C35H37N5O3S/c41-34-30(38-32-9-8-24(18-36-32)22-10-13-39(14-11-22)27-20-43-21-27)17-25(19-37-34)23-4-3-5-26(16-23)40-15-12-29-28-6-1-2-7-31(28)44-33(29)35(40)42/h3-5,8-9,16-19,22,27H,1-2,6-7,10-15,20-21H2,(H,36,38)(H,37,41)/p+1	5693	1	O=C1c2sc3c(c2CCN1c1cccc(-c2c[nH]c(=O)c(Nc4ccc(C5CC[NH+](C6COC6)CC5)cn4)c2)c1)CCCC3	delta_fused	Tyrosine-protein kinase BTK,Homo sapiens										1.07317										1
InChI=1S/C35H37N5O3S/c41-34-33(37-25-10-8-22(9-11-25)23-12-15-39(16-13-23)27-20-43-21-27)38-30(19-36-34)24-4-3-5-26(18-24)40-17-14-29-28-6-1-2-7-31(28)44-32(29)35(40)42/h3-5,8-11,18-19,23,27H,1-2,6-7,12-17,20-21H2,(H,36,41)(H,37,38)/p+1	5694	1	O=C1c2sc3c(c2CCN1c1cccc(-c2c[nH]c(=O)c(Nc4ccc(C5CC[NH+](C6COC6)CC5)cc4)n2)c1)CCCC3	delta_fused	Tyrosine-protein kinase BTK,Homo sapiens										1.07317										1
InChI=1S/C35H38N6O3/c42-34-30(38-33-9-8-26(19-36-33)23-10-12-39(13-11-23)29-21-44-22-29)17-27(20-37-34)24-5-3-6-28(16-24)40-14-15-41-31-7-2-1-4-25(31)18-32(41)35(40)43/h3,5-6,8-9,16-20,23,29H,1-2,4,7,10-15,21-22H2,(H,36,38)(H,37,42)/p+1	5697	1	O=C1c2cc3c(n2CCN1c1cccc(-c2c[nH]c(=O)c(Nc4ccc(C5CC[NH+](C6COC6)CC5)cn4)c2)c1)CCCC3	delta_fused	Tyrosine-protein kinase BTK,Homo sapiens										1.07317										1
InChI=1S/C35H40N2O6S/c38-33-35(22-27-11-5-2-6-12-27,18-19-37(33)32-25-44(40,41)24-28-13-7-8-14-31(28)32)17-15-29(21-26-9-3-1-4-10-26)36-34(39)43-30-16-20-42-23-30/h1-14,29-30,32H,15-25H2,(H,36,39)	5701	1	O=C(NC(CCC1(Cc2ccccc2)CCN(C2CS(=O)(=O)Cc3ccccc32)C1=O)Cc1ccccc1)OC1CCOC1	gamma_single	Human immunodeficiency virus type 1 protease,Human immunodeficiency virus 1										1.04878										1
InChI=1S/C35H40N4O4/c40-33-25-43-32-13-7-6-12-31(32)39(33)23-22-37-18-16-27(17-19-37)29-10-4-5-11-30(29)34(41)36-24-26-14-20-38(21-15-26)35(42)28-8-2-1-3-9-28/h1-13,26-27H,14-25H2,(H,36,41)/p+1	5702	1	O=C(NCC1CCN(C(=O)c2ccccc2)CC1)c1ccccc1C1CC[NH+](CCN2C(=O)COc3ccccc32)CC1	delta_fused	Urotensin II receptor,Rattus norvegicus										1.29167										1
InChI=1S/C35H42N4O5S/c40-34-25-44-33-13-7-6-12-32(33)39(34)23-22-37-18-16-29(17-19-37)30-10-4-5-11-31(30)35(41)36-24-27-14-20-38(21-15-27)45(42,43)26-28-8-2-1-3-9-28/h1-13,27,29H,14-26H2,(H,36,41)/p+1	5705	1	O=C(NCC1CCN(S(=O)(=O)Cc2ccccc2)CC1)c1ccccc1C1CC[NH+](CCN2C(=O)COc3ccccc32)CC1	delta_fused	Urotensin II receptor,Rattus norvegicus										1.29167										1
InChI=1S/C35H46N6O2S/c42-34-26-43-33-11-3-2-10-32(33)41(34)28-13-20-39(21-14-28)18-7-19-40-31-12-15-36-25-30(31)35(37-40)27-8-6-9-29(24-27)44-23-22-38-16-4-1-5-17-38/h2-3,6,8-11,24,28,36H,1,4-5,7,12-23,25-26H2/p+2	5706	1	O=C1COc2ccccc2N1C1CC[NH+](CCCn2nc(-c3cccc(SCC[NH+]4CCCCC4)c3)c3c2CCNC3)CC1	delta_fused	Cathepsin S,Homo sapiens										1.27119										1
InChI=1S/C35H52N6OS/c42-34-10-4-17-40(34)30-13-20-38(21-14-30)16-5-18-41-33-11-15-36-25-32(33)35(37-41)28-8-3-9-31(24-28)43-23-22-39-19-12-27-6-1-2-7-29(27)26-39/h3,8-9,24,27,29-30,36H,1-2,4-7,10-23,25-26H2/p+2	5708	1	O=C1CCCN1C1CC[NH+](CCCn2nc(-c3cccc(SCC[NH+]4CCC5CCCCC5C4)c3)c3c2CCNC3)CC1	gamma_single	Cathepsin S,Homo sapiens										1.27119										1
InChI=1S/C36H30N2O6/c39-33(28-19-11-4-12-20-28)32(35(41)43-23-26-15-7-2-8-16-26)37-29(22-21-25-13-5-1-6-14-25)31(34(37)40)38-30(24-44-36(38)42)27-17-9-3-10-18-27/h1-22,29-32H,23-24H2/b22-21+	5709	1	O=C(OCc1ccccc1)C(C(=O)c1ccccc1)N1C(=O)C(N2C(=O)OCC2c2ccccc2)C1/C=C/c1ccccc1	beta_single	Vasopressin V1a receptor,Homo sapiens										1.76471										1
InChI=1S/C36H39N3O3/c40-35(37-24-8-26-38-25-7-13-36(38)41)23-18-29-14-19-33(20-15-29)42-34-21-16-31(17-22-34)28-39(32-11-5-2-6-12-32)27-30-9-3-1-4-10-30/h1-6,9-12,14-17,19-22H,7-8,13,18,23-28H2,(H,37,40)	5712	1	O=C(CCc1ccc(Oc2ccc(CN(Cc3ccccc3)c3ccccc3)cc2)cc1)NCCCN1CCCC1=O	gamma_single	Glucocorticoid receptor,Homo sapiens										3										1
InChI=1S/C36H42N4O5/c41-34-26-44-33-13-7-6-12-32(33)40(34)23-22-38-18-16-29(17-19-38)30-10-4-5-11-31(30)35(42)37-24-27-14-20-39(21-15-27)36(43)45-25-28-8-2-1-3-9-28/h1-13,27,29H,14-26H2,(H,37,42)/p+1	5717	1	O=C(NCC1CCN(C(=O)OCc2ccccc2)CC1)c1ccccc1C1CC[NH+](CCN2C(=O)COc3ccccc32)CC1	delta_fused	Urotensin II receptor,Rattus norvegicus										1.29167										1
InChI=1S/C36H43N5O4/c42-34-26-45-33-13-7-6-12-32(33)41(34)23-22-39-18-16-29(17-19-39)30-10-4-5-11-31(30)35(43)37-24-28-14-20-40(21-15-28)36(44)38-25-27-8-2-1-3-9-27/h1-13,28-29H,14-26H2,(H,37,43)(H,38,44)/p+1	5718	1	O=C(NCC1CCN(C(=O)NCc2ccccc2)CC1)c1ccccc1C1CC[NH+](CCN2C(=O)COc3ccccc32)CC1	delta_fused	Urotensin II receptor,Rattus norvegicus										1.29167										1
InChI=1S/C37H32N6O2/c44-34(41-21-11-20-31(41)25-12-3-1-4-13-25)24-42-32-18-9-10-19-33(32)43-35(26-14-5-2-6-15-26)39-40-36(43)29(37(42)45)22-27-23-38-30-17-8-7-16-28(27)30/h1-10,12-19,23,29,31,38H,11,20-22,24H2	5723	1	O=C1C(Cc2c[nH]c3ccccc23)c2nnc(-c3ccccc3)n2-c2ccccc2N1CC(=O)N1CCCC1c1ccccc1	epsilon_fused	Cholecystokinin A receptor,Homo sapiens										1.06329										1
InChI=1S/C37H33N7O2/c45-34(42-20-10-14-28(42)22-27-13-8-9-19-38-27)24-43-32-17-6-7-18-33(32)44-35(25-11-2-1-3-12-25)40-41-36(44)30(37(43)46)21-26-23-39-31-16-5-4-15-29(26)31/h1-9,11-13,15-19,23,28,30,39H,10,14,20-22,24H2	5725	1	O=C1C(Cc2c[nH]c3ccccc23)c2nnc(-c3ccccc3)n2-c2ccccc2N1CC(=O)N1CCCC1Cc1ccccn1	epsilon_fused	Cholecystokinin A receptor,Homo sapiens										1.06329										1
InChI=1S/C37H48N8O5S/c46-33(40-15-7-18-44-19-17-39-26-44)13-12-29(20-27-8-3-1-4-9-27)42-34(47)23-41-37(50)30(21-28-10-5-2-6-11-28)43-35(48)24-45-31-22-38-16-14-32(31)51-25-36(45)49/h2,5-6,10-11,14,16-17,19,22,26-27,29-30H,1,3-4,7-9,12-13,15,18,20-21,23-25H2,(H,40,46)(H,41,50)(H,42,47)(H,43,48)	5734	1	O=C(CCC(CC1CCCCC1)NC(=O)CNC(=O)C(Cc1ccccc1)NC(=O)CN1C(=O)CSc2ccncc21)NCCCn1ccnc1	delta_fused	Renin,Homo sapiens										1.09804										1
InChI=1S/C37H49N5O4/c43-35(17-16-28-10-4-1-5-11-28)41-34(24-33-25-38-27-39-33)36(44)40-32(22-29-12-6-2-7-13-29)23-31-18-19-42(37(31)45)20-21-46-26-30-14-8-3-9-15-30/h1,3-5,8-11,14-15,25,27,29,31-32,34H,2,6-7,12-13,16-24,26H2,(H,38,39)(H,40,44)(H,41,43)	5735	1	O=C(CCc1ccccc1)NC(Cc1c[nH]cn1)C(=O)NC(CC1CCCCC1)CC1CCN(CCOCc2ccccc2)C1=O	gamma_single	Renin,Homo sapiens										1.09804										1
InChI=1S/C37H50N6OS/c44-36-11-5-19-42(36)32-15-23-40(24-16-32)18-6-20-43-35-12-17-38-28-34(35)37(39-43)31-9-4-10-33(27-31)45-26-25-41-21-13-30(14-22-41)29-7-2-1-3-8-29/h1-4,7-10,27,30,32,38H,5-6,11-26,28H2/p+2	5736	1	O=C1CCCN1C1CC[NH+](CCCn2nc(-c3cccc(SCC[NH+]4CCC(c5ccccc5)CC4)c3)c3c2CCNC3)CC1	gamma_single	Cathepsin S,Homo sapiens										1.27119										1
InChI=1S/C38H34N6O2/c45-35(42-20-19-27(24-42)21-26-11-3-1-4-12-26)25-43-33-17-9-10-18-34(33)44-36(28-13-5-2-6-14-28)40-41-37(44)31(38(43)46)22-29-23-39-32-16-8-7-15-30(29)32/h1-18,23,27,31,39H,19-22,24-25H2	5738	1	O=C(CN1C(=O)C(Cc2c[nH]c3ccccc23)c2nnc(-c3ccccc3)n2-c2ccccc21)N1CCC(Cc2ccccc2)C1	epsilon_fused	Cholecystokinin A receptor,Homo sapiens										1.06329										1
InChI=1S/C38H34N6O2/c45-35(42-22-12-11-19-32(42)26-13-3-1-4-14-26)25-43-33-20-9-10-21-34(33)44-36(27-15-5-2-6-16-27)40-41-37(44)30(38(43)46)23-28-24-39-31-18-8-7-17-29(28)31/h1-10,13-18,20-21,24,30,32,39H,11-12,19,22-23,25H2	5739	1	O=C1C(Cc2c[nH]c3ccccc23)c2nnc(-c3ccccc3)n2-c2ccccc2N1CC(=O)N1CCCCC1c1ccccc1	epsilon_fused	Cholecystokinin A receptor,Homo sapiens										1.06329										1
InChI=1S/C38H35N7O2/c46-35(43-21-11-9-15-29(43)23-28-14-8-10-20-39-28)25-44-33-18-6-7-19-34(33)45-36(26-12-2-1-3-13-26)41-42-37(45)31(38(44)47)22-27-24-40-32-17-5-4-16-30(27)32/h1-8,10,12-14,16-20,24,29,31,40H,9,11,15,21-23,25H2	5741	1	O=C1C(Cc2c[nH]c3ccccc23)c2nnc(-c3ccccc3)n2-c2ccccc2N1CC(=O)N1CCCCC1Cc1ccccn1	epsilon_fused	Cholecystokinin A receptor,Homo sapiens										1.06329										1
InChI=1S/C38H35N7O2/c46-35(43-21-9-8-12-29(43)22-26-17-19-39-20-18-26)25-44-33-15-6-7-16-34(33)45-36(27-10-2-1-3-11-27)41-42-37(45)31(38(44)47)23-28-24-40-32-14-5-4-13-30(28)32/h1-7,10-11,13-20,24,29,31,40H,8-9,12,21-23,25H2	5742	1	O=C1C(Cc2c[nH]c3ccccc23)c2nnc(-c3ccccc3)n2-c2ccccc2N1CC(=O)N1CCCCC1Cc1ccncc1	epsilon_fused	Cholecystokinin A receptor,Homo sapiens										1.06329										1
InChI=1S/C38H50N8O5S/c47-33(40-18-8-20-45-22-19-39-27-45)15-14-30(23-28-9-3-1-4-10-28)43-35(49)25-42-37(51)31(24-29-11-5-2-6-12-29)44-34(48)16-21-46-32-13-7-17-41-38(32)52-26-36(46)50/h2,5-7,11-13,17,19,22,27-28,30-31H,1,3-4,8-10,14-16,18,20-21,23-26H2,(H,40,47)(H,42,51)(H,43,49)(H,44,48)	5751	1	O=C(CCC(CC1CCCCC1)NC(=O)CNC(=O)C(Cc1ccccc1)NC(=O)CCN1C(=O)CSc2ncccc21)NCCCn1ccnc1	delta_fused	Renin,Homo sapiens										1.09804										1
InChI=1S/C38H50N8O5S/c47-34(41-16-7-19-45-21-18-40-27-45)13-12-30(22-28-8-3-1-4-9-28)43-36(49)25-42-38(51)31(23-29-10-5-2-6-11-29)44-35(48)15-20-46-32-14-17-39-24-33(32)52-26-37(46)50/h2,5-6,10-11,14,17-18,21,24,27-28,30-31H,1,3-4,7-9,12-13,15-16,19-20,22-23,25-26H2,(H,41,47)(H,42,51)(H,43,49)(H,44,48)/p+1	5752	1	O=C(CCC(CC1CCCCC1)NC(=O)CNC(=O)C(Cc1ccccc1)NC(=O)CCN1C(=O)CSc2c[nH+]ccc21)NCCCn1ccnc1	delta_fused	Renin,Homo sapiens										1.09804										1
InChI=1S/C38H50N8O5S/c47-34(41-16-7-19-45-21-18-40-27-45)13-12-30(22-28-8-3-1-4-9-28)43-36(49)25-42-38(51)31(23-29-10-5-2-6-11-29)44-35(48)15-20-46-32-24-39-17-14-33(32)52-26-37(46)50/h2,5-6,10-11,14,17-18,21,24,27-28,30-31H,1,3-4,7-9,12-13,15-16,19-20,22-23,25-26H2,(H,41,47)(H,42,51)(H,43,49)(H,44,48)	5753	1	O=C(CCC(CC1CCCCC1)NC(=O)CNC(=O)C(Cc1ccccc1)NC(=O)CCN1C(=O)CSc2ccncc21)NCCCn1ccnc1	delta_fused	Renin,Homo sapiens										1.09804										1
InChI=1S/C38H50N8O6/c47-34(41-16-7-19-45-21-18-40-27-45)13-12-30(22-28-8-3-1-4-9-28)43-36(49)25-42-38(51)31(23-29-10-5-2-6-11-29)44-35(48)15-20-46-32-24-39-17-14-33(32)52-26-37(46)50/h2,5-6,10-11,14,17-18,21,24,27-28,30-31H,1,3-4,7-9,12-13,15-16,19-20,22-23,25-26H2,(H,41,47)(H,42,51)(H,43,49)(H,44,48)	5754	1	O=C(CCC(CC1CCCCC1)NC(=O)CNC(=O)C(Cc1ccccc1)NC(=O)CCN1C(=O)COc2ccncc21)NCCCn1ccnc1	delta_fused	Renin,Homo sapiens										1.09804										1
InChI=1S/C38H50N8O7S/c47-34(41-16-7-19-45-21-18-40-27-45)13-12-30(22-28-8-3-1-4-9-28)43-36(49)25-42-38(51)31(23-29-10-5-2-6-11-29)44-35(48)15-20-46-32-24-39-17-14-33(32)54(52,53)26-37(46)50/h2,5-6,10-11,14,17-18,21,24,27-28,30-31H,1,3-4,7-9,12-13,15-16,19-20,22-23,25-26H2,(H,41,47)(H,42,51)(H,43,49)(H,44,48)	5755	1	O=C(CCC(CC1CCCCC1)NC(=O)CNC(=O)C(Cc1ccccc1)NC(=O)CCN1C(=O)CS(=O)(=O)c2ccncc21)NCCCn1ccnc1	delta_fused	Renin,Homo sapiens										1.09804										1
InChI=1S/C38H52N6O3/c45-36(18-17-29-11-4-1-5-12-29)43-35(25-34-27-40-28-41-34)37(46)42-33(23-30-13-6-2-7-14-30)24-32-19-22-44(38(32)47)21-10-20-39-26-31-15-8-3-9-16-31/h1,3-5,8-9,11-12,15-16,27-28,30,32-33,35,39H,2,6-7,10,13-14,17-26H2,(H,40,41)(H,42,46)(H,43,45)/p+1	5756	1	O=C(CCc1ccccc1)NC(Cc1c[nH]cn1)C(=O)NC(CC1CCCCC1)CC1CCN(CCC[NH2+]Cc2ccccc2)C1=O	gamma_single	Renin,Homo sapiens										1.09804										1
InChI=1S/C39H36N6O2/c46-36(43-22-12-11-17-30(43)23-27-13-3-1-4-14-27)26-44-34-20-9-10-21-35(34)45-37(28-15-5-2-6-16-28)41-42-38(45)32(39(44)47)24-29-25-40-33-19-8-7-18-31(29)33/h1-10,13-16,18-21,25,30,32,40H,11-12,17,22-24,26H2	5759	1	O=C1C(Cc2c[nH]c3ccccc23)c2nnc(-c3ccccc3)n2-c2ccccc2N1CC(=O)N1CCCCC1Cc1ccccc1	epsilon_fused	Cholecystokinin A receptor,Homo sapiens										1.06329										1
InChI=1S/C39H42N2O2/c42-38(40-37-23-22-32-19-10-11-21-36(32)37)33(25-29-13-4-1-5-14-29)20-12-24-41-35(27-31-17-8-3-9-18-31)28-34(39(41)43)26-30-15-6-2-7-16-30/h1-11,13-19,21,33-35,37H,12,20,22-28H2,(H,40,42)	5764	1	O=C(NC1CCc2ccccc21)C(CCCN1C(=O)C(Cc2ccccc2)CC1Cc1ccccc1)Cc1ccccc1	gamma_single	MT4,Homo sapiens										1.05882										1
InChI=1S/C39H42N6O2/c46-36(43-22-12-11-17-30(43)23-27-13-3-1-4-14-27)26-44-34-20-9-10-21-35(34)45-37(28-15-5-2-6-16-28)41-42-38(45)32(39(44)47)24-29-25-40-33-19-8-7-18-31(29)33/h2,5-10,15-16,18-21,25,27,30,32,40H,1,3-4,11-14,17,22-24,26H2	5765	1	O=C1C(Cc2c[nH]c3ccccc23)c2nnc(-c3ccccc3)n2-c2ccccc2N1CC(=O)N1CCCCC1CC1CCCCC1	epsilon_fused	Cholecystokinin A receptor,Homo sapiens										1.06329										1
InChI=1S/C39H52N8O5S/c48-35(42-17-8-20-46-22-19-41-28-46)15-14-31(23-29-9-3-1-4-10-29)44-37(50)26-43-39(52)32(24-30-11-5-2-6-12-30)45-36(49)13-7-21-47-33-25-40-18-16-34(33)53-27-38(47)51/h2,5-6,11-12,16,18-19,22,25,28-29,31-32H,1,3-4,7-10,13-15,17,20-21,23-24,26-27H2,(H,42,48)(H,43,52)(H,44,50)(H,45,49)	5768	1	O=C(CCC(CC1CCCCC1)NC(=O)CNC(=O)C(Cc1ccccc1)NC(=O)CCCN1C(=O)CSc2ccncc21)NCCCn1ccnc1	delta_fused	Renin,Homo sapiens										1.09804										1
InChI=1S/C40H42N6O5S/c47-39(30-9-10-31-26-46(40(48)35(31)25-30)23-17-28-15-18-41-19-16-28)43-20-21-45-52(49,50)24-22-42-27-44-32-13-11-29(12-14-32)38-33-5-1-3-7-36(33)51-37-8-4-2-6-34(37)38/h1-14,25,27-28,41,45H,15-24,26H2,(H,43,47)/p+1	5776	1	O=C(NCCNS(=O)(=O)CC/N=C/N=C1C=CC(=C2c3ccccc3Oc3ccccc32)C=C1)c1ccc2c(c1)C(=O)N(CCC1CC[NH2+]CC1)C2	gamma_fused	Homo sapiens,Homo sapiens										1.31944										1
InChI=1S/C41H56N6O9/c48-33(27-53-34-10-2-1-3-11-34)25-47-26-35(44-45-47)38(30-8-4-5-9-30)43-39(51)52-19-15-40(14-13-36(49)42-16-7-18-46-17-6-12-37(46)50)54-41(56-55-40)31-21-28-20-29(23-31)24-32(41)22-28/h1-3,10-11,26,28-32,38H,4-9,12-25,27H2,(H,42,49)(H,43,51)	5796	1	O=C(COc1ccccc1)Cn1cc(C(NC(=O)OCCC2(CCC(=O)NCCCN3CCCC3=O)OOC3(O2)C2CC4CC(C2)CC3C4)C2CCCC2)nn1	gamma_single	Plasmodium falciparum,Plasmodium falciparum										2.32984										1
InChI=1S/C42H49N7O5S/c50-38-27-49-37-26-31(42(52)46-55(53)45-19-5-4-18-44-38)12-16-35(37)40(29-7-2-1-3-8-29)41(49)30-10-14-34(15-11-30)54-28-32-25-33(48-22-6-9-39(48)51)13-17-36(32)47-23-20-43-21-24-47/h4-5,10-17,25-26,29,43,55H,1-3,6-9,18-24,27-28H2,(H,44,50)(H,45,46,52,53)/b5-4-	5806	1	O=C1Cn2c(-c3ccc(OCc4cc(N5CCCC5=O)ccc4N4CCNCC4)cc3)c(C3CCCCC3)c3ccc(cc32)C(=O)N=[SH](=O)NC/C=C\CN1	gamma_single	Genome polyprotein,Hepatitis C virus genotype 1b (strain HC-J4) (HCV)										1.4										1
InChI=1S/C43H49N5O6S/c49-39-28-48-38-27-32(43(51)45-55(52)25-6-2-5-19-44-39)13-17-36(38)41(30-8-3-1-4-9-30)42(48)31-11-15-35(16-12-31)54-29-33-26-34(47-20-7-10-40(47)50)14-18-37(33)46-21-23-53-24-22-46/h2,6,11-18,26-27,30,55H,1,3-5,7-10,19-25,28-29H2,(H,44,49)/b6-2-	5822	1	O=C1Cn2c(-c3ccc(OCc4cc(N5CCCC5=O)ccc4N4CCOCC4)cc3)c(C3CCCCC3)c3ccc(cc32)C(=O)N=[SH](=O)C/C=C\CCN1	gamma_single	Genome polyprotein,Hepatitis C virus genotype 1b (strain HC-J4) (HCV)										1.4										1
InChI=1S/C43H50N6O5S/c50-39-28-49-38-27-32(43(52)46-55(53)25-6-2-5-19-45-39)13-17-36(38)41(30-8-3-1-4-9-30)42(49)31-11-15-35(16-12-31)54-29-33-26-34(48-22-7-10-40(48)51)14-18-37(33)47-23-20-44-21-24-47/h2,6,11-18,26-27,30,44,55H,1,3-5,7-10,19-25,28-29H2,(H,45,50)/b6-2-	5823	1	O=C1Cn2c(-c3ccc(OCc4cc(N5CCCC5=O)ccc4N4CCNCC4)cc3)c(C3CCCCC3)c3ccc(cc32)C(=O)N=[SH](=O)C/C=C\CCN1	gamma_single	Genome polyprotein,Hepatitis C virus genotype 1b (strain HC-J4) (HCV)										1.4										1
InChI=1S/C44H44N4O4/c49-41(27-22-35-20-21-37(47-35)31-36-13-8-28-45-36)46-29-7-12-33-16-23-38(24-17-33)48-43(40(44(48)50)14-6-11-32-9-2-1-3-10-32)34-18-25-39(26-19-34)52-42-15-4-5-30-51-42/h1-3,8-10,13,16-21,23-26,28,31,40,42-43,45H,4-6,11,14-15,22,27,29-30H2,(H,46,49)/b37-31-	5828	1	O=C(CCC1=N/C(=C\c2ccc[nH]2)C=C1)NCC#Cc1ccc(N2C(=O)C(CCCc3ccccc3)C2c2ccc(OC3CCCCO3)cc2)cc1	beta_single	Rattus norvegicus,Rattus norvegicus										2.39726										1
InChI=1S/C44H51N5O5/c50-40-29-49-39-28-33(44(52)46-21-7-2-1-6-20-45-40)14-18-37(39)42(31-9-4-3-5-10-31)43(49)32-12-16-36(17-13-32)54-30-34-27-35(48-22-8-11-41(48)51)15-19-38(34)47-23-25-53-26-24-47/h1-2,12-19,27-28,31H,3-11,20-26,29-30H2,(H,45,50)(H,46,52)/b2-1-	5832	1	O=C1Cn2c(-c3ccc(OCc4cc(N5CCCC5=O)ccc4N4CCOCC4)cc3)c(C3CCCCC3)c3ccc(cc32)C(=O)NCC/C=C\CCN1	gamma_single	Genome polyprotein,Hepatitis C virus genotype 1b (strain HC-J4) (HCV)										1.4										1
InChI=1S/C45H45N3O4/c49-40(30-48-39(27-33-13-5-2-6-14-33)28-37(45(48)51)26-32-11-3-1-4-12-32)29-36(44(50)47-43-23-20-35-15-7-8-17-42(35)43)25-34-18-21-41(22-19-34)52-31-38-16-9-10-24-46-38/h1-19,21-22,24,36-37,39,43H,20,23,25-31H2,(H,47,50)	5837	1	O=C(CC(Cc1ccc(OCc2ccccn2)cc1)C(=O)NC1CCc2ccccc21)CN1C(=O)C(Cc2ccccc2)CC1Cc1ccccc1	gamma_single	MT4,Homo sapiens										1.05882										1
InChI=1S/C45H49N3O6/c49-39(29-36(25-32-9-3-1-4-10-32)44(51)46-42-20-17-35-13-7-8-14-41(35)42)30-48-38(28-37(45(48)52)26-33-11-5-2-6-12-33)27-34-15-18-40(19-16-34)54-31-43(50)47-21-23-53-24-22-47/h1-16,18-19,36-38,42H,17,20-31H2,(H,46,51)	5838	1	O=C(CC(Cc1ccccc1)C(=O)NC1CCc2ccccc21)CN1C(=O)C(Cc2ccccc2)CC1Cc1ccc(OCC(=O)N2CCOCC2)cc1	gamma_single	MT4,Homo sapiens										1.05882										1
InChI=1S/C45H49N3O6/c49-39(30-48-38(27-33-11-5-2-6-12-33)28-37(45(48)52)26-32-9-3-1-4-10-32)29-36(44(51)46-42-20-17-35-13-7-8-14-41(35)42)25-34-15-18-40(19-16-34)54-31-43(50)47-21-23-53-24-22-47/h1-16,18-19,36-38,42H,17,20-31H2,(H,46,51)	5839	1	O=C(CC(Cc1ccc(OCC(=O)N2CCOCC2)cc1)C(=O)NC1CCc2ccccc21)CN1C(=O)C(Cc2ccccc2)CC1Cc1ccccc1	gamma_single	MT4,Homo sapiens										1.05882										1
InChI=1S/C45H50N4O5/c50-39(30-49-38(27-33-11-5-2-6-12-33)28-37(45(49)53)26-32-9-3-1-4-10-32)29-36(44(52)47-42-20-17-35-13-7-8-14-41(35)42)25-34-15-18-40(19-16-34)54-31-43(51)48-23-21-46-22-24-48/h1-16,18-19,36-38,42,46H,17,20-31H2,(H,47,52)/p+1	5842	1	O=C(CC(Cc1ccc(OCC(=O)N2CC[NH2+]CC2)cc1)C(=O)NC1CCc2ccccc21)CN1C(=O)C(Cc2ccccc2)CC1Cc1ccccc1	gamma_single	MT4,Homo sapiens										1.05882										1
InChI=1S/C45H51N3O5/c49-40(31-37(27-33-9-3-1-4-10-33)44(50)46-43-20-17-36-13-7-8-14-42(36)43)32-48-39(30-38(45(48)51)28-34-11-5-2-6-12-34)29-35-15-18-41(19-16-35)53-26-23-47-21-24-52-25-22-47/h1-16,18-19,37-39,43H,17,20-32H2,(H,46,50)/p+1	5844	1	O=C(CC(Cc1ccccc1)C(=O)NC1CCc2ccccc21)CN1C(=O)C(Cc2ccccc2)CC1Cc1ccc(OCC[NH+]2CCOCC2)cc1	gamma_single	MT4,Homo sapiens										1.05882										1
InChI=1S/C45H51N3O5/c49-40(32-48-39(29-34-11-5-2-6-12-34)30-38(45(48)51)28-33-9-3-1-4-10-33)31-37(44(50)46-43-20-17-36-13-7-8-14-42(36)43)27-35-15-18-41(19-16-35)53-26-23-47-21-24-52-25-22-47/h1-16,18-19,37-39,43H,17,20-32H2,(H,46,50)/p+1	5845	1	O=C(CC(Cc1ccc(OCC[NH+]2CCOCC2)cc1)C(=O)NC1CCc2ccccc21)CN1C(=O)C(Cc2ccccc2)CC1Cc1ccccc1	gamma_single	MT4,Homo sapiens										1.05882										1
InChI=1S/C46H46N2O4/c49-41(30-38(26-33-12-4-1-5-13-33)45(50)47-44-25-22-37-18-10-11-19-43(37)44)31-48-40(29-39(46(48)51)27-34-14-6-2-7-15-34)28-35-20-23-42(24-21-35)52-32-36-16-8-3-9-17-36/h1-21,23-24,38-40,44H,22,25-32H2,(H,47,50)	5848	1	O=C(CC(Cc1ccccc1)C(=O)NC1CCc2ccccc21)CN1C(=O)C(Cc2ccccc2)CC1Cc1ccc(OCc2ccccc2)cc1	gamma_single	MT4,Homo sapiens										1.05882										1
InChI=1S/C46H46N2O4/c49-41(31-48-40(28-34-14-6-2-7-15-34)29-39(46(48)51)27-33-12-4-1-5-13-33)30-38(45(50)47-44-25-22-37-18-10-11-19-43(37)44)26-35-20-23-42(24-21-35)52-32-36-16-8-3-9-17-36/h1-21,23-24,38-40,44H,22,25-32H2,(H,47,50)	5849	1	O=C(CC(Cc1ccc(OCc2ccccc2)cc1)C(=O)NC1CCc2ccccc21)CN1C(=O)C(Cc2ccccc2)CC1Cc1ccccc1	gamma_single	MT4,Homo sapiens										1.05882										1
InChI=1S/C46H50N6O5S/c53-45-42(22-13-26-47-34-49-58(55,56)40-23-24-44-39(29-40)25-27-57-44)52(32-38-20-11-4-12-21-38)43(33-51(45)31-37-18-9-3-10-19-37)41(28-35-14-5-1-6-15-35)50-46(54)48-30-36-16-7-2-8-17-36/h1-12,14-21,23-24,29,34,41-43H,13,22,25-28,30-33H2,(H,47,49)(H2,48,50,54)/p+1	5850	1	O=C(NCc1ccccc1)NC(Cc1ccccc1)C1CN(Cc2ccccc2)C(=O)C(CCCNC=NS(=O)(=O)c2ccc3c(c2)CCO3)[NH+]1Cc1ccccc1	delta_single	Proteinase-activated receptor 1,Homo sapiens										2										1
InChI=1S/C46H58N6O5/c53-43(23-22-35-14-5-1-6-15-35)50-42(30-41-31-47-34-48-41)44(54)49-40(28-36-16-7-2-8-17-36)29-39-24-27-51(45(39)55)25-13-26-52(32-37-18-9-3-10-19-37)46(56)57-33-38-20-11-4-12-21-38/h1,3-6,9-12,14-15,18-21,31,34,36,39-40,42H,2,7-8,13,16-17,22-30,32-33H2,(H,47,48)(H,49,54)(H,50,53)	5852	1	O=C(CCc1ccccc1)NC(Cc1c[nH]cn1)C(=O)NC(CC1CCCCC1)CC1CCN(CCCN(Cc2ccccc2)C(=O)OCc2ccccc2)C1=O	gamma_single	Renin,Homo sapiens										1.09804										1
InChI=1S/C47H52N2O7/c50-41(32-49-40(29-34-11-5-2-6-12-34)30-39(46(49)52)28-33-9-3-1-4-10-33)31-38(45(51)48-44-20-17-36-13-7-8-14-43(36)44)27-35-15-18-42(19-16-35)55-25-26-56-47(53)37-21-23-54-24-22-37/h1-16,18-19,37-40,44H,17,20-32H2,(H,48,51)	5858	1	O=C(CC(Cc1ccc(OCCOC(=O)C2CCOCC2)cc1)C(=O)NC1CCc2ccccc21)CN1C(=O)C(Cc2ccccc2)CC1Cc1ccccc1	gamma_single	MT4,Homo sapiens										1.05882										1
InChI=1S/C50H67N5O13S/c56-44(51-21-8-23-54-22-7-13-45(54)57)16-19-49(66-50(68-67-49)39-32-37-31-38(34-39)35-40(50)33-37)20-27-65-48(60)64-26-17-43(53-47(59)55-24-28-63-29-25-55)46(58)52-41(15-14-36-9-3-1-4-10-36)18-30-69(61,62)42-11-5-2-6-12-42/h1-6,9-12,18,30,37-41,43H,7-8,13-17,19-29,31-35H2,(H,51,56)(H,52,58)(H,53,59)/b30-18+	5862	1	O=C(CCC1(CCOC(=O)OCCC(NC(=O)N2CCOCC2)C(=O)NC(/C=C/S(=O)(=O)c2ccccc2)CCc2ccccc2)OOC2(O1)C1CC3CC(C1)CC2C3)NCCCN1CCCC1=O	gamma_single	Plasmodium falciparum,Plasmodium falciparum										2.32984										1
InChI=1S/C51H73N9O8/c61-49(54-48(42-12-8-7-9-13-42)21-24-59-45-19-20-46(59)35-47(34-45)57-39-52-53-40-57)14-10-5-3-1-2-4-6-11-23-58-36-44(55-56-58)38-68-33-31-66-29-27-64-26-28-65-30-32-67-37-41-15-17-43(18-16-41)51(63)60-25-22-50(60)62/h7-9,12-13,15-18,36,39-40,45-48H,1-6,10-11,14,19-35,37-38H2,(H,54,61)/p+1	5865	1	O=C(CCCCCCCCCCn1cc(COCCOCCOCCOCCOCc2ccc(C(=O)N3CCC3=O)cc2)nn1)NC(CC[NH+]1C2CCC1CC(n1cnnc1)C2)c1ccccc1	beta_single	C-C chemokine receptor type 5,Homo sapiens										1.375										1
InChI=1S/C57H83N9O8/c67-55-27-30-65(55)57(69)48-22-20-45(21-23-48)42-73-37-35-71-33-31-70-32-34-72-36-38-74-43-49-41-63(62-60-49)28-14-6-4-2-1-3-5-13-19-54-61-58-44-66(54)52-39-50-24-25-51(40-52)64(50)29-26-53(46-15-9-7-10-16-46)59-56(68)47-17-11-8-12-18-47/h7,9-10,15-16,20-23,41,44,47,50-53H,1-6,8,11-14,17-19,24-40,42-43H2,(H,59,68)/p+1	5869	1	O=C(NC(CC[NH+]1C2CCC1CC(n1cnnc1CCCCCCCCCCn1cc(COCCOCCOCCOCCOCc3ccc(C(=O)N4CCC4=O)cc3)nn1)C2)c1ccccc1)C1CCCCC1	beta_single	C-C chemokine receptor type 5,Homo sapiens										1.375										1
InChI=1S/C58H55N3O7/c62-46-32-35-49-52(39-46)68-51-19-7-6-17-48(51)55(49)42-24-26-44(27-25-42)57(64)60-36-9-2-5-20-53(63)59-37-12-16-41-22-30-45(31-23-41)61-56(50(58(61)65)18-11-15-40-13-3-1-4-14-40)43-28-33-47(34-29-43)67-54-21-8-10-38-66-54/h1,3-4,6-7,13-14,17,19,22-35,39,50,54,56H,2,5,8-11,15,18,20-21,36-38H2,(H,59,63)(H,60,64)	5870	1	O=C(CCCCCNC(=O)c1ccc(-c2c3ccc(=O)cc-3oc3ccccc23)cc1)NCC#Cc1ccc(N2C(=O)C(CCCc3ccccc3)C2c2ccc(OC3CCCCO3)cc2)cc1	beta_single	Rattus norvegicus,Rattus norvegicus										2.39726										1
InChI=1S/C67H84N18O16S2/c86-53(20-16-42-9-3-1-4-10-42)72-32-54(87)73-35-57(90)82-52-39-103-102-26-24-71-64(97)50(28-46-30-68-40-77-46)81-56(89)34-74-55(88)33-75-63(96)48(13-7-8-23-70-59(92)37-101-38-60(93)79-45-18-14-43(15-19-45)17-21-61(94)85-25-22-62(85)95)80-58(91)36-76-65(98)49(27-44-11-5-2-6-12-44)83-66(99)51(84-67(52)100)29-47-31-69-41-78-47/h1-6,9-12,14-15,18-19,30-31,40-41,48-52H,7-8,13,1…	5876	1	O=C(CCc1ccccc1)NCC(=O)NCC(=O)NC1CSSCCNC(=O)C(Cc2cnc[nH]2)NC(=O)CNC(=O)CNC(=O)C(CCCCNC(=O)COCC(=O)Nc2ccc(CCC(=O)N3CCC3=O)cc2)NC(=O)CNC(=O)C(Cc2ccccc2)NC(=O)C(Cc2cnc[nH]2)NC1=O	beta_single	Placenta growth factor,Homo sapiens										1.2										1
InChI=1S/C68H85N17O16S2/c86-54(21-17-42-9-2-1-3-10-42)73-33-55(87)74-34-56(88)82-52-40-103-102-28-25-71-65(97)51(30-46-32-69-41-78-46)83-68(100)53-14-8-26-84(53)63(95)37-77-64(96)49(80-57(89)35-75-66(98)50(81-58(90)36-76-67(52)99)29-44-31-72-48-12-5-4-11-47(44)48)13-6-7-24-70-59(91)38-101-39-60(92)79-45-19-15-43(16-20-45)18-22-61(93)85-27-23-62(85)94/h1-5,9-12,15-16,19-20,31-32,41,49-53,72H,6-8,1…	5877	1	O=C(CCc1ccccc1)NCC(=O)NCC(=O)NC1CSSCCNC(=O)C(Cc2cnc[nH]2)NC(=O)C2CCCN2C(=O)CNC(=O)C(CCCCNC(=O)COCC(=O)Nc2ccc(CCC(=O)N3CCC3=O)cc2)NC(=O)CNC(=O)C(Cc2c[nH]c3ccccc23)NC(=O)CNC1=O	beta_single	Placenta growth factor,Mus musculus										2.2										1
InChI=1S/C68H85N17O16S2/c86-54(21-17-42-9-2-1-3-10-42)73-33-55(87)75-36-58(90)80-52-40-103-102-28-25-71-64(96)51(30-46-32-69-41-78-46)83-68(100)53-14-8-26-84(53)63(95)37-76-56(88)34-74-57(89)35-77-65(97)50(29-44-31-72-48-12-5-4-11-47(44)48)82-66(98)49(81-67(52)99)13-6-7-24-70-59(91)38-101-39-60(92)79-45-19-15-43(16-20-45)18-22-61(93)85-27-23-62(85)94/h1-5,9-12,15-16,19-20,31-32,41,49-53,72H,6-8,1…	5880	1	O=C(CCc1ccccc1)NCC(=O)NCC(=O)NC1CSSCCNC(=O)C(Cc2cnc[nH]2)NC(=O)C2CCCN2C(=O)CNC(=O)CNC(=O)CNC(=O)C(Cc2c[nH]c3ccccc23)NC(=O)C(CCCCNC(=O)COCC(=O)Nc2ccc(CCC(=O)N3CCC3=O)cc2)NC1=O	beta_single	Placenta growth factor,Mus musculus										2.2										1
InChI=1S/C70H88N18O17S2/c89-55(21-17-43-10-3-1-4-11-43)75-32-56(90)77-35-59(93)84-52-40-106-107-41-53(67(101)73-25-8-2-7-24-72-61(95)38-105-39-62(96)82-46-19-15-44(16-20-46)18-22-63(97)88-27-23-64(88)98)86-69(103)51(29-47-31-71-42-81-47)85-70(104)54-14-9-26-87(54)65(99)37-78-57(91)33-76-58(92)34-79-66(100)50(83-60(94)36-80-68(52)102)28-45-30-74-49-13-6-5-12-48(45)49/h1,3-6,10-13,15-16,19-20,30-31…	5882	1	O=C(CCc1ccccc1)NCC(=O)NCC(=O)NC1CSSCC(C(=O)NCCCCCNC(=O)COCC(=O)Nc2ccc(CCC(=O)N3CCC3=O)cc2)NC(=O)C(Cc2cnc[nH]2)NC(=O)C2CCCN2C(=O)CNC(=O)CNC(=O)CNC(=O)C(Cc2c[nH]c3ccccc23)NC(=O)CNC1=O	beta_single	Placenta growth factor,Mus musculus										2.2										1
InChI=1S/C73H89N21O21S2/c95-54(18-14-42-7-2-1-3-8-42)76-27-55(96)80-33-61(102)89-51-39-116-117-40-52(71(112)84-32-60(101)78-28-56(97)77-29-57(98)81-34-63(104)92-65(106)38-115-37-64(105)87-45-16-12-43(13-17-45)15-19-66(107)94-22-20-67(94)108)91-72(113)50(24-46-26-74-41-86-46)90-73(114)53-11-6-21-93(53)68(109)36-82-58(99)30-79-59(100)31-83-69(110)49(88-62(103)35-85-70(51)111)23-44-25-75-48-10-5-4-9…	5883	1	O=C(CCc1ccccc1)NCC(=O)NCC(=O)NC1CSSCC(C(=O)NCC(=O)NCC(=O)NCC(=O)NCC(=O)NC(=O)COCC(=O)Nc2ccc(CCC(=O)N3CCC3=O)cc2)NC(=O)C(Cc2cnc[nH]2)NC(=O)C2CCCN2C(=O)CNC(=O)CNC(=O)CNC(=O)C(Cc2c[nH]c3ccccc23)NC(=O)CNC1=O	beta_single	Placenta growth factor,Homo sapiens										1.2										1
InChI=1S/C8H13NO/c10-8-5-1-3-7-4-2-6-9(7)8/h7H,1-6H2	5893	1	O=C1CCCC2CCCN12	delta_fused	Integrin alpha-V/beta-3,Homo sapiens										1.53846										1
InChI=1S/C8H7NO2S/c10-7-3-4-9(7)8(11)6-2-1-5-12-6/h1-2,5H,3-4H2	5894	1	O=C1CCN1C(=O)c1cccs1	beta_single	Tryptase,Homo sapiens										1.07059										1
InChI=1S/C9H9NO3S3/c11-7-5-8-10(7)2-1-6(16(8,12)13)9-14-3-4-15-9/h1-2,8H,3-5H2	5901	1	O=C1CC2N1C=CC(=C1SCCS1)S2(=O)=O	beta_fused	Leukocyte elastase,Homo sapiens										3.10577										1
InChI=1S/C10H11NO3S3/c12-8-6-9-11(8)3-2-7(17(9,13)14)10-15-4-1-5-16-10/h2-3,9H,1,4-6H2	2101	2	O=C1CC2N1C=CC(=C1SCCCS1)S2(=O)=O	beta_fused	Leukocyte elastase,Homo sapiens										3.10577										2
InChI=1S/C10H12N2O3S/c13-8-5-9-12(8)7(6-16-9)10(14)11-1-3-15-4-2-11/h6,9H,1-5H2	2102	2	O=C(C1=CSC2CC(=O)N12)N1CCOCC1	beta_fused	Signal peptidase I,Escherichia coli K-12										1.15625										2
InChI=1S/C10H13NO2S/c12-10-4-7-3-9(5-11(7)10)14-8-1-2-13-6-8/h5,7-8H,1-4,6H2	2103	2	O=C1CC2CC(SC3CCOC3)=CN12	beta_fused	Beta-lactamase AmpC,Escherichia coli K-12	Beta-lactamase TEM,Escherichia coli									3.14286	1.97872									1	1
InChI=1S/C10H9NO2S/c12-9-7-14-10(13)6-11(9)8-4-2-1-3-5-8/h1-5H,6-7H2	2107	2	O=C1CN(c2ccccc2)C(=O)CS1	delta_single	Angiotensin II receptor (AT-1) type-1,Rattus norvegicus	Angiotensin-converting enzyme,Oryctolagus cuniculus									1.68182	2.2381									1	1
InChI=1S/C12H10N2O/c15-12-10-5-1-2-6-11(10)13-8-9-4-3-7-14(9)12/h1-3,5-9H,4H2	2115	2	O=C1c2ccccc2N=CC2CC=CN12	epsilon_fused	K562,Homo sapiens										1.55462										2
InChI=1S/C12H11N3O2S2/c1-7(8-5-18-6-13-8)10(16)14-9-11(17)15-3-2-4-19-12(9)15/h2-3,5-6,9,12H,1,4H2,(H,14,16)	2117	2	C=C(C(=O)NC1C(=O)N2C=CCSC12)c1cscn1	beta_fused	Solute carrier organic anion transporter family member 1B1,Homo sapiens	Solute carrier organic anion transporter family member 1B3,Homo sapiens									1.44444	2.16667									1	1
InChI=1S/C12H15NO/c14-12-7-4-9-13(12)10-8-11-5-2-1-3-6-11/h1-3,5-6H,4,7-10H2	2128	2	O=C1CCCN1CCc1ccccc1	gamma_single	Cavia porcellus,Cavia porcellus										2.81818										1
InChI=1S/C12H18N4O4/c17-9(8-16-6-3-13-11(19)12(16)20)14-7-10(18)15-4-1-2-5-15/h1-8H2,(H,13,19)(H,14,17)	2132	2	O=C(CN1CCNC(=O)C1=O)NCC(=O)N1CCCC1	delta_single	Hamster,Cricetinae	Leukocyte elastase,Homo sapiens									1.25	3.10577									1	1
InChI=1S/C13H12N2O/c1-9-6-10-7-14-12-5-3-2-4-11(12)13(16)15(10)8-9/h2-5,7,10H,1,6,8H2	2138	2	C=C1CC2C=Nc3ccccc3C(=O)N2C1	epsilon_fused	CH1,Homo sapiens	L1210,Mus musculus									2.08333	7									1	1
InChI=1S/C13H12N2O3/c16-13-9-4-11-12(18-7-17-11)5-10(9)14-6-8-2-1-3-15(8)13/h4-6,8H,1-3,7H2	2140	2	O=C1c2cc3c(cc2N=CC2CCCN12)OCO3	epsilon_fused	CH1,Homo sapiens										2.08333										1
InChI=1S/C13H13NO4S/c15-11-6-12-14(11)10(8-19(12)17)13(16)18-7-9-4-2-1-3-5-9/h1-5,10,12H,6-8H2	2145	2	O=C(OCc1ccccc1)C1CS(=O)C2CC(=O)N12	beta_fused	Leukocyte elastase,Homo sapiens										1.55288										2
InChI=1S/C13H15NOS/c15-13-11(8-10-4-2-1-3-5-10)9-12-14(13)6-7-16-12/h1-5,11-12H,6-9H2	2148	2	O=C1C(Cc2ccccc2)CC2SCCN12	gamma_fused	Dipeptidyl peptidase IV,Homo sapiens										1.16667										1
InChI=1S/C13H21NOS/c15-13-11(8-10-4-2-1-3-5-10)9-12-14(13)6-7-16-12/h10-12H,1-9H2	2151	2	O=C1C(CC2CCCCC2)CC2SCCN12	gamma_fused	Dipeptidyl peptidase IV,Homo sapiens										1.16667										1
InChI=1S/C14H11N5O2S/c20-13-6-21-11-4-2-1-3-10(11)19(13)5-12-16-14(18-17-12)9-7-22-8-15-9/h1-4,7-8H,5-6H2,(H,16,17,18)	2152	2	O=C1COc2ccccc2N1Cc1nnc(-c2cscn2)[nH]1	delta_fused	Sodium/glucose cotransporter 2,Homo sapiens										1.13846										2
InChI=1S/C14H13N3O2S/c18-12-8-10(13(19)16-14-15-6-7-20-14)9-17(12)11-4-2-1-3-5-11/h1-7,10H,8-9H2,(H,15,16,19)	2154	2	O=C(Nc1nccs1)C1CC(=O)N(c2ccccc2)C1	gamma_single	Photoreceptor-specific nuclear receptor,Homo sapiens										40										1
InChI=1S/C14H14N2O3/c17-14-10-6-12-13(19-5-4-18-12)7-11(10)15-8-9-2-1-3-16(9)14/h6-9H,1-5H2	2158	2	O=C1c2cc3c(cc2N=CC2CCCN12)OCCO3	epsilon_fused	CH1,Homo sapiens										2.08333										1
InChI=1S/C14H15N5O5S3/c20-10(14-16-1-4-25-14)5-17-11(21)7-18-2-3-19(8-12(18)22)27(23,24)13-6-15-9-26-13/h1,4,6,9H,2-3,5,7-8H2,(H,17,21)	2161	2	O=C(CN1CCN(S(=O)(=O)c2cncs2)CC1=O)NCC(=O)c1nccs1	delta_single	Coagulation factor X,Homo sapiens										1.67391										1
InChI=1S/C14H15N5O5S3/c20-11(14-15-1-4-25-14)6-16-12(21)7-18-2-3-19(8-13(18)22)27(23,24)10-5-17-26-9-10/h1,4-5,9H,2-3,6-8H2,(H,16,21)	2162	2	O=C(CN1CCN(S(=O)(=O)c2cnsc2)CC1=O)NCC(=O)c1nccs1	delta_single	Coagulation factor X,Homo sapiens	Thrombin,Homo sapiens									1.67391	2.47826									1	1
InChI=1S/C14H17NOS/c16-14-12(10-13-15(14)8-9-17-13)7-6-11-4-2-1-3-5-11/h1-5,12-13H,6-10H2	2168	2	O=C1C(CCc2ccccc2)CC2SCCN12	gamma_fused	Dipeptidyl peptidase IV,Homo sapiens										1.16667										1
InChI=1S/C14H21N3O/c18-14-13-2-1-8-16(13)10-11-17(14)9-5-12-3-6-15-7-4-12/h1-2,8,12,15H,3-7,9-11H2/p+1	2171	2	O=C1c2cccn2CCN1CCC1CC[NH2+]CC1	delta_fused	Integrin alpha-IIb/beta-3,Homo sapiens										1.70213										2
InChI=1S/C14H21N5O2/c20-13-4-1-2-6-17(13)7-3-5-14(21)18-8-9-19-11-15-16-12(19)10-18/h11H,1-10H2	2172	2	O=C1CCCCN1CCCC(=O)N1CCn2cnnc2C1	delta_single	Dipeptidyl peptidase IV,Homo sapiens										1.16667										1
InChI=1S/C15H12N4O/c20-15-13-3-1-2-4-14(13)16-8-12-5-10(9-19(12)15)11-6-17-18-7-11/h1-4,6-9,12H,5H2,(H,17,18)	2176	2	O=C1c2ccccc2N=CC2CC(c3cn[nH]c3)=CN12	epsilon_fused	K562,Homo sapiens										1.55462										2
InChI=1S/C15H13N5O2/c21-15-13-18-17-12(14-16-6-9-22-14)20(13)8-7-19(15)10-11-4-2-1-3-5-11/h1-6,9H,7-8,10H2	2180	2	O=C1c2nnc(-c3ncco3)n2CCN1Cc1ccccc1	delta_fused	P2X purinoceptor 7,Homo sapiens										1.08088										1
InChI=1S/C15H13N5O2/c21-15-14-17-16-13(12-6-9-22-18-12)20(14)8-7-19(15)10-11-4-2-1-3-5-11/h1-6,9H,7-8,10H2	2181	2	O=C1c2nnc(-c3ccon3)n2CCN1Cc1ccccc1	delta_fused	P2X purinoceptor 7,Homo sapiens										1.08088										1
InChI=1S/C15H13N5O2/c21-15-14-18-17-13(12-8-16-10-22-12)20(14)7-6-19(15)9-11-4-2-1-3-5-11/h1-5,8,10H,6-7,9H2	2182	2	O=C1c2nnc(-c3cnco3)n2CCN1Cc1ccccc1	delta_fused	P2X purinoceptor 7,Homo sapiens										1.08088										1
InChI=1S/C15H13N5O2/c21-15-14-18-17-13(12-9-22-10-16-12)20(14)7-6-19(15)8-11-4-2-1-3-5-11/h1-5,9-10H,6-8H2	2183	2	O=C1c2nnc(-c3cocn3)n2CCN1Cc1ccccc1	delta_fused	P2X purinoceptor 7,Homo sapiens										1.08088										1
InChI=1S/C15H13N5OS/c21-15-13-18-17-12(14-16-6-9-22-14)20(13)8-7-19(15)10-11-4-2-1-3-5-11/h1-6,9H,7-8,10H2	2184	2	O=C1c2nnc(-c3nccs3)n2CCN1Cc1ccccc1	delta_fused	P2X purinoceptor 7,Homo sapiens	P2X purinoceptor 7,Rattus norvegicus									1.08088	2.77143									1	1
InChI=1S/C15H15N3O3S/c19-15-11(4-3-9-18(15)10-7-8-10)14-16-12-5-1-2-6-13(12)22(20,21)17-14/h1-2,4-6,10H,3,7-9H2,(H,16,17)	2189	2	O=C1C(C2=NS(=O)(=O)c3ccccc3N2)=CCCN1C1CC1	delta_single	Hepatitis C virus,Hepatitis C virus										1.17526										2
InChI=1S/C15H16N4O/c20-15-14-17-16-13(12-6-7-12)19(14)9-8-18(15)10-11-4-2-1-3-5-11/h1-5,12H,6-10H2	2192	2	O=C1c2nnc(C3CC3)n2CCN1Cc1ccccc1	delta_fused	P2X purinoceptor 7,Homo sapiens										1.08088										1
InChI=1S/C15H18N4O2/c20-15-2-1-6-18(15)12-8-14-13(3-5-16-19(14)9-12)17-11-4-7-21-10-11/h3,5,8-9,11,17H,1-2,4,6-7,10H2	2195	2	O=C1CCCN1c1cc2c(NC3CCOC3)ccnn2c1	gamma_single	Tyrosine-protein kinase JAK1,Homo sapiens	Tyrosine-protein kinase JAK3,Homo sapiens									1.5	1.27273									1	1
InChI=1S/C15H19N3O2/c19-14-13(10-12-4-2-1-3-5-12)11-18(14)15(20)17-8-6-16-7-9-17/h1-5,13,16H,6-11H2	2196	2	O=C1C(Cc2ccccc2)CN1C(=O)N1CCNCC1	beta_single	Tryptase,Homo sapiens										1.07059										2
InChI=1S/C15H19N5O2S/c21-11-7-16-5-6-20(11)10-8-23-13-12(10)18-15(19-14(13)22)17-9-3-1-2-4-9/h8-9,16H,1-7H2,(H2,17,18,19,22)	2197	2	O=C1CNCCN1c1csc2c(=O)[nH]c(NC3CCCC3)nc12	delta_single	Phosphodiesterase 7A,Homo sapiens										1.2										1
InChI=1S/C15H23N3O/c19-15-14-3-1-9-17(14)10-2-11-18(15)12-6-13-4-7-16-8-5-13/h1,3,9,13,16H,2,4-8,10-12H2/p+1	2198	2	O=C1c2cccn2CCCN1CCC1CC[NH2+]CC1	epsilon_fused	Integrin alpha-IIb/beta-3,Homo sapiens										1.70213										2
InChI=1S/C16H12N2O3S2/c19-15-13(8-12-4-1-2-6-17-12)16-18(15)9-11(10-23(16,20)21)14-5-3-7-22-14/h1-9,16H,10H2/b13-8-	2201	2	O=C1/C(=C/c2ccccn2)C2N1C=C(c1cccs1)CS2(=O)=O	beta_fused	Beta-lactamase,Enterobacter cloacae										2.01887										1
InChI=1S/C16H12N2OS/c19-16-15-13(10-18(16)12-7-8-12)17-14(20-15)9-6-11-4-2-1-3-5-11/h1-5,12H,7-8,10H2	2202	2	O=C1c2sc(C#Cc3ccccc3)nc2CN1C1CC1	gamma_fused	Metabotropic glutamate receptor 5,Homo sapiens										1.21229										2
InChI=1S/C16H13N5O2S3/c17-12(11-6-24-8-19-11)14(22)20-13-15(23)21-4-9(5-25-16(13)21)1-2-10-3-18-7-26-10/h1-4,6-8,13,16-17H,5H2,(H,20,22)/b2-1-,17-12?	2205	2	N=C(C(=O)NC1C(=O)N2C=C(/C=C\c3cncs3)CSC12)c1cscn1	beta_fused	Solute carrier organic anion transporter family member 1B1,Homo sapiens	Solute carrier organic anion transporter family member 1B3,Homo sapiens									1.44444	2.16667									1	1
InChI=1S/C16H13NOS/c18-16-12-6-2-1-5-11(12)15-13-7-3-4-8-14(13)17(16)9-10-19-15/h1-8,15H,9-10H2	2208	2	O=C1c2ccccc2C2SCCN1c1ccccc12	epsilon_bridged	Human immunodeficiency virus type 1 reverse transcriptase,Human immunodeficiency virus 1										4										2
InChI=1S/C16H14N6O/c23-16-15-20-19-14(13-7-4-8-17-18-13)22(15)10-9-21(16)11-12-5-2-1-3-6-12/h1-8H,9-11H2	2213	2	O=C1c2nnc(-c3cccnn3)n2CCN1Cc1ccccc1	delta_fused	P2X purinoceptor 7,Homo sapiens										1.08088										1
InChI=1S/C16H15N3O2/c20-15-16(21)19(14-8-4-5-9-17-14)11-10-18(15)12-13-6-2-1-3-7-13/h1-9H,10-12H2	2214	2	O=C1C(=O)N(c2ccccn2)CCN1Cc1ccccc1	epsilon_fused	P2X purinoceptor 7,Homo sapiens										1.08088										2
InChI=1S/C16H16N2O3/c19-16-13-9-12(21-15-4-2-8-20-15)5-6-14(13)17-10-11-3-1-7-18(11)16/h1,5-7,9-11,15H,2-4,8H2	2223	2	O=C1c2cc(OC3CCCO3)ccc2N=CC2CC=CN12	epsilon_fused	CH1,Homo sapiens	L1210,Mus musculus									2.08333	7									1	1
InChI=1S/C16H16N6O3/c23-14-12-13(20-6-5-19-12)15(22(14)11-3-1-2-4-18-11)25-16(24)21-9-7-17-8-10-21/h1-6,15,17H,7-10H2/p+1	2226	2	O=C(OC1c2nccnc2C(=O)N1c1ccccn1)N1CC[NH2+]CC1	gamma_fused	GABA-A receptor; anion channel,Rattus norvegicus										2.27273										1
InChI=1S/C16H17N5O2/c22-14-10-19-15-16(21(14)12-3-6-23-7-4-12)20-13(9-18-15)11-2-1-5-17-8-11/h1-2,5,8-9,12H,3-4,6-7,10H2,(H,18,19)	2227	2	O=C1CNc2ncc(-c3cccnc3)nc2N1C1CCOCC1	delta_fused	Serine/threonine-protein kinase mTOR,Homo sapiens										1.04545										1
InChI=1S/C16H17NO3S/c18-14-10-15-17(14)13(11-21-15)16(19)20-9-5-4-8-12-6-2-1-3-7-12/h1-3,6-7,11,15H,4-5,8-10H2	2230	2	O=C(OCCCCc1ccccc1)C1=CSC2CC(=O)N12	beta_fused	Signal peptidase I,Escherichia coli K-12										1.15625										2
InChI=1S/C16H18N2OS/c19-15-16(17-10-11-20-16)13-8-4-5-9-14(13)18(15)12-6-2-1-3-7-12/h4-5,8-10,12H,1-3,6-7,11H2	2231	2	O=C1N(C2CCCCC2)c2ccccc2C12N=CCS2	gamma_fused	HT-29,Homo sapiens										1.97561										1
InChI=1S/C16H18N4O/c21-16-15-18-17-14(13-7-4-8-13)20(15)10-9-19(16)11-12-5-2-1-3-6-12/h1-3,5-6,13H,4,7-11H2	2232	2	O=C1c2nnc(C3CCC3)n2CCN1Cc1ccccc1	delta_fused	P2X purinoceptor 7,Homo sapiens										1.08088										1
InChI=1S/C16H19N3OS/c20-15-14-13(10-19(15)12-8-2-1-3-9-12)18-16(21-14)17-11-6-4-5-7-11/h1-3,8-9,11,13-14H,4-7,10H2,(H,17,18)	2234	2	O=C1C2SC(NC3CCCC3)=NC2CN1c1ccccc1	gamma_fused	MAP kinase p38 alpha,Homo sapiens	PBMC,Homo sapiens									1.71429	1.2									1	1
InChI=1S/C16H21NO2/c18-15-8-10-16(9-4-5-11-17(15)16)13-19-12-14-6-2-1-3-7-14/h1-3,6-7H,4-5,8-13H2	2239	2	O=C1CCC2(COCc3ccccc3)CCCCN12	gamma_fused	Alpha-mannosidase,Canavalia ensiformis	Beta-galactosidase,Bos taurus									2	3									1	1
InChI=1S/C16H23N3O/c20-16-13-18(12-14-5-4-8-17-11-14)9-10-19(16)15-6-2-1-3-7-15/h1-3,6-7,14,17H,4-5,8-13H2/p+2	2242	2	O=C1C[NH+](CC2CCC[NH2+]C2)CCN1c1ccccc1	delta_single	Renin,Homo sapiens										1.09804										1
InChI=1S/C16H23N5O5/c22-12-6-17-13(23)7-19-15(25)11-5-4-9-2-1-3-10(16(26)21(9)11)20-14(24)8-18-12/h9-11H,1-8H2,(H,17,23)(H,18,22)(H,19,25)(H,20,24)	2243	2	O=C1CNC(=O)CNC(=O)C2CCC3CCCC(NC(=O)CN1)C(=O)N32	epsilon_bridged	Integrin alpha-V/beta-3,Homo sapiens	Integrin alpha-V/beta-5,Homo sapiens									1.53846	1.75									1	1
InChI=1S/C17H12N4O/c22-14-6-3-8-21(14)16-12-5-2-1-4-11(12)15-17(16)20-9-7-18-13(20)10-19-15/h1-7,9-10,16H,8H2	2245	2	O=C1C=CCN1C1c2ccccc2-c2ncc3nccn3c21	gamma_single	Glutamate NMDA receptor,Rattus norvegicus										7										1
InChI=1S/C17H13N3O/c21-17-14-9-16-15(18-6-7-19-16)8-13(14)11-20(17)10-12-4-2-1-3-5-12/h1-9H,10-11H2	2248	2	O=C1c2cc3nccnc3cc2CN1Cc1ccccc1	gamma_fused	Human immunodeficiency virus type 1 integrase,Human immunodeficiency virus 1										2.32143										2
InChI=1S/C17H13N3O2/c21-15-9-16(22)20(17(15)11-4-2-1-3-5-11)12-6-7-13-14(8-12)19-10-18-13/h1-8,10,17H,9H2,(H,18,19)	2250	2	O=C1CC(=O)N(c2ccc3nc[nH]c3c2)C1c1ccccc1	gamma_single	Glutaminyl-peptide cyclotransferase,Homo sapiens										1.4										2
InChI=1S/C17H13N3O3/c21-16-11-22-14-9-5-4-8-13(14)20(16)10-15-18-17(19-23-15)12-6-2-1-3-7-12/h1-9H,10-11H2	2252	2	O=C1COc2ccccc2N1Cc1nc(-c2ccccc2)no1	delta_fused	Metabotropic glutamate receptor 5,Homo sapiens										1.21229										2
InChI=1S/C17H14N4O2/c22-16-11-23-14-9-5-4-8-13(14)21(16)10-15-18-17(20-19-15)12-6-2-1-3-7-12/h1-9H,10-11H2,(H,18,19,20)	2254	2	O=C1COc2ccccc2N1Cc1nnc(-c2ccccc2)[nH]1	delta_fused	Sodium/glucose cotransporter 2,Homo sapiens										1.13846										2
InChI=1S/C17H14N6O3/c24-17-16-21-20-15(12-8-18-3-4-19-12)23(16)6-5-22(17)9-11-1-2-13-14(7-11)26-10-25-13/h1-4,7-8H,5-6,9-10H2	2255	2	O=C1c2nnc(-c3cnccn3)n2CCN1Cc1ccc2c(c1)OCO2	delta_fused	P2X purinoceptor 7,Homo sapiens										1.08088										1
InChI=1S/C17H15N5O/c23-17-16-20-19-15(14-6-8-18-9-7-14)22(16)11-10-21(17)12-13-4-2-1-3-5-13/h1-9H,10-12H2	2259	2	O=C1c2nnc(-c3ccncc3)n2CCN1Cc1ccccc1	delta_fused	P2X purinoceptor 7,Homo sapiens										1.08088										1
InChI=1S/C17H15N5O2/c23-17-15-11-13(12-24-16-3-1-2-6-19-16)20-22(15)10-9-21(17)14-4-7-18-8-5-14/h1-8,11H,9-10,12H2/p+1	2260	2	O=C1c2cc(COc3ccccn3)nn2CCN1c1cc[nH+]cc1	delta_fused	Metabotropic glutamate receptor 3,Rattus norvegicus										1.33898										2
InChI=1S/C17H15NO/c19-17-16(15-9-5-2-6-10-15)11-12-18(17)13-14-7-3-1-4-8-14/h1-11H,12-13H2	2262	2	O=C1C(c2ccccc2)=CCN1Cc1ccccc1	gamma_single	Oryza sativa,Oryza sativa										4										1
InChI=1S/C17H16N6O6S2/c24-12(17-18-4-7-30-17)8-19-14(25)9-22-5-6-23(10-15(22)26)31(27,28)13-3-1-2-11-16(13)21-29-20-11/h1-4,7H,5-6,8-10H2,(H,19,25)	2266	2	O=C(CN1CCN(S(=O)(=O)c2cccc3nonc23)CC1=O)NCC(=O)c1nccs1	delta_single	Coagulation factor X,Homo sapiens	Thrombin,Homo sapiens									1.67391	2.47826									1	1
InChI=1S/C17H17N3O/c21-17-14-9-16-15(18-6-7-19-16)8-13(14)11-20(17)10-12-4-2-1-3-5-12/h1-5,8-9,18-19H,6-7,10-11H2	2267	2	O=C1c2cc3c(cc2CN1Cc1ccccc1)NCCN3	gamma_fused	Human immunodeficiency virus type 1 integrase,Human immunodeficiency virus 1										2.32143										1
InChI=1S/C17H17N9OS/c27-15-9-18-1-3-25(15)10-12-5-14(28-24-12)23-16-17-20-8-13(11-6-21-22-7-11)26(17)4-2-19-16/h2,4-8,18H,1,3,9-10H2,(H,19,23)(H,21,22)/p+1	2271	2	O=C1C[NH2+]CCN1Cc1cc(Nc2nccn3c(-c4cn[nH]c4)cnc23)sn1	delta_single	Serine/threonine-protein kinase Aurora-A,Homo sapiens	Serine/threonine-protein kinase Aurora-B,Homo sapiens									2.35714	2									1	1
InChI=1S/C17H18N2O2/c20-17-5-3-11-19(17)12-13-21-15-8-6-14(7-9-15)16-4-1-2-10-18-16/h1-2,4,6-10H,3,5,11-13H2	2276	2	O=C1CCCN1CCOc1ccc(-c2ccccn2)cc1	gamma_single	Cathepsin S,Homo sapiens										1.27119										1
InChI=1S/C17H22N2O2/c20-16-11-10-15(19(16)14-8-4-5-9-14)17(21)18-12-13-6-2-1-3-7-13/h1-3,6-7,14-15H,4-5,8-12H2,(H,18,21)	2284	2	O=C(NCc1ccccc1)C1CCC(=O)N1C1CCCC1	gamma_single	P2X purinoceptor 7,Homo sapiens										1.08088										2
InChI=1S/C17H23NO/c19-17-15(13-14-7-3-1-4-8-14)11-12-18(17)16-9-5-2-6-10-16/h1,3-4,7-8,15-16H,2,5-6,9-13H2	2288	2	O=C1C(Cc2ccccc2)CCN1C1CCCCC1	gamma_single	11-beta-hydroxysteroid dehydrogenase 1,Homo sapiens										1.21212										1
InChI=1S/C17H25N3OS/c21-17-4-2-1-3-14-9-13-5-7-19(11-16(13)20(14)17)8-6-15-10-18-12-22-15/h10,12-14,16H,1-9,11H2/p+1	2290	2	O=C1CCCCC2CC3CC[NH+](CCc4cncs4)CC3N12	epsilon_fused	Baculoviral IAP repeat-containing protein 2,Homo sapiens										1.21212										1
InChI=1S/C18H13N3O2S/c22-17-18(10-23-15-6-3-7-19-16(15)18)13-4-1-2-5-14(13)21(17)8-12-9-24-11-20-12/h1-7,9,11H,8,10H2	2296	2	O=C1N(Cc2cscn2)c2ccccc2C12COc1cccnc12	gamma_fused	Cytochrome P450 3A4,Homo sapiens	Sodium channel protein type IX alpha subunit,Homo sapiens									8.98113	1.66234									1	1
InChI=1S/C18H13NO2/c20-17-10-9-16(14-7-3-4-8-15(14)17)19-11-12-5-1-2-6-13(12)18(19)21/h1-9H,10-11H2	2299	2	O=C1CC=C(N2Cc3ccccc3C2=O)c2ccccc21	gamma_fused	Rattus norvegicus,Rattus norvegicus										2.39726										1
InChI=1S/C18H14N2O3S2/c21-17-16(10-13-6-4-5-9-19-13)18-20(17)11-15(12-25(18,22)23)24-14-7-2-1-3-8-14/h1-11,18H,12H2/b16-10-	2300	2	O=C1/C(=C/c2ccccn2)C2N1C=C(Sc1ccccc1)CS2(=O)=O	beta_fused	Beta-lactamase,Enterobacter cloacae	Beta-lactamase AmpC,Escherichia coli K-12									2.01887	3.14286									1	1
InChI=1S/C18H14N2O5S2/c21-17-16(10-13-6-4-5-9-19-13)18-20(17)11-15(12-26(18,22)23)27(24,25)14-7-2-1-3-8-14/h1-11,18H,12H2/b16-10-	2301	2	O=C1/C(=C/c2ccccn2)C2N1C=C(S(=O)(=O)c1ccccc1)CS2(=O)=O	beta_fused	Beta-lactamase,Enterobacter cloacae	Beta-lactamase AmpC,Escherichia coli K-12									2.01887	3.14286									1	1
InChI=1S/C18H14N4O5/c23-14-8-9-18(15(24)20-17(26)21-16(18)25)22(14)11-6-7-13(19-10-11)27-12-4-2-1-3-5-12/h1-7,10H,8-9H2,(H2,20,21,24,25,26)	2302	2	O=C1NC(=O)C2(CCC(=O)N2c2ccc(Oc3ccccc3)nc2)C(=O)N1	gamma_spiro	Matrix metalloproteinase 13,Homo sapiens										2										2
InChI=1S/C18H15N3O3/c22-17-12-23-15-9-5-4-8-14(15)21(17)11-10-16-19-18(20-24-16)13-6-2-1-3-7-13/h1-9H,10-12H2	2305	2	O=C1COc2ccccc2N1CCc1nc(-c2ccccc2)no1	delta_fused	Metabotropic glutamate receptor 5,Homo sapiens										1.21229										2
InChI=1S/C18H15N5O/c24-18-16-6-3-12(8-13(16)10-22(18)14-4-5-14)17-11-23(21-20-17)15-2-1-7-19-9-15/h1-3,6-9,11,14H,4-5,10H2	2306	2	O=C1c2ccc(-c3cn(-c4cccnc4)nn3)cc2CN1C1CC1	gamma_fused	Metabotropic glutamate receptor 1,Homo sapiens										5.20896										1
InChI=1S/C18H16N2O2S/c21-18-9-4-10-20(18)13-5-3-6-14(11-13)22-12-17-19-15-7-1-2-8-16(15)23-17/h1-3,5-8,11H,4,9-10,12H2	2308	2	O=C1CCCN1c1cccc(OCc2nc3ccccc3s2)c1	gamma_single	Cysteinyl leukotriene receptor,Homo sapiens										2										1
InChI=1S/C18H16N4O3/c23-18-12-25-15-9-5-4-8-14(15)22(18)10-16-19-17(21-20-16)11-24-13-6-2-1-3-7-13/h1-9H,10-12H2,(H,19,20,21)	2313	2	O=C1COc2ccccc2N1Cc1nnc(COc2ccccc2)[nH]1	delta_fused	Sodium/glucose cotransporter 2,Homo sapiens										1.13846										2
InChI=1S/C18H17N3O2/c22-18-9-4-10-21(18)13-5-3-6-14(11-13)23-12-17-19-15-7-1-2-8-16(15)20-17/h1-3,5-8,11H,4,9-10,12H2,(H,19,20)	2316	2	O=C1CCCN1c1cccc(OCc2nc3ccccc3[nH]2)c1	gamma_single	Arachidonate 5-lipoxygenase,Rattus norvegicus										6										1
InChI=1S/C18H17N3O4S/c22-16(20-13-5-6-13)7-4-12-10-21-17(23)15(18(21)26(24,25)11-12)9-14-3-1-2-8-19-14/h1-4,7-10,13,18H,5-6,11H2,(H,20,22)/b7-4+,15-9-	2317	2	O=C(/C=C/C1=CN2C(=O)/C(=C/c3ccccn3)C2S(=O)(=O)C1)NC1CC1	beta_fused	Beta-lactamase,Enterobacter cloacae	Beta-lactamase AmpC,Escherichia coli K-12									2.01887	3.14286									1	1
InChI=1S/C18H17NO3/c20-17-11-16(19(17)12-14-7-3-1-4-8-14)18(21)22-13-15-9-5-2-6-10-15/h1-10,16H,11-13H2	2322	2	O=C(OCc1ccccc1)C1CC(=O)N1Cc1ccccc1	beta_single	Human immunodeficiency virus type 1 protease,Human immunodeficiency virus 1										1.04878										2
InChI=1S/C18H17NOS/c20-18-17(14-8-10-21-12-14)16(13-5-2-1-3-6-13)11-15-7-4-9-19(15)18/h1-3,5-6,8,10,12,15H,4,7,9,11H2	2323	2	O=C1C(c2ccsc2)=C(c2ccccc2)CC2CCCN12	delta_fused	HCT-116,Homo sapiens										2.30645										2
InChI=1S/C18H17NOS/c20-18-17(16-9-5-11-21-16)15(13-6-2-1-3-7-13)12-14-8-4-10-19(14)18/h1-3,5-7,9,11,14H,4,8,10,12H2	2324	2	O=C1C(c2cccs2)=C(c2ccccc2)CC2CCCN12	delta_fused	HCT-116,Homo sapiens										2.30645										2
InChI=1S/C18H18N4O2/c23-18-2-1-7-22(18)8-9-24-14-5-3-13(4-6-14)15-10-16-17(11-19-15)21-12-20-16/h3-6,10-12H,1-2,7-9H2,(H,20,21)	2330	2	O=C1CCCN1CCOc1ccc(-c2cc3[nH]cnc3cn2)cc1	gamma_single	Cathepsin S,Homo sapiens										1.27119										1
InChI=1S/C18H18N6O/c25-18-17-22-21-16(14-8-9-19-20-14)24(17)11-15(13-6-7-13)23(18)10-12-4-2-1-3-5-12/h1-5,8-9,13,15H,6-7,10-11H2,(H,19,20)	2331	2	O=C1c2nnc(-c3cc[nH]n3)n2CC(C2CC2)N1Cc1ccccc1	delta_fused	P2X purinoceptor 7,Homo sapiens	P2X purinoceptor 7,Rattus norvegicus									1.08088	2.77143									1	1
InChI=1S/C18H19N3O2/c22-17-11-14(13-21(17)16-9-5-2-6-10-16)12-19-18(23)20-15-7-3-1-4-8-15/h1-10,14H,11-13H2,(H2,19,20,23)	2333	2	O=C(NCC1CC(=O)N(c2ccccc2)C1)Nc1ccccc1	gamma_single	Onchocerca ochengi,Onchocerca ochengi										1.22222										1
InChI=1S/C18H19N3O2/c22-17-9-8-16(21(17)13-15-7-4-10-19-11-15)18(23)20-12-14-5-2-1-3-6-14/h1-7,10-11,16H,8-9,12-13H2,(H,20,23)	2334	2	O=C(NCc1ccccc1)C1CCC(=O)N1Cc1cccnc1	gamma_single	P2X purinoceptor 7,Homo sapiens										1.08088										2
InChI=1S/C18H19N5O3S2/c24-18-14(5-10-23(18)11-9-20-13-3-7-19-8-4-13)22-28(25,26)17-12-15-16(27-17)2-1-6-21-15/h1-4,6-8,12,14,22H,5,9-11H2,(H,19,20)/p+1	2336	2	O=C1C(NS(=O)(=O)c2cc3ncccc3s2)CCN1CCNc1cc[nH+]cc1	gamma_single	Coagulation factor X,Oryctolagus cuniculus										2.47826										2
InChI=1S/C18H19N5O3S2/c24-18-15(5-10-23(18)11-9-20-14-3-7-19-8-4-14)22-28(25,26)16-12-13-2-1-6-21-17(13)27-16/h1-4,6-8,12,15,22H,5,9-11H2,(H,19,20)/p+1	2337	2	O=C1C(NS(=O)(=O)c2cc3cccnc3s2)CCN1CCNc1cc[nH+]cc1	gamma_single	Coagulation factor X,Oryctolagus cuniculus										1.23913										2
InChI=1S/C18H20N2OS/c21-18-17-6-2-1-4-14(17)12-20(18)15-7-9-19(10-8-15)13-16-5-3-11-22-16/h1-6,11,15H,7-10,12-13H2/p+1	2342	2	O=C1c2ccccc2CN1C1CC[NH+](Cc2cccs2)CC1	gamma_fused	Poly [ADP-ribose] polymerase-1,Mus musculus										1.56522										2
InChI=1S/C18H20N4O3S/c23-15(17-20-7-9-26-17)11-21-16(24)12-22-8-6-19-14(18(22)25)10-13-4-2-1-3-5-13/h1-5,7,9,14,19H,6,8,10-12H2,(H,21,24)	2343	2	O=C(CN1CCNC(Cc2ccccc2)C1=O)NCC(=O)c1nccs1	delta_single	Coagulation factor X,Homo sapiens	Thrombin,Homo sapiens									1.67391	2.47826									1	1
InChI=1S/C18H20N4O3S/c23-15(17-20-7-9-26-17)11-21-16(24)12-22-8-6-19-14(18(22)25)10-13-4-2-1-3-5-13/h1-5,7,9,14,19H,6,8,10-12H2,(H,21,24)/p+1	2344	2	O=C(CN1CC[NH2+]C(Cc2ccccc2)C1=O)NCC(=O)c1nccs1	delta_single	Coagulation factor X,Homo sapiens										1.67391										1
InChI=1S/C18H20N4O3S/c23-15(18-19-6-9-26-18)10-20-16(24)12-22-8-7-21(13-17(22)25)11-14-4-2-1-3-5-14/h1-6,9H,7-8,10-13H2,(H,20,24)/p+1	2345	2	O=C(CN1CC[NH+](Cc2ccccc2)CC1=O)NCC(=O)c1nccs1	delta_single	Coagulation factor X,Homo sapiens										1.67391										1
InChI=1S/C18H21N3O2S/c22-16-7-4-10-21(16)17-13-19-18(24-17)20-11-8-15(9-12-20)23-14-5-2-1-3-6-14/h1-3,5-6,13,15H,4,7-12H2	2347	2	O=C1CCCN1c1cnc(N2CCC(Oc3ccccc3)CC2)s1	gamma_single	Acyl-CoA desaturase 1,Rattus norvegicus										2										1
InChI=1S/C18H21N3O3S/c22-18-14(9-6-12-21(18)13-7-2-1-3-8-13)17-19-15-10-4-5-11-16(15)25(23,24)20-17/h4-5,9-11,13H,1-3,6-8,12H2,(H,19,20)	2348	2	O=C1C(C2=NS(=O)(=O)c3ccccc3N2)=CCCN1C1CCCCC1	delta_single	Hepatitis C virus,Hepatitis C virus										1.17526										2
InChI=1S/C18H21N5O/c24-16-11-21-17-18(23(16)12-13-5-2-1-3-6-13)22-15(10-20-17)14-7-4-8-19-9-14/h4,7-10,13H,1-3,5-6,11-12H2,(H,20,21)	2349	2	O=C1CNc2ncc(-c3cccnc3)nc2N1CC1CCCCC1	delta_fused	Serine/threonine-protein kinase mTOR,Homo sapiens										1.04545										1
InChI=1S/C18H22N4O/c23-18-17-20-19-16(15-9-5-2-6-10-15)22(17)12-11-21(18)13-14-7-3-1-4-8-14/h1,3-4,7-8,15H,2,5-6,9-13H2	2350	2	O=C1c2nnc(C3CCCCC3)n2CCN1Cc1ccccc1	delta_fused	P2X purinoceptor 7,Homo sapiens										1.08088										1
InChI=1S/C18H23N5O3S/c24-15(19-6-8-22-9-7-20-16(25)17(22)26)14-10-12-11-21-23(18(12)27-14)13-4-2-1-3-5-13/h10-11,13H,1-9H2,(H,19,24)(H,20,25)	2352	2	O=C1NCCN(CCNC(=O)c2cc3cnn(C4CCCCC4)c3s2)C1=O	delta_single	Phosphodiesterase 7A,Homo sapiens										1.2										1
InChI=1S/C18H24N2O2S/c21-16(11-10-14-6-2-1-3-7-14)19-15-8-4-9-17-20(18(15)22)12-5-13-23-17/h1-3,6-7,15,17H,4-5,8-13H2,(H,19,21)	2353	2	O=C(CCc1ccccc1)NC1CCCC2SCCCN2C1=O	epsilon_fused	Angiotensin-converting enzyme,Rattus norvegicus	Neprilysin,Rattus norvegicus									1.16667	1.125									1	1
InChI=1S/C18H25N3O2/c22-17-11-14(13-21(17)16-9-5-2-6-10-16)12-19-18(23)20-15-7-3-1-4-8-15/h2,5-6,9-10,14-15H,1,3-4,7-8,11-13H2,(H2,19,20,23)	2357	2	O=C(NCC1CC(=O)N(c2ccccc2)C1)NC1CCCCC1	gamma_single	Onchocerca ochengi,Onchocerca ochengi										1.22222										1
InChI=1S/C19H13N7O/c27-19-16-15(24-18(25-16)13-8-20-11-21-9-13)17(12-4-2-1-3-5-12)26(19)14-6-7-22-23-10-14/h1-11,17H,(H,24,25)	2359	2	O=C1c2nc(-c3cncnc3)[nH]c2C(c2ccccc2)N1c1ccnnc1	gamma_fused	p53-binding protein Mdm-2,Homo sapiens										1.24174										2
InChI=1S/C19H14N2O/c1-13-16-10-15-8-5-9-20-18(15)11-17(16)19(22)21(13)12-14-6-3-2-4-7-14/h2-11H,1,12H2	2361	2	C=C1c2cc3cccnc3cc2C(=O)N1Cc1ccccc1	gamma_fused	Human immunodeficiency virus type 1 integrase,Human immunodeficiency virus 1										2.32143										2
InChI=1S/C19H14N2O3/c22-18-19(12-24-17-10-20-8-7-15(17)19)14-5-1-2-6-16(14)21(18)11-13-4-3-9-23-13/h1-10H,11-12H2	2363	2	O=C1N(Cc2ccco2)c2ccccc2C12COc1cnccc12	gamma_fused	Cytochrome P450 3A4,Homo sapiens	Sodium channel protein type IX alpha subunit,Homo sapiens									8.98113	1.66234									1	1
InChI=1S/C19H14N4O2/c24-19-18-14(11-22(19)10-13-5-2-1-3-6-13)12-23-17(20-18)9-15(21-23)16-7-4-8-25-16/h1-9,12H,10-11H2	2364	2	O=C1c2nc3cc(-c4ccco4)nn3cc2CN1Cc1ccccc1	gamma_fused	Serine/threonine-protein kinase Aurora-A,Homo sapiens										1.17857										2
InChI=1S/C19H14N6O2S/c26-18-15(21-16-4-6-20-23-16)9-14(22-24-18)11-2-1-3-13(8-11)25-10-12-5-7-28-17(12)19(25)27/h1-9H,10H2,(H,24,26)(H2,20,21,22,23)	2365	2	O=C1c2sccc2CN1c1cccc(-c2cc(Nc3cc[nH]n3)c(=O)[nH]n2)c1	gamma_fused	Tyrosine-protein kinase BTK,Homo sapiens										1.07317										2
InChI=1S/C19H14N7O/c27-19-17-15(11-25(22-17)12-16-20-23-24-21-16)18(13-7-3-1-4-8-13)26(19)14-9-5-2-6-10-14/h1-11,18H,12H2/q-1	2366	2	O=C1c2nn(Cc3nnn[n-]3)cc2C(c2ccccc2)N1c1ccccc1	gamma_fused	p53-binding protein Mdm-2,Homo sapiens										1.24174										1
[truncated: 1,761 more rows]
